# Supplementary material for: Pericytes modulate brain vascular integrity in social stress and depression
Source: Research Square preprint supplement (doi:10.21203/rs.3.rs-5060339/v1), 2024-10-08
Supplement: Supplementary file 1 [file 6f7f7f824d886e6a2b5cb68d.xlsx]

## Sheet: Supplementary Table List
Supplementary table	Name	Associated figure
Supp.Table 1	DEGs between F PFC and M PFC microvessels	Fig. 1, Supp.Fig.3
Supp.Table 2	List of pericyte DEGs between F PFC and M PFC	Fig. 1, Supp.Fig.3
Supp. Table 3	Demographic data for human post-mortem tissue	Fig. 1, Supp.Fig.4
Supp. Table 4	DEGs of pericytes exposed to serum (MDD vs CTRL women)	Fig. 3-4
Supp.Table 5	Gene ontology (MF) of pericytes exposed to serum (MDD vs CTRL women)	Fig. 3k
Supp. Table 6	Correlations between ECM-related DEGs and CTRL samples	Fig. 3m
Supp. Table 7	Correlations between ECM-related DEGs and MDD samples	Fig. 3m
Supp. Table 8	DEGs of endothelial cells exposed to serum (MDD vs CTRL women)	Fig. 4
Supp. Table 9	Gene ontology (MF) of endothelial cells exposed to serum (MDD vs CTRL women)	Fig. 4c
Supp. Table 10	DEGs of pericytes exposed to endothelial secretome (MDD vs CTRL women)	Fig. 4d
Supp. Table 11	Demographic data for human blood serum cohort	Fig 3-4, Supp.Fig.9-10
Supp. Table 12	Mouse and human primers for qPCR
Supp. Table 13	Antibodies used for immunohistochemistry, western blot and flow cytometry

## Sheet: Supp.Table1
Supp.Table 1 - DEGs between F PFC and M PFC microvessels
external_gene_name	gene_biotype	description	log2FoldChange	pvalue	padj
Grm7	protein_coding	glutamate receptor, metabotropic 7 [Source:MGI Symbol;Acc:MGI:1351344]	5.34153	6.14558e-56	1.32431e-51
Cacna2d3	protein_coding	calcium channel, voltage-dependent, alpha2/delta subunit 3 [Source:MGI Symbol;Acc:MGI:1338890]	3.4828	1.54552e-27	1.66522e-23
Rbfox1	protein_coding	RNA binding protein, fox-1 homolog (C. elegans) 1 [Source:MGI Symbol;Acc:MGI:1926224]	3.17441	1.49148e-23	1.07133e-19
Stxbp5l	protein_coding	syntaxin binding protein 5-like [Source:MGI Symbol;Acc:MGI:2443815]	6.3002	4.76579e-23	2.56745e-19
St8sia3	protein_coding	ST8 alpha-N-acetyl-neuraminide alpha-2,8-sialyltransferase 3 [Source:MGI Symbol;Acc:MGI:106019]	4.15616	6.45474e-23	2.78186e-19
Ppp1r1a	protein_coding	protein phosphatase 1, regulatory inhibitor subunit 1A [Source:MGI Symbol;Acc:MGI:1889595]	-3.27062	3.26558e-22	1.17283e-18
Gm42771	TEC	predicted gene 42771 [Source:MGI Symbol;Acc:MGI:5662908]	5.1185	3.93417e-22	1.21111e-18
Cyp27a1	protein_coding	cytochrome P450, family 27, subfamily a, polypeptide 1 [Source:MGI Symbol;Acc:MGI:88594]	-7.19182	3.4362e-21	9.25583e-18
Ddx3y	protein_coding	DEAD box helicase 3, Y-linked [Source:MGI Symbol;Acc:MGI:1349406]	-13.8145	4.13007e-21	9.88877e-18
Bcat1	protein_coding	branched chain aminotransferase 1, cytosolic [Source:MGI Symbol;Acc:MGI:104861]	6.18034	2.23767e-19	4.82195e-16
Cntn4	protein_coding	contactin 4 [Source:MGI Symbol;Acc:MGI:1095737]	4.20517	3.2424e-19	6.35186e-16
Tubb6	protein_coding	tubulin, beta 6 class V [Source:MGI Symbol;Acc:MGI:1915201]	-4.48407	4.65017e-19	8.35053e-16
Slc16a11	protein_coding	solute carrier family 16 (monocarboxylic acid transporters), member 11 [Source:MGI Symbol;Acc:MGI:2663709]	-3.65484	1.91227e-18	3.1698e-15
Crabp2	protein_coding	cellular retinoic acid binding protein II [Source:MGI Symbol;Acc:MGI:88491]	-14.3487	2.07477e-18	3.19351e-15
Ano3	protein_coding	anoctamin 3 [Source:MGI Symbol;Acc:MGI:3613666]	4.49386	2.32388e-18	3.33849e-15
Gm43879	TEC	predicted gene, 43879 [Source:MGI Symbol;Acc:MGI:5690271]	7.18174	7.50599e-18	9.76862e-15
Gm37478	TEC	predicted gene, 37478 [Source:MGI Symbol;Acc:MGI:5610706]	5.06996	7.70646e-18	9.76862e-15
Adgrb3	protein_coding	adhesion G protein-coupled receptor B3 [Source:MGI Symbol;Acc:MGI:2441837]	4.25826	1.5089e-17	1.80641e-14
B4galt1	protein_coding	UDP-Gal:betaGlcNAc beta 1,4- galactosyltransferase, polypeptide 1 [Source:MGI Symbol;Acc:MGI:95705]	-1.71594	1.89232e-17	2.14619e-14
Pgd	protein_coding	phosphogluconate dehydrogenase [Source:MGI Symbol;Acc:MGI:97553]	-2.83084	2.49733e-17	2.69075e-14
Omd	protein_coding	osteomodulin [Source:MGI Symbol;Acc:MGI:1350918]	-8.62075	2.96938e-17	3.04701e-14
Nnat	protein_coding	neuronatin [Source:MGI Symbol;Acc:MGI:104716]	-4.93398	7.42608e-17	7.27385e-14
Gm56918	lncRNA	predicted gene, 56918 [Source:MGI Symbol;Acc:MGI:7337749]	-22.0022	1.02614e-16	9.61406e-14
Eif2s3y	protein_coding	eukaryotic translation initiation factor 2, subunit 3, structural gene Y-linked [Source:MGI Symbol;Acc:MGI:1349430]	-12.4696	1.6738e-16	1.50286e-13
Uty	protein_coding	ubiquitously transcribed tetratricopeptide repeat containing, Y-linked [Source:MGI Symbol;Acc:MGI:894810]	-12.1943	2.27862e-16	1.96408e-13
C230086J09Rik	TEC	RIKEN cDNA C230086J09 gene [Source:MGI Symbol;Acc:MGI:2443423]	4.83775	2.64075e-16	2.18867e-13
Slc12a5	protein_coding	solute carrier family 12, member 5 [Source:MGI Symbol;Acc:MGI:1862037]	3.83909	2.78712e-16	2.22443e-13
Klhl30	protein_coding	kelch-like 30 [Source:MGI Symbol;Acc:MGI:1918038]	-22.8457	3.15907e-16	2.43124e-13
Hcar1	protein_coding	hydrocarboxylic acid receptor 1 [Source:MGI Symbol;Acc:MGI:2441671]	-12.8246	4.24133e-16	3.1516e-13
Uap1l1	protein_coding	UDP-N-acteylglucosamine pyrophosphorylase 1-like 1 [Source:MGI Symbol;Acc:MGI:2443318]	-2.4809	4.67252e-16	3.35627e-13
Alcam	protein_coding	activated leukocyte cell adhesion molecule [Source:MGI Symbol;Acc:MGI:1313266]	-4.20371	5.65435e-16	3.93051e-13
Lrp1b	protein_coding	low density lipoprotein-related protein 1B [Source:MGI Symbol;Acc:MGI:2151136]	4.31534	6.40361e-16	4.16436e-13
H2-Q1	protein_coding	histocompatibility 2, Q region locus 1 [Source:MGI Symbol;Acc:MGI:95928]	-6.7105	6.45485e-16	4.16436e-13
Gm56190	miRNA	predicted gene, 56190 [Source:MGI Symbol;Acc:MGI:6848838]	-4.80044	6.57053e-16	4.16436e-13
Car10	protein_coding	carbonic anhydrase 10 [Source:MGI Symbol;Acc:MGI:1919855]	3.42756	1.24531e-15	7.66721e-13
Slc24a2	protein_coding	solute carrier family 24 (sodium/potassium/calcium exchanger), member 2 [Source:MGI Symbol;Acc:MGI:1923626]	5.07024	1.62655e-15	9.73627e-13
Gm11242	processed_pseudogene	predicted gene 11242 [Source:MGI Symbol;Acc:MGI:3652117]	5.52896	3.23542e-15	1.88432e-12
Nwd2	protein_coding	NACHT and WD repeat domain containing 2 [Source:MGI Symbol;Acc:MGI:1920464]	4.8501	4.22739e-15	2.39726e-12
Gm44676	TEC	predicted gene 44676 [Source:MGI Symbol;Acc:MGI:5753252]	6.39285	5.5168e-15	3.03122e-12
Lbp	protein_coding	lipopolysaccharide binding protein [Source:MGI Symbol;Acc:MGI:1098776]	-12.4608	5.62666e-15	3.03122e-12
Afap1	protein_coding	actin filament associated protein 1 [Source:MGI Symbol;Acc:MGI:1917542]	-2.42905	7.16844e-15	3.76763e-12
Ctxn3	protein_coding	cortexin 3 [Source:MGI Symbol;Acc:MGI:3642816]	-26.8097	7.36608e-15	3.77932e-12
Pigp	protein_coding	phosphatidylinositol glycan anchor biosynthesis, class P [Source:MGI Symbol;Acc:MGI:1860433]	-1.55978	8.39291e-15	4.20602e-12
Paqr9	protein_coding	progestin and adipoQ receptor family member IX [Source:MGI Symbol;Acc:MGI:1922802]	4.25196	1.12376e-14	5.50363e-12
Sycp2	protein_coding	synaptonemal complex protein 2 [Source:MGI Symbol;Acc:MGI:1933281]	7.52512	1.20048e-14	5.74872e-12
Mfsd5	protein_coding	major facilitator superfamily domain containing 5 [Source:MGI Symbol;Acc:MGI:2145901]	-2.88232	1.40317e-14	6.57322e-12
Gm42770	TEC	predicted gene 42770 [Source:MGI Symbol;Acc:MGI:5662907]	4.24147	1.44726e-14	6.63553e-12
Gm43874	TEC	predicted gene, 43874 [Source:MGI Symbol;Acc:MGI:5690266]	5.41366	3.65952e-14	1.6429e-11
Frmd3	protein_coding	FERM domain containing 3 [Source:MGI Symbol;Acc:MGI:2442466]	7.24723	4.02257e-14	1.74044e-11
Kdm5d	protein_coding	lysine demethylase 5D [Source:MGI Symbol;Acc:MGI:99780]	-11.3156	4.05303e-14	1.74044e-11
Gm44560	TEC	predicted gene 44560 [Source:MGI Symbol;Acc:MGI:5753136]	2.51286	4.11909e-14	1.74044e-11
Nlgn1	protein_coding	neuroligin 1 [Source:MGI Symbol;Acc:MGI:2179435]	4.66881	6.17013e-14	2.55693e-11
Arpp21	protein_coding	cyclic AMP-regulated phosphoprotein, 21 [Source:MGI Symbol;Acc:MGI:107562]	3.34404	7.49845e-14	3.04875e-11
Hecw1	protein_coding	HECT, C2 and WW domain containing E3 ubiquitin protein ligase 1 [Source:MGI Symbol;Acc:MGI:2444115]	4.60995	7.65823e-14	3.05606e-11
Jakmip1	protein_coding	janus kinase and microtubule interacting protein 1 [Source:MGI Symbol;Acc:MGI:1923321]	3.6195	1.42184e-13	5.57078e-11
Gm37965	TEC	predicted gene, 37965 [Source:MGI Symbol;Acc:MGI:5611193]	4.82433	1.47284e-13	5.57803e-11
Gm42772	TEC	predicted gene 42772 [Source:MGI Symbol;Acc:MGI:5662909]	4.74762	1.47546e-13	5.57803e-11
Adamts2	protein_coding	ADAM metallopeptidase with thrombospondin type 1 motif 2 [Source:MGI Symbol;Acc:MGI:1347356]	-7.16387	1.98689e-13	7.38199e-11
Gm48482	TEC	predicted gene, 48482 [Source:MGI Symbol;Acc:MGI:6098000]	10.262	3.01714e-13	1.10197e-10
Gm43174	TEC	predicted gene 43174 [Source:MGI Symbol;Acc:MGI:5663311]	5.25688	3.56723e-13	1.28117e-10
Grin2a	protein_coding	glutamate receptor, ionotropic, NMDA2A (epsilon 1) [Source:MGI Symbol;Acc:MGI:95820]	3.8305	3.84034e-13	1.35665e-10
Gprc5c	protein_coding	G protein-coupled receptor, family C, group 5, member C [Source:MGI Symbol;Acc:MGI:1917605]	-2.57593	3.97387e-13	1.38118e-10
Gm44847	TEC	predicted gene 44847 [Source:MGI Symbol;Acc:MGI:5753423]	6.88848	4.63557e-13	1.58558e-10
Gm43341	TEC	predicted gene 43341 [Source:MGI Symbol;Acc:MGI:5663478]	5.4056	5.53481e-13	1.86359e-10
Syt5	protein_coding	synaptotagmin V [Source:MGI Symbol;Acc:MGI:1926368]	2.69268	5.7969e-13	1.92181e-10
B230112I24Rik	TEC	RIKEN cDNA B230112I24 gene [Source:MGI Symbol;Acc:MGI:1925234]	10.6529	6.34247e-13	2.07082e-10
Lrrc4c	protein_coding	leucine rich repeat containing 4C [Source:MGI Symbol;Acc:MGI:2442636]	4.65704	7.49677e-13	2.41116e-10
Ptpn5	protein_coding	protein tyrosine phosphatase, non-receptor type 5 [Source:MGI Symbol;Acc:MGI:97807]	3.13148	9.50257e-13	3.01134e-10
Gm50403	TEC	predicted gene, 50403 [Source:MGI Symbol;Acc:MGI:6303316]	5.3299	1.08641e-12	3.3929e-10
Thsd4	protein_coding	thrombospondin, type I, domain containing 4 [Source:MGI Symbol;Acc:MGI:2672033]	-5.48355	1.10286e-12	3.39507e-10
Dclk1	protein_coding	doublecortin-like kinase 1 [Source:MGI Symbol;Acc:MGI:1330861]	2.38976	1.36809e-12	4.15226e-10
Snap25	protein_coding	synaptosomal-associated protein 25 [Source:MGI Symbol;Acc:MGI:98331]	3.03747	1.75781e-12	5.26097e-10
Elapor1	protein_coding	endosome-lysosome associated apoptosis and autophagy regulator 1 [Source:MGI Symbol;Acc:MGI:1923930]	4.87163	1.86987e-12	5.5197e-10
Zfp51	protein_coding	zinc finger protein 51 [Source:MGI Symbol;Acc:MGI:99198]	-5.60591	2.16106e-12	6.28253e-10
Bmp7	protein_coding	bone morphogenetic protein 7 [Source:MGI Symbol;Acc:MGI:103302]	-5.02667	2.1866e-12	6.28253e-10
Htr2c	protein_coding	5-hydroxytryptamine (serotonin) receptor 2C [Source:MGI Symbol;Acc:MGI:96281]	7.88527	2.23625e-12	6.34065e-10
Grin2b	protein_coding	glutamate receptor, ionotropic, NMDA2B (epsilon 2) [Source:MGI Symbol;Acc:MGI:95821]	4.10898	2.35204e-12	6.58235e-10
Efemp1	protein_coding	epidermal growth factor-containing fibulin-like extracellular matrix protein 1 [Source:MGI Symbol;Acc:MGI:1339998]	-6.32193	3.10038e-12	8.56539e-10
Slitrk5	protein_coding	SLIT and NTRK-like family, member 5 [Source:MGI Symbol;Acc:MGI:2679448]	3.52968	3.80332e-12	1.03744e-09
Tlr7	protein_coding	toll-like receptor 7 [Source:MGI Symbol;Acc:MGI:2176882]	-21.7773	4.62564e-12	1.24597e-09
Slc2a3	protein_coding	solute carrier family 2 (facilitated glucose transporter), member 3 [Source:MGI Symbol;Acc:MGI:95757]	4.03039	5.58062e-12	1.48465e-09
Gm37363	TEC	predicted gene, 37363 [Source:MGI Symbol;Acc:MGI:5610591]	8.52706	5.9255e-12	1.55718e-09
Plppr4	protein_coding	phospholipid phosphatase related 4 [Source:MGI Symbol;Acc:MGI:106530]	3.11935	6.26153e-12	1.62566e-09
Gm42737	TEC	predicted gene 42737 [Source:MGI Symbol;Acc:MGI:5662874]	7.61029	6.34509e-12	1.62774e-09
Arhgef4	protein_coding	Rho guanine nucleotide exchange factor 4 [Source:MGI Symbol;Acc:MGI:2442507]	2.31084	6.68185e-12	1.69397e-09
Atp1a2	protein_coding	ATPase, Na+/K+ transporting, alpha 2 polypeptide [Source:MGI Symbol;Acc:MGI:88106]	-2.38735	8.15493e-12	2.04338e-09
Ogfod3	protein_coding	2-oxoglutarate and iron-dependent oxygenase domain containing 3 [Source:MGI Symbol;Acc:MGI:1913429]	-5.0693	1.02707e-11	2.54395e-09
Kit	protein_coding	KIT proto-oncogene receptor tyrosine kinase [Source:MGI Symbol;Acc:MGI:96677]	-3.77039	1.03956e-11	2.54562e-09
Nrip3	protein_coding	nuclear receptor interacting protein 3 [Source:MGI Symbol;Acc:MGI:1925843]	3.9178	1.05925e-11	2.5647e-09
Hes6	protein_coding	hairy and enhancer of split 6 [Source:MGI Symbol;Acc:MGI:1859852]	-2.48805	1.10753e-11	2.6518e-09
Ptgfr	protein_coding	prostaglandin F receptor [Source:MGI Symbol;Acc:MGI:97796]	-6.45701	1.19491e-11	2.81989e-09
Arhgap44	protein_coding	Rho GTPase activating protein 44 [Source:MGI Symbol;Acc:MGI:2144423]	1.80978	1.20391e-11	2.81989e-09
Cd14	protein_coding	CD14 antigen [Source:MGI Symbol;Acc:MGI:88318]	-11.0735	1.32811e-11	3.07736e-09
Mir124-2hg	lncRNA	Mir124-2 host gene (non-protein coding) [Source:MGI Symbol;Acc:MGI:1917691]	4.14869	1.49941e-11	3.43732e-09
Gm26871	lncRNA	predicted gene, 26871 [Source:MGI Symbol;Acc:MGI:5477365]	4.44862	1.74092e-11	3.94896e-09
Gm44801	TEC	predicted gene 44801 [Source:MGI Symbol;Acc:MGI:5753377]	4.88278	1.94849e-11	4.37376e-09
Hook1	protein_coding	hook microtubule tethering protein 1 [Source:MGI Symbol;Acc:MGI:1925213]	3.57965	2.09806e-11	4.66093e-09
Gm49674	TEC	predicted gene, 49674 [Source:MGI Symbol;Acc:MGI:6215119]	5.60828	2.28866e-11	5.03248e-09
Fam135b	protein_coding	family with sequence similarity 135, member B [Source:MGI Symbol;Acc:MGI:1917613]	4.80669	2.3496e-11	5.11431e-09
Slitrk4	protein_coding	SLIT and NTRK-like family, member 4 [Source:MGI Symbol;Acc:MGI:2442509]	5.42482	2.90553e-11	6.26112e-09
Gm38263	TEC	predicted gene, 38263 [Source:MGI Symbol;Acc:MGI:5611491]	8.58272	3.03727e-11	6.48021e-09
Grik3	protein_coding	glutamate receptor, ionotropic, kainate 3 [Source:MGI Symbol;Acc:MGI:95816]	6.32153	3.10417e-11	6.55801e-09
Kcnma1	protein_coding	potassium large conductance calcium-activated channel, subfamily M, alpha member 1 [Source:MGI Symbol;Acc:MGI:99923]	3.36366	3.59753e-11	7.52652e-09
Rab3c	protein_coding	RAB3C, member RAS oncogene family [Source:MGI Symbol;Acc:MGI:1914545]	3.61532	3.84402e-11	7.96488e-09
Gm43486	TEC	predicted gene 43486 [Source:MGI Symbol;Acc:MGI:5663623]	6.02431	4.26294e-11	8.68663e-09
Gm44229	TEC	predicted gene, 44229 [Source:MGI Symbol;Acc:MGI:5690621]	7.18853	4.27504e-11	8.68663e-09
Stmn4	protein_coding	stathmin-like 4 [Source:MGI Symbol;Acc:MGI:1931224]	3.41655	4.3501e-11	8.68663e-09
Grm5	protein_coding	glutamate receptor, metabotropic 5 [Source:MGI Symbol;Acc:MGI:1351342]	3.35031	4.35359e-11	8.68663e-09
Gabrg2	protein_coding	gamma-aminobutyric acid type A receptor, subunit gamma 2 [Source:MGI Symbol;Acc:MGI:95623]	5.26888	4.50763e-11	8.91146e-09
Gm20371	TEC	predicted gene, 20371 [Source:MGI Symbol;Acc:MGI:5012556]	3.61915	4.62385e-11	9.05812e-09
Rbp1	protein_coding	retinol binding protein 1, cellular [Source:MGI Symbol;Acc:MGI:97876]	-3.28141	4.77316e-11	9.26638e-09
Sema3a	protein_coding	sema domain, immunoglobulin domain (Ig), short basic domain, secreted, (semaphorin) 3A [Source:MGI Symbol;Acc:MGI:107558]	-4.88981	5.12637e-11	9.86323e-09
Gm43670	TEC	predicted gene 43670 [Source:MGI Symbol;Acc:MGI:5663807]	4.9193	5.61995e-11	1.07172e-08
Trp53i11	protein_coding	transformation related protein 53 inducible protein 11 [Source:MGI Symbol;Acc:MGI:2670995]	-3.09979	6.02847e-11	1.13954e-08
Mog	protein_coding	myelin oligodendrocyte glycoprotein [Source:MGI Symbol;Acc:MGI:97435]	7.40511	7.52211e-11	1.40951e-08
2900027M19Rik	TEC	RIKEN cDNA 2900027M19 gene [Source:MGI Symbol;Acc:MGI:1920130]	4.93881	8.26276e-11	1.53495e-08
Kctd16	protein_coding	potassium channel tetramerisation domain containing 16 [Source:MGI Symbol;Acc:MGI:1914659]	4.75898	9.35456e-11	1.72292e-08
Gm43875	TEC	predicted gene, 43875 [Source:MGI Symbol;Acc:MGI:5690267]	7.3077	1.00435e-10	1.83414e-08
Mas1	protein_coding	MAS1 oncogene [Source:MGI Symbol;Acc:MGI:96918]	8.44829	1.06014e-10	1.91088e-08
Eml5	protein_coding	echinoderm microtubule associated protein like 5 [Source:MGI Symbol;Acc:MGI:2442513]	2.47261	1.06495e-10	1.91088e-08
Anxa8	protein_coding	annexin A8 [Source:MGI Symbol;Acc:MGI:1201374]	-10.9923	1.07298e-10	1.91088e-08
Lrfn5	protein_coding	leucine rich repeat and fibronectin type III domain containing 5 [Source:MGI Symbol;Acc:MGI:2144814]	4.22916	1.11199e-10	1.96413e-08
Gfod1	protein_coding	glucose-fructose oxidoreductase domain containing 1 [Source:MGI Symbol;Acc:MGI:2145304]	1.57156	1.13272e-10	1.98447e-08
Gm15261	lncRNA	predicted gene 15261 [Source:MGI Symbol;Acc:MGI:3705201]	-5.98743	1.1898e-10	2.06766e-08
Nos1ap	protein_coding	nitric oxide synthase 1 (neuronal) adaptor protein [Source:MGI Symbol;Acc:MGI:1917979]	2.78911	1.23657e-10	2.13174e-08
Gm45130	TEC	predicted gene 45130 [Source:MGI Symbol;Acc:MGI:5753706]	8.0749	1.2486e-10	2.13541e-08
Pdpn	protein_coding	podoplanin [Source:MGI Symbol;Acc:MGI:103098]	-3.63411	1.39346e-10	2.36438e-08
Scn3a	protein_coding	sodium channel, voltage-gated, type III, alpha [Source:MGI Symbol;Acc:MGI:98249]	3.16119	1.49732e-10	2.52076e-08
Sgip1	protein_coding	SH3-domain GRB2-like (endophilin) interacting protein 1 [Source:MGI Symbol;Acc:MGI:1920344]	2.22434	1.58642e-10	2.65007e-08
9530059O14Rik	lncRNA	RIKEN cDNA 9530059O14 gene [Source:MGI Symbol;Acc:MGI:2442421]	4.0822	1.60291e-10	2.65066e-08
Cacna2d1	protein_coding	calcium channel, voltage-dependent, alpha2/delta subunit 1 [Source:MGI Symbol;Acc:MGI:88295]	2.76067	1.61138e-10	2.65066e-08
Slc6a12	protein_coding	solute carrier family 6 (neurotransmitter transporter, betaine/GABA), member 12 [Source:MGI Symbol;Acc:MGI:95628]	-4.70466	1.78758e-10	2.91823e-08
Tenm4	protein_coding	teneurin transmembrane protein 4 [Source:MGI Symbol;Acc:MGI:2447063]	3.34335	2.00164e-10	3.24311e-08
Bnc2	protein_coding	basonuclin zinc finger protein 2 [Source:MGI Symbol;Acc:MGI:2443805]	-25.7454	2.06702e-10	3.32404e-08
Zkscan5	protein_coding	zinc finger with KRAB and SCAN domains 5 [Source:MGI Symbol;Acc:MGI:107533]	-6.98511	2.23519e-10	3.56787e-08
Gprc5a	protein_coding	G protein-coupled receptor, family C, group 5, member A [Source:MGI Symbol;Acc:MGI:1891250]	-9.78055	2.407e-10	3.81385e-08
Xist	lncRNA	inactive X specific transcripts [Source:MGI Symbol;Acc:MGI:98974]	15.8201	2.53433e-10	3.9863e-08
Tlr4	protein_coding	toll-like receptor 4 [Source:MGI Symbol;Acc:MGI:96824]	-10.4792	2.61953e-10	4.09045e-08
Gm32391	lncRNA	predicted gene, 32391 [Source:MGI Symbol;Acc:MGI:5591550]	7.4929	2.7543e-10	4.26995e-08
Csf2ra	protein_coding	colony stimulating factor 2 receptor, alpha, low-affinity (granulocyte-macrophage) [Source:MGI Symbol;Acc:MGI:1339754]	1.67404	2.78266e-10	4.28312e-08
Gm37005	TEC	predicted gene, 37005 [Source:MGI Symbol;Acc:MGI:5610233]	9.78504	3.10149e-10	4.73999e-08
Vxn	protein_coding	vexin [Source:MGI Symbol;Acc:MGI:1924232]	3.1301	3.17462e-10	4.81759e-08
Gm19932	processed_pseudogene	predicted gene, 19932 [Source:MGI Symbol;Acc:MGI:5012117]	4.68625	3.28902e-10	4.9563e-08
Pdzk1ip1	protein_coding	PDZK1 interacting protein 1 [Source:MGI Symbol;Acc:MGI:1914432]	-11.91	3.44534e-10	5.12333e-08
Prg4	protein_coding	proteoglycan 4 (megakaryocyte stimulating factor, articular superficial zone protein) [Source:MGI Symbol;Acc:MGI:1891344]	-6.48013	3.44741e-10	5.12333e-08
Syt1	protein_coding	synaptotagmin I [Source:MGI Symbol;Acc:MGI:99667]	3.77948	3.57625e-10	5.27604e-08
Spag5	protein_coding	sperm associated antigen 5 [Source:MGI Symbol;Acc:MGI:1927470]	6.5847	3.59914e-10	5.27604e-08
Rian	lncRNA	RNA imprinted and accumulated in nucleus [Source:MGI Symbol;Acc:MGI:1922995]	3.53994	4.01439e-10	5.84501e-08
Tcte2	lncRNA	t-complex-associated testis expressed 2 [Source:MGI Symbol;Acc:MGI:98641]	-9.72925	4.16325e-10	6.02106e-08
Arfgef3	protein_coding	ARFGEF family member 3 [Source:MGI Symbol;Acc:MGI:106387]	3.94309	4.49353e-10	6.4554e-08
Qprt	protein_coding	quinolinate phosphoribosyltransferase [Source:MGI Symbol;Acc:MGI:1914625]	-11.4595	4.56292e-10	6.51168e-08
Nfe2	protein_coding	nuclear factor, erythroid derived 2 [Source:MGI Symbol;Acc:MGI:97308]	-21.7254	4.6863e-10	6.64375e-08
Ptprn	protein_coding	protein tyrosine phosphatase receptor type N [Source:MGI Symbol;Acc:MGI:102765]	2.87023	5.11569e-10	7.2051e-08
Urb2	protein_coding	URB2 ribosome biogenesis 2 homolog (S. cerevisiae) [Source:MGI Symbol;Acc:MGI:2681124]	-5.83852	5.15505e-10	7.21339e-08
3110080E11Rik	TEC	RIKEN cDNA 3110080E11 gene [Source:MGI Symbol;Acc:MGI:1920469]	6.01219	5.37733e-10	7.47587e-08
Cdh1	protein_coding	cadherin 1 [Source:MGI Symbol;Acc:MGI:88354]	-27.3468	5.47907e-10	7.56849e-08
2610307P16Rik	lncRNA	RIKEN cDNA 2610307P16 gene [Source:MGI Symbol;Acc:MGI:1919768]	-9.75222	5.81093e-10	7.97577e-08
Gm44230	TEC	predicted gene, 44230 [Source:MGI Symbol;Acc:MGI:5690622]	4.36444	5.9999e-10	8.18082e-08
Ptgdr	protein_coding	prostaglandin D receptor [Source:MGI Symbol;Acc:MGI:102966]	-10.7165	6.03625e-10	8.18082e-08
Pcnx2	protein_coding	pecanex homolog 2 [Source:MGI Symbol;Acc:MGI:2445010]	3.33746	6.09051e-10	8.20277e-08
Chst1	protein_coding	carbohydrate sulfotransferase 1 [Source:MGI Symbol;Acc:MGI:1924219]	2.98906	6.33868e-10	8.48399e-08
Epha5	protein_coding	Eph receptor A5 [Source:MGI Symbol;Acc:MGI:99654]	3.08897	6.70734e-10	8.922e-08
Galnt16	protein_coding	polypeptide N-acetylgalactosaminyltransferase 16 [Source:MGI Symbol;Acc:MGI:1917754]	3.32322	6.8474e-10	9.05243e-08
Ppp1r3b	protein_coding	protein phosphatase 1, regulatory subunit 3B [Source:MGI Symbol;Acc:MGI:2177268]	-12.2757	7.49742e-10	9.79334e-08
Hs3st6	protein_coding	heparan sulfate (glucosamine) 3-O-sulfotransferase 6 [Source:MGI Symbol;Acc:MGI:3580487]	-10.6473	7.49873e-10	9.79334e-08
Snx8	protein_coding	sorting nexin 8 [Source:MGI Symbol;Acc:MGI:2443816]	-6.33498	8.54122e-10	1.10876e-07
Thbd	protein_coding	thrombomodulin [Source:MGI Symbol;Acc:MGI:98736]	-3.31387	8.70606e-10	1.12339e-07
Atcay	protein_coding	ataxia, cerebellar, Cayman type [Source:MGI Symbol;Acc:MGI:2448730]	3.12482	8.93366e-10	1.1459e-07
Sned1	protein_coding	sushi, nidogen and EGF-like domains 1 [Source:MGI Symbol;Acc:MGI:3045960]	-3.55355	9.25521e-10	1.18001e-07
Mrpl18	protein_coding	mitochondrial ribosomal protein L18 [Source:MGI Symbol;Acc:MGI:1914931]	-1.38936	9.30907e-10	1.18001e-07
Gm45177	TEC	predicted gene 45177 [Source:MGI Symbol;Acc:MGI:5753753]	6.6527	9.68078e-10	1.21995e-07
Tmem179	protein_coding	transmembrane protein 179 [Source:MGI Symbol;Acc:MGI:2144891]	3.76944	1.04577e-09	1.31019e-07
Thbs2	protein_coding	thrombospondin 2 [Source:MGI Symbol;Acc:MGI:98738]	-3.37181	1.07127e-09	1.33438e-07
Lpcat1	protein_coding	lysophosphatidylcholine acyltransferase 1 [Source:MGI Symbol;Acc:MGI:2384812]	1.89115	1.07791e-09	1.33493e-07
Unc79	protein_coding	unc-79 homolog [Source:MGI Symbol;Acc:MGI:2684729]	3.27555	1.09263e-09	1.34543e-07
Nrxn3	protein_coding	neurexin III [Source:MGI Symbol;Acc:MGI:1096389]	2.87606	1.12055e-09	1.37012e-07
Lamp2	protein_coding	lysosomal-associated membrane protein 2 [Source:MGI Symbol;Acc:MGI:96748]	-2.26197	1.1254e-09	1.37012e-07
Rasgrf1	protein_coding	RAS protein-specific guanine nucleotide-releasing factor 1 [Source:MGI Symbol;Acc:MGI:99694]	3.15716	1.1793e-09	1.42768e-07
Syt4	protein_coding	synaptotagmin IV [Source:MGI Symbol;Acc:MGI:101759]	3.24987	1.1894e-09	1.43186e-07
Tmem130	protein_coding	transmembrane protein 130 [Source:MGI Symbol;Acc:MGI:3607706]	4.04067	1.21073e-09	1.44945e-07
Sel1l3	protein_coding	sel-1 suppressor of lin-12-like 3 (C. elegans) [Source:MGI Symbol;Acc:MGI:1916941]	4.50428	1.27525e-09	1.51826e-07
Osbpl6	protein_coding	oxysterol binding protein-like 6 [Source:MGI Symbol;Acc:MGI:2139014]	2.03823	1.32336e-09	1.56687e-07
Lingo1	protein_coding	leucine rich repeat and Ig domain containing 1 [Source:MGI Symbol;Acc:MGI:1915522]	2.6628	1.33728e-09	1.5747e-07
Gm44541	TEC	predicted gene 44541 [Source:MGI Symbol;Acc:MGI:5753117]	4.99008	1.35451e-09	1.58084e-07
Syp	protein_coding	synaptophysin [Source:MGI Symbol;Acc:MGI:98467]	2.60424	1.35716e-09	1.58084e-07
Tyro3	protein_coding	TYRO3 protein tyrosine kinase 3 [Source:MGI Symbol;Acc:MGI:104294]	2.61546	1.36721e-09	1.58398e-07
Gabra5	protein_coding	gamma-aminobutyric acid type A receptor subunit alpha 5 [Source:MGI Symbol;Acc:MGI:95617]	8.18264	1.37823e-09	1.58821e-07
Clec3b	protein_coding	C-type lectin domain family 3, member b [Source:MGI Symbol;Acc:MGI:104540]	-6.06179	1.40069e-09	1.6055e-07
Traf4	protein_coding	TNF receptor associated factor 4 [Source:MGI Symbol;Acc:MGI:1202880]	-10.3901	1.45985e-09	1.66446e-07
Sdc1	protein_coding	syndecan 1 [Source:MGI Symbol;Acc:MGI:1349162]	-5.97727	1.51191e-09	1.71474e-07
Fgfbp1	protein_coding	fibroblast growth factor binding protein 1 [Source:MGI Symbol;Acc:MGI:1096350]	-6.34066	1.52655e-09	1.72229e-07
Homer1	protein_coding	homer scaffolding protein 1 [Source:MGI Symbol;Acc:MGI:1347345]	3.13672	1.5454e-09	1.73447e-07
S100a10	protein_coding	S100 calcium binding protein A10 (calpactin) [Source:MGI Symbol;Acc:MGI:1339468]	-3.11146	1.59714e-09	1.78326e-07
Rel	protein_coding	reticuloendotheliosis oncogene [Source:MGI Symbol;Acc:MGI:97897]	-7.9968	1.74464e-09	1.9379e-07
Rtl1	protein_coding	retrotransposon Gaglike 1 [Source:MGI Symbol;Acc:MGI:2656842]	4.86241	1.91126e-09	2.11209e-07
Gria2	protein_coding	glutamate receptor, ionotropic, AMPA2 (alpha 2) [Source:MGI Symbol;Acc:MGI:95809]	3.74683	2.13799e-09	2.35059e-07
Snhg14	lncRNA	small nucleolar RNA host gene 14 [Source:MGI Symbol;Acc:MGI:1289201]	2.65285	2.25208e-09	2.46346e-07
Gm37706	TEC	predicted gene, 37706 [Source:MGI Symbol;Acc:MGI:5610934]	5.44703	2.26508e-09	2.46516e-07
Ahnak	protein_coding	AHNAK nucleoprotein [Source:MGI Symbol;Acc:MGI:1316648]	-1.67765	2.38332e-09	2.57009e-07
Csrnp3	protein_coding	cysteine-serine-rich nuclear protein 3 [Source:MGI Symbol;Acc:MGI:1925021]	6.66082	2.38534e-09	2.57009e-07
	lncRNA	novel transcript	-11.7475	2.49043e-09	2.66997e-07
Nefh	protein_coding	neurofilament, heavy polypeptide [Source:MGI Symbol;Acc:MGI:97309]	6.50628	2.53303e-09	2.70219e-07
Foxd1	protein_coding	forkhead box D1 [Source:MGI Symbol;Acc:MGI:1347463]	-4.16066	2.59364e-09	2.75322e-07
Eya2	protein_coding	EYA transcriptional coactivator and phosphatase 2 [Source:MGI Symbol;Acc:MGI:109341]	-7.42928	2.67396e-09	2.82457e-07
C030017B01Rik	lncRNA	RIKEN cDNA C030017B01 gene [Source:MGI Symbol;Acc:MGI:1924774]	4.17104	2.7303e-09	2.87001e-07
Plagl2	protein_coding	pleiomorphic adenoma gene-like 2 [Source:MGI Symbol;Acc:MGI:1933165]	-3.64605	2.75825e-09	2.88531e-07
Cadm3	protein_coding	cell adhesion molecule 3 [Source:MGI Symbol;Acc:MGI:2137858]	3.20251	2.79916e-09	2.91396e-07
Dpysl5	protein_coding	dihydropyrimidinase-like 5 [Source:MGI Symbol;Acc:MGI:1929772]	9.93323	2.87243e-09	2.97586e-07
Gm44846	TEC	predicted gene 44846 [Source:MGI Symbol;Acc:MGI:5753422]	6.94002	2.95525e-09	3.04702e-07
Olfm1	protein_coding	olfactomedin 1 [Source:MGI Symbol;Acc:MGI:1860437]	2.8297	3.13901e-09	3.22107e-07
Lrrtm3	protein_coding	leucine rich repeat transmembrane neuronal 3 [Source:MGI Symbol;Acc:MGI:2389177]	4.48309	3.15924e-09	3.22647e-07
Rem2	protein_coding	rad and gem related GTP binding protein 2 [Source:MGI Symbol;Acc:MGI:2155260]	10.1686	3.17981e-09	3.23215e-07
Rgs7	protein_coding	regulator of G protein signaling 7 [Source:MGI Symbol;Acc:MGI:1346089]	2.42586	3.24306e-09	3.28097e-07
Tmem86a	protein_coding	transmembrane protein 86A [Source:MGI Symbol;Acc:MGI:1915143]	-3.6301	3.3771e-09	3.40061e-07
B230334C09Rik	lncRNA	RIKEN cDNA B230334C09 gene [Source:MGI Symbol;Acc:MGI:2442224]	3.65997	3.41461e-09	3.42239e-07
6330415B21Rik	TEC	RIKEN cDNA 6330415B21 gene [Source:MGI Symbol;Acc:MGI:1918003]	2.98638	3.50824e-09	3.49995e-07
Scn1a	protein_coding	sodium channel, voltage-gated, type I, alpha [Source:MGI Symbol;Acc:MGI:98246]	3.63508	3.70274e-09	3.67697e-07
Tnik	protein_coding	TRAF2 and NCK interacting kinase [Source:MGI Symbol;Acc:MGI:1916264]	2.63417	3.74491e-09	3.68843e-07
Snap91	protein_coding	synaptosomal-associated protein 91 [Source:MGI Symbol;Acc:MGI:109132]	3.15063	3.74851e-09	3.68843e-07
Gm47088	TEC	predicted gene, 47088 [Source:MGI Symbol;Acc:MGI:6095816]	5.56533	3.78571e-09	3.7081e-07
Slc13a3	protein_coding	solute carrier family 13 (sodium-dependent dicarboxylate transporter), member 3 [Source:MGI Symbol;Acc:MGI:2149635]	-4.35384	3.87512e-09	3.76823e-07
Gucy2g	protein_coding	guanylate cyclase 2g [Source:MGI Symbol;Acc:MGI:106025]	9.89337	3.88207e-09	3.76823e-07
Pde10a	protein_coding	phosphodiesterase 10A [Source:MGI Symbol;Acc:MGI:1345143]	3.14384	3.90829e-09	3.77667e-07
Gm48138	TEC	predicted gene, 48138 [Source:MGI Symbol;Acc:MGI:6097502]	-4.03158	3.99774e-09	3.84586e-07
Gm45619	lncRNA	predicted gene 45619 [Source:MGI Symbol;Acc:MGI:5791455]	3.10454	4.44542e-09	4.25753e-07
1700003M07Rik	lncRNA	RIKEN cDNA 1700003M07 gene [Source:MGI Symbol;Acc:MGI:1919475]	7.55357	4.5516e-09	4.33993e-07
Tmem178	protein_coding	transmembrane protein 178 [Source:MGI Symbol;Acc:MGI:1915277]	4.29325	4.61637e-09	4.3823e-07
Gm37899	TEC	predicted gene, 37899 [Source:MGI Symbol;Acc:MGI:5611127]	4.02112	4.93402e-09	4.6633e-07
Cybb	protein_coding	cytochrome b-245, beta polypeptide [Source:MGI Symbol;Acc:MGI:88574]	-10.0973	4.96706e-09	4.67403e-07
Bahcc1	protein_coding	BAH domain and coiled-coil containing 1 [Source:MGI Symbol;Acc:MGI:2679272]	-7.41757	5.06761e-09	4.74791e-07
Ube3a	protein_coding	ubiquitin protein ligase E3A [Source:MGI Symbol;Acc:MGI:105098]	2.01227	5.2291e-09	4.87801e-07
Mirg	lncRNA	miRNA containing gene [Source:MGI Symbol;Acc:MGI:3781106]	3.30507	5.40662e-09	5.02186e-07
Gm43046	TEC	predicted gene 43046 [Source:MGI Symbol;Acc:MGI:5663183]	7.21131	5.4672e-09	5.04139e-07
Dgke	protein_coding	diacylglycerol kinase, epsilon [Source:MGI Symbol;Acc:MGI:1889276]	1.80121	5.47444e-09	5.04139e-07
Gm43047	TEC	predicted gene 43047 [Source:MGI Symbol;Acc:MGI:5663184]	6.64918	5.64344e-09	5.17491e-07
Nbl1	protein_coding	NBL1, DAN family BMP antagonist [Source:MGI Symbol;Acc:MGI:104591]	-4.28573	5.72756e-09	5.2298e-07
Gm44675	TEC	predicted gene 44675 [Source:MGI Symbol;Acc:MGI:5753251]	4.93635	6.16975e-09	5.60979e-07
Zic4	protein_coding	zinc finger protein of the cerebellum 4 [Source:MGI Symbol;Acc:MGI:107201]	-3.85223	6.31824e-09	5.72066e-07
Unc80	protein_coding	unc-80, NALCN activator [Source:MGI Symbol;Acc:MGI:2652882]	3.40031	6.35394e-09	5.72891e-07
Kcnh7	protein_coding	potassium voltage-gated channel, subfamily H (eag-related), member 7 [Source:MGI Symbol;Acc:MGI:2159566]	4.23662	6.48107e-09	5.81919e-07
Gm44228	TEC	predicted gene, 44228 [Source:MGI Symbol;Acc:MGI:5690620]	5.13813	6.71477e-09	6.004e-07
R3hdm1	protein_coding	R3H domain containing 1 [Source:MGI Symbol;Acc:MGI:2448514]	2.30299	6.81698e-09	6.07021e-07
Lmntd1	protein_coding	lamin tail domain containing 1 [Source:MGI Symbol;Acc:MGI:1921321]	-2.21176	6.93208e-09	6.1473e-07
Celf5	protein_coding	CUGBP, Elav-like family member 5 [Source:MGI Symbol;Acc:MGI:2442333]	3.36095	7.13247e-09	6.29909e-07
Gm37686	TEC	predicted gene, 37686 [Source:MGI Symbol;Acc:MGI:5610914]	9.67399	7.4378e-09	6.52596e-07
Fsd1	protein_coding	fibronectin type 3 and SPRY domain-containing protein [Source:MGI Symbol;Acc:MGI:1934858]	3.2084	7.44993e-09	6.52596e-07
Hyal3	protein_coding	hyaluronoglucosaminidase 3 [Source:MGI Symbol;Acc:MGI:1330288]	-20.744	7.5491e-09	6.58606e-07
Nap1l5	protein_coding	nucleosome assembly protein 1-like 5 [Source:MGI Symbol;Acc:MGI:1923555]	3.24487	7.70104e-09	6.69152e-07
Kcnh1	protein_coding	potassium voltage-gated channel, subfamily H (eag-related), member 1 [Source:MGI Symbol;Acc:MGI:1341721]	4.65323	8.32487e-09	7.19213e-07
Bdh2	protein_coding	3-hydroxybutyrate dehydrogenase, type 2 [Source:MGI Symbol;Acc:MGI:1917022]	-11.6528	8.34392e-09	7.19213e-07
Tfpi	protein_coding	tissue factor pathway inhibitor [Source:MGI Symbol;Acc:MGI:1095418]	-2.20896	8.75542e-09	7.51675e-07
Cntnap3	protein_coding	contactin associated protein-like 3 [Source:MGI Symbol;Acc:MGI:3588199]	9.16357	8.92455e-09	7.63155e-07
Dpysl4	protein_coding	dihydropyrimidinase-like 4 [Source:MGI Symbol;Acc:MGI:1349764]	4.99425	9.55728e-09	8.14031e-07
Lin7b	protein_coding	lin-7 homolog B, crumbs cell polarity complex component [Source:MGI Symbol;Acc:MGI:1330858]	3.07349	9.8809e-09	8.38281e-07
Gm10134	lncRNA	predicted gene 10134 [Source:MGI Symbol;Acc:MGI:3642322]	-3.74664	9.97094e-09	8.42603e-07
Aebp1	protein_coding	AE binding protein 1 [Source:MGI Symbol;Acc:MGI:1197012]	-4.73675	1.01986e-08	8.58477e-07
Gm43175	TEC	predicted gene 43175 [Source:MGI Symbol;Acc:MGI:5663312]	4.36639	1.05895e-08	8.87914e-07
Foxc2	protein_coding	forkhead box C2 [Source:MGI Symbol;Acc:MGI:1347481]	-12.2992	1.06691e-08	8.91121e-07
Gm10558	lncRNA	predicted gene 10558 [Source:MGI Symbol;Acc:MGI:3642906]	4.45325	1.13953e-08	9.48098e-07
Sash3	protein_coding	SAM and SH3 domain containing 3 [Source:MGI Symbol;Acc:MGI:1921381]	-9.3865	1.20048e-08	9.94966e-07
Cd48	protein_coding	CD48 antigen [Source:MGI Symbol;Acc:MGI:88339]	-9.01216	1.20539e-08	9.95212e-07
Slc35f4	protein_coding	solute carrier family 35, member F4 [Source:MGI Symbol;Acc:MGI:1922538]	4.92069	1.21639e-08	1.00046e-06
Gm42497	TEC	predicted gene 42497 [Source:MGI Symbol;Acc:MGI:5662634]	10.2851	1.22514e-08	1.00382e-06
Gm47097	TEC	predicted gene, 47097 [Source:MGI Symbol;Acc:MGI:6095831]	3.51954	1.26108e-08	1.02935e-06
H2-Eb1	protein_coding	histocompatibility 2, class II antigen E beta [Source:MGI Symbol;Acc:MGI:95901]	-6.83898	1.26786e-08	1.02939e-06
Rab32	protein_coding	RAB32, member RAS oncogene family [Source:MGI Symbol;Acc:MGI:1915094]	-10.4809	1.27067e-08	1.02939e-06
Pfdn2	protein_coding	prefoldin 2 [Source:MGI Symbol;Acc:MGI:1276111]	1.2584	1.27757e-08	1.0311e-06
Gm42583	TEC	predicted gene 42583 [Source:MGI Symbol;Acc:MGI:5662720]	4.4322	1.31915e-08	1.06068e-06
Prdm6	protein_coding	PR domain containing 6 [Source:MGI Symbol;Acc:MGI:2684938]	-25.0393	1.33856e-08	1.07229e-06
C2	protein_coding	complement C2 [Source:MGI Symbol;Acc:MGI:88226]	-10.5034	1.36434e-08	1.0889e-06
Pcdh15	protein_coding	protocadherin 15 [Source:MGI Symbol;Acc:MGI:1891428]	4.36029	1.41725e-08	1.12695e-06
Gm45182	TEC	predicted gene 45182 [Source:MGI Symbol;Acc:MGI:5753758]	4.28814	1.45868e-08	1.15563e-06
Stard8	protein_coding	StAR related lipid transfer domain containing 8 [Source:MGI Symbol;Acc:MGI:2448556]	-1.03823	1.50939e-08	1.19142e-06
Lrrtm4	protein_coding	leucine rich repeat transmembrane neuronal 4 [Source:MGI Symbol;Acc:MGI:2389180]	5.41517	1.53162e-08	1.20456e-06
Cadm1	protein_coding	cell adhesion molecule 1 [Source:MGI Symbol;Acc:MGI:1889272]	2.06651	1.60176e-08	1.25514e-06
Gm4660	processed_pseudogene	predicted gene 4660 [Source:MGI Symbol;Acc:MGI:3782842]	9.99946	1.61917e-08	1.26418e-06
Slitrk1	protein_coding	SLIT and NTRK-like family, member 1 [Source:MGI Symbol;Acc:MGI:2679446]	4.30411	1.63802e-08	1.27378e-06
Pard6g	protein_coding	par-6 family cell polarity regulator gamma [Source:MGI Symbol;Acc:MGI:2135606]	-3.96754	1.64329e-08	1.27378e-06
Ptk7	protein_coding	PTK7 protein tyrosine kinase 7 [Source:MGI Symbol;Acc:MGI:1918711]	-3.24242	1.69589e-08	1.30985e-06
Gm22146	lncRNA	predicted gene, 22146 [Source:MGI Symbol;Acc:MGI:5451923]	-9.76949	1.74291e-08	1.34136e-06
Dscaml1	protein_coding	DS cell adhesion molecule like 1 [Source:MGI Symbol;Acc:MGI:2150309]	4.83842	1.76304e-08	1.35202e-06
Zfp185	protein_coding	zinc finger protein 185 [Source:MGI Symbol;Acc:MGI:108095]	-24.1891	1.78944e-08	1.3674e-06
Lgr5	protein_coding	leucine rich repeat containing G protein coupled receptor 5 [Source:MGI Symbol;Acc:MGI:1341817]	8.75249	1.81253e-08	1.38015e-06
Trim46	protein_coding	tripartite motif-containing 46 [Source:MGI Symbol;Acc:MGI:2673000]	2.91734	1.85085e-08	1.40436e-06
A930003O13Rik	lncRNA	RIKEN cDNA A930003O13 gene [Source:MGI Symbol;Acc:MGI:3612704]	8.40284	1.89195e-08	1.43052e-06
Atp8a2	protein_coding	ATPase, aminophospholipid transporter-like, class I, type 8A, member 2 [Source:MGI Symbol;Acc:MGI:1354710]	4.06019	1.90129e-08	1.43255e-06
Erbb4	protein_coding	erb-b2 receptor tyrosine kinase 4 [Source:MGI Symbol;Acc:MGI:104771]	10.3836	1.92425e-08	1.4448e-06
Cadps	protein_coding	Ca2+-dependent secretion activator [Source:MGI Symbol;Acc:MGI:1350922]	3.4346	1.9346e-08	1.44753e-06
H2-Ab1	protein_coding	histocompatibility 2, class II antigen A, beta 1 [Source:MGI Symbol;Acc:MGI:103070]	-6.70715	1.97861e-08	1.47533e-06
Gm18956	processed_pseudogene	predicted gene, 18956 [Source:MGI Symbol;Acc:MGI:5011141]	7.65329	1.99835e-08	1.48491e-06
Gm43316	TEC	predicted gene 43316 [Source:MGI Symbol;Acc:MGI:5663453]	3.89425	2.05587e-08	1.5224e-06
Ank3	protein_coding	ankyrin 3, epithelial [Source:MGI Symbol;Acc:MGI:88026]	2.52959	2.10955e-08	1.55681e-06
Anks1b	protein_coding	ankyrin repeat and sterile alpha motif domain containing 1B [Source:MGI Symbol;Acc:MGI:1924781]	3.2262	2.21161e-08	1.62655e-06
2810433D01Rik	lncRNA	RIKEN cDNA 2810433D01 gene [Source:MGI Symbol;Acc:MGI:1924382]	-10.4678	2.31554e-08	1.6972e-06
Gm43318	TEC	predicted gene 43318 [Source:MGI Symbol;Acc:MGI:5663455]	4.11449	2.35274e-08	1.71862e-06
Erich3	protein_coding	glutamate rich 3 [Source:MGI Symbol;Acc:MGI:1919095]	4.59147	2.3754e-08	1.7293e-06
Camkk2	protein_coding	calcium/calmodulin-dependent protein kinase kinase 2, beta [Source:MGI Symbol;Acc:MGI:2444812]	1.92911	2.53573e-08	1.83981e-06
Efemp2	protein_coding	epidermal growth factor-containing fibulin-like extracellular matrix protein 2 [Source:MGI Symbol;Acc:MGI:1891209]	-3.58179	2.60198e-08	1.87554e-06
Atp1a3	protein_coding	ATPase, Na+/K+ transporting, alpha 3 polypeptide [Source:MGI Symbol;Acc:MGI:88107]	2.97994	2.6041e-08	1.87554e-06
Gria1	protein_coding	glutamate receptor, ionotropic, AMPA1 (alpha 1) [Source:MGI Symbol;Acc:MGI:95808]	3.10221	2.61108e-08	1.87554e-06
Marchf1	protein_coding	membrane associated ring-CH-type finger 1 [Source:MGI Symbol;Acc:MGI:1920175]	3.88743	2.65058e-08	1.89758e-06
Sepsecs	protein_coding	Sep (O-phosphoserine) tRNA:Sec (selenocysteine) tRNA synthase [Source:MGI Symbol;Acc:MGI:1098791]	-2.51241	2.679e-08	1.91158e-06
Gm47523	lncRNA	predicted gene, 47523 [Source:MGI Symbol;Acc:MGI:6096522]	7.16477	2.69896e-08	1.91947e-06
Gm37562	TEC	predicted gene, 37562 [Source:MGI Symbol;Acc:MGI:5610790]	9.89528	2.74604e-08	1.94653e-06
Dpp10	protein_coding	dipeptidylpeptidase 10 [Source:MGI Symbol;Acc:MGI:2442409]	3.89799	2.8571e-08	2.01202e-06
Gm38340	TEC	predicted gene, 38340 [Source:MGI Symbol;Acc:MGI:5611568]	3.50359	2.85711e-08	2.01202e-06
Cyp2f2	protein_coding	cytochrome P450, family 2, subfamily f, polypeptide 2 [Source:MGI Symbol;Acc:MGI:88608]	-24.449	2.905e-08	2.03908e-06
Shank2	protein_coding	SH3 and multiple ankyrin repeat domains 2 [Source:MGI Symbol;Acc:MGI:2671987]	2.78574	2.91835e-08	2.0418e-06
Morc2b	protein_coding	microrchidia 2B [Source:MGI Symbol;Acc:MGI:3045293]	4.01728	2.9529e-08	2.05929e-06
Ptgds	protein_coding	prostaglandin D2 synthase (brain) [Source:MGI Symbol;Acc:MGI:99261]	-6.15256	3.00505e-08	2.08706e-06
Best1	protein_coding	bestrophin 1 [Source:MGI Symbol;Acc:MGI:1346332]	-9.45722	3.01209e-08	2.08706e-06
Prkar1b	protein_coding	protein kinase, cAMP dependent regulatory, type I beta [Source:MGI Symbol;Acc:MGI:97759]	2.36935	3.02687e-08	2.09058e-06
Trank1	protein_coding	tetratricopeptide repeat and ankyrin repeat containing 1 [Source:MGI Symbol;Acc:MGI:1341834]	2.98437	3.0555e-08	2.10361e-06
Insl6	protein_coding	insulin-like 6 [Source:MGI Symbol;Acc:MGI:1351595]	-9.69124	3.10769e-08	2.13273e-06
Twsg1	protein_coding	twisted gastrulation BMP signaling modulator 1 [Source:MGI Symbol;Acc:MGI:2137520]	-2.67627	3.11949e-08	2.13403e-06
Slc7a10	protein_coding	solute carrier family 7 (cationic amino acid transporter, y+ system), member 10 [Source:MGI Symbol;Acc:MGI:1858261]	2.55566	3.23657e-08	2.20711e-06
Kcnip2	protein_coding	Kv channel-interacting protein 2 [Source:MGI Symbol;Acc:MGI:2135916]	3.48209	3.27631e-08	2.22717e-06
Nudt4	protein_coding	nudix hydrolase 4 [Source:MGI Symbol;Acc:MGI:1918457]	-2.63104	3.2867e-08	2.2272e-06
Cd74	protein_coding	CD74 antigen (invariant polypeptide of major histocompatibility complex, class II antigen-associated) [Source:MGI Symbol;Acc:MGI:96534]	-9.05352	3.38368e-08	2.28573e-06
2310075C17Rik	lncRNA	RIKEN cDNA 2310075C17 gene [Source:MGI Symbol;Acc:MGI:1917444]	8.32248	3.42566e-08	2.30686e-06
Gm32849	lncRNA	predicted gene, 32849 [Source:MGI Symbol;Acc:MGI:5592008]	7.18918	3.47262e-08	2.3312e-06
Cd300a	protein_coding	CD300A molecule [Source:MGI Symbol;Acc:MGI:2443411]	-9.31308	3.83759e-08	2.5682e-06
Eno2	protein_coding	enolase 2, gamma neuronal [Source:MGI Symbol;Acc:MGI:95394]	2.35226	4.02506e-08	2.68532e-06
Rarb	protein_coding	retinoic acid receptor, beta [Source:MGI Symbol;Acc:MGI:97857]	-4.12164	4.13527e-08	2.75034e-06
Qki	protein_coding	quaking, KH domain containing RNA binding [Source:MGI Symbol;Acc:MGI:97837]	1.27091	4.28789e-08	2.84307e-06
Rapgefl1	protein_coding	Rap guanine nucleotide exchange factor (GEF)-like 1 [Source:MGI Symbol;Acc:MGI:3611446]	3.87064	4.41185e-08	2.91629e-06
Svep1	protein_coding	sushi, von Willebrand factor type A, EGF and pentraxin domain containing 1 [Source:MGI Symbol;Acc:MGI:1928849]	-8.13469	4.63359e-08	3.05349e-06
Kcnh8	protein_coding	potassium voltage-gated channel, subfamily H (eag-related), member 8 [Source:MGI Symbol;Acc:MGI:2445160]	9.08966	4.76364e-08	3.12962e-06
Slitrk3	protein_coding	SLIT and NTRK-like family, member 3 [Source:MGI Symbol;Acc:MGI:2679447]	3.68718	4.8125e-08	3.15211e-06
Dlgap2	protein_coding	DLG associated protein 2 [Source:MGI Symbol;Acc:MGI:2443181]	3.40675	4.8373e-08	3.15876e-06
Cntn6	protein_coding	contactin 6 [Source:MGI Symbol;Acc:MGI:1858223]	6.28418	4.88151e-08	3.178e-06
Adarb2	protein_coding	adenosine deaminase, RNA-specific, B2 [Source:MGI Symbol;Acc:MGI:2151118]	4.04913	4.90265e-08	3.18214e-06
Stra6	protein_coding	stimulated by retinoic acid gene 6 [Source:MGI Symbol;Acc:MGI:107742]	-1.99639	4.92806e-08	3.18903e-06
Cdc14b	protein_coding	CDC14 cell division cycle 14B [Source:MGI Symbol;Acc:MGI:2441808]	2.18707	5.14089e-08	3.3168e-06
Plaat3	protein_coding	phospholipase A and acyltransferase 3 [Source:MGI Symbol;Acc:MGI:2179715]	-1.72893	5.17663e-08	3.32989e-06
Aatk	protein_coding	apoptosis-associated tyrosine kinase [Source:MGI Symbol;Acc:MGI:1197518]	3.12562	5.2208e-08	3.34831e-06
Kdelr3	protein_coding	KDEL (Lys-Asp-Glu-Leu) endoplasmic reticulum protein retention receptor 3 [Source:MGI Symbol;Acc:MGI:2145953]	-3.37835	5.6994e-08	3.6444e-06
Ptgr1	protein_coding	prostaglandin reductase 1 [Source:MGI Symbol;Acc:MGI:1914353]	-10.9355	6.07626e-08	3.87388e-06
Mcm4	protein_coding	minichromosome maintenance complex component 4 [Source:MGI Symbol;Acc:MGI:103199]	-2.19196	6.16958e-08	3.91144e-06
Ksr2	protein_coding	kinase suppressor of ras 2 [Source:MGI Symbol;Acc:MGI:3610315]	3.89463	6.17146e-08	3.91144e-06
Myt1	protein_coding	myelin transcription factor 1 [Source:MGI Symbol;Acc:MGI:1100535]	10.4908	6.25246e-08	3.95115e-06
Slc45a1	protein_coding	solute carrier family 45, member 1 [Source:MGI Symbol;Acc:MGI:2653235]	3.6108	6.30443e-08	3.97234e-06
Lipt2	protein_coding	lipoyl(octanoyl) transferase 2 (putative) [Source:MGI Symbol;Acc:MGI:1914414]	-8.76	6.44367e-08	4.04808e-06
Tenm2	protein_coding	teneurin transmembrane protein 2 [Source:MGI Symbol;Acc:MGI:1345184]	3.23256	6.4622e-08	4.04808e-06
Syt11	protein_coding	synaptotagmin XI [Source:MGI Symbol;Acc:MGI:1859547]	2.15409	6.68359e-08	4.17463e-06
Snx19	protein_coding	sorting nexin 19 [Source:MGI Symbol;Acc:MGI:1921581]	-1.73429	7.25952e-08	4.52126e-06
Dmxl2	protein_coding	Dmx-like 2 [Source:MGI Symbol;Acc:MGI:2444630]	2.46684	7.52128e-08	4.67078e-06
Bcl11a	protein_coding	BCL11 transcription factor A [Source:MGI Symbol;Acc:MGI:106190]	3.12176	7.66319e-08	4.73314e-06
Kti12	protein_coding	KTI12 homolog, chromatin associated [Source:MGI Symbol;Acc:MGI:1923547]	-2.15086	7.66562e-08	4.73314e-06
Kif3a	protein_coding	kinesin family member 3A [Source:MGI Symbol;Acc:MGI:107689]	2.16759	7.71843e-08	4.75213e-06
Grik2	protein_coding	glutamate receptor, ionotropic, kainate 2 (beta 2) [Source:MGI Symbol;Acc:MGI:95815]	3.70879	7.92129e-08	4.86313e-06
Gigyf2	protein_coding	GRB10 interacting GYF protein 2 [Source:MGI Symbol;Acc:MGI:2138584]	-1.85986	8.0673e-08	4.9387e-06
H2-Aa	protein_coding	histocompatibility 2, class II antigen A, alpha [Source:MGI Symbol;Acc:MGI:95895]	-6.01736	8.11002e-08	4.95079e-06
Mgat3	protein_coding	mannoside acetylglucosaminyltransferase 3 [Source:MGI Symbol;Acc:MGI:104532]	-3.11428	8.58726e-08	5.22731e-06
Fcho1	protein_coding	FCH domain only 1 [Source:MGI Symbol;Acc:MGI:1921265]	3.08373	8.84192e-08	5.35327e-06
Pcsk1	protein_coding	proprotein convertase subtilisin/kexin type 1 [Source:MGI Symbol;Acc:MGI:97511]	5.5221	8.84386e-08	5.35327e-06
Gm26653	lncRNA	predicted gene, 26653 [Source:MGI Symbol;Acc:MGI:5477147]	3.53609	9.10925e-08	5.4851e-06
Hyal1	protein_coding	hyaluronoglucosaminidase 1 [Source:MGI Symbol;Acc:MGI:96298]	-1.57035	9.13558e-08	5.4851e-06
9530080O11Rik	lncRNA	RIKEN cDNA 9530080O11 gene [Source:MGI Symbol;Acc:MGI:2441751]	5.1547	9.13802e-08	5.4851e-06
Rab27a	protein_coding	RAB27A, member RAS oncogene family [Source:MGI Symbol;Acc:MGI:1861441]	-3.36266	9.22098e-08	5.51952e-06
Slc17a7	protein_coding	solute carrier family 17 (sodium-dependent inorganic phosphate cotransporter), member 7 [Source:MGI Symbol;Acc:MGI:1920211]	3.02298	9.2764e-08	5.53731e-06
Pnma8c	protein_coding	PNMA family member 8C [Source:MGI Symbol;Acc:MGI:5625257]	4.02144	9.43921e-08	5.61424e-06
Npas4	protein_coding	neuronal PAS domain protein 4 [Source:MGI Symbol;Acc:MGI:2664186]	4.04408	9.45737e-08	5.61424e-06
Gm47472	TEC	predicted gene, 47472 [Source:MGI Symbol;Acc:MGI:6096442]	4.07082	9.5494e-08	5.65329e-06
A230103L15Rik	TEC	RIKEN cDNA A230103L15 gene [Source:MGI Symbol;Acc:MGI:1925005]	3.95599	9.69352e-08	5.70402e-06
Fam117a	protein_coding	family with sequence similarity 117, member A [Source:MGI Symbol;Acc:MGI:2144564]	-9.21316	9.71068e-08	5.70402e-06
St8sia3os	lncRNA	ST8 alpha-N-acetyl-neuraminide alpha-2,8-sialyltransferase 3, opposite strand [Source:MGI Symbol;Acc:MGI:1920838]	6.21224	9.71449e-08	5.70402e-06
Gm57307	lncRNA	predicted gene, 57307 [Source:MGI Symbol;Acc:MGI:7338527]	-5.21329	9.82956e-08	5.7559e-06
Insrr	protein_coding	insulin receptor-related receptor [Source:MGI Symbol;Acc:MGI:1346037]	-10.0384	1.03447e-07	6.04113e-06
Faim2	protein_coding	Fas apoptotic inhibitory molecule 2 [Source:MGI Symbol;Acc:MGI:1919643]	3.00592	1.08824e-07	6.33798e-06
Gdap1	protein_coding	ganglioside-induced differentiation-associated-protein 1 [Source:MGI Symbol;Acc:MGI:1338002]	4.09365	1.11623e-07	6.48344e-06
Pkib	protein_coding	protein kinase inhibitor beta, cAMP dependent, testis specific [Source:MGI Symbol;Acc:MGI:101937]	-9.03677	1.12482e-07	6.51579e-06
Lonrf3	protein_coding	LON peptidase N-terminal domain and ring finger 3 [Source:MGI Symbol;Acc:MGI:1921615]	-9.09529	1.15595e-07	6.67816e-06
Cacna1i	protein_coding	calcium channel, voltage-dependent, alpha 1I subunit [Source:MGI Symbol;Acc:MGI:2178051]	5.28326	1.17875e-07	6.79168e-06
9330162G02Rik	TEC	RIKEN cDNA 9330162G02 gene [Source:MGI Symbol;Acc:MGI:2442217]	2.94195	1.18535e-07	6.81149e-06
Kif7	protein_coding	kinesin family member 7 [Source:MGI Symbol;Acc:MGI:1098239]	-8.99611	1.20289e-07	6.88548e-06
Kcnj6	protein_coding	potassium inwardly-rectifying channel, subfamily J, member 6 [Source:MGI Symbol;Acc:MGI:104781]	5.64164	1.20462e-07	6.88548e-06
Gm38116	TEC	predicted gene, 38116 [Source:MGI Symbol;Acc:MGI:5611344]	2.96241	1.2343e-07	7.03355e-06
Lepr	protein_coding	leptin receptor [Source:MGI Symbol;Acc:MGI:104993]	-3.99875	1.23705e-07	7.03355e-06
Fam234b	protein_coding	family with sequence similarity 234, member B [Source:MGI Symbol;Acc:MGI:1921775]	2.33238	1.24685e-07	7.05899e-06
Adgrl3	protein_coding	adhesion G protein-coupled receptor L3 [Source:MGI Symbol;Acc:MGI:2441950]	2.96281	1.24807e-07	7.05899e-06
Elavl4	protein_coding	ELAV like RNA binding protein 4 [Source:MGI Symbol;Acc:MGI:107427]	4.54351	1.27769e-07	7.20756e-06
Slamf7	protein_coding	SLAM family member 7 [Source:MGI Symbol;Acc:MGI:1922595]	-21.3621	1.28351e-07	7.22153e-06
Snhg11	protein_coding	small nucleolar RNA host gene 11 [Source:MGI Symbol;Acc:MGI:2441845]	3.10496	1.32497e-07	7.43535e-06
Hhipl1	protein_coding	hedgehog interacting protein-like 1 [Source:MGI Symbol;Acc:MGI:1919265]	4.81205	1.33094e-07	7.44945e-06
Dlgap1	protein_coding	DLG associated protein 1 [Source:MGI Symbol;Acc:MGI:1346065]	2.62746	1.37492e-07	7.67501e-06
Gm43048	TEC	predicted gene 43048 [Source:MGI Symbol;Acc:MGI:5663185]	3.69333	1.37836e-07	7.67501e-06
Adamtsl5	protein_coding	ADAMTS-like 5 [Source:MGI Symbol;Acc:MGI:1913798]	-6.38541	1.44314e-07	8.01503e-06
Rab20	protein_coding	RAB20, member RAS oncogene family [Source:MGI Symbol;Acc:MGI:102789]	-8.94747	1.47376e-07	8.15766e-06
Tmco5	protein_coding	transmembrane and coiled-coil domains 5 [Source:MGI Symbol;Acc:MGI:1914606]	9.18873	1.4797e-07	8.15766e-06
Cilp2	protein_coding	cartilage intermediate layer protein 2 [Source:MGI Symbol;Acc:MGI:1915959]	-11.2891	1.48018e-07	8.15766e-06
Gm29214	processed_pseudogene	predicted gene 29214 [Source:MGI Symbol;Acc:MGI:5579920]	5.28556	1.4891e-07	8.18587e-06
Gm56756	lncRNA	predicted gene, 56756 [Source:MGI Symbol;Acc:MGI:7337425]	8.6732	1.50356e-07	8.2443e-06
Cck	protein_coding	cholecystokinin [Source:MGI Symbol;Acc:MGI:88297]	2.74264	1.54145e-07	8.43065e-06
Chsy3	protein_coding	chondroitin sulfate synthase 3 [Source:MGI Symbol;Acc:MGI:1926173]	3.57015	1.54989e-07	8.45536e-06
Epha10	protein_coding	Eph receptor A10 [Source:MGI Symbol;Acc:MGI:3586824]	3.7721	1.5868e-07	8.63486e-06
Tmem59l	protein_coding	transmembrane protein 59-like [Source:MGI Symbol;Acc:MGI:1915187]	3.63682	1.59413e-07	8.65288e-06
Cntn3	protein_coding	contactin 3 [Source:MGI Symbol;Acc:MGI:99534]	6.04847	1.61009e-07	8.71754e-06
Gm44678	TEC	predicted gene 44678 [Source:MGI Symbol;Acc:MGI:5753254]	5.04595	1.61832e-07	8.74015e-06
AI593442	protein_coding	expressed sequence AI593442 [Source:MGI Symbol;Acc:MGI:2143099]	4.30641	1.69106e-07	9.10837e-06
Prkcb	protein_coding	protein kinase C, beta [Source:MGI Symbol;Acc:MGI:97596]	1.85103	1.69495e-07	9.10837e-06
Csmd3	protein_coding	CUB and Sushi multiple domains 3 [Source:MGI Symbol;Acc:MGI:2386403]	3.66612	1.7041e-07	9.13476e-06
Scn2a	protein_coding	sodium channel, voltage-gated, type II, alpha [Source:MGI Symbol;Acc:MGI:98248]	3.05008	1.72139e-07	9.20454e-06
Gm43487	TEC	predicted gene 43487 [Source:MGI Symbol;Acc:MGI:5663624]	4.6966	1.73467e-07	9.25256e-06
Gm37331	TEC	predicted gene, 37331 [Source:MGI Symbol;Acc:MGI:5610559]	5.13887	1.74432e-07	9.28108e-06
Folr2	protein_coding	folate receptor beta [Source:MGI Symbol;Acc:MGI:95569]	-9.72482	1.78256e-07	9.46117e-06
Ly6h	protein_coding	lymphocyte antigen 6 family member H [Source:MGI Symbol;Acc:MGI:1346030]	2.53017	1.78861e-07	9.46998e-06
Krt19	protein_coding	keratin 19 [Source:MGI Symbol;Acc:MGI:96693]	-23.0061	1.79571e-07	9.48428e-06
Sst	protein_coding	somatostatin [Source:MGI Symbol;Acc:MGI:98326]	3.32893	1.81573e-07	9.56653e-06
Cpne6	protein_coding	copine VI [Source:MGI Symbol;Acc:MGI:1334445]	2.55446	1.88144e-07	9.88857e-06
Gfra2	protein_coding	glial cell line derived neurotrophic factor family receptor alpha 2 [Source:MGI Symbol;Acc:MGI:1195462]	1.84108	1.88899e-07	9.89117e-06
Fat3	protein_coding	FAT atypical cadherin 3 [Source:MGI Symbol;Acc:MGI:2444314]	3.32157	1.89112e-07	9.89117e-06
Frmpd3	protein_coding	FERM and PDZ domain containing 3 [Source:MGI Symbol;Acc:MGI:3646547]	10.2095	1.90529e-07	9.94121e-06
Elfn1	protein_coding	leucine rich repeat and fibronectin type III, extracellular 1 [Source:MGI Symbol;Acc:MGI:2442479]	7.64579	1.94292e-07	1.0113e-05
Gm37773	TEC	predicted gene, 37773 [Source:MGI Symbol;Acc:MGI:5611001]	8.45575	1.98336e-07	1.02986e-05
Sv2b	protein_coding	synaptic vesicle glycoprotein 2b [Source:MGI Symbol;Acc:MGI:1927338]	3.57218	2.01728e-07	1.04496e-05
Tmem205	protein_coding	transmembrane protein 205 [Source:MGI Symbol;Acc:MGI:3045495]	-1.72007	2.12938e-07	1.10039e-05
Rabac1	protein_coding	Rab acceptor 1 (prenylated) [Source:MGI Symbol;Acc:MGI:1201692]	-1.37221	2.1499e-07	1.10833e-05
Gm42448	TEC	predicted gene 42448 [Source:MGI Symbol;Acc:MGI:5662585]	5.1443	2.15887e-07	1.10956e-05
Tmem62	protein_coding	transmembrane protein 62 [Source:MGI Symbol;Acc:MGI:2139461]	2.2697	2.16258e-07	1.10956e-05
Mapkap1	protein_coding	mitogen-activated protein kinase associated protein 1 [Source:MGI Symbol;Acc:MGI:2444554]	-1.90429	2.21153e-07	1.13198e-05
Igsf5	protein_coding	immunoglobulin superfamily, member 5 [Source:MGI Symbol;Acc:MGI:1919308]	-4.52598	2.23572e-07	1.14165e-05
Gm37364	TEC	predicted gene, 37364 [Source:MGI Symbol;Acc:MGI:5610592]	-20.9341	2.27277e-07	1.15783e-05
Mir124a-1hg	lncRNA	Mir124-1 host gene (non-protein coding) [Source:MGI Symbol;Acc:MGI:2442197]	3.65025	2.2803e-07	1.15892e-05
Gm37673	TEC	predicted gene, 37673 [Source:MGI Symbol;Acc:MGI:5610901]	6.56145	2.35262e-07	1.19286e-05
Foxg1	protein_coding	forkhead box G1 [Source:MGI Symbol;Acc:MGI:1347464]	3.08239	2.37194e-07	1.19983e-05
Cfh	protein_coding	complement component factor h [Source:MGI Symbol;Acc:MGI:88385]	-2.69396	2.40318e-07	1.21279e-05
Lhfpl4	protein_coding	lipoma HMGIC fusion partner-like protein 4 [Source:MGI Symbol;Acc:MGI:3057108]	2.43991	2.44397e-07	1.23049e-05
F13a1	protein_coding	coagulation factor XIII, A1 subunit [Source:MGI Symbol;Acc:MGI:1921395]	-3.18139	2.59187e-07	1.30192e-05
Dock3	protein_coding	dedicator of cyto-kinesis 3 [Source:MGI Symbol;Acc:MGI:2429763]	3.42963	2.59814e-07	1.30203e-05
Gm44822	TEC	predicted gene 44822 [Source:MGI Symbol;Acc:MGI:5753398]	-20.8285	2.63683e-07	1.3162e-05
Il6st	protein_coding	interleukin 6 signal transducer [Source:MGI Symbol;Acc:MGI:96560]	-2.181	2.63863e-07	1.3162e-05
Nt5e	protein_coding	5' nucleotidase, ecto [Source:MGI Symbol;Acc:MGI:99782]	-4.31494	2.65849e-07	1.32305e-05
Bmp15	protein_coding	bone morphogenetic protein 15 [Source:MGI Symbol;Acc:MGI:1316745]	-10.426	2.66884e-07	1.32514e-05
Atp2b2	protein_coding	ATPase, Ca++ transporting, plasma membrane 2 [Source:MGI Symbol;Acc:MGI:105368]	2.83407	2.80873e-07	1.38976e-05
Gm37735	TEC	predicted gene, 37735 [Source:MGI Symbol;Acc:MGI:5610963]	8.59037	2.81189e-07	1.38976e-05
Ptprd	protein_coding	protein tyrosine phosphatase receptor type D [Source:MGI Symbol;Acc:MGI:97812]	2.98283	2.84967e-07	1.40521e-05
Cmbl	protein_coding	carboxymethylenebutenolidase homolog [Source:MGI Symbol;Acc:MGI:1916824]	-3.57537	2.87949e-07	1.41667e-05
Rbbp7	protein_coding	retinoblastoma binding protein 7, chromatin remodeling factor [Source:MGI Symbol;Acc:MGI:1194910]	-1.94157	2.95742e-07	1.4517e-05
Paox	protein_coding	polyamine oxidase (exo-N4-amino) [Source:MGI Symbol;Acc:MGI:1916983]	-3.00831	2.98436e-07	1.46159e-05
Cldn11	protein_coding	claudin 11 [Source:MGI Symbol;Acc:MGI:106925]	-4.69955	2.9955e-07	1.46372e-05
Sphkap	protein_coding	SPHK1 interactor, AKAP domain containing [Source:MGI Symbol;Acc:MGI:1924879]	3.36301	3.03184e-07	1.47808e-05
Mtag2	lncRNA	metastasis associated gene 2 [Source:MGI Symbol;Acc:MGI:1860766]	5.8623	3.03862e-07	1.47808e-05
B4galnt1	protein_coding	beta-1,4-N-acetyl-galactosaminyl transferase 1 [Source:MGI Symbol;Acc:MGI:1342057]	1.7477	3.07464e-07	1.49224e-05
Gm10862	lncRNA	predicted gene 10862 [Source:MGI Symbol;Acc:MGI:3641622]	3.30744	3.09694e-07	1.49742e-05
Gpc4	protein_coding	glypican 4 [Source:MGI Symbol;Acc:MGI:104902]	-5.10628	3.09921e-07	1.49742e-05
Zfp119b	protein_coding	zinc finger protein 119b [Source:MGI Symbol;Acc:MGI:2385323]	-5.05887	3.15175e-07	1.5194e-05
Enpp2	protein_coding	ectonucleotide pyrophosphatase/phosphodiesterase 2 [Source:MGI Symbol;Acc:MGI:1321390]	-2.58262	3.169e-07	1.5243e-05
Sult1a1	protein_coding	sulfotransferase family 1A, phenol-preferring, member 1 [Source:MGI Symbol;Acc:MGI:102896]	-2.38392	3.19523e-07	1.53179e-05
Gm44831	TEC	predicted gene 44831 [Source:MGI Symbol;Acc:MGI:5753407]	4.54665	3.19879e-07	1.53179e-05
Cdk5r1	protein_coding	cyclin dependent kinase 5, regulatory subunit 1 [Source:MGI Symbol;Acc:MGI:101764]	3.12792	3.28927e-07	1.57163e-05
Rxfp1	protein_coding	relaxin/insulin-like family peptide receptor 1 [Source:MGI Symbol;Acc:MGI:2682211]	3.97502	3.30359e-07	1.57498e-05
Camkv	protein_coding	CaM kinase-like vesicle-associated [Source:MGI Symbol;Acc:MGI:2384296]	2.65286	3.34527e-07	1.59133e-05
Jph1	protein_coding	junctophilin 1 [Source:MGI Symbol;Acc:MGI:1891495]	3.18237	3.37691e-07	1.60258e-05
Itm2c	protein_coding	integral membrane protein 2C [Source:MGI Symbol;Acc:MGI:1927594]	-1.81967	3.38379e-07	1.60258e-05
Mapt	protein_coding	microtubule-associated protein tau [Source:MGI Symbol;Acc:MGI:97180]	2.67423	3.41421e-07	1.61344e-05
Ptk2b	protein_coding	PTK2 protein tyrosine kinase 2 beta [Source:MGI Symbol;Acc:MGI:104908]	1.88616	3.42877e-07	1.61677e-05
Gm44562	TEC	predicted gene 44562 [Source:MGI Symbol;Acc:MGI:5753138]	3.60158	3.46552e-07	1.62755e-05
9630013A20Rik	lncRNA	RIKEN cDNA 9630013A20 gene [Source:MGI Symbol;Acc:MGI:2442953]	6.26257	3.46673e-07	1.62755e-05
Tubd1	protein_coding	tubulin, delta 1 [Source:MGI Symbol;Acc:MGI:1891826]	-2.39095	3.52707e-07	1.64964e-05
B4galnt4	protein_coding	beta-1,4-N-acetyl-galactosaminyl transferase 4 [Source:MGI Symbol;Acc:MGI:2652891]	2.43296	3.52909e-07	1.64964e-05
Pcdh10	protein_coding	protocadherin 10 [Source:MGI Symbol;Acc:MGI:1338042]	2.45345	3.58047e-07	1.67003e-05
Gm12592	lncRNA	predicted gene 12592 [Source:MGI Symbol;Acc:MGI:3649892]	-1.28047	3.62808e-07	1.68859e-05
Ralgps1	protein_coding	Ral GEF with PH domain and SH3 binding motif 1 [Source:MGI Symbol;Acc:MGI:1922008]	2.85455	3.64767e-07	1.69341e-05
Cacna1a	protein_coding	calcium channel, voltage-dependent, P/Q type, alpha 1A subunit [Source:MGI Symbol;Acc:MGI:109482]	2.61885	3.65416e-07	1.69341e-05
Chn1	protein_coding	chimerin 1 [Source:MGI Symbol;Acc:MGI:1915674]	2.41315	3.71692e-07	1.7188e-05
Nxph4	protein_coding	neurexophilin 4 [Source:MGI Symbol;Acc:MGI:1336197]	-9.51154	3.72899e-07	1.72068e-05
Acss3	protein_coding	acyl-CoA synthetase short-chain family member 3 [Source:MGI Symbol;Acc:MGI:2685720]	-10.4233	3.76331e-07	1.73264e-05
Gm10399	lncRNA	predicted gene 10399 [Source:MGI Symbol;Acc:MGI:3704255]	-8.89937	3.77097e-07	1.73264e-05
Gm32710	lncRNA	predicted gene, 32710 [Source:MGI Symbol;Acc:MGI:5591869]	5.41562	3.81715e-07	1.75012e-05
Gm48904	TEC	predicted gene, 48904 [Source:MGI Symbol;Acc:MGI:6098675]	9.12525	3.86168e-07	1.76678e-05
Slc16a3	protein_coding	solute carrier family 16 (monocarboxylic acid transporters), member 3 [Source:MGI Symbol;Acc:MGI:1933438]	-8.41407	3.92138e-07	1.79029e-05
Gm6377	protein_coding	predicted gene 6377 [Source:MGI Symbol;Acc:MGI:3647255]	-21.4295	3.98771e-07	1.81673e-05
Rasgrp1	protein_coding	RAS guanyl releasing protein 1 [Source:MGI Symbol;Acc:MGI:1314635]	2.88158	4.16138e-07	1.89185e-05
Angptl2	protein_coding	angiopoietin-like 2 [Source:MGI Symbol;Acc:MGI:1347002]	-5.11792	4.19693e-07	1.90399e-05
Ppp3ca	protein_coding	protein phosphatase 3, catalytic subunit, alpha isoform [Source:MGI Symbol;Acc:MGI:107164]	1.52945	4.20851e-07	1.90524e-05
Pals2	protein_coding	protein associated with LIN7 2, MAGUK family member [Source:MGI Symbol;Acc:MGI:1927340]	-2.12313	4.24135e-07	1.91608e-05
BC030500	protein_coding	cDNA sequence BC030500 [Source:MGI Symbol;Acc:MGI:2447770]	7.83147	4.29219e-07	1.93499e-05
Ms4a6b	protein_coding	membrane-spanning 4-domains, subfamily A, member 6B [Source:MGI Symbol;Acc:MGI:1917024]	-3.19951	4.41453e-07	1.98598e-05
Poll	protein_coding	polymerase (DNA directed), lambda [Source:MGI Symbol;Acc:MGI:1889000]	-3.1033	4.85692e-07	2.17918e-05
Chn1os3	lncRNA	chimerin 1, opposite strand 3 [Source:MGI Symbol;Acc:MGI:3705094]	2.62706	4.86419e-07	2.17918e-05
Kalrn	protein_coding	kalirin, RhoGEF kinase [Source:MGI Symbol;Acc:MGI:2685385]	2.9834	4.88739e-07	2.18503e-05
Cntn1	protein_coding	contactin 1 [Source:MGI Symbol;Acc:MGI:105980]	3.42944	4.98132e-07	2.22241e-05
Ap5b1	protein_coding	adaptor-related protein complex 5, beta 1 subunit [Source:MGI Symbol;Acc:MGI:2685808]	-9.266	4.99248e-07	2.22279e-05
Orai2	protein_coding	ORAI calcium release-activated calcium modulator 2 [Source:MGI Symbol;Acc:MGI:2443195]	3.32514	5.1042e-07	2.26784e-05
Gm38073	TEC	predicted gene, 38073 [Source:MGI Symbol;Acc:MGI:5611301]	4.0744	5.14493e-07	2.28124e-05
Ufsp1	protein_coding	UFM1-specific peptidase 1 [Source:MGI Symbol;Acc:MGI:1917490]	-8.05691	5.1831e-07	2.29344e-05
Cacng5	protein_coding	calcium channel, voltage-dependent, gamma subunit 5 [Source:MGI Symbol;Acc:MGI:2157946]	7.65277	5.37665e-07	2.37421e-05
Gm3510	lncRNA	predicted gene 3510 [Source:MGI Symbol;Acc:MGI:3781687]	6.89404	5.50231e-07	2.42408e-05
Pgm2l1	protein_coding	phosphoglucomutase 2-like 1 [Source:MGI Symbol;Acc:MGI:1918224]	2.1868	5.51209e-07	2.42408e-05
Arhgdib	protein_coding	Rho, GDP dissociation inhibitor beta [Source:MGI Symbol;Acc:MGI:101940]	-1.85049	5.59537e-07	2.4557e-05
Lancl3	protein_coding	LanC lantibiotic synthetase component C-like 3 (bacterial) [Source:MGI Symbol;Acc:MGI:2443335]	-22.0419	5.73233e-07	2.51069e-05
Piezo2	protein_coding	piezo-type mechanosensitive ion channel component 2 [Source:MGI Symbol;Acc:MGI:1918781]	-9.57419	5.75396e-07	2.5123e-05
4930538E20Rik	lncRNA	RIKEN cDNA 4930538E20 gene [Source:MGI Symbol;Acc:MGI:1925450]	3.40739	5.75931e-07	2.5123e-05
Unc13a	protein_coding	unc-13 homolog A [Source:MGI Symbol;Acc:MGI:3051532]	2.20667	5.80522e-07	2.52721e-05
Vwa5b2	protein_coding	von Willebrand factor A domain containing 5B2 [Source:MGI Symbol;Acc:MGI:2681859]	3.45345	5.83915e-07	2.53685e-05
Baiap2	protein_coding	brain-specific angiogenesis inhibitor 1-associated protein 2 [Source:MGI Symbol;Acc:MGI:2137336]	1.84654	5.87153e-07	2.54579e-05
Hdac11	protein_coding	histone deacetylase 11 [Source:MGI Symbol;Acc:MGI:2385252]	1.91948	5.90116e-07	2.55349e-05
Cpne7	protein_coding	copine VII [Source:MGI Symbol;Acc:MGI:2142747]	4.11099	5.97778e-07	2.58147e-05
Ripor3	protein_coding	RIPOR family member 3 [Source:MGI Symbol;Acc:MGI:1916803]	-9.96497	6.03112e-07	2.59929e-05
Cbln2	protein_coding	cerebellin 2 precursor protein [Source:MGI Symbol;Acc:MGI:88282]	3.46046	6.1705e-07	2.65405e-05
Gpx8	protein_coding	glutathione peroxidase 8 (putative) [Source:MGI Symbol;Acc:MGI:1916840]	-3.9367	6.22942e-07	2.67406e-05
Camk2b	protein_coding	calcium/calmodulin-dependent protein kinase II, beta [Source:MGI Symbol;Acc:MGI:88257]	2.34297	6.38488e-07	2.73534e-05
Gm42919	TEC	predicted gene 42919 [Source:MGI Symbol;Acc:MGI:5663056]	3.52785	6.47239e-07	2.76733e-05
Car14	protein_coding	carbonic anhydrase 14 [Source:MGI Symbol;Acc:MGI:1344341]	-3.95883	6.63056e-07	2.82935e-05
Mpped1	protein_coding	metallophosphoesterase domain containing 1 [Source:MGI Symbol;Acc:MGI:106316]	2.56071	6.76959e-07	2.88296e-05
Tgfbr3	protein_coding	transforming growth factor, beta receptor III [Source:MGI Symbol;Acc:MGI:104637]	-2.6028	6.86805e-07	2.91912e-05
Igsf9b	protein_coding	immunoglobulin superfamily, member 9B [Source:MGI Symbol;Acc:MGI:2685354]	2.938	6.89547e-07	2.92184e-05
Itgbl1	protein_coding	integrin, beta-like 1 [Source:MGI Symbol;Acc:MGI:2443439]	-5.56169	6.90873e-07	2.92184e-05
Nupr1	protein_coding	nuclear protein transcription regulator 1 [Source:MGI Symbol;Acc:MGI:1891834]	-2.20271	6.91511e-07	2.92184e-05
Cd79a	protein_coding	CD79A antigen (immunoglobulin-associated alpha) [Source:MGI Symbol;Acc:MGI:101774]	-6.59336	6.95211e-07	2.93172e-05
Ms4a6c	protein_coding	membrane-spanning 4-domains, subfamily A, member 6C [Source:MGI Symbol;Acc:MGI:2385644]	-4.70387	7.48599e-07	3.1507e-05
Fsd1l	protein_coding	fibronectin type III and SPRY domain containing 1-like [Source:MGI Symbol;Acc:MGI:2442443]	2.06871	7.54795e-07	3.17058e-05
Anxa2	protein_coding	annexin A2 [Source:MGI Symbol;Acc:MGI:88246]	-2.21056	7.6069e-07	3.18913e-05
Rap1gap	protein_coding	Rap1 GTPase-activating protein [Source:MGI Symbol;Acc:MGI:109338]	3.08792	7.94537e-07	3.32456e-05
Gm6297	lncRNA	predicted gene 6297 [Source:MGI Symbol;Acc:MGI:3779584]	-8.26625	7.96933e-07	3.32812e-05
Hpca	protein_coding	hippocalcin [Source:MGI Symbol;Acc:MGI:1336200]	2.53623	8.04496e-07	3.35321e-05
Parp6	protein_coding	poly (ADP-ribose) polymerase family, member 6 [Source:MGI Symbol;Acc:MGI:1914537]	1.70441	8.06618e-07	3.35556e-05
Ndrg4	protein_coding	N-myc downstream regulated gene 4 [Source:MGI Symbol;Acc:MGI:2384590]	2.61294	8.19537e-07	3.40274e-05
1700003E16Rik	protein_coding	RIKEN cDNA 1700003E16 gene [Source:MGI Symbol;Acc:MGI:1919087]	3.28369	8.51898e-07	3.5303e-05
Sorcs3	protein_coding	sortilin-related VPS10 domain containing receptor 3 [Source:MGI Symbol;Acc:MGI:1913923]	4.04933	8.6453e-07	3.57577e-05
Ctsl	protein_coding	cathepsin L [Source:MGI Symbol;Acc:MGI:88564]	-1.60164	8.75636e-07	3.61476e-05
Srsf5	protein_coding	serine and arginine-rich splicing factor 5 [Source:MGI Symbol;Acc:MGI:98287]	-0.926738	9.03406e-07	3.72227e-05
Gm56971	lncRNA	predicted gene, 56971 [Source:MGI Symbol;Acc:MGI:7337855]	3.15468	9.16189e-07	3.76774e-05
Gm57038	lncRNA	predicted gene, 57038 [Source:MGI Symbol;Acc:MGI:7337989]	2.6262	9.2283e-07	3.78782e-05
Napb	protein_coding	N-ethylmaleimide sensitive fusion protein attachment protein beta [Source:MGI Symbol;Acc:MGI:104562]	2.34159	9.4604e-07	3.87571e-05
Gm43872	TEC	predicted gene, 43872 [Source:MGI Symbol;Acc:MGI:5690264]	9.48622	9.50737e-07	3.88282e-05
Cops9	protein_coding	COP9 signalosome subunit 9 [Source:MGI Symbol;Acc:MGI:1914165]	1.42254	9.51379e-07	3.88282e-05
Kcnq5	protein_coding	potassium voltage-gated channel, subfamily Q, member 5 [Source:MGI Symbol;Acc:MGI:1924937]	4.18952	9.77153e-07	3.98047e-05
Gm57228	lncRNA	predicted gene, 57228 [Source:MGI Symbol;Acc:MGI:7338369]	3.30218	1.00013e-06	4.06637e-05
Gm56681	lncRNA	predicted gene, 56681 [Source:MGI Symbol;Acc:MGI:7337276]	8.70542	1.00399e-06	4.07437e-05
A530083M17Rik	TEC	RIKEN cDNA A530083M17 gene [Source:MGI Symbol;Acc:MGI:2444172]	2.18381	1.03095e-06	4.17595e-05
Lrrc4b	protein_coding	leucine rich repeat containing 4B [Source:MGI Symbol;Acc:MGI:3027390]	3.19873	1.03646e-06	4.18937e-05
Chd5	protein_coding	chromodomain helicase DNA binding protein 5 [Source:MGI Symbol;Acc:MGI:3036258]	2.76164	1.03816e-06	4.18937e-05
Myoc	protein_coding	myocilin [Source:MGI Symbol;Acc:MGI:1202864]	-13.2658	1.04384e-06	4.20442e-05
Btg3	protein_coding	BTG anti-proliferation factor 3 [Source:MGI Symbol;Acc:MGI:109532]	-2.5736	1.05311e-06	4.23385e-05
Pcsk2	protein_coding	proprotein convertase subtilisin/kexin type 2 [Source:MGI Symbol;Acc:MGI:97512]	3.1149	1.07573e-06	4.31676e-05
Schip1	protein_coding	schwannomin interacting protein 1 [Source:MGI Symbol;Acc:MGI:1353557]	2.23396	1.08585e-06	4.34926e-05
Gm5089	lncRNA	predicted gene 5089 [Source:MGI Symbol;Acc:MGI:3644731]	-10.3816	1.08793e-06	4.34949e-05
Fbln1	protein_coding	fibulin 1 [Source:MGI Symbol;Acc:MGI:95487]	-4.01436	1.10375e-06	4.40459e-05
Prr16	protein_coding	proline rich 16 [Source:MGI Symbol;Acc:MGI:1918623]	8.34778	1.10785e-06	4.40506e-05
Arnt2	protein_coding	aryl hydrocarbon receptor nuclear translocator 2 [Source:MGI Symbol;Acc:MGI:107188]	1.30979	1.10796e-06	4.40506e-05
Bicc1	protein_coding	BicC family RNA binding protein 1 [Source:MGI Symbol;Acc:MGI:1933388]	-2.80686	1.11627e-06	4.42994e-05
Skap2	protein_coding	src family associated phosphoprotein 2 [Source:MGI Symbol;Acc:MGI:1889206]	-1.76939	1.1347e-06	4.4948e-05
Cnr1	protein_coding	cannabinoid receptor 1 [Source:MGI Symbol;Acc:MGI:104615]	3.4448	1.14214e-06	4.51597e-05
Lypd2	protein_coding	Ly6/Plaur domain containing 2 [Source:MGI Symbol;Acc:MGI:1915561]	-9.93736	1.15906e-06	4.57447e-05
Srrm4os	lncRNA	serine/arginine repetitive matrix 4, opposite strand [Source:MGI Symbol;Acc:MGI:1924048]	5.03377	1.16227e-06	4.57875e-05
Scn8a	protein_coding	sodium channel, voltage-gated, type VIII, alpha [Source:MGI Symbol;Acc:MGI:103169]	2.82658	1.18101e-06	4.64407e-05
Dock2	protein_coding	dedicator of cyto-kinesis 2 [Source:MGI Symbol;Acc:MGI:2149010]	-5.8557	1.19543e-06	4.69223e-05
Gm44090	TEC	predicted gene, 44090 [Source:MGI Symbol;Acc:MGI:5690482]	4.5869	1.22594e-06	4.80324e-05
Fgfr1	protein_coding	fibroblast growth factor receptor 1 [Source:MGI Symbol;Acc:MGI:95522]	-2.08866	1.25751e-06	4.918e-05
Gm37181	TEC	predicted gene, 37181 [Source:MGI Symbol;Acc:MGI:5610409]	5.50144	1.28405e-06	5.01269e-05
Kcnh3	protein_coding	potassium voltage-gated channel, subfamily H (eag-related), member 3 [Source:MGI Symbol;Acc:MGI:1341723]	2.71899	1.34643e-06	5.24668e-05
Gm37211	TEC	predicted gene, 37211 [Source:MGI Symbol;Acc:MGI:5610439]	3.29159	1.35826e-06	5.28325e-05
Grtp1	protein_coding	GH regulated TBC protein 1 [Source:MGI Symbol;Acc:MGI:1914040]	-1.66502	1.39102e-06	5.4009e-05
Tubg2	protein_coding	tubulin, gamma 2 [Source:MGI Symbol;Acc:MGI:2144208]	2.88171	1.39709e-06	5.41474e-05
Scn2b	protein_coding	sodium channel, voltage-gated, type II, beta [Source:MGI Symbol;Acc:MGI:106921]	2.23153	1.45925e-06	5.64551e-05
Cntn5	protein_coding	contactin 5 [Source:MGI Symbol;Acc:MGI:3042287]	4.68585	1.49558e-06	5.77566e-05
Tm6sf2	protein_coding	transmembrane 6 superfamily member 2 [Source:MGI Symbol;Acc:MGI:1933210]	-4.55013	1.53398e-06	5.90921e-05
Abhd14b	protein_coding	abhydrolase domain containing 14b [Source:MGI Symbol;Acc:MGI:1923741]	-1.65282	1.53564e-06	5.90921e-05
Meg3	lncRNA	maternally expressed 3 [Source:MGI Symbol;Acc:MGI:1202886]	3.22026	1.56061e-06	5.99459e-05
2900064K03Rik	TEC	RIKEN cDNA 2900064K03 gene [Source:MGI Symbol;Acc:MGI:1920226]	3.70834	1.56941e-06	6.01767e-05
Gm37407	TEC	predicted gene, 37407 [Source:MGI Symbol;Acc:MGI:5610635]	3.63625	1.59613e-06	6.10922e-05
Tfcp2l1	protein_coding	transcription factor CP2-like 1 [Source:MGI Symbol;Acc:MGI:2444691]	-4.56032	1.60614e-06	6.13666e-05
Gm47405	lncRNA	predicted gene, 47405 [Source:MGI Symbol;Acc:MGI:6096336]	4.65395	1.64225e-06	6.26107e-05
C1qtnf2	protein_coding	C1q and tumor necrosis factor related protein 2 [Source:MGI Symbol;Acc:MGI:1916433]	-5.6996	1.64451e-06	6.26107e-05
Fut9	protein_coding	fucosyltransferase 9 [Source:MGI Symbol;Acc:MGI:1330859]	3.12382	1.65226e-06	6.27945e-05
Pcdh9	protein_coding	protocadherin 9 [Source:MGI Symbol;Acc:MGI:1306801]	2.56241	1.66192e-06	6.30506e-05
Gm27000	lncRNA	predicted gene, 27000 [Source:MGI Symbol;Acc:MGI:5504115]	4.72158	1.69171e-06	6.40678e-05
Gm44894	TEC	predicted gene 44894 [Source:MGI Symbol;Acc:MGI:5753470]	6.15217	1.72831e-06	6.53391e-05
Pgrmc1	protein_coding	progesterone receptor membrane component 1 [Source:MGI Symbol;Acc:MGI:1858305]	-2.44797	1.7328e-06	6.53941e-05
Gm49783	TEC	predicted gene, 49783 [Source:MGI Symbol;Acc:MGI:6215303]	-4.66618	1.73824e-06	6.54148e-05
Gm37124	TEC	predicted gene, 37124 [Source:MGI Symbol;Acc:MGI:5610352]	3.22403	1.73942e-06	6.54148e-05
Itpr1	protein_coding	inositol 1,4,5-trisphosphate receptor 1 [Source:MGI Symbol;Acc:MGI:96623]	0.938228	1.76551e-06	6.62805e-05
Chrm2	protein_coding	cholinergic receptor, muscarinic 2, cardiac [Source:MGI Symbol;Acc:MGI:88397]	8.25714	1.77452e-06	6.65029e-05
Tmem121b	protein_coding	transmembrane protein 121B [Source:MGI Symbol;Acc:MGI:2136977]	6.04214	1.80083e-06	6.73717e-05
Gm38260	TEC	predicted gene, 38260 [Source:MGI Symbol;Acc:MGI:5611488]	2.84194	1.8143e-06	6.77579e-05
Slc35g1	protein_coding	solute carrier family 35, member G1 [Source:MGI Symbol;Acc:MGI:2444789]	-7.69551	1.85171e-06	6.90353e-05
Gad1	protein_coding	glutamate decarboxylase 1 [Source:MGI Symbol;Acc:MGI:95632]	2.56316	1.8613e-06	6.9273e-05
B230209E15Rik	lncRNA	RIKEN cDNA B230209E15 gene [Source:MGI Symbol;Acc:MGI:2442668]	3.44896	1.86508e-06	6.92941e-05
Kcnab3	protein_coding	potassium voltage-gated channel, shaker-related subfamily, beta member 3 [Source:MGI Symbol;Acc:MGI:1336208]	5.14091	1.88111e-06	6.97693e-05
Gnasas1	lncRNA	GNAS antisense RNA 1 [Source:MGI Symbol;Acc:MGI:1861674]	-9.76358	1.88884e-06	6.99358e-05
Gm37396	TEC	predicted gene, 37396 [Source:MGI Symbol;Acc:MGI:5610624]	4.33879	1.92394e-06	7.1113e-05
5330431K02Rik	TEC	RIKEN cDNA 5330431K02 gene [Source:MGI Symbol;Acc:MGI:1915439]	3.48564	1.94391e-06	7.17283e-05
Rassf10	protein_coding	Ras association (RalGDS/AF-6) domain family (N-terminal) member 10 [Source:MGI Symbol;Acc:MGI:1925998]	-10.2185	1.95082e-06	7.186e-05
Mmd	protein_coding	monocyte to macrophage differentiation-associated [Source:MGI Symbol;Acc:MGI:1914718]	1.45808	1.95562e-06	7.19142e-05
Dnpep	protein_coding	aspartyl aminopeptidase [Source:MGI Symbol;Acc:MGI:1278328]	-1.00552	1.97688e-06	7.25719e-05
Slc41a1	protein_coding	solute carrier family 41, member 1 [Source:MGI Symbol;Acc:MGI:2444823]	-2.38592	1.99069e-06	7.2952e-05
Kctd4	protein_coding	potassium channel tetramerisation domain containing 4 [Source:MGI Symbol;Acc:MGI:1914766]	2.96618	1.994e-06	7.2952e-05
Renbp	protein_coding	renin binding protein [Source:MGI Symbol;Acc:MGI:105940]	-3.3297	2.03095e-06	7.41778e-05
Snca	protein_coding	synuclein, alpha [Source:MGI Symbol;Acc:MGI:1277151]	2.10233	2.07422e-06	7.56302e-05
Pias1	protein_coding	protein inhibitor of activated STAT 1 [Source:MGI Symbol;Acc:MGI:1913125]	-0.971657	2.10303e-06	7.65429e-05
Kndc1	protein_coding	kinase non-catalytic C-lobe domain (KIND) containing 1 [Source:MGI Symbol;Acc:MGI:1923734]	3.7523	2.10674e-06	7.65429e-05
Cstf2t	protein_coding	cleavage stimulation factor, 3' pre-RNA subunit 2, tau [Source:MGI Symbol;Acc:MGI:1932622]	-1.3036	2.10991e-06	7.65429e-05
Fign	protein_coding	fidgetin [Source:MGI Symbol;Acc:MGI:1890647]	-2.46592	2.11626e-06	7.66443e-05
Lamp1	protein_coding	lysosomal-associated membrane protein 1 [Source:MGI Symbol;Acc:MGI:96745]	-2.07954	2.14198e-06	7.73503e-05
Mapk10	protein_coding	mitogen-activated protein kinase 10 [Source:MGI Symbol;Acc:MGI:1346863]	2.72405	2.14294e-06	7.73503e-05
Hfe	protein_coding	homeostatic iron regulator [Source:MGI Symbol;Acc:MGI:109191]	-2.34193	2.15816e-06	7.77695e-05
Thy1	protein_coding	thymus cell antigen 1, theta [Source:MGI Symbol;Acc:MGI:98747]	2.613	2.16612e-06	7.79262e-05
Lrrc24	protein_coding	leucine rich repeat containing 24 [Source:MGI Symbol;Acc:MGI:3605040]	3.56899	2.19169e-06	7.86522e-05
Ivns1abp	protein_coding	influenza virus NS1A binding protein [Source:MGI Symbol;Acc:MGI:2152389]	1.57466	2.19699e-06	7.86522e-05
Khnyn	protein_coding	KH and NYN domain containing [Source:MGI Symbol;Acc:MGI:2451333]	-1.41305	2.19726e-06	7.86522e-05
Kcnq2	protein_coding	potassium voltage-gated channel, subfamily Q, member 2 [Source:MGI Symbol;Acc:MGI:1309503]	3.01986	2.22752e-06	7.96034e-05
Gm54109	lncRNA	predicted gene, 54109 [Source:MGI Symbol;Acc:MGI:6723243]	4.27761	2.23364e-06	7.969e-05
Il1rapl1	protein_coding	interleukin 1 receptor accessory protein-like 1 [Source:MGI Symbol;Acc:MGI:2687319]	3.64229	2.24091e-06	7.98173e-05
Htr1f	protein_coding	5-hydroxytryptamine (serotonin) receptor 1F [Source:MGI Symbol;Acc:MGI:99842]	4.28132	2.24505e-06	7.98327e-05
Atp2b1	protein_coding	ATPase, Ca++ transporting, plasma membrane 1 [Source:MGI Symbol;Acc:MGI:104653]	1.62439	2.30436e-06	8.18066e-05
Pcp4	protein_coding	Purkinje cell protein 4 [Source:MGI Symbol;Acc:MGI:97509]	2.96735	2.36547e-06	8.3838e-05
Gm43829	TEC	predicted gene 43829 [Source:MGI Symbol;Acc:MGI:5663966]	3.73452	2.3826e-06	8.43066e-05
Mir181a-1hg	lncRNA	Mir181a-1 and Mir181b-1 host gene [Source:MGI Symbol;Acc:MGI:2443823]	3.52636	2.40591e-06	8.49919e-05
Ap3b2	protein_coding	adaptor-related protein complex 3, beta 2 subunit [Source:MGI Symbol;Acc:MGI:1100869]	3.28495	2.43804e-06	8.5986e-05
Zfp655	protein_coding	zinc finger protein 655 [Source:MGI Symbol;Acc:MGI:1919861]	-2.33157	2.45243e-06	8.60833e-05
Nppc	protein_coding	natriuretic peptide type C [Source:MGI Symbol;Acc:MGI:97369]	10.0197	2.45257e-06	8.60833e-05
Rnf128	protein_coding	ring finger protein 128 [Source:MGI Symbol;Acc:MGI:1914139]	6.55751	2.45279e-06	8.60833e-05
Gabra3	protein_coding	gamma-aminobutyric acid type A receptor subunit alpha 3 [Source:MGI Symbol;Acc:MGI:95615]	2.71595	2.46828e-06	8.63895e-05
Fgf12	protein_coding	fibroblast growth factor 12 [Source:MGI Symbol;Acc:MGI:109183]	4.52179	2.46953e-06	8.63895e-05
Gm28703	lncRNA	predicted gene 28703 [Source:MGI Symbol;Acc:MGI:5579409]	-9.61997	2.48584e-06	8.68192e-05
Clgn	protein_coding	calmegin [Source:MGI Symbol;Acc:MGI:107472]	7.14516	2.55166e-06	8.89738e-05
Cd209a	protein_coding	CD209a antigen [Source:MGI Symbol;Acc:MGI:2157942]	-8.44211	2.5714e-06	8.95171e-05
Fam174b	protein_coding	family with sequence similarity 174, member B [Source:MGI Symbol;Acc:MGI:3698178]	-2.69682	2.58302e-06	8.97767e-05
Gm20754	lncRNA	predicted gene, 20754 [Source:MGI Symbol;Acc:MGI:5434110]	8.72908	2.6198e-06	9.09084e-05
Cbx2	protein_coding	chromobox 2 [Source:MGI Symbol;Acc:MGI:88289]	-5.49599	2.66974e-06	9.24923e-05
Cmtm6	protein_coding	CKLF-like MARVEL transmembrane domain containing 6 [Source:MGI Symbol;Acc:MGI:2447165]	-1.22413	2.68004e-06	9.27e-05
Bmp4	protein_coding	bone morphogenetic protein 4 [Source:MGI Symbol;Acc:MGI:88180]	-5.7156	2.71834e-06	9.38743e-05
Mag	protein_coding	myelin-associated glycoprotein [Source:MGI Symbol;Acc:MGI:96912]	5.58869	2.74241e-06	9.45539e-05
Tub	protein_coding	tubby bipartite transcription factor [Source:MGI Symbol;Acc:MGI:2651573]	3.03489	2.75781e-06	9.49329e-05
Aph1a	protein_coding	aph1 homolog A, gamma secretase subunit [Source:MGI Symbol;Acc:MGI:2385110]	-2.31679	2.78081e-06	9.5572e-05
Gm43198	TEC	predicted gene 43198 [Source:MGI Symbol;Acc:MGI:5663335]	-8.47671	2.78988e-06	9.5731e-05
Rimbp2	protein_coding	RIMS binding protein 2 [Source:MGI Symbol;Acc:MGI:2443235]	3.02421	2.79537e-06	9.5767e-05
Btbd8	protein_coding	BTB domain containing 8 [Source:MGI Symbol;Acc:MGI:3646208]	3.16544	2.80652e-06	9.59963e-05
Cfap126	protein_coding	cilia and flagella associated protein 126 [Source:MGI Symbol;Acc:MGI:1922722]	-8.03008	2.84505e-06	9.71046e-05
Frrs1l	protein_coding	ferric-chelate reductase 1 like [Source:MGI Symbol;Acc:MGI:2442704]	2.72607	2.85183e-06	9.71046e-05
Cbarp	protein_coding	calcium channel, voltage-dependent, beta subunit associated regulatory protein [Source:MGI Symbol;Acc:MGI:1354170]	2.05148	2.85244e-06	9.71046e-05
Tsix	lncRNA	X (inactive)-specific transcript, opposite strand [Source:MGI Symbol;Acc:MGI:1336196]	14.3339	2.87871e-06	9.78444e-05
Clip2	protein_coding	CAP-GLY domain containing linker protein 2 [Source:MGI Symbol;Acc:MGI:1313136]	2.56813	2.90304e-06	9.8516e-05
Pdgfd	protein_coding	platelet-derived growth factor, D polypeptide [Source:MGI Symbol;Acc:MGI:1919035]	-1.64068	2.93862e-06	9.95664e-05
Gpr4	protein_coding	G protein-coupled receptor 4 [Source:MGI Symbol;Acc:MGI:2441992]	-2.07901	2.96057e-06	0.000100153
Gm9954	TEC	predicted gene 9954 [Source:MGI Symbol;Acc:MGI:3642120]	5.63344	2.99188e-06	0.000101053
Kcnj9	protein_coding	potassium inwardly-rectifying channel, subfamily J, member 9 [Source:MGI Symbol;Acc:MGI:108007]	3.72113	2.9972e-06	0.000101074
5330434G04Rik	lncRNA	RIKEN cDNA 5330434G04 gene [Source:MGI Symbol;Acc:MGI:1925519]	3.83149	3.05284e-06	0.00010279
Brix1	protein_coding	BRX1, biogenesis of ribosomes [Source:MGI Symbol;Acc:MGI:1915082]	-1.3829	3.05793e-06	0.000102801
Dmpk	protein_coding	dystrophia myotonica-protein kinase [Source:MGI Symbol;Acc:MGI:94906]	-2.1597	3.09291e-06	0.000103815
Nrcam	protein_coding	neuronal cell adhesion molecule [Source:MGI Symbol;Acc:MGI:104750]	3.04423	3.10253e-06	0.000103963
Camkk1	protein_coding	calcium/calmodulin-dependent protein kinase kinase 1, alpha [Source:MGI Symbol;Acc:MGI:1891766]	2.94603	3.10698e-06	0.000103963
Cdk10	protein_coding	cyclin dependent kinase 10 [Source:MGI Symbol;Acc:MGI:2448549]	1.30414	3.13665e-06	0.000104793
Adarb1	protein_coding	adenosine deaminase, RNA-specific, B1 [Source:MGI Symbol;Acc:MGI:891999]	1.85443	3.17457e-06	0.000105896
Slc7a6	protein_coding	solute carrier family 7 (cationic amino acid transporter, y+ system), member 6 [Source:MGI Symbol;Acc:MGI:2142598]	1.74149	3.19428e-06	0.000106389
Islr	protein_coding	immunoglobulin superfamily containing leucine-rich repeat [Source:MGI Symbol;Acc:MGI:1349645]	-4.04844	3.2372e-06	0.000107652
Slc2a12	protein_coding	solute carrier family 2 (facilitated glucose transporter), member 12 [Source:MGI Symbol;Acc:MGI:3052471]	-2.11982	3.25325e-06	0.000108019
Plekha5	protein_coding	pleckstrin homology domain containing, family A member 5 [Source:MGI Symbol;Acc:MGI:1923802]	1.59707	3.26353e-06	0.000108194
Syndig1l	protein_coding	synapse differentiation inducing 1 like [Source:MGI Symbol;Acc:MGI:2685107]	4.47262	3.27285e-06	0.000108336
Plp1	protein_coding	proteolipid protein (myelin) 1 [Source:MGI Symbol;Acc:MGI:97623]	3.72406	3.28568e-06	0.000108594
Ddr2	protein_coding	discoidin domain receptor family, member 2 [Source:MGI Symbol;Acc:MGI:1345277]	-2.84135	3.3208e-06	0.00010949
Ncf1	protein_coding	neutrophil cytosolic factor 1 [Source:MGI Symbol;Acc:MGI:97283]	-9.85504	3.32297e-06	0.00010949
Cacna1b	protein_coding	calcium channel, voltage-dependent, N type, alpha 1B subunit [Source:MGI Symbol;Acc:MGI:88296]	3.04382	3.33979e-06	0.000109876
Add2	protein_coding	adducin 2 [Source:MGI Symbol;Acc:MGI:87919]	3.08257	3.34508e-06	0.000109883
Ica1l	protein_coding	islet cell autoantigen 1-like [Source:MGI Symbol;Acc:MGI:1917625]	2.77757	3.39479e-06	0.000111346
Slc6a17	protein_coding	solute carrier family 6 (neurotransmitter transporter), member 17 [Source:MGI Symbol;Acc:MGI:2442535]	2.73256	3.40251e-06	0.000111429
D7Bwg0826e	TEC	DNA segment, Chr 7, Brigham & Women's Genetics 0826 expressed [Source:MGI Symbol;Acc:MGI:106455]	-2.73669	3.43174e-06	0.000112216
Elfn2	protein_coding	leucine rich repeat and fibronectin type III, extracellular 2 [Source:MGI Symbol;Acc:MGI:3608416]	4.00329	3.51913e-06	0.000114899
Gls2	protein_coding	glutaminase 2 (liver, mitochondrial) [Source:MGI Symbol;Acc:MGI:2143539]	2.71357	3.58982e-06	0.00011703
2900022M07Rik	TEC	RIKEN cDNA 2900022M07 gene [Source:MGI Symbol;Acc:MGI:1920201]	3.48117	3.60874e-06	0.000117469
Gm35755	processed_pseudogene	predicted gene, 35755 [Source:MGI Symbol;Acc:MGI:5594914]	2.49778	3.6172e-06	0.000117567
4930594M22Rik	lncRNA	RIKEN cDNA 4930594M22 gene [Source:MGI Symbol;Acc:MGI:1925478]	-1.84409	3.67863e-06	0.000119384
Fzd2	protein_coding	frizzled class receptor 2 [Source:MGI Symbol;Acc:MGI:1888513]	-4.07427	3.73148e-06	0.000120917
Ccdc39	protein_coding	coiled-coil domain containing 39 [Source:MGI Symbol;Acc:MGI:1289263]	2.2	3.73919e-06	0.000120985
Ncald	protein_coding	neurocalcin delta [Source:MGI Symbol;Acc:MGI:1196326]	3.1566	3.76522e-06	0.000121644
Kcnj13	protein_coding	potassium inwardly-rectifying channel, subfamily J, member 13 [Source:MGI Symbol;Acc:MGI:3781032]	-10.5846	3.78937e-06	0.000122241
Cdh10	protein_coding	cadherin 10 [Source:MGI Symbol;Acc:MGI:107436]	3.8126	3.80075e-06	0.000122425
Cd63	protein_coding	CD63 antigen [Source:MGI Symbol;Acc:MGI:99529]	-1.90137	3.8562e-06	0.000124026
1700028K03Rik	protein_coding	RIKEN cDNA 1700028K03 gene [Source:MGI Symbol;Acc:MGI:1923671]	7.27329	3.86444e-06	0.000124106
Sh3rf2	protein_coding	SH3 domain containing ring finger 2 [Source:MGI Symbol;Acc:MGI:2444628]	-7.69553	3.95332e-06	0.000126771
Mxra8os	lncRNA	matrix-remodelling associated 8, opposite strand [Source:MGI Symbol;Acc:MGI:3704241]	-3.26496	3.97168e-06	0.000127171
Gm19938	lncRNA	predicted gene, 19938 [Source:MGI Symbol;Acc:MGI:5012123]	3.98826	3.99455e-06	0.000127713
Cacna1e	protein_coding	calcium channel, voltage-dependent, R type, alpha 1E subunit [Source:MGI Symbol;Acc:MGI:106217]	2.64059	4.01451e-06	0.000128161
Gsn	protein_coding	gelsolin [Source:MGI Symbol;Acc:MGI:95851]	-2.89765	4.02983e-06	0.00012831
Yif1b	protein_coding	Yip1 interacting factor homolog B (S. cerevisiae) [Source:MGI Symbol;Acc:MGI:1924504]	-1.15497	4.03108e-06	0.00012831
Tmem132b	protein_coding	transmembrane protein 132B [Source:MGI Symbol;Acc:MGI:3609245]	2.99545	4.06445e-06	0.000129181
Gm37776	TEC	predicted gene, 37776 [Source:MGI Symbol;Acc:MGI:5611004]	9.81458	4.07979e-06	0.000129478
Gm43896	TEC	predicted gene, 43896 [Source:MGI Symbol;Acc:MGI:5690288]	6.33872	4.12106e-06	0.000130412
C78859	lncRNA	expressed sequence C78859 [Source:MGI Symbol;Acc:MGI:2142856]	3.10198	4.12134e-06	0.000130412
Hapln3	protein_coding	hyaluronan and proteoglycan link protein 3 [Source:MGI Symbol;Acc:MGI:1914916]	-9.3418	4.13411e-06	0.000130624
Vstm5	protein_coding	V-set and transmembrane domain containing 5 [Source:MGI Symbol;Acc:MGI:1916387]	8.03134	4.15394e-06	0.000131059
Gm4017	processed_pseudogene	predicted gene 4017 [Source:MGI Symbol;Acc:MGI:3782191]	-7.89917	4.18172e-06	0.000131742
Sptssb	protein_coding	serine palmitoyltransferase, small subunit B [Source:MGI Symbol;Acc:MGI:1913433]	-12.6754	4.27588e-06	0.000134512
Ptgs2	protein_coding	prostaglandin-endoperoxide synthase 2 [Source:MGI Symbol;Acc:MGI:97798]	-3.77461	4.31515e-06	0.00013555
Piga	protein_coding	phosphatidylinositol glycan anchor biosynthesis, class A [Source:MGI Symbol;Acc:MGI:99461]	-2.98608	4.35701e-06	0.000136666
Adra2a	protein_coding	adrenergic receptor, alpha 2a [Source:MGI Symbol;Acc:MGI:87934]	-5.35568	4.44668e-06	0.000139276
Gm44830	TEC	predicted gene 44830 [Source:MGI Symbol;Acc:MGI:5753406]	2.93377	4.46686e-06	0.000139704
Crhbp	protein_coding	corticotropin releasing hormone binding protein [Source:MGI Symbol;Acc:MGI:88497]	5.0945	4.54089e-06	0.000141814
Ark2c	protein_coding	arkadia (RNF111) C-terminal like ring finger ubiquitin ligase 2C [Source:MGI Symbol;Acc:MGI:2444521]	2.63279	4.58667e-06	0.000143037
Srprb	protein_coding	signal recognition particle receptor, B subunit [Source:MGI Symbol;Acc:MGI:102964]	-1.85166	4.6006e-06	0.000143264
Rims2	protein_coding	regulating synaptic membrane exocytosis 2 [Source:MGI Symbol;Acc:MGI:2152972]	2.25728	4.69769e-06	0.000146076
Smim13	protein_coding	small integral membrane protein 13 [Source:MGI Symbol;Acc:MGI:2652854]	2.31859	4.71116e-06	0.000146284
Gm38042	TEC	predicted gene, 38042 [Source:MGI Symbol;Acc:MGI:5611270]	-3.93352	4.72105e-06	0.00014638
Rbmxl1	protein_coding	RNA binding motif protein, X-linked like-1 [Source:MGI Symbol;Acc:MGI:1343045]	-1.51614	4.74623e-06	0.000146949
Tmem154	protein_coding	transmembrane protein 154 [Source:MGI Symbol;Acc:MGI:2444725]	-5.62472	4.82104e-06	0.000149051
Atg16l1	protein_coding	autophagy related 16 like 1 [Source:MGI Symbol;Acc:MGI:1924290]	1.52983	4.8461e-06	0.000149611
Npl	protein_coding	N-acetylneuraminate pyruvate lyase [Source:MGI Symbol;Acc:MGI:1921341]	-5.33895	4.86627e-06	0.000150019
Ncam2	protein_coding	neural cell adhesion molecule 2 [Source:MGI Symbol;Acc:MGI:97282]	3.28758	4.88754e-06	0.000150459
Lrrc7	protein_coding	leucine rich repeat containing 7 [Source:MGI Symbol;Acc:MGI:2676665]	3.06925	4.93663e-06	0.000151754
Snai1	protein_coding	snail family zinc finger 1 [Source:MGI Symbol;Acc:MGI:98330]	-4.93056	4.96244e-06	0.00015233
Parp3	protein_coding	poly (ADP-ribose) polymerase family, member 3 [Source:MGI Symbol;Acc:MGI:1891258]	-3.40527	4.97099e-06	0.000152375
Slc31a2	protein_coding	solute carrier family 31, member 2 [Source:MGI Symbol;Acc:MGI:1333844]	-1.4552	4.99406e-06	0.00015269
Tmem151a	protein_coding	transmembrane protein 151A [Source:MGI Symbol;Acc:MGI:2147713]	2.65416	4.99544e-06	0.00015269
Vps54	protein_coding	VPS54 GARP complex subunit [Source:MGI Symbol;Acc:MGI:2178798]	1.30311	5.00437e-06	0.000152747
Fstl1	protein_coding	follistatin-like 1 [Source:MGI Symbol;Acc:MGI:102793]	-2.24534	5.02469e-06	0.00015315
Rnf150	protein_coding	ring finger protein 150 [Source:MGI Symbol;Acc:MGI:2443860]	2.58843	5.03612e-06	0.000153282
R3hcc1	protein_coding	R3H domain and coiled-coil containing 1 [Source:MGI Symbol;Acc:MGI:1919093]	-1.39515	5.04764e-06	0.000153415
Dynlt1f	protein_coding	dynein light chain Tctex-type 1F [Source:MGI Symbol;Acc:MGI:3780996]	-2.1954	5.08083e-06	0.000154207
Tmem30b	protein_coding	transmembrane protein 30B [Source:MGI Symbol;Acc:MGI:2442082]	-9.75655	5.12321e-06	0.000155274
A930037H05Rik	lncRNA	RIKEN cDNA A930037H05 gene [Source:MGI Symbol;Acc:MGI:1925689]	-2.55749	5.14101e-06	0.000155595
Cyp4f15	protein_coding	cytochrome P450, family 4, subfamily f, polypeptide 15 [Source:MGI Symbol;Acc:MGI:2146921]	2.73682	5.17727e-06	0.000156471
Gm38336	lncRNA	predicted gene, 38336 [Source:MGI Symbol;Acc:MGI:5611564]	2.49149	5.18449e-06	0.000156471
Dlx1	protein_coding	distal-less homeobox 1 [Source:MGI Symbol;Acc:MGI:94901]	4.08	5.34399e-06	0.00016106
Reep2	protein_coding	receptor accessory protein 2 [Source:MGI Symbol;Acc:MGI:2385070]	2.18336	5.35486e-06	0.000161162
Gls	protein_coding	glutaminase [Source:MGI Symbol;Acc:MGI:95752]	1.88839	5.40184e-06	0.000162349
Gm23928	snRNA	predicted gene, 23928 [Source:MGI Symbol;Acc:MGI:5453705]	7.89734	5.41921e-06	0.000162644
Gm48408	TEC	predicted gene, 48408 [Source:MGI Symbol;Acc:MGI:6097898]	8.86905	5.43858e-06	0.000162999
Oprk1	protein_coding	opioid receptor, kappa 1 [Source:MGI Symbol;Acc:MGI:97439]	9.74091	5.48398e-06	0.000164131
Slc38a2	protein_coding	solute carrier family 38, member 2 [Source:MGI Symbol;Acc:MGI:1915010]	-3.38734	5.56284e-06	0.00016626
Vstm4	protein_coding	V-set and transmembrane domain containing 4 [Source:MGI Symbol;Acc:MGI:2444633]	-3.81426	5.62978e-06	0.000168028
Lingo3	protein_coding	leucine rich repeat and Ig domain containing 3 [Source:MGI Symbol;Acc:MGI:3609246]	4.5359	5.69082e-06	0.000169615
Nalf1	protein_coding	NALCN channel auxiliary factor 1 [Source:MGI Symbol;Acc:MGI:2142765]	3.39577	5.70489e-06	0.000169656
Cdk14	protein_coding	cyclin dependent kinase 14 [Source:MGI Symbol;Acc:MGI:894318]	2.1436	5.70794e-06	0.000169656
Myom2	protein_coding	myomesin 2 [Source:MGI Symbol;Acc:MGI:1328358]	-9.72927	5.72209e-06	0.000169842
Basp1	protein_coding	brain abundant, membrane attached signal protein 1 [Source:MGI Symbol;Acc:MGI:1917600]	3.09625	5.77577e-06	0.0001712
Gm44644	lncRNA	predicted gene 44644 [Source:MGI Symbol;Acc:MGI:5753220]	5.18492	5.99983e-06	0.000177597
Grid2	protein_coding	glutamate receptor, ionotropic, delta 2 [Source:MGI Symbol;Acc:MGI:95813]	2.93166	6.07566e-06	0.000179595
Cdkn1c	protein_coding	cyclin dependent kinase inhibitor 1C [Source:MGI Symbol;Acc:MGI:104564]	-1.58443	6.13165e-06	0.000181001
Spp1	protein_coding	secreted phosphoprotein 1 [Source:MGI Symbol;Acc:MGI:98389]	-5.19817	6.34408e-06	0.000187016
D430041D05Rik	protein_coding	RIKEN cDNA D430041D05 gene [Source:MGI Symbol;Acc:MGI:2181743]	3.46334	6.36707e-06	0.000187437
Gm38882	lncRNA	predicted gene, 38882 [Source:MGI Symbol;Acc:MGI:5621767]	-4.08268	6.49952e-06	0.000191028
Cpne9	protein_coding	copine family member IX [Source:MGI Symbol;Acc:MGI:2443052]	3.70396	6.50677e-06	0.000191028
Mterf4	protein_coding	mitochondrial transcription termination factor 4 [Source:MGI Symbol;Acc:MGI:1918355]	-2.2849	6.57788e-06	0.00019261
Fmnl1	protein_coding	formin-like 1 [Source:MGI Symbol;Acc:MGI:1888994]	2.18463	6.57853e-06	0.00019261
Gm15425	processed_pseudogene	predicted gene 15425 [Source:MGI Symbol;Acc:MGI:3705642]	3.49608	6.59711e-06	0.000192892
Ociad2	protein_coding	OCIA domain containing 2 [Source:MGI Symbol;Acc:MGI:1916377]	2.86004	6.62151e-06	0.000193343
Mxra8	protein_coding	matrix-remodelling associated 8 [Source:MGI Symbol;Acc:MGI:1922011]	-2.66332	6.6497e-06	0.000193903
Gm37811	TEC	predicted gene, 37811 [Source:MGI Symbol;Acc:MGI:5611039]	3.82687	6.7419e-06	0.000196326
Gm43320	TEC	predicted gene 43320 [Source:MGI Symbol;Acc:MGI:5663457]	4.54287	6.84443e-06	0.000199043
Misp	protein_coding	mitotic spindle positioning [Source:MGI Symbol;Acc:MGI:1926156]	-9.19095	6.95813e-06	0.000201881
Ankrd34c	protein_coding	ankyrin repeat domain 34C [Source:MGI Symbol;Acc:MGI:2685617]	7.8514	6.96091e-06	0.000201881
Dpp4	protein_coding	dipeptidylpeptidase 4 [Source:MGI Symbol;Acc:MGI:94919]	-3.89618	6.97014e-06	0.000201881
Gng4	protein_coding	guanine nucleotide binding protein (G protein), gamma 4 [Source:MGI Symbol;Acc:MGI:102703]	5.02451	7.14365e-06	0.000206629
Sec61b	protein_coding	SEC61 translocon subunit beta [Source:MGI Symbol;Acc:MGI:1913462]	-1.22253	7.22747e-06	0.000208674
Wls	protein_coding	wntless WNT ligand secretion mediator [Source:MGI Symbol;Acc:MGI:1915401]	-2.53947	7.23373e-06	0.000208674
Icam5	protein_coding	intercellular adhesion molecule 5, telencephalin [Source:MGI Symbol;Acc:MGI:109430]	2.24406	7.30815e-06	0.000210539
Ftx	lncRNA	Ftx transcript, Xist regulator, non-protein coding [Source:MGI Symbol;Acc:MGI:1926128]	2.29023	7.32159e-06	0.000210645
Gm47591	lncRNA	predicted gene, 47591 [Source:MGI Symbol;Acc:MGI:6096636]	2.87365	7.37118e-06	0.000211596
Gm5089	lncRNA	predicted gene 5089 [Source:MGI Symbol;Acc:MGI:3644731]	-3.31262	7.3743e-06	0.000211596
Agap1	protein_coding	ArfGAP with GTPase domain, ankyrin repeat and PH domain 1 [Source:MGI Symbol;Acc:MGI:2653690]	1.35117	7.38734e-06	0.000211689
Tmem176b	protein_coding	transmembrane protein 176B [Source:MGI Symbol;Acc:MGI:1916348]	-1.69222	7.4127e-06	0.000212133
Dgcr6	protein_coding	DiGeorge syndrome critical region gene 6 [Source:MGI Symbol;Acc:MGI:1202877]	-1.01075	7.46862e-06	0.000213404
Gm31834	lncRNA	predicted gene, 31834 [Source:MGI Symbol;Acc:MGI:5590993]	-4.27231	7.47692e-06	0.000213404
Cxadr	protein_coding	coxsackie virus and adenovirus receptor [Source:MGI Symbol;Acc:MGI:1201679]	-2.98694	7.59487e-06	0.000216484
Snx6	protein_coding	sorting nexin 6 [Source:MGI Symbol;Acc:MGI:1919433]	-1.58638	7.60625e-06	0.000216522
Gm42656	TEC	predicted gene 42656 [Source:MGI Symbol;Acc:MGI:5662793]	6.29871	7.61796e-06	0.000216569
Cdr1os	lncRNA	cerebellar degeneration related antigen 1, opposite strand [Source:MGI Symbol;Acc:MGI:5637821]	2.48955	7.62922e-06	0.000216603
Cd209g	protein_coding	CD209g antigen [Source:MGI Symbol;Acc:MGI:1917442]	-7.72079	7.759e-06	0.000219998
Mcm9	protein_coding	minichromosome maintenance 9 homologous recombination repair factor [Source:MGI Symbol;Acc:MGI:1918817]	-2.12248	7.84146e-06	0.000222044
Hlf	protein_coding	hepatic leukemia factor [Source:MGI Symbol;Acc:MGI:96108]	-1.48296	7.90028e-06	0.000223416
Tpgs1	protein_coding	tubulin polyglutamylase complex subunit 1 [Source:MGI Symbol;Acc:MGI:106618]	-1.09912	7.93939e-06	0.000224228
Gm45176	TEC	predicted gene 45176 [Source:MGI Symbol;Acc:MGI:5753752]	3.77616	8.02668e-06	0.000226397
Cd4	protein_coding	CD4 antigen [Source:MGI Symbol;Acc:MGI:88335]	-8.97558	8.07565e-06	0.00022748
Gm37980	TEC	predicted gene, 37980 [Source:MGI Symbol;Acc:MGI:5611208]	3.18271	8.11221e-06	0.000228211
Csmd1	protein_coding	CUB and Sushi multiple domains 1 [Source:MGI Symbol;Acc:MGI:2137383]	3.30532	8.18964e-06	0.000230049
Cit	protein_coding	citron [Source:MGI Symbol;Acc:MGI:105313]	2.12975	8.19889e-06	0.000230049
Dzank1	protein_coding	double zinc ribbon and ankyrin repeat domains 1 [Source:MGI Symbol;Acc:MGI:2139080]	2.49495	8.28722e-06	0.000232225
Ccl27a	protein_coding	C-C motif chemokine ligand 27A [Source:MGI Symbol;Acc:MGI:1343459]	2.05697	8.53231e-06	0.000238783
Nrp2	protein_coding	neuropilin 2 [Source:MGI Symbol;Acc:MGI:1100492]	-2.73999	8.63225e-06	0.000241266
Slc16a6	protein_coding	solute carrier family 16 (monocarboxylic acid transporters), member 6 [Source:MGI Symbol;Acc:MGI:2144585]	-2.71531	8.65261e-06	0.000241522
Brinp1	protein_coding	bone morphogenic protein/retinoic acid inducible neural specific 1 [Source:MGI Symbol;Acc:MGI:1928478]	3.49058	8.751e-06	0.000243953
Hbb-y	protein_coding	hemoglobin Y, beta-like embryonic chain [Source:MGI Symbol;Acc:MGI:96027]	-9.25585	8.81099e-06	0.000245307
Entrep2	protein_coding	endosomal transmembrane epsin interactor 2 [Source:MGI Symbol;Acc:MGI:1917888]	3.21027	8.9443e-06	0.000248698
Gab3	protein_coding	growth factor receptor bound protein 2-associated protein 3 [Source:MGI Symbol;Acc:MGI:2387324]	-4.00356	8.97594e-06	0.000249256
Scg5	protein_coding	secretogranin V [Source:MGI Symbol;Acc:MGI:98289]	2.24805	9.03242e-06	0.000250341
Pou6f2	protein_coding	POU domain, class 6, transcription factor 2 [Source:MGI Symbol;Acc:MGI:2443631]	6.06979	9.03826e-06	0.000250341
2810002D19Rik	lncRNA	RIKEN cDNA 2810002D19 gene [Source:MGI Symbol;Acc:MGI:1913707]	-1.67989	9.07965e-06	0.000251165
Gm43618	TEC	predicted gene 43618 [Source:MGI Symbol;Acc:MGI:5663755]	-8.31995	9.12173e-06	0.000252005
Zcchc18	protein_coding	zinc finger, CCHC domain containing 18 [Source:MGI Symbol;Acc:MGI:1914245]	2.72753	9.38074e-06	0.000258527
Map1a	protein_coding	microtubule-associated protein 1 A [Source:MGI Symbol;Acc:MGI:1306776]	2.41894	9.3841e-06	0.000258527
Stxbp1	protein_coding	syntaxin binding protein 1 [Source:MGI Symbol;Acc:MGI:107363]	1.66285	9.39529e-06	0.000258527
Cpq	protein_coding	carboxypeptidase Q [Source:MGI Symbol;Acc:MGI:1889205]	-2.32297	9.40578e-06	0.000258527
Spx	protein_coding	spexin hormone [Source:MGI Symbol;Acc:MGI:2442262]	8.05017	9.55251e-06	0.000262225
Kcnh4	protein_coding	potassium voltage-gated channel, subfamily H (eag-related), member 4 [Source:MGI Symbol;Acc:MGI:2156184]	4.26714	9.61774e-06	0.00026368
Sema5b	protein_coding	sema domain, seven thrombospondin repeats (type 1 and type 1-like), transmembrane domain (TM) and short cytoplasmic domain, (semaphorin) 5B [Source:MGI Symbol;Acc:MGI:107555]	3.02689	9.64395e-06	0.000264063
Slc25a19	protein_coding	solute carrier family 25 (mitochondrial thiamine pyrophosphate carrier), member 19 [Source:MGI Symbol;Acc:MGI:1914533]	1.52138	9.68207e-06	0.00026477
Pla2g4a	protein_coding	phospholipase A2, group IVA (cytosolic, calcium-dependent) [Source:MGI Symbol;Acc:MGI:1195256]	-2.90617	9.79819e-06	0.000267606
Atp1b3	protein_coding	ATPase, Na+/K+ transporting, beta 3 polypeptide [Source:MGI Symbol;Acc:MGI:107788]	-1.83699	9.84381e-06	0.000268512
Kcnn3	protein_coding	potassium intermediate/small conductance calcium-activated channel, subfamily N, member 3 [Source:MGI Symbol;Acc:MGI:2153183]	2.76705	9.8785e-06	0.000269117
Sytl2	protein_coding	synaptotagmin-like 2 [Source:MGI Symbol;Acc:MGI:1933366]	2.91513	9.97581e-06	0.000271425
Ndufs8	protein_coding	NADH:ubiquinone oxidoreductase core subunit S8 [Source:MGI Symbol;Acc:MGI:2385079]	-0.970592	1.00254e-05	0.000272431
Soat1	protein_coding	sterol O-acyltransferase 1 [Source:MGI Symbol;Acc:MGI:104665]	-2.46381	1.00905e-05	0.000273853
Gm43166	lncRNA	predicted gene 43166 [Source:MGI Symbol;Acc:MGI:5663303]	9.27118	1.01449e-05	0.000274984
5033430I15Rik	lncRNA	RIKEN cDNA 5033430I15 gene [Source:MGI Symbol;Acc:MGI:1923250]	-8.28795	1.02934e-05	0.000278659
Tnfsf13	protein_coding	tumor necrosis factor (ligand) superfamily, member 13 [Source:MGI Symbol;Acc:MGI:1916833]	-3.46602	1.03255e-05	0.000279118
Gm42769	TEC	predicted gene 42769 [Source:MGI Symbol;Acc:MGI:5662906]	4.90949	1.03478e-05	0.000279118
Slc6a20a	protein_coding	solute carrier family 6 (neurotransmitter transporter), member 20A [Source:MGI Symbol;Acc:MGI:2143217]	-3.8405	1.03492e-05	0.000279118
Gm47583	TEC	predicted gene, 47583 [Source:MGI Symbol;Acc:MGI:6096621]	5.02562	1.04139e-05	0.000280512
Patz1	protein_coding	POZ (BTB) and AT hook containing zinc finger 1 [Source:MGI Symbol;Acc:MGI:1891832]	-1.48676	1.0529e-05	0.000283259
Bcl7c	protein_coding	B cell CLL/lymphoma 7C [Source:MGI Symbol;Acc:MGI:1332237]	-1.34181	1.05541e-05	0.000283579
Zfp97	protein_coding	zinc finger protein 97 [Source:MGI Symbol;Acc:MGI:105921]	-9.27608	1.06064e-05	0.000284377
Bcl11b	protein_coding	B cell leukemia/lymphoma 11B [Source:MGI Symbol;Acc:MGI:1929913]	2.9416	1.06203e-05	0.000284377
Gm17120	lncRNA	predicted gene 17120 [Source:MGI Symbol;Acc:MGI:4937947]	-4.11744	1.06234e-05	0.000284377
Gm28875	lncRNA	predicted gene 28875 [Source:MGI Symbol;Acc:MGI:5579581]	-2.97602	1.06489e-05	0.000284707
Ccdc122	protein_coding	coiled-coil domain containing 122 [Source:MGI Symbol;Acc:MGI:1918358]	-8.87463	1.07729e-05	0.000287665
Stx1a	protein_coding	syntaxin 1A (brain) [Source:MGI Symbol;Acc:MGI:109355]	2.13934	1.08388e-05	0.000289065
Abhd3	protein_coding	abhydrolase domain containing 3 [Source:MGI Symbol;Acc:MGI:2147183]	2.09081	1.09081e-05	0.000290555
C4b	protein_coding	complement C4B (Chido blood group) [Source:MGI Symbol;Acc:MGI:88228]	-2.34057	1.09259e-05	0.00029067
Atxn1	protein_coding	ataxin 1 [Source:MGI Symbol;Acc:MGI:104783]	1.23581	1.10493e-05	0.000293589
Myof	protein_coding	myoferlin [Source:MGI Symbol;Acc:MGI:1919192]	-2.46246	1.1063e-05	0.000293591
Rnf43	protein_coding	ring finger protein 43 [Source:MGI Symbol;Acc:MGI:2442609]	-8.80921	1.10958e-05	0.000294101
Brsk1	protein_coding	BR serine/threonine kinase 1 [Source:MGI Symbol;Acc:MGI:2685946]	2.42765	1.11636e-05	0.000295535
Wdr1	protein_coding	WD repeat domain 1 [Source:MGI Symbol;Acc:MGI:1337100]	-0.955301	1.12042e-05	0.000296196
Sult5a1	protein_coding	sulfotransferase family 5A, member 1 [Source:MGI Symbol;Acc:MGI:1931463]	-7.1777	1.12161e-05	0.000296196
Gm56999	lncRNA	predicted gene, 56999 [Source:MGI Symbol;Acc:MGI:7337911]	3.4448	1.12405e-05	0.000296257
Kcnab3os	lncRNA	potassium voltage-gated channel, shaker-related subfamily, beta member 3, opposite strand [Source:MGI Symbol;Acc:MGI:3801910]	7.32126	1.12616e-05	0.000296257
Sh3bp5	protein_coding	SH3-domain binding protein 5 (BTK-associated) [Source:MGI Symbol;Acc:MGI:1344391]	-2.45121	1.12621e-05	0.000296257
Six3os1	lncRNA	SIX homeobox 3, opposite strand 1 [Source:MGI Symbol;Acc:MGI:1925118]	8.94594	1.12734e-05	0.000296257
Gm12953	lncRNA	predicted gene 12953 [Source:MGI Symbol;Acc:MGI:3649497]	-4.99394	1.15616e-05	0.000303459
Gm36939	TEC	predicted gene, 36939 [Source:MGI Symbol;Acc:MGI:5610167]	8.8693	1.17892e-05	0.000309057
Madd	protein_coding	MAP-kinase activating death domain [Source:MGI Symbol;Acc:MGI:2444672]	1.96612	1.18467e-05	0.000310187
Slc7a6os	protein_coding	solute carrier family 7, member 6 opposite strand [Source:MGI Symbol;Acc:MGI:1916951]	1.46053	1.19944e-05	0.000313673
Irs3	protein_coding	insulin receptor substrate 3 [Source:MGI Symbol;Acc:MGI:1194882]	-10.4589	1.20223e-05	0.000314022
Ildr2	protein_coding	immunoglobulin-like domain containing receptor 2 [Source:MGI Symbol;Acc:MGI:1196370]	-2.84945	1.20671e-05	0.000314811
Atp6v0e	protein_coding	ATPase, H+ transporting, lysosomal V0 subunit E [Source:MGI Symbol;Acc:MGI:1328318]	-1.26985	1.21071e-05	0.000315471
Kif21b	protein_coding	kinesin family member 21B [Source:MGI Symbol;Acc:MGI:109234]	2.3051	1.21898e-05	0.000317244
Gm37221	TEC	predicted gene, 37221 [Source:MGI Symbol;Acc:MGI:5610449]	9.04304	1.22732e-05	0.000318953
Celf3	protein_coding	CUGBP, Elav-like family member 3 [Source:MGI Symbol;Acc:MGI:1926034]	2.75332	1.22851e-05	0.000318953
Gm47098	processed_pseudogene	predicted gene, 47098 [Source:MGI Symbol;Acc:MGI:6095833]	3.83694	1.24451e-05	0.000322719
Slc47a1	protein_coding	solute carrier family 47, member 1 [Source:MGI Symbol;Acc:MGI:1914723]	-11.4675	1.25105e-05	0.000324026
Mtcl3	protein_coding	MTCL family member 3 [Source:MGI Symbol;Acc:MGI:1914662]	2.61654	1.25406e-05	0.000324415
Nav3	protein_coding	neuron navigator 3 [Source:MGI Symbol;Acc:MGI:2183703]	2.65096	1.2572e-05	0.000324836
Nrg3	protein_coding	neuregulin 3 [Source:MGI Symbol;Acc:MGI:1097165]	3.37357	1.26574e-05	0.000326653
Itpr2	protein_coding	inositol 1,4,5-triphosphate receptor 2 [Source:MGI Symbol;Acc:MGI:99418]	-1.08041	1.27584e-05	0.000328864
Trim9	protein_coding	tripartite motif-containing 9 [Source:MGI Symbol;Acc:MGI:2137354]	2.04102	1.27779e-05	0.000328972
Sez6	protein_coding	seizure related gene 6 [Source:MGI Symbol;Acc:MGI:104745]	2.60101	1.28066e-05	0.000329318
Gm43066	lncRNA	predicted gene 43066 [Source:MGI Symbol;Acc:MGI:5663203]	7.3187	1.29428e-05	0.000332424
Gm28294	lncRNA	predicted gene 28294 [Source:MGI Symbol;Acc:MGI:5579000]	2.60535	1.29797e-05	0.000332977
Tbc1d9b	protein_coding	TBC1 domain family, member 9B [Source:MGI Symbol;Acc:MGI:1924045]	1.35442	1.31587e-05	0.000337139
Rufy3	protein_coding	RUN and FYVE domain containing 3 [Source:MGI Symbol;Acc:MGI:106484]	2.19163	1.31741e-05	0.000337139
Cubn	protein_coding	cubilin [Source:MGI Symbol;Acc:MGI:1931256]	-10.8302	1.31889e-05	0.000337139
Aff3	protein_coding	AF4/FMR2 family, member 3 [Source:MGI Symbol;Acc:MGI:106927]	-2.37805	1.34844e-05	0.000343935
Slc22a8	protein_coding	solute carrier family 22 (organic anion transporter), member 8 [Source:MGI Symbol;Acc:MGI:1336187]	-1.6348	1.35016e-05	0.000343935
6230426M11Rik	lncRNA	RIKEN cDNA 6230426M11 gene [Source:MGI Symbol;Acc:MGI:3648960]	-7.78485	1.35129e-05	0.000343935
Ubc	protein_coding	ubiquitin C [Source:MGI Symbol;Acc:MGI:98889]	-1.03334	1.35391e-05	0.000343935
9330159F19Rik	protein_coding	RIKEN cDNA 9330159F19 gene [Source:MGI Symbol;Acc:MGI:3036239]	2.7863	1.35463e-05	0.000343935
Ccl5	protein_coding	C-C motif chemokine ligand 5 [Source:MGI Symbol;Acc:MGI:98262]	-8.77293	1.35505e-05	0.000343935
Kcnf1	protein_coding	potassium voltage-gated channel, subfamily F, member 1 [Source:MGI Symbol;Acc:MGI:2687399]	4.06769	1.36086e-05	0.000345001
Stmn3	protein_coding	stathmin-like 3 [Source:MGI Symbol;Acc:MGI:1277137]	2.69749	1.38217e-05	0.000349994
Elavl2	protein_coding	ELAV like RNA binding protein 1 [Source:MGI Symbol;Acc:MGI:1100887]	3.09014	1.40579e-05	0.000355555
Padi1	protein_coding	peptidyl arginine deiminase, type I [Source:MGI Symbol;Acc:MGI:1338893]	-7.84473	1.42376e-05	0.00035968
1500015L24Rik	lncRNA	RIKEN cDNA 1500015L24 gene [Source:MGI Symbol;Acc:MGI:1916244]	8.70128	1.42759e-05	0.000359924
Serpinb6c	protein_coding	serine (or cysteine) peptidase inhibitor, clade B, member 6c [Source:MGI Symbol;Acc:MGI:2145481]	-7.04961	1.42807e-05	0.000359924
Gm14164	lncRNA	predicted gene 14164 [Source:MGI Symbol;Acc:MGI:3650730]	4.53465	1.43108e-05	0.000360261
Slc9a5	protein_coding	solute carrier family 9 (sodium/hydrogen exchanger), member 5 [Source:MGI Symbol;Acc:MGI:2685542]	5.63949	1.44835e-05	0.000364182
Anpep	protein_coding	alanyl aminopeptidase, membrane [Source:MGI Symbol;Acc:MGI:5000466]	-4.31267	1.451e-05	0.000364425
Adam22	protein_coding	a disintegrin and metallopeptidase domain 22 [Source:MGI Symbol;Acc:MGI:1340046]	2.62299	1.45668e-05	0.000365425
Gm44800	TEC	predicted gene 44800 [Source:MGI Symbol;Acc:MGI:5753376]	4.72019	1.4823e-05	0.000371419
Amer2	protein_coding	APC membrane recruitment 2 [Source:MGI Symbol;Acc:MGI:1919375]	2.24754	1.48566e-05	0.000371828
Trappc1	protein_coding	trafficking protein particle complex 1 [Source:MGI Symbol;Acc:MGI:1098727]	-1.07867	1.49505e-05	0.000373746
Arc	protein_coding	activity regulated cytoskeletal-associated protein [Source:MGI Symbol;Acc:MGI:88067]	3.69275	1.50408e-05	0.000375567
Pclo	protein_coding	piccolo (presynaptic cytomatrix protein) [Source:MGI Symbol;Acc:MGI:1349390]	2.83445	1.52029e-05	0.000379175
Angptl7	protein_coding	angiopoietin-like 7 [Source:MGI Symbol;Acc:MGI:3605801]	-6.64725	1.54265e-05	0.000384308
Ppp2r2b	protein_coding	protein phosphatase 2, regulatory subunit B, beta [Source:MGI Symbol;Acc:MGI:1920180]	2.34719	1.55734e-05	0.000387519
Fam53b	protein_coding	family with sequence similarity 53, member B [Source:MGI Symbol;Acc:MGI:1925188]	1.67646	1.56902e-05	0.000389974
Neat1	lncRNA	nuclear paraspeckle assembly transcript 1 (non-protein coding) [Source:MGI Symbol;Acc:MGI:1914211]	-1.48657	1.57547e-05	0.000391128
Kcna2	protein_coding	potassium voltage-gated channel, shaker-related subfamily, member 2 [Source:MGI Symbol;Acc:MGI:96659]	2.75903	1.58179e-05	0.000392244
Rnf112	protein_coding	ring finger protein 112 [Source:MGI Symbol;Acc:MGI:106611]	3.01909	1.58957e-05	0.000393721
Maml3	protein_coding	mastermind like transcriptional coactivator 3 [Source:MGI Symbol;Acc:MGI:2389461]	-2.1081	1.59611e-05	0.0003945
Gtf2b	protein_coding	general transcription factor IIB [Source:MGI Symbol;Acc:MGI:2385191]	-1.05982	1.59638e-05	0.0003945
Gm42447	TEC	predicted gene 42447 [Source:MGI Symbol;Acc:MGI:5662584]	3.57667	1.61041e-05	0.000397512
Klf5	protein_coding	Kruppel-like transcription factor 5 [Source:MGI Symbol;Acc:MGI:1338056]	-5.37937	1.63058e-05	0.000401912
Sncb	protein_coding	synuclein, beta [Source:MGI Symbol;Acc:MGI:1889011]	2.19256	1.63197e-05	0.000401912
Lrp8	protein_coding	low density lipoprotein receptor-related protein 8, apolipoprotein e receptor [Source:MGI Symbol;Acc:MGI:1340044]	1.40029	1.65855e-05	0.000407586
Prrt3	protein_coding	proline-rich transmembrane protein 3 [Source:MGI Symbol;Acc:MGI:2444810]	2.19083	1.65879e-05	0.000407586
Scara3	protein_coding	scavenger receptor class A, member 3 [Source:MGI Symbol;Acc:MGI:2444418]	-3.2296	1.66367e-05	0.000408319
Ust	protein_coding	uronyl-2-sulfotransferase [Source:MGI Symbol;Acc:MGI:2442406]	-4.04556	1.6786e-05	0.00041108
Plppr2	protein_coding	phospholipid phosphatase related 2 [Source:MGI Symbol;Acc:MGI:2384575]	2.39822	1.67873e-05	0.00041108
Adrb2	protein_coding	adrenergic receptor, beta 2 [Source:MGI Symbol;Acc:MGI:87938]	-1.8775	1.7163e-05	0.000419354
Foxd2	protein_coding	forkhead box D2 [Source:MGI Symbol;Acc:MGI:1347471]	-9.90243	1.71642e-05	0.000419354
Gm46633	lncRNA	predicted gene, 46633 [Source:MGI Symbol;Acc:MGI:5826270]	8.56758	1.72314e-05	0.00042052
Cd55	protein_coding	CD55 molecule, decay accelerating factor for complement [Source:MGI Symbol;Acc:MGI:104850]	-3.32204	1.72913e-05	0.000421281
Zfp750	protein_coding	zinc finger protein 750 [Source:MGI Symbol;Acc:MGI:2442210]	-7.53729	1.73017e-05	0.000421281
Anxa4	protein_coding	annexin A4 [Source:MGI Symbol;Acc:MGI:88030]	-2.24156	1.76314e-05	0.000428824
Nvl	protein_coding	nuclear VCP-like [Source:MGI Symbol;Acc:MGI:1914709]	1.81876	1.78978e-05	0.000434813
Abcg3	protein_coding	ATP binding cassette subfamily G member 3 [Source:MGI Symbol;Acc:MGI:1351624]	-8.84759	1.79668e-05	0.000435998
Gm37477	TEC	predicted gene, 37477 [Source:MGI Symbol;Acc:MGI:5610705]	-2.89015	1.80599e-05	0.00043705
Gm45793	TEC	predicted gene 45793 [Source:MGI Symbol;Acc:MGI:5804908]	4.81206	1.80637e-05	0.00043705
Gm19557	lncRNA	predicted gene, 19557 [Source:MGI Symbol;Acc:MGI:5011742]	-7.86242	1.8071e-05	0.00043705
Chuk	protein_coding	conserved helix-loop-helix ubiquitous kinase [Source:MGI Symbol;Acc:MGI:99484]	1.02999	1.81486e-05	0.000438435
Vstm2b	protein_coding	V-set and transmembrane domain containing 2B [Source:MGI Symbol;Acc:MGI:1914525]	2.43232	1.88371e-05	0.000454559
Sdf2	protein_coding	stromal cell derived factor 2 [Source:MGI Symbol;Acc:MGI:108019]	-1.41958	1.89528e-05	0.00045657
Ddost	protein_coding	dolichyl-di-phosphooligosaccharide-protein glycotransferase [Source:MGI Symbol;Acc:MGI:1194508]	-1.188	1.89628e-05	0.00045657
Bicd1	protein_coding	BICD cargo adaptor 1 [Source:MGI Symbol;Acc:MGI:1101760]	2.29659	1.94862e-05	0.000468647
Spire1	protein_coding	spire type actin nucleation factor 1 [Source:MGI Symbol;Acc:MGI:1915416]	1.81817	1.95083e-05	0.000468655
Ccdc121rt2	protein_coding	coiled-coil domain containing 121, retrogene 2 [Source:MGI Symbol;Acc:MGI:3648937]	6.30401	1.97032e-05	0.000472811
Dscam	protein_coding	DS cell adhesion molecule [Source:MGI Symbol;Acc:MGI:1196281]	3.94447	1.97468e-05	0.00047333
Rbfox3	protein_coding	RNA binding protein, fox-1 homolog (C. elegans) 3 [Source:MGI Symbol;Acc:MGI:106368]	2.40013	1.98604e-05	0.000475384
Tex50	protein_coding	testis expressed 50 [Source:MGI Symbol;Acc:MGI:1922183]	6.70855	1.98766e-05	0.000475384
Dmtn	protein_coding	dematin actin binding protein [Source:MGI Symbol;Acc:MGI:99670]	1.96792	1.99335e-05	0.000476216
Gm13677	processed_pseudogene	predicted gene 13677 [Source:MGI Symbol;Acc:MGI:3649765]	8.5801	1.99854e-05	0.000476927
Gabbr1	protein_coding	gamma-aminobutyric acid type B receptor subunit 1 [Source:MGI Symbol;Acc:MGI:1860139]	1.47196	2.00675e-05	0.000478358
Srcin1	protein_coding	SRC kinase signaling inhibitor 1 [Source:MGI Symbol;Acc:MGI:1933179]	2.59908	2.02343e-05	0.000481572
Etv5	protein_coding	ets variant 5 [Source:MGI Symbol;Acc:MGI:1096867]	2.05687	2.02471e-05	0.000481572
Trim24	protein_coding	tripartite motif-containing 24 [Source:MGI Symbol;Acc:MGI:109275]	1.68493	2.06489e-05	0.000490587
Hivep3	protein_coding	human immunodeficiency virus type I enhancer binding protein 3 [Source:MGI Symbol;Acc:MGI:106589]	1.58026	2.09951e-05	0.000497849
Igfbp3	protein_coding	insulin-like growth factor binding protein 3 [Source:MGI Symbol;Acc:MGI:96438]	-2.52104	2.10007e-05	0.000497849
Phactr1	protein_coding	phosphatase and actin regulator 1 [Source:MGI Symbol;Acc:MGI:2659021]	1.60821	2.11927e-05	0.000501847
Lsamp	protein_coding	limbic system-associated membrane protein [Source:MGI Symbol;Acc:MGI:1261760]	2.70764	2.12264e-05	0.000502094
Map2	protein_coding	microtubule-associated protein 2 [Source:MGI Symbol;Acc:MGI:97175]	2.20866	2.12752e-05	0.000502697
Slc39a2	protein_coding	solute carrier family 39 (zinc transporter), member 2 [Source:MGI Symbol;Acc:MGI:2684326]	5.00184	2.14716e-05	0.000506252
Gm33543	lncRNA	predicted gene, 33543 [Source:MGI Symbol;Acc:MGI:5592702]	-9.52058	2.14727e-05	0.000506252
Kifc2	protein_coding	kinesin family member C2 [Source:MGI Symbol;Acc:MGI:109187]	2.28536	2.16651e-05	0.000510203
Spred3	protein_coding	sprouty-related EVH1 domain containing 3 [Source:MGI Symbol;Acc:MGI:2142186]	1.99567	2.16876e-05	0.000510203
Gm4117	lncRNA	predicted gene 4117 [Source:MGI Symbol;Acc:MGI:3782293]	4.22083	2.17544e-05	0.000511216
Brinp2	protein_coding	bone morphogenic protein/retinoic acid inducible neural-specific 2 [Source:MGI Symbol;Acc:MGI:2443333]	3.73652	2.1845e-05	0.000512787
Pde4a	protein_coding	phosphodiesterase 4A, cAMP specific [Source:MGI Symbol;Acc:MGI:99558]	1.91023	2.19666e-05	0.00051508
Pbld1	protein_coding	phenazine biosynthesis-like protein domain containing 1 [Source:MGI Symbol;Acc:MGI:1915621]	-8.77044	2.20273e-05	0.000515526
Retreg3	protein_coding	reticulophagy regulator family member 3 [Source:MGI Symbol;Acc:MGI:1915248]	-1.46521	2.20335e-05	0.000515526
Gm45204	TEC	predicted gene 45204 [Source:MGI Symbol;Acc:MGI:5753780]	3.05188	2.20733e-05	0.000515656
Swi5	protein_coding	SWI5 recombination repair homolog (yeast) [Source:MGI Symbol;Acc:MGI:1920181]	-0.793895	2.21284e-05	0.000515656
Zdhhc8	protein_coding	zinc finger, DHHC domain containing 8 [Source:MGI Symbol;Acc:MGI:1338012]	1.35562	2.21365e-05	0.000515656
Slc4a3	protein_coding	solute carrier family 4 (anion exchanger), member 3 [Source:MGI Symbol;Acc:MGI:109350]	2.14525	2.2153e-05	0.000515656
Has3	protein_coding	hyaluronan synthase 3 [Source:MGI Symbol;Acc:MGI:109599]	-1.26129	2.21668e-05	0.000515656
Stx8	protein_coding	syntaxin 8 [Source:MGI Symbol;Acc:MGI:1890156]	-1.15152	2.21826e-05	0.000515656
Sra1	protein_coding	steroid receptor RNA activator 1 [Source:MGI Symbol;Acc:MGI:1344414]	-1.15967	2.23938e-05	0.000520004
Ncan	protein_coding	neurocan [Source:MGI Symbol;Acc:MGI:104694]	2.14156	2.24755e-05	0.000521339
Twist1	protein_coding	twist basic helix-loop-helix transcription factor 1 [Source:MGI Symbol;Acc:MGI:98872]	-8.96828	2.26013e-05	0.000522774
Rps6kl1	protein_coding	ribosomal protein S6 kinase-like 1 [Source:MGI Symbol;Acc:MGI:2443413]	3.26718	2.26078e-05	0.000522774
Pik3ap1	protein_coding	phosphoinositide-3-kinase adaptor protein 1 [Source:MGI Symbol;Acc:MGI:1933177]	-7.20011	2.26101e-05	0.000522774
Gm56656	lncRNA	predicted gene, 56656 [Source:MGI Symbol;Acc:MGI:7337226]	-1.69781	2.30004e-05	0.000531227
Dpysl2	protein_coding	dihydropyrimidinase-like 2 [Source:MGI Symbol;Acc:MGI:1349763]	1.34643	2.30279e-05	0.000531293
Gne	protein_coding	glucosamine (UDP-N-acetyl)-2-epimerase/N-acetylmannosamine kinase [Source:MGI Symbol;Acc:MGI:1354951]	-2.03856	2.32332e-05	0.000535236
Gm38178	TEC	predicted gene, 38178 [Source:MGI Symbol;Acc:MGI:5611406]	9.15577	2.32484e-05	0.000535236
B230362B09Rik	TEC	RIKEN cDNA B230362B09 gene [Source:MGI Symbol;Acc:MGI:2442793]	2.73843	2.33643e-05	0.00053733
Gm45153	TEC	predicted gene 45153 [Source:MGI Symbol;Acc:MGI:5753729]	3.72033	2.34943e-05	0.000539234
Rprml	protein_coding	reprimo-like [Source:MGI Symbol;Acc:MGI:2144486]	3.55663	2.34972e-05	0.000539234
Ephx4	protein_coding	epoxide hydrolase 4 [Source:MGI Symbol;Acc:MGI:2686228]	2.9332	2.37261e-05	0.000543908
Gtpbp10	protein_coding	GTP-binding protein 10 (putative) [Source:MGI Symbol;Acc:MGI:2385599]	-4.83391	2.38469e-05	0.000546097
Gbp8	protein_coding	guanylate-binding protein 8 [Source:MGI Symbol;Acc:MGI:1923324]	-5.86215	2.39952e-05	0.00054891
Cckbr	protein_coding	cholecystokinin B receptor [Source:MGI Symbol;Acc:MGI:99479]	3.21626	2.44295e-05	0.000558252
Tmem64	protein_coding	transmembrane protein 64 [Source:MGI Symbol;Acc:MGI:2140359]	-2.7228	2.47657e-05	0.000565334
Gm44026	lncRNA	predicted gene, 44026 [Source:MGI Symbol;Acc:MGI:5690418]	7.47033	2.51132e-05	0.000572661
Bace2	protein_coding	beta-site APP-cleaving enzyme 2 [Source:MGI Symbol;Acc:MGI:1860440]	-4.21935	2.5298e-05	0.000576265
Tnc	protein_coding	tenascin C [Source:MGI Symbol;Acc:MGI:101922]	-8.45225	2.56552e-05	0.000583784
Adap1	protein_coding	ArfGAP with dual PH domains 1 [Source:MGI Symbol;Acc:MGI:2442201]	2.70482	2.579e-05	0.000586233
Mst1r	protein_coding	macrophage stimulating 1 receptor (c-met-related tyrosine kinase) [Source:MGI Symbol;Acc:MGI:99614]	-8.66	2.62493e-05	0.000596045
Gm15812	processed_pseudogene	predicted gene 15812 [Source:MGI Symbol;Acc:MGI:3801816]	2.62669	2.62825e-05	0.000596171
Amph	protein_coding	amphiphysin [Source:MGI Symbol;Acc:MGI:103574]	2.82948	2.67144e-05	0.000605329
Gm42640	TEC	predicted gene 42640 [Source:MGI Symbol;Acc:MGI:5662777]	3.64989	2.70217e-05	0.000611649
Myt1l	protein_coding	myelin transcription factor 1-like [Source:MGI Symbol;Acc:MGI:1100511]	2.47537	2.77468e-05	0.000627405
Tox	protein_coding	thymocyte selection-associated high mobility group box [Source:MGI Symbol;Acc:MGI:2181659]	2.79673	2.78834e-05	0.0006293
Ahi1	protein_coding	Abelson helper integration site 1 [Source:MGI Symbol;Acc:MGI:87971]	2.60919	2.78891e-05	0.0006293
Bin1	protein_coding	bridging integrator 1 [Source:MGI Symbol;Acc:MGI:108092]	1.62357	2.79879e-05	0.000630641
Tppp	protein_coding	tubulin polymerization promoting protein [Source:MGI Symbol;Acc:MGI:1920198]	3.16255	2.8007e-05	0.000630641
Pcdhac2	protein_coding	protocadherin alpha subfamily C, 2 [Source:MGI Symbol;Acc:MGI:1891443]	8.54383	2.81996e-05	0.000634314
Arfgap3	protein_coding	ADP-ribosylation factor GTPase activating protein 3 [Source:MGI Symbol;Acc:MGI:1913501]	-1.96022	2.82631e-05	0.00063508
Cpne5	protein_coding	copine V [Source:MGI Symbol;Acc:MGI:2385908]	3.16863	2.84012e-05	0.000637517
Atp6v1g2	protein_coding	ATPase, H+ transporting, lysosomal V1 subunit G2 [Source:MGI Symbol;Acc:MGI:1913487]	2.49668	2.84448e-05	0.000637832
Gm42909	TEC	predicted gene 42909 [Source:MGI Symbol;Acc:MGI:5663046]	-9.43273	2.88284e-05	0.000645688
Shf	protein_coding	Src homology 2 domain containing F [Source:MGI Symbol;Acc:MGI:3613669]	-3.67013	2.88551e-05	0.000645688
Arap1	protein_coding	ArfGAP with RhoGAP domain, ankyrin repeat and PH domain 1 [Source:MGI Symbol;Acc:MGI:1916960]	-2.29707	2.9366e-05	0.000656439
Zrsr2	protein_coding	zinc finger (CCCH type), RNA binding motif and serine/arginine rich 2 [Source:MGI Symbol;Acc:MGI:103287]	1.13955	2.9533e-05	0.000659489
Gm48840	TEC	predicted gene, 48840 [Source:MGI Symbol;Acc:MGI:6098571]	-5.05602	2.95759e-05	0.000659763
Dlgap3	protein_coding	DLG associated protein 3 [Source:MGI Symbol;Acc:MGI:3039563]	2.68164	2.96279e-05	0.00066024
Gm33989	lncRNA	predicted gene, 33989 [Source:MGI Symbol;Acc:MGI:5593148]	-1.77091	2.97131e-05	0.000661455
Ttc19	protein_coding	tetratricopeptide repeat domain 19 [Source:MGI Symbol;Acc:MGI:1920045]	2.20299	2.98092e-05	0.000662908
Gm13189	lncRNA	predicted gene 13189 [Source:MGI Symbol;Acc:MGI:3650860]	7.4173	2.99092e-05	0.000664446
Rab34	protein_coding	RAB34, member RAS oncogene family [Source:MGI Symbol;Acc:MGI:104606]	-1.42339	2.99786e-05	0.000665302
Txndc5	protein_coding	thioredoxin domain containing 5 [Source:MGI Symbol;Acc:MGI:2145316]	-2.13615	3.00184e-05	0.000665501
Brcc3dc	protein_coding	BRCA1/BRCA2-containing complex, subunit 3, domain containing [Source:MGI Symbol;Acc:MGI:3647286]	5.52552	3.01355e-05	0.000667411
Scn9a	protein_coding	sodium channel, voltage-gated, type IX, alpha [Source:MGI Symbol;Acc:MGI:107636]	4.59337	3.02313e-05	0.000668844
Gm56759	lncRNA	predicted gene, 56759 [Source:MGI Symbol;Acc:MGI:7337431]	4.33795	3.05758e-05	0.000675772
Gm17484	lncRNA	predicted gene, 17484 [Source:MGI Symbol;Acc:MGI:4937118]	-2.4915	3.08092e-05	0.000680232
Laptm4a	protein_coding	lysosomal-associated protein transmembrane 4A [Source:MGI Symbol;Acc:MGI:108017]	-1.55666	3.11656e-05	0.000687399
Fmo5	protein_coding	flavin containing monooxygenase 5 [Source:MGI Symbol;Acc:MGI:1310004]	-1.88328	3.13236e-05	0.000689309
Amd-ps7	processed_pseudogene	S-adenosylmethionine decarboxylase, pseudogene 7 [Source:MGI Symbol;Acc:MGI:3646899]	5.11361	3.13307e-05	0.000689309
Ramp2	protein_coding	receptor (calcitonin) activity modifying protein 2 [Source:MGI Symbol;Acc:MGI:1859650]	-0.841565	3.13482e-05	0.000689309
Zfp982	protein_coding	zinc finger protein 982 [Source:MGI Symbol;Acc:MGI:3701121]	-8.76168	3.16075e-05	0.000694301
Gpr45	protein_coding	G protein-coupled receptor 45 [Source:MGI Symbol;Acc:MGI:2135882]	2.95733	3.17846e-05	0.000697481
Lingo2	protein_coding	leucine rich repeat and Ig domain containing 2 [Source:MGI Symbol;Acc:MGI:2442298]	4.75028	3.18586e-05	0.000698393
Rskr	protein_coding	ribosomal protein S6 kinase related [Source:MGI Symbol;Acc:MGI:2652869]	3.72192	3.18931e-05	0.000698439
Abca17	protein_coding	ATP-binding cassette, sub-family A member 17 [Source:MGI Symbol;Acc:MGI:3625331]	6.02964	3.23171e-05	0.000707006
Gria3	protein_coding	glutamate receptor, ionotropic, AMPA3 (alpha 3) [Source:MGI Symbol;Acc:MGI:95810]	2.13197	3.25038e-05	0.00071037
Tfap2b	protein_coding	transcription factor AP-2 beta [Source:MGI Symbol;Acc:MGI:104672]	-4.85945	3.28029e-05	0.00071576
Pgbd5	protein_coding	piggyBac transposable element derived 5 [Source:MGI Symbol;Acc:MGI:2429955]	2.88886	3.28169e-05	0.00071576
Opcml	protein_coding	opioid binding protein/cell adhesion molecule-like [Source:MGI Symbol;Acc:MGI:97397]	3.21521	3.2926e-05	0.000717415
Syn2	protein_coding	synapsin II [Source:MGI Symbol;Acc:MGI:103020]	2.23611	3.29687e-05	0.000717618
Plcxd2	protein_coding	phosphatidylinositol-specific phospholipase C, X domain containing 2 [Source:MGI Symbol;Acc:MGI:3647874]	3.26201	3.30686e-05	0.000719066
Gm16204	processed_pseudogene	predicted gene 16204 [Source:MGI Symbol;Acc:MGI:3801788]	6.27796	3.33117e-05	0.000723622
Kif20b	protein_coding	kinesin family member 20B [Source:MGI Symbol;Acc:MGI:2444576]	-8.42493	3.3444e-05	0.000725765
Peg3	protein_coding	paternally expressed 3 [Source:MGI Symbol;Acc:MGI:104748]	2.28814	3.38779e-05	0.000734442
Gm37717	TEC	predicted gene, 37717 [Source:MGI Symbol;Acc:MGI:5610945]	5.10746	3.4601e-05	0.000749364
Rpl10-ps3	protein_coding	ribosomal protein L10, pseudogene 3 [Source:MGI Symbol;Acc:MGI:3704336]	-1.68832	3.47415e-05	0.000751652
Syt7	protein_coding	synaptotagmin VII [Source:MGI Symbol;Acc:MGI:1859545]	2.34772	3.51561e-05	0.000759858
Gm23823	snoRNA	predicted gene, 23823 [Source:MGI Symbol;Acc:MGI:5453600]	6.52861	3.52315e-05	0.000760725
Arf2	protein_coding	ADP-ribosylation factor 2 [Source:MGI Symbol;Acc:MGI:99595]	-1.87276	3.53256e-05	0.000761993
Emd	protein_coding	emerin [Source:MGI Symbol;Acc:MGI:108117]	-1.14409	3.56197e-05	0.000767568
Ctf1	protein_coding	cardiotrophin 1 [Source:MGI Symbol;Acc:MGI:105115]	-9.30818	3.58144e-05	0.000770719
Nhsl2	protein_coding	NHS like 2 [Source:MGI Symbol;Acc:MGI:3645090]	-1.241	3.58374e-05	0.000770719
Ngly1	protein_coding	N-glycanase 1 [Source:MGI Symbol;Acc:MGI:1913276]	-1.26985	3.58822e-05	0.000770913
Gm45165	TEC	predicted gene 45165 [Source:MGI Symbol;Acc:MGI:5753741]	6.02365	3.62222e-05	0.000777442
Fam43a	protein_coding	family with sequence similarity 43, member A [Source:MGI Symbol;Acc:MGI:2676309]	-1.3439	3.6512e-05	0.000782883
Adam12	protein_coding	ADAM metallopeptidase domain 12 [Source:MGI Symbol;Acc:MGI:105378]	-5.85119	3.69328e-05	0.000791117
Parva	protein_coding	parvin, alpha [Source:MGI Symbol;Acc:MGI:1931144]	-1.86026	3.70419e-05	0.000792668
C1qbp	protein_coding	complement component 1, q subcomponent binding protein [Source:MGI Symbol;Acc:MGI:1194505]	-1.19044	3.72846e-05	0.000797069
Slc7a8	protein_coding	solute carrier family 7 (cationic amino acid transporter, y+ system), member 8 [Source:MGI Symbol;Acc:MGI:1355323]	2.1187	3.74455e-05	0.000799715
Btg1	protein_coding	BTG anti-proliferation factor 1 [Source:MGI Symbol;Acc:MGI:88215]	-1.74064	3.82339e-05	0.000815345
A230004M16Rik	lncRNA	RIKEN cDNA A230004M16 gene [Source:MGI Symbol;Acc:MGI:2445050]	5.59203	3.8253e-05	0.000815345
Alpk1	protein_coding	alpha-kinase 1 [Source:MGI Symbol;Acc:MGI:1918731]	-2.07543	3.86591e-05	0.000823187
Gm43871	TEC	predicted gene, 43871 [Source:MGI Symbol;Acc:MGI:5690263]	9.03022	3.88445e-05	0.000826318
Ddx5	protein_coding	DEAD box helicase 5 [Source:MGI Symbol;Acc:MGI:105037]	-0.845231	3.89095e-05	0.000826885
Supt7l	protein_coding	SPT7-like, STAGA complex gamma subunit [Source:MGI Symbol;Acc:MGI:1919445]	-1.76357	3.91509e-05	0.000831196
Chst15	protein_coding	carbohydrate sulfotransferase 15 [Source:MGI Symbol;Acc:MGI:1924840]	-2.09463	3.94686e-05	0.000837116
Katna1	protein_coding	katanin p60 (ATPase-containing) subunit A1 [Source:MGI Symbol;Acc:MGI:1344353]	-1.4781	3.95669e-05	0.000838375
Mmp17	protein_coding	matrix metallopeptidase 17 [Source:MGI Symbol;Acc:MGI:1346076]	3.51017	4.11032e-05	0.000870071
Uchl1	protein_coding	ubiquitin carboxy-terminal hydrolase L1 [Source:MGI Symbol;Acc:MGI:103149]	2.50756	4.11746e-05	0.000870729
Apol9b	protein_coding	apolipoprotein L 9b [Source:MGI Symbol;Acc:MGI:1919148]	-8.92448	4.13251e-05	0.000872627
Lnx1	protein_coding	ligand of numb-protein X 1 [Source:MGI Symbol;Acc:MGI:1278335]	1.70392	4.13454e-05	0.000872627
Nell2	protein_coding	NEL-like 2 [Source:MGI Symbol;Acc:MGI:1858510]	2.2494	4.1429e-05	0.000873537
Dnajc27	protein_coding	DnaJ heat shock protein family (Hsp40) member C27 [Source:MGI Symbol;Acc:MGI:2443036]	1.39779	4.15391e-05	0.000873825
Wscd2	protein_coding	WSC domain containing 2 [Source:MGI Symbol;Acc:MGI:2445030]	2.51432	4.16034e-05	0.000873825
Gm48182	TEC	predicted gene, 48182 [Source:MGI Symbol;Acc:MGI:6097559]	2.29955	4.16163e-05	0.000873825
Aplp1	protein_coding	amyloid beta precursor like protein 1 [Source:MGI Symbol;Acc:MGI:88046]	2.67848	4.16414e-05	0.000873825
A330102I10Rik	lncRNA	RIKEN cDNA A330102I10 gene [Source:MGI Symbol;Acc:MGI:1925170]	4.77156	4.16455e-05	0.000873825
Plod1	protein_coding	procollagen-lysine, 2-oxoglutarate 5-dioxygenase 1 [Source:MGI Symbol;Acc:MGI:99907]	-1.37256	4.19707e-05	0.000879793
Six2	protein_coding	sine oculis-related homeobox 2 [Source:MGI Symbol;Acc:MGI:102778]	-10.1584	4.24635e-05	0.000888754
Gm56575	lncRNA	predicted gene, 56575 [Source:MGI Symbol;Acc:MGI:7337064]	-7.45604	4.25586e-05	0.000888754
Kcnk3	protein_coding	potassium channel, subfamily K, member 3 [Source:MGI Symbol;Acc:MGI:1100509]	2.67727	4.25832e-05	0.000888754
C030015E24Rik	TEC	RIKEN cDNA C030015E24 gene [Source:MGI Symbol;Acc:MGI:1924665]	3.96917	4.25974e-05	0.000888754
Kcnc2	protein_coding	potassium voltage gated channel, Shaw-related subfamily, member 2 [Source:MGI Symbol;Acc:MGI:96668]	3.81963	4.26044e-05	0.000888754
Gm38020	TEC	predicted gene, 38020 [Source:MGI Symbol;Acc:MGI:5611248]	2.20011	4.26525e-05	0.000888895
Sptbn2	protein_coding	spectrin beta, non-erythrocytic 2 [Source:MGI Symbol;Acc:MGI:1313261]	2.70316	4.27517e-05	0.000890103
E230029C05Rik	lncRNA	RIKEN cDNA E230029C05 gene [Source:MGI Symbol;Acc:MGI:2442580]	3.01153	4.29052e-05	0.000891584
C1ql3	protein_coding	C1q-like 3 [Source:MGI Symbol;Acc:MGI:2387350]	3.50307	4.29056e-05	0.000891584
Necab1	protein_coding	N-terminal EF-hand calcium binding protein 1 [Source:MGI Symbol;Acc:MGI:1916602]	2.48299	4.34052e-05	0.000901096
Col19a1	protein_coding	collagen, type XIX, alpha 1 [Source:MGI Symbol;Acc:MGI:1095415]	3.11231	4.37601e-05	0.00090759
Psd	protein_coding	pleckstrin and Sec7 domain containing [Source:MGI Symbol;Acc:MGI:1920978]	2.10773	4.38978e-05	0.000909572
Gnaz	protein_coding	guanine nucleotide binding protein, alpha z subunit [Source:MGI Symbol;Acc:MGI:95780]	3.13342	4.40886e-05	0.000912646
Fbxw9	protein_coding	F-box and WD-40 domain protein 9 [Source:MGI Symbol;Acc:MGI:1915878]	2.0525	4.45485e-05	0.000921283
Tlr13	protein_coding	toll-like receptor 13 [Source:MGI Symbol;Acc:MGI:3045213]	-8.98714	4.46707e-05	0.000922923
Cd9	protein_coding	CD9 antigen [Source:MGI Symbol;Acc:MGI:88348]	-2.16464	4.50787e-05	0.000930461
Fndc9	protein_coding	fibronectin type III domain containing 9 [Source:MGI Symbol;Acc:MGI:2443410]	5.21128	4.52321e-05	0.000932733
Gm20642	lncRNA	predicted gene 20642 [Source:MGI Symbol;Acc:MGI:5313089]	5.72714	4.52885e-05	0.000933004
Efna4	protein_coding	ephrin A4 [Source:MGI Symbol;Acc:MGI:106643]	-9.37481	4.55776e-05	0.000938062
Spry2	protein_coding	sprouty RTK signaling antagonist 2 [Source:MGI Symbol;Acc:MGI:1345138]	1.27023	4.58173e-05	0.000942096
Ablim2	protein_coding	actin-binding LIM protein 2 [Source:MGI Symbol;Acc:MGI:2385758]	1.52893	4.598e-05	0.00094441
Cdhr1	protein_coding	cadherin-related family member 1 [Source:MGI Symbol;Acc:MGI:2157782]	-9.04347	4.60174e-05	0.00094441
Slc25a38	protein_coding	solute carrier family 25, member 38 [Source:MGI Symbol;Acc:MGI:2384782]	-1.60646	4.67845e-05	0.000958387
Phldb2	protein_coding	pleckstrin homology like domain, family B, member 2 [Source:MGI Symbol;Acc:MGI:2444981]	-2.2673	4.67875e-05	0.000958387
Fkbp11	protein_coding	FK506 binding protein 11 [Source:MGI Symbol;Acc:MGI:1913370]	-6.63101	4.69692e-05	0.000961196
Celf2	protein_coding	CUGBP, Elav-like family member 2 [Source:MGI Symbol;Acc:MGI:1338822]	1.683	4.78119e-05	0.000977513
Vrk2	protein_coding	vaccinia related kinase 2 [Source:MGI Symbol;Acc:MGI:1917172]	-1.81127	4.78664e-05	0.000977699
B4galt6	protein_coding	UDP-Gal:betaGlcNAc beta 1,4-galactosyltransferase, polypeptide 6 [Source:MGI Symbol;Acc:MGI:1928380]	2.66059	4.8012e-05	0.000979745
Clstn3	protein_coding	calsyntenin 3 [Source:MGI Symbol;Acc:MGI:2178323]	2.28937	4.827e-05	0.000984078
Timp2	protein_coding	tissue inhibitor of metalloproteinase 2 [Source:MGI Symbol;Acc:MGI:98753]	-1.74498	4.83416e-05	0.000984607
Gm28299	processed_pseudogene	predicted gene 28299 [Source:MGI Symbol;Acc:MGI:5579005]	3.41587	4.86308e-05	0.000989562
Neurl1a	protein_coding	neuralized E3 ubiquitin protein ligase 1A [Source:MGI Symbol;Acc:MGI:1334263]	2.32371	4.90055e-05	0.000995993
Slc6a7	protein_coding	solute carrier family 6 (neurotransmitter transporter, L-proline), member 7 [Source:MGI Symbol;Acc:MGI:2147363]	3.76558	4.90394e-05	0.000995993
Gm50287	lncRNA	predicted gene, 50287 [Source:MGI Symbol;Acc:MGI:6303125]	5.02836	4.94145e-05	0.00100267
Six5	protein_coding	sine oculis-related homeobox 5 [Source:MGI Symbol;Acc:MGI:106220]	-3.00562	4.96359e-05	0.00100533
Sdr39u1	protein_coding	short chain dehydrogenase/reductase family 39U, member 1 [Source:MGI Symbol;Acc:MGI:1916876]	-1.2533	4.96391e-05	0.00100533
Coch	protein_coding	cochlin [Source:MGI Symbol;Acc:MGI:1278313]	-4.36615	4.97027e-05	0.00100559
Dapl1	protein_coding	death associated protein-like 1 [Source:MGI Symbol;Acc:MGI:1923997]	-13.1009	4.97454e-05	0.00100559
Slc7a3	protein_coding	solute carrier family 7 (cationic amino acid transporter, y+ system), member 3 [Source:MGI Symbol;Acc:MGI:1100521]	3.53043	4.98786e-05	0.00100734
Trim63	protein_coding	tripartite motif-containing 63 [Source:MGI Symbol;Acc:MGI:2447992]	-10.0366	4.99742e-05	0.00100833
Cntn2	protein_coding	contactin 2 [Source:MGI Symbol;Acc:MGI:104518]	3.31161	5.02142e-05	0.00101222
Smad9	protein_coding	SMAD family member 9 [Source:MGI Symbol;Acc:MGI:1859993]	-9.60473	5.02776e-05	0.00101255
Cmtr1	protein_coding	cap methyltransferase 1 [Source:MGI Symbol;Acc:MGI:1921407]	1.07194	5.0691e-05	0.00101992
Snrpd3	protein_coding	small nuclear ribonucleoprotein D3 [Source:MGI Symbol;Acc:MGI:1914582]	-1.5468	5.08704e-05	0.00102258
Adam23	protein_coding	a disintegrin and metallopeptidase domain 23 [Source:MGI Symbol;Acc:MGI:1345162]	2.57504	5.11947e-05	0.00102814
Ajm1	protein_coding	apical junction component 1 [Source:MGI Symbol;Acc:MGI:2685842]	2.19894	5.1244e-05	0.00102817
Nrgn	protein_coding	neurogranin [Source:MGI Symbol;Acc:MGI:1927184]	2.40133	5.15436e-05	0.00103322
Msx1	protein_coding	msh homeobox 1 [Source:MGI Symbol;Acc:MGI:97168]	-3.21482	5.16023e-05	0.00103344
Gm30489	lncRNA	predicted gene, 30489 [Source:MGI Symbol;Acc:MGI:5589648]	-4.06234	5.20588e-05	0.00104161
Gm43830	TEC	predicted gene 43830 [Source:MGI Symbol;Acc:MGI:5663967]	4.21005	5.22753e-05	0.00104497
Map7	protein_coding	microtubule-associated protein 7 [Source:MGI Symbol;Acc:MGI:1328328]	2.71587	5.23638e-05	0.00104506
Ccnd3	protein_coding	cyclin D3 [Source:MGI Symbol;Acc:MGI:88315]	-1.58284	5.23887e-05	0.00104506
F830016B08Rik	protein_coding	RIKEN cDNA F830016B08 gene [Source:MGI Symbol;Acc:MGI:3588218]	-9.11174	5.24254e-05	0.00104506
Fbxl7	protein_coding	F-box and leucine-rich repeat protein 7 [Source:MGI Symbol;Acc:MGI:3052506]	-3.45369	5.26436e-05	0.00104844
Pcdhga7	protein_coding	protocadherin gamma subfamily A, 7 [Source:MGI Symbol;Acc:MGI:1935219]	-2.28018	5.33863e-05	0.00106225
Svop	protein_coding	SV2 related protein [Source:MGI Symbol;Acc:MGI:1915916]	2.37007	5.38767e-05	0.00107102
Gm50094	TEC	predicted gene, 50094 [Source:MGI Symbol;Acc:MGI:6275431]	-9.28352	5.40126e-05	0.00107274
Mmp2	protein_coding	matrix metallopeptidase 2 [Source:MGI Symbol;Acc:MGI:97009]	-4.22609	5.4335e-05	0.00107814
Gm3828	processed_pseudogene	predicted gene 3828 [Source:MGI Symbol;Acc:MGI:3782000]	-6.92798	5.44914e-05	0.00108025
H2-T22	protein_coding	histocompatibility 2, T region locus 22 [Source:MGI Symbol;Acc:MGI:95956]	-1.44842	5.46533e-05	0.00108247
Fam163b	protein_coding	family with sequence similarity 163, member B [Source:MGI Symbol;Acc:MGI:1926106]	3.19902	5.47988e-05	0.00108435
Gnpda1	protein_coding	glucosamine-6-phosphate deaminase 1 [Source:MGI Symbol;Acc:MGI:1347054]	-2.0452	5.49284e-05	0.00108553
Pde6h	protein_coding	phosphodiesterase 6H, cGMP-specific, cone, gamma [Source:MGI Symbol;Acc:MGI:1925850]	-1.68773	5.49589e-05	0.00108553
Rspo3	protein_coding	R-spondin 3 [Source:MGI Symbol;Acc:MGI:1920030]	-5.2455	5.54265e-05	0.00109376
Gm42486	TEC	predicted gene 42486 [Source:MGI Symbol;Acc:MGI:5662623]	9.50335	5.57348e-05	0.00109884
Mamdc4	protein_coding	MAM domain containing 4 [Source:MGI Symbol;Acc:MGI:2685841]	-4.17611	5.62357e-05	0.0011077
Zfp551	protein_coding	zinc finger protein 551 [Source:MGI Symbol;Acc:MGI:3588205]	-9.56227	5.64441e-05	0.00110984
Ogn	protein_coding	osteoglycin [Source:MGI Symbol;Acc:MGI:109278]	-6.39223	5.64472e-05	0.00110984
Slc25a23	protein_coding	solute carrier family 25 (mitochondrial carrier; phosphate carrier), member 23 [Source:MGI Symbol;Acc:MGI:1914222]	1.87789	5.68599e-05	0.00111574
Gm43800	TEC	predicted gene 43800 [Source:MGI Symbol;Acc:MGI:5663937]	8.75777	5.6873e-05	0.00111574
Prxl2b	protein_coding	peroxiredoxin like 2B [Source:MGI Symbol;Acc:MGI:1913719]	1.81804	5.69028e-05	0.00111574
Ift57	protein_coding	intraflagellar transport 57 [Source:MGI Symbol;Acc:MGI:1921166]	-1.20499	5.72952e-05	0.00112241
Sec22a	protein_coding	SEC22 homolog A, vesicle trafficking protein [Source:MGI Symbol;Acc:MGI:2447876]	-1.247	5.7618e-05	0.00112771
Sorcs1	protein_coding	sortilin-related VPS10 domain containing receptor 1 [Source:MGI Symbol;Acc:MGI:1929666]	3.4489	5.88274e-05	0.00115034
Asphd2	protein_coding	aspartate beta-hydroxylase domain containing 2 [Source:MGI Symbol;Acc:MGI:1920148]	2.08968	5.92727e-05	0.00115799
Matk	protein_coding	megakaryocyte-associated tyrosine kinase [Source:MGI Symbol;Acc:MGI:99259]	2.67368	5.94482e-05	0.00116037
Pf4	protein_coding	platelet factor 4 [Source:MGI Symbol;Acc:MGI:1888711]	-3.16692	5.95875e-05	0.00116194
Rgs11	protein_coding	regulator of G-protein signaling 11 [Source:MGI Symbol;Acc:MGI:1354739]	2.6612	5.96365e-05	0.00116194
Gm43192	lncRNA	predicted gene 43192 [Source:MGI Symbol;Acc:MGI:5663329]	7.76603	6.00574e-05	0.00116908
Zfp518b	protein_coding	zinc finger protein 518B [Source:MGI Symbol;Acc:MGI:2140750]	-3.20735	6.03354e-05	0.00117344
Pirb	protein_coding	paired Ig-like receptor B [Source:MGI Symbol;Acc:MGI:894311]	-8.89649	6.04117e-05	0.00117386
Nox1	protein_coding	NADPH oxidase 1 [Source:MGI Symbol;Acc:MGI:2450016]	2.11362	6.07999e-05	0.00117985
Mical2	protein_coding	microtubule associated monooxygenase, calponin and LIM domain containing 2 [Source:MGI Symbol;Acc:MGI:2444947]	1.61744	6.08292e-05	0.00117985
Slc35f3	protein_coding	solute carrier family 35, member F3 [Source:MGI Symbol;Acc:MGI:2444426]	3.37287	6.1013e-05	0.00118235
Txndc15	protein_coding	thioredoxin domain containing 15 [Source:MGI Symbol;Acc:MGI:1916922]	-0.838369	6.10879e-05	0.00118273
Gm44036	lncRNA	predicted gene, 44036 [Source:MGI Symbol;Acc:MGI:5690428]	-1.76123	6.13184e-05	0.00118613
Gm37792	TEC	predicted gene, 37792 [Source:MGI Symbol;Acc:MGI:5611020]	9.91457	6.16748e-05	0.00119182
Dnm1	protein_coding	dynamin 1 [Source:MGI Symbol;Acc:MGI:107384]	2.34039	6.17265e-05	0.00119182
Tgfb1i1	protein_coding	transforming growth factor beta 1 induced transcript 1 [Source:MGI Symbol;Acc:MGI:102784]	-1.30825	6.18329e-05	0.00119182
Neurod2	protein_coding	neurogenic differentiation 2 [Source:MGI Symbol;Acc:MGI:107755]	2.9934	6.18336e-05	0.00119182
Gm42639	TEC	predicted gene 42639 [Source:MGI Symbol;Acc:MGI:5662776]	2.86023	6.18974e-05	0.00119198
Sh3gl3	protein_coding	SH3-domain GRB2-like 3 [Source:MGI Symbol;Acc:MGI:700011]	-2.5645	6.19605e-05	0.00119213
Hs3st1	protein_coding	heparan sulfate (glucosamine) 3-O-sulfotransferase 1 [Source:MGI Symbol;Acc:MGI:1201606]	-2.35612	6.23931e-05	0.00119938
Fam118b	protein_coding	family with sequence similarity 118, member B [Source:MGI Symbol;Acc:MGI:1924483]	-1.5721	6.31134e-05	0.00121215
Nub1	protein_coding	negative regulator of ubiquitin-like proteins 1 [Source:MGI Symbol;Acc:MGI:1889001]	-0.793051	6.33514e-05	0.00121564
Postn	protein_coding	periostin, osteoblast specific factor [Source:MGI Symbol;Acc:MGI:1926321]	-9.52877	6.36348e-05	0.00121999
Rps29	protein_coding	ribosomal protein S29 [Source:MGI Symbol;Acc:MGI:107681]	1.40028	6.37057e-05	0.00122026
Phf24	protein_coding	PHD finger protein 24 [Source:MGI Symbol;Acc:MGI:2140712]	2.63681	6.43205e-05	0.00123094
Gm20208	lncRNA	predicted gene, 20208 [Source:MGI Symbol;Acc:MGI:5012393]	3.20959	6.44283e-05	0.00123191
Susd6	protein_coding	sushi domain containing 6 [Source:MGI Symbol;Acc:MGI:2444661]	-2.21859	6.45061e-05	0.00123231
Wdr47	protein_coding	WD repeat domain 47 [Source:MGI Symbol;Acc:MGI:2139593]	1.79228	6.4791e-05	0.00123665
Cplx1	protein_coding	complexin 1 [Source:MGI Symbol;Acc:MGI:104727]	2.86877	6.54893e-05	0.00124888
Naga	protein_coding	N-acetyl galactosaminidase, alpha [Source:MGI Symbol;Acc:MGI:1261422]	-1.35833	6.5567e-05	0.00124925
Rimkla	protein_coding	ribosomal modification protein rimK-like family member A [Source:MGI Symbol;Acc:MGI:3040686]	6.75915	6.57914e-05	0.00125242
Nrg3os	lncRNA	neuregulin 3, opposite strand [Source:MGI Symbol;Acc:MGI:1922420]	5.23303	6.60556e-05	0.00125634
Pabpc4l	protein_coding	poly(A) binding protein, cytoplasmic 4-like [Source:MGI Symbol;Acc:MGI:3643087]	-9.26348	6.72987e-05	0.00127885
Clec2l	protein_coding	C-type lectin domain family 2, member L [Source:MGI Symbol;Acc:MGI:2141402]	3.56364	6.73771e-05	0.00127921
Hacd4	protein_coding	3-hydroxyacyl-CoA dehydratase 4 [Source:MGI Symbol;Acc:MGI:1914025]	-1.8822	6.77391e-05	0.00128483
Arhgap33	protein_coding	Rho GTPase activating protein 33 [Source:MGI Symbol;Acc:MGI:2673998]	2.23917	6.77922e-05	0.00128483
Sytl1	protein_coding	synaptotagmin-like 1 [Source:MGI Symbol;Acc:MGI:1933365]	-9.18817	6.79137e-05	0.001286
Pak3	protein_coding	p21 (RAC1) activated kinase 3 [Source:MGI Symbol;Acc:MGI:1339656]	3.32699	6.7999e-05	0.00128649
Dusp8	protein_coding	dual specificity phosphatase 8 [Source:MGI Symbol;Acc:MGI:106626]	2.14565	6.81256e-05	0.00128775
Bbln	protein_coding	bublin coiled coil protein [Source:MGI Symbol;Acc:MGI:1920987]	1.19267	6.87825e-05	0.00129903
Pdzd11	protein_coding	PDZ domain containing 11 [Source:MGI Symbol;Acc:MGI:1919871]	-1.01717	6.9769e-05	0.00131651
Pak6	protein_coding	p21 (RAC1) activated kinase 6 [Source:MGI Symbol;Acc:MGI:2679420]	2.82078	7.00347e-05	0.00132037
Nr3c2	protein_coding	nuclear receptor subfamily 3, group C, member 2 [Source:MGI Symbol;Acc:MGI:99459]	-2.58293	7.02367e-05	0.00132302
Elovl1	protein_coding	ELOVL fatty acid elongase 1 [Source:MGI Symbol;Acc:MGI:1858959]	-1.46343	7.08541e-05	0.00133348
Eif4a1	protein_coding	eukaryotic translation initiation factor 4A1 [Source:MGI Symbol;Acc:MGI:95303]	-1.02332	7.09799e-05	0.00133456
Muc15	protein_coding	mucin 15 [Source:MGI Symbol;Acc:MGI:2442110]	6.59207	7.10352e-05	0.00133456
Hes1	protein_coding	hes family bHLH transcription factor 1 [Source:MGI Symbol;Acc:MGI:104853]	-2.51178	7.13472e-05	0.00133925
Gm7240	transcribed_processed_pseudogene	predicted gene 7240 [Source:MGI Symbol;Acc:MGI:3643235]	-6.75404	7.15e-05	0.00134095
B3gat1	protein_coding	beta-1,3-glucuronyltransferase 1 [Source:MGI Symbol;Acc:MGI:1924148]	2.66338	7.20005e-05	0.00134893
A230065N10Rik	lncRNA	RIKEN cDNA A230065N10 gene [Source:MGI Symbol;Acc:MGI:3642744]	3.35918	7.20507e-05	0.00134893
Gm19426	lncRNA	predicted gene, 19426 [Source:MGI Symbol;Acc:MGI:5011611]	-8.30526	7.2491e-05	0.00135485
Ovol2	protein_coding	ovo like zinc finger 2 [Source:MGI Symbol;Acc:MGI:1338039]	10.2758	7.24923e-05	0.00135485
Tec	protein_coding	tec protein tyrosine kinase [Source:MGI Symbol;Acc:MGI:98662]	-2.57346	7.31107e-05	0.00136522
Adora1	protein_coding	adenosine A1 receptor [Source:MGI Symbol;Acc:MGI:99401]	2.99515	7.37114e-05	0.00137524
Me2	protein_coding	malic enzyme 2, NAD(+)-dependent, mitochondrial [Source:MGI Symbol;Acc:MGI:2147351]	-1.44685	7.40346e-05	0.00138008
Gstm2	protein_coding	glutathione S-transferase, mu 2 [Source:MGI Symbol;Acc:MGI:95861]	-2.54164	7.44876e-05	0.00138732
Tmem191	protein_coding	transmembrane protein 191 [Source:MGI Symbol;Acc:MGI:107238]	1.69395	7.49771e-05	0.00139523
Ggact	protein_coding	gamma-glutamylamine cyclotransferase [Source:MGI Symbol;Acc:MGI:2385008]	-1.86163	7.52244e-05	0.00139863
Akap6	protein_coding	A kinase anchor protein 6 [Source:MGI Symbol;Acc:MGI:3050566]	2.86908	7.53333e-05	0.00139945
Chn1os1	lncRNA	chimerin 1, opposite strand 1 [Source:MGI Symbol;Acc:MGI:3702041]	2.51071	7.5431e-05	0.00140005
Gm34583	transcribed_processed_pseudogene	predicted gene, 34583 [Source:MGI Symbol;Acc:MGI:5593742]	3.2786	7.56413e-05	0.00140275
Gask1b	protein_coding	golgi associated kinase 1B [Source:MGI Symbol;Acc:MGI:1915909]	-3.57596	7.60208e-05	0.00140857
Pcdhga3	protein_coding	protocadherin gamma subfamily A, 3 [Source:MGI Symbol;Acc:MGI:1935215]	-6.05784	7.66618e-05	0.00141923
Phf21b	protein_coding	PHD finger protein 21B [Source:MGI Symbol;Acc:MGI:2443812]	3.91173	7.67375e-05	0.00141941
Prkce	protein_coding	protein kinase C, epsilon [Source:MGI Symbol;Acc:MGI:97599]	1.78232	7.68253e-05	0.00141982
Rnf13	protein_coding	ring finger protein 13 [Source:MGI Symbol;Acc:MGI:1346341]	-1.20041	7.72885e-05	0.00142715
Srgap3	protein_coding	SLIT-ROBO Rho GTPase activating protein 3 [Source:MGI Symbol;Acc:MGI:2152938]	1.55263	7.74951e-05	0.00142974
Tmem168	protein_coding	transmembrane protein 168 [Source:MGI Symbol;Acc:MGI:1921794]	-1.26181	7.77158e-05	0.00143259
2810405F17Rik	lncRNA	RIKEN cDNA 2810405F17 gene [Source:MGI Symbol;Acc:MGI:1917225]	-4.57697	7.78995e-05	0.00143475
Ppfia3	protein_coding	protein tyrosine phosphatase, receptor type, f polypeptide (PTPRF), interacting protein (liprin), alpha 3 [Source:MGI Symbol;Acc:MGI:1924037]	2.92201	7.79697e-05	0.00143482
Marchf4	protein_coding	membrane associated ring-CH-type finger 4 [Source:MGI Symbol;Acc:MGI:2683550]	5.64372	7.84318e-05	0.00144209
Gm37895	TEC	predicted gene, 37895 [Source:MGI Symbol;Acc:MGI:5611123]	3.18804	7.93257e-05	0.00145728
Zfp36l2	protein_coding	zinc finger protein 36, C3H type-like 2 [Source:MGI Symbol;Acc:MGI:107945]	-1.89049	7.98842e-05	0.00146629
Rab6b	protein_coding	RAB6B, member RAS oncogene family [Source:MGI Symbol;Acc:MGI:107283]	2.12604	8.02463e-05	0.00147168
Fam20c	protein_coding	FAM20C, golgi associated secretory pathway kinase [Source:MGI Symbol;Acc:MGI:2136853]	-2.36556	8.0543e-05	0.00147587
Gstt1	protein_coding	glutathione S-transferase, theta 1 [Source:MGI Symbol;Acc:MGI:107379]	-1.96834	8.24627e-05	0.00150976
Dusp15	protein_coding	dual specificity phosphatase-like 15 [Source:MGI Symbol;Acc:MGI:1934928]	3.7429	8.25371e-05	0.00150984
Flnc	protein_coding	filamin C, gamma [Source:MGI Symbol;Acc:MGI:95557]	-7.89468	8.30091e-05	0.00151578
Gm19817	TEC	predicted gene, 19817 [Source:MGI Symbol;Acc:MGI:5012002]	3.80157	8.30385e-05	0.00151578
Wipf3	protein_coding	WAS/WASL interacting protein family, member 3 [Source:MGI Symbol;Acc:MGI:3044681]	3.73099	8.3073e-05	0.00151578
Gm44241	TEC	predicted gene, 44241 [Source:MGI Symbol;Acc:MGI:5690633]	4.64662	8.32162e-05	0.00151681
Gm5970	processed_pseudogene	predicted gene 5970 [Source:MGI Symbol;Acc:MGI:3646761]	-6.66733	8.32702e-05	0.00151681
Lrrc25	protein_coding	leucine rich repeat containing 25 [Source:MGI Symbol;Acc:MGI:2445284]	-9.11801	8.50598e-05	0.00154723
Rnmt	protein_coding	RNA (guanine-7-) methyltransferase [Source:MGI Symbol;Acc:MGI:1915147]	1.15084	8.51177e-05	0.00154723
Gm29650	lncRNA	predicted gene 29650 [Source:MGI Symbol;Acc:MGI:5580356]	-7.72581	8.51552e-05	0.00154723
Inha	protein_coding	inhibin alpha [Source:MGI Symbol;Acc:MGI:96569]	2.76066	8.53147e-05	0.00154882
Zic2	protein_coding	zinc finger protein of the cerebellum 2 [Source:MGI Symbol;Acc:MGI:106679]	-4.40447	8.55251e-05	0.00155133
Zfp951	protein_coding	zinc finger protein 951 [Source:MGI Symbol;Acc:MGI:2441896]	-8.76544	8.58568e-05	0.00155476
Slc25a27	protein_coding	solute carrier family 25, member 27 [Source:MGI Symbol;Acc:MGI:1921261]	2.23486	8.58583e-05	0.00155476
Ror2	protein_coding	receptor tyrosine kinase-like orphan receptor 2 [Source:MGI Symbol;Acc:MGI:1347521]	-9.95649	8.66226e-05	0.00156728
Timm22	protein_coding	translocase of inner mitochondrial membrane 22 [Source:MGI Symbol;Acc:MGI:1929742]	-1.11122	8.69073e-05	0.00157111
Gm31749	lncRNA	predicted gene, 31749 [Source:MGI Symbol;Acc:MGI:5590908]	8.36154	8.71935e-05	0.00157496
B830012L14Rik	lncRNA	RIKEN cDNA B830012L14 gene [Source:MGI Symbol;Acc:MGI:2443332]	3.36169	8.76833e-05	0.00158248
Apobec3	protein_coding	apolipoprotein B mRNA editing enzyme, catalytic polypeptide 3 [Source:MGI Symbol;Acc:MGI:1933111]	-1.64543	8.77844e-05	0.00158259
Gm54482	miRNA	predicted gene, 54482 [Source:MGI Symbol;Acc:MGI:6845444]	6.85509	8.78361e-05	0.00158259
Kcnc4	protein_coding	potassium voltage gated channel, Shaw-related subfamily, member 4 [Source:MGI Symbol;Acc:MGI:96670]	3.89035	8.82668e-05	0.00158902
Itpka	protein_coding	inositol 1,4,5-trisphosphate 3-kinase A [Source:MGI Symbol;Acc:MGI:1333822]	3.44168	8.83911e-05	0.00158993
Nudt22	protein_coding	nudix hydrolase 22 [Source:MGI Symbol;Acc:MGI:1915573]	-1.83258	8.85576e-05	0.0015916
Gm47704	TEC	predicted gene, 47704 [Source:MGI Symbol;Acc:MGI:6096820]	4.42613	8.9206e-05	0.00160192
Car13	protein_coding	carbonic anhydrase 13 [Source:MGI Symbol;Acc:MGI:1931322]	-12.9864	8.94339e-05	0.00160467
D630033A02Rik	transcribed_processed_pseudogene	RIKEN cDNA D630033A02 gene [Source:MGI Symbol;Acc:MGI:3028060]	-6.77625	9.02514e-05	0.00161799
Evc	protein_coding	EvC ciliary complex subunit 1 [Source:MGI Symbol;Acc:MGI:1890596]	-2.3646	9.1345e-05	0.00163624
Dnajb6	protein_coding	DnaJ heat shock protein family (Hsp40) member B6 [Source:MGI Symbol;Acc:MGI:1344381]	-0.981065	9.19801e-05	0.00164625
Me3	protein_coding	malic enzyme 3, NADP(+)-dependent, mitochondrial [Source:MGI Symbol;Acc:MGI:1916679]	2.26165	9.21601e-05	0.0016481
Mast3	protein_coding	microtubule associated serine/threonine kinase 3 [Source:MGI Symbol;Acc:MGI:2683541]	1.89924	9.23638e-05	0.00165037
Grn	protein_coding	granulin [Source:MGI Symbol;Acc:MGI:95832]	-1.19315	9.25041e-05	0.00165151
Fv1	protein_coding	Friend virus susceptibility 1 [Source:MGI Symbol;Acc:MGI:95595]	-7.22277	9.26649e-05	0.00165301
Gm48967	TEC	predicted gene, 48967 [Source:MGI Symbol;Acc:MGI:6118304]	3.44193	9.28913e-05	0.00165448
Gm14218	lncRNA	predicted gene 14218 [Source:MGI Symbol;Acc:MGI:3650517]	7.24826	9.29754e-05	0.00165448
Gm14703	lncRNA	predicted gene 14703 [Source:MGI Symbol;Acc:MGI:3705165]	1.95736	9.29779e-05	0.00165448
Grm1	protein_coding	glutamate receptor, metabotropic 1 [Source:MGI Symbol;Acc:MGI:1351338]	3.88964	9.3066e-05	0.00165469
Snhg8	lncRNA	small nucleolar RNA host gene 8 [Source:MGI Symbol;Acc:MGI:1917145]	1.56855	9.31581e-05	0.00165496
Cttnbp2	protein_coding	cortactin binding protein 2 [Source:MGI Symbol;Acc:MGI:1353467]	2.36164	9.32772e-05	0.00165571
Septin8	protein_coding	septin 8 [Source:MGI Symbol;Acc:MGI:894310]	1.1622	9.38161e-05	0.0016639
Hs3st4	protein_coding	heparan sulfate (glucosamine) 3-O-sulfotransferase 4 [Source:MGI Symbol;Acc:MGI:1333792]	3.99542	9.42937e-05	0.00167042
Pitpnm1	protein_coding	phosphatidylinositol transfer protein, membrane-associated 1 [Source:MGI Symbol;Acc:MGI:1197524]	2.01818	9.43387e-05	0.00167042
Zfp992	protein_coding	zinc finger protein 992 [Source:MGI Symbol;Acc:MGI:3700963]	-7.32959	9.44801e-05	0.00167155
Gm16541	lncRNA	predicted gene 16541 [Source:MGI Symbol;Acc:MGI:4414961]	-2.46387	9.46285e-05	0.0016728
Gm31087	lncRNA	predicted gene, 31087 [Source:MGI Symbol;Acc:MGI:5590246]	3.74865	9.50736e-05	0.0016793
Xpnpep2	protein_coding	X-prolyl aminopeptidase (aminopeptidase P) 2, membrane-bound [Source:MGI Symbol;Acc:MGI:2180001]	-10.0004	9.52903e-05	0.00168071
Cd248	protein_coding	CD248 antigen, endosialin [Source:MGI Symbol;Acc:MGI:1917695]	-2.3083	9.53096e-05	0.00168071
Satb1	protein_coding	special AT-rich sequence binding protein 1 [Source:MGI Symbol;Acc:MGI:105084]	2.26495	9.54499e-05	0.00168181
Fbxw7	protein_coding	F-box and WD-40 domain protein 7 [Source:MGI Symbol;Acc:MGI:1354695]	1.74426	9.58404e-05	0.00168618
1700025G04Rik	protein_coding	RIKEN cDNA 1700025G04 gene [Source:MGI Symbol;Acc:MGI:1916649]	2.07685	9.58785e-05	0.00168618
Klhl25	protein_coding	kelch-like 25 [Source:MGI Symbol;Acc:MGI:2668031]	1.4829	9.60447e-05	0.00168618
Eif3i	protein_coding	eukaryotic translation initiation factor 3, subunit I [Source:MGI Symbol;Acc:MGI:1860763]	-0.763946	9.60813e-05	0.00168618
Gm42767	TEC	predicted gene 42767 [Source:MGI Symbol;Acc:MGI:5662904]	4.22918	9.61057e-05	0.00168618
Dop1b	protein_coding	DOP1 leucine zipper like protein B [Source:MGI Symbol;Acc:MGI:1917278]	1.24751	9.61776e-05	0.00168618
A330076H08Rik	lncRNA	RIKEN cDNA A330076H08 gene [Source:MGI Symbol;Acc:MGI:2443193]	2.33386	9.63008e-05	0.00168618
Mir9-2hg	lncRNA	Mir9-2 host gene [Source:MGI Symbol;Acc:MGI:2443574]	2.36241	9.63243e-05	0.00168618
Glipr2	protein_coding	GLI pathogenesis-related 2 [Source:MGI Symbol;Acc:MGI:1917770]	-1.71977	9.66152e-05	0.00168922
Gjb2	protein_coding	gap junction protein, beta 2 [Source:MGI Symbol;Acc:MGI:95720]	-4.19026	9.66544e-05	0.00168922
Mcmdc2	protein_coding	minichromosome maintenance domain containing 2 [Source:MGI Symbol;Acc:MGI:3045334]	4.7425	9.70513e-05	0.00169478
Camk2n1	protein_coding	calcium/calmodulin-dependent protein kinase II inhibitor 1 [Source:MGI Symbol;Acc:MGI:1913509]	2.26184	9.77354e-05	0.00170534
Ryr2	protein_coding	ryanodine receptor 2, cardiac [Source:MGI Symbol;Acc:MGI:99685]	3.1493	9.83554e-05	0.00171477
Cpa3	protein_coding	carboxypeptidase A3, mast cell [Source:MGI Symbol;Acc:MGI:88479]	-17.2753	9.92783e-05	0.00172947
St8sia1	protein_coding	ST8 alpha-N-acetyl-neuraminide alpha-2,8-sialyltransferase 1 [Source:MGI Symbol;Acc:MGI:106011]	4.45966	9.95693e-05	0.00173313
AI504432	lncRNA	expressed sequence AI504432 [Source:MGI Symbol;Acc:MGI:2139742]	2.7614	9.9949e-05	0.00173834
Gm14776	processed_pseudogene	predicted gene 14776 [Source:MGI Symbol;Acc:MGI:3705559]	2.86959	0.000100158	0.00174058
Gm37296	TEC	predicted gene, 37296 [Source:MGI Symbol;Acc:MGI:5610524]	-8.98123	0.000100325	0.00174207
Pmp22	protein_coding	peripheral myelin protein 22 [Source:MGI Symbol;Acc:MGI:97631]	-2.17816	0.000101412	0.00175952
Gm10115	lncRNA	predicted gene 10115 [Source:MGI Symbol;Acc:MGI:3641675]	2.41113	0.000101866	0.00176598
Gm43873	TEC	predicted gene, 43873 [Source:MGI Symbol;Acc:MGI:5690265]	8.82949	0.000102119	0.00176895
Tmeff1	protein_coding	transmembrane protein with EGF-like and two follistatin-like domains 1 [Source:MGI Symbol;Acc:MGI:1926810]	1.86288	0.000102276	0.00177024
Smcr8	protein_coding	Smith-Magenis syndrome chromosome region, candidate 8 homolog (human) [Source:MGI Symbol;Acc:MGI:2444720]	-3.61009	0.000102628	0.0017749
Nsmf	protein_coding	NMDA receptor synaptonuclear signaling and neuronal migration factor [Source:MGI Symbol;Acc:MGI:1861755]	1.859	0.000103425	0.00178726
Tmem132a	protein_coding	transmembrane protein 132A [Source:MGI Symbol;Acc:MGI:2147810]	2.00805	0.000103531	0.00178765
Lrfn1	protein_coding	leucine rich repeat and fibronectin type III domain containing 1 [Source:MGI Symbol;Acc:MGI:2136810]	3.55721	0.000103977	0.00179391
Ggt7	protein_coding	gamma-glutamyltransferase 7 [Source:MGI Symbol;Acc:MGI:1913385]	1.78278	0.000104067	0.00179404
Tmem51os1	lncRNA	Tmem51 opposite strand 1 [Source:MGI Symbol;Acc:MGI:3642733]	-2.45422	0.00010434	0.00179729
Myocos	protein_coding	myocilin opposite strand [Source:MGI Symbol;Acc:MGI:3642786]	-9.77639	0.000104947	0.00180631
Gm48700	TEC	predicted gene, 48700 [Source:MGI Symbol;Acc:MGI:6098336]	2.70345	0.000105285	0.00181068
Gm41609	lncRNA	predicted gene, 41609 [Source:MGI Symbol;Acc:MGI:5624494]	3.20275	0.000106039	0.0018222
Cuta	protein_coding	cutA divalent cation tolerance homolog [Source:MGI Symbol;Acc:MGI:1914925]	-0.891019	0.000106304	0.00182529
Anxa1	protein_coding	annexin A1 [Source:MGI Symbol;Acc:MGI:96819]	-3.72982	0.000108704	0.00186502
Khdrbs2	protein_coding	KH domain containing, RNA binding, signal transduction associated 2 [Source:MGI Symbol;Acc:MGI:2159649]	4.74322	0.000108806	0.00186529
Tax1bp3	protein_coding	Tax1 (human T cell leukemia virus type I) binding protein 3 [Source:MGI Symbol;Acc:MGI:1923531]	-1.28161	0.000109873	0.00188207
Spag7	protein_coding	sperm associated antigen 7 [Source:MGI Symbol;Acc:MGI:107380]	-1.42367	0.000110117	0.00188477
Nt5dc2	protein_coding	5'-nucleotidase domain containing 2 [Source:MGI Symbol;Acc:MGI:1917271]	-2.19423	0.000110641	0.00189222
Sdk2	protein_coding	sidekick cell adhesion molecule 2 [Source:MGI Symbol;Acc:MGI:2443847]	2.65756	0.000110953	0.00189605
B3galt2	protein_coding	UDP-Gal:betaGlcNAc beta 1,3-galactosyltransferase, polypeptide 2 [Source:MGI Symbol;Acc:MGI:1349461]	2.70856	0.000111346	0.00190127
A830018L16Rik	protein_coding	RIKEN cDNA A830018L16 gene [Source:MGI Symbol;Acc:MGI:2444149]	3.74241	0.000111828	0.00190799
Tmem98	protein_coding	transmembrane protein 98 [Source:MGI Symbol;Acc:MGI:1923457]	-1.37985	0.000111936	0.00190832
Gm16208	lncRNA	predicted gene 16208 [Source:MGI Symbol;Acc:MGI:3802096]	7.96071	0.000113047	0.00192573
Resp18	protein_coding	regulated endocrine-specific protein 18 [Source:MGI Symbol;Acc:MGI:1098222]	3.37238	0.000113225	0.00192724
9430031K09Rik	TEC	RIKEN cDNA 9430031K09 gene [Source:MGI Symbol;Acc:MGI:1924503]	8.75917	0.000113796	0.00193543
A2m	protein_coding	alpha-2-macroglobulin [Source:MGI Symbol;Acc:MGI:2449119]	-4.64831	0.000114506	0.00194597
Astn1	protein_coding	astrotactin 1 [Source:MGI Symbol;Acc:MGI:1098567]	2.50171	0.000115124	0.00195493
Tram1	protein_coding	translocating chain-associating membrane protein 1 [Source:MGI Symbol;Acc:MGI:1919515]	-1.59402	0.000116162	0.001971
Hcrtr2	protein_coding	hypocretin (orexin) receptor 2 [Source:MGI Symbol;Acc:MGI:2680765]	8.21905	0.000116521	0.00197554
Macroh2a2	protein_coding	macroH2A.2 histone [Source:MGI Symbol;Acc:MGI:3037658]	-1.93066	0.000116767	0.00197815
Bysl	protein_coding	bystin-like [Source:MGI Symbol;Acc:MGI:1858419]	-1.44759	0.000117096	0.00198218
Scpep1	protein_coding	serine carboxypeptidase 1 [Source:MGI Symbol;Acc:MGI:1921867]	-2.44838	0.000117345	0.00198482
Miat	lncRNA	myocardial infarction associated transcript (non-protein coding) [Source:MGI Symbol;Acc:MGI:2444886]	2.26569	0.000117587	0.00198736
Ifitm1	protein_coding	interferon induced transmembrane protein 1 [Source:MGI Symbol;Acc:MGI:1915963]	-2.88755	0.000118293	0.00199772
Gm9962	lncRNA	predicted gene 9962 [Source:MGI Symbol;Acc:MGI:3642695]	8.3465	0.000119034	0.00200866
Tnfrsf1a	protein_coding	tumor necrosis factor receptor superfamily, member 1a [Source:MGI Symbol;Acc:MGI:1314884]	-2.7	0.00012055	0.00203265
Fzd5	protein_coding	frizzled class receptor 5 [Source:MGI Symbol;Acc:MGI:108571]	-7.77318	0.000121566	0.00204818
Cyp4x1	protein_coding	cytochrome P450, family 4, subfamily x, polypeptide 1 [Source:MGI Symbol;Acc:MGI:1932403]	6.19568	0.00012184	0.0020512
Cep83	protein_coding	centrosomal protein 83 [Source:MGI Symbol;Acc:MGI:1924298]	1.34889	0.000122356	0.00205827
Cd164	protein_coding	CD164 antigen [Source:MGI Symbol;Acc:MGI:1859568]	-1.79356	0.000122798	0.00206171
Gusb	protein_coding	glucuronidase, beta [Source:MGI Symbol;Acc:MGI:95872]	-1.35331	0.000122841	0.00206171
4933406I18Rik	lncRNA	RIKEN cDNA 4933406I18 gene [Source:MGI Symbol;Acc:MGI:1918295]	8.43931	0.000122847	0.00206171
Lamp5	protein_coding	lysosomal-associated membrane protein family, member 5 [Source:MGI Symbol;Acc:MGI:1923411]	3.0191	0.000123678	0.00207404
Batf	protein_coding	basic leucine zipper transcription factor, ATF-like [Source:MGI Symbol;Acc:MGI:1859147]	-2.45584	0.000124076	0.00207909
Emp3	protein_coding	epithelial membrane protein 3 [Source:MGI Symbol;Acc:MGI:1098729]	-3.32795	0.000124692	0.00208778
Bad	protein_coding	BCL2-associated agonist of cell death [Source:MGI Symbol;Acc:MGI:1096330]	-1.53102	0.000125011	0.00209151
Kif4	protein_coding	kinesin family member 4 [Source:MGI Symbol;Acc:MGI:108389]	-1.90859	0.000125341	0.00209525
Pcdh17	protein_coding	protocadherin 17 [Source:MGI Symbol;Acc:MGI:2684924]	2.51202	0.000125429	0.00209525
Gatc	protein_coding	glutamyl-tRNA amidotransferase subunit C [Source:MGI Symbol;Acc:MGI:1923776]	-1.19822	0.000126097	0.00210478
Tspoap1	protein_coding	TSPO associated protein 1 [Source:MGI Symbol;Acc:MGI:2450877]	2.09001	0.000126232	0.0021054
Gm57383	lncRNA	predicted gene, 57383 [Source:MGI Symbol;Acc:MGI:7338679]	-1.84704	0.000128083	0.00213377
Bcat2	protein_coding	branched chain aminotransferase 2, mitochondrial [Source:MGI Symbol;Acc:MGI:1276534]	-1.9077	0.000128131	0.00213377
Gpr165	protein_coding	G protein-coupled receptor 165 [Source:MGI Symbol;Acc:MGI:1923456]	-6.99802	0.000128918	0.00214521
Cdh3	protein_coding	cadherin 3 [Source:MGI Symbol;Acc:MGI:88356]	-9.9186	0.000129025	0.00214533
Hipk2	protein_coding	homeodomain interacting protein kinase 2 [Source:MGI Symbol;Acc:MGI:1314872]	2.01015	0.000129656	0.00215416
Abcf2	protein_coding	ATP-binding cassette, sub-family F member 2 [Source:MGI Symbol;Acc:MGI:1351657]	-0.625125	0.000130284	0.00216294
Shisa7	protein_coding	shisa family member 7 [Source:MGI Symbol;Acc:MGI:3605641]	2.69824	0.000130888	0.00217129
Scn3b	protein_coding	sodium channel, voltage-gated, type III, beta [Source:MGI Symbol;Acc:MGI:1918882]	3.51538	0.000132515	0.00219658
Tafa1	protein_coding	TAFA chemokine like family member 1 [Source:MGI Symbol;Acc:MGI:2443695]	3.32255	0.000132761	0.00219898
Kif1a	protein_coding	kinesin family member 1A [Source:MGI Symbol;Acc:MGI:108391]	2.58594	0.000133154	0.00220379
Zmynd8	protein_coding	zinc finger, MYND-type containing 8 [Source:MGI Symbol;Acc:MGI:1918025]	1.10754	0.00013336	0.0022055
Cacnb1	protein_coding	calcium channel, voltage-dependent, beta 1 subunit [Source:MGI Symbol;Acc:MGI:102522]	1.41995	0.000133667	0.00220888
Lgi3	protein_coding	leucine-rich repeat LGI family, member 3 [Source:MGI Symbol;Acc:MGI:2182619]	4.32585	0.000133785	0.00220915
Gm37498	TEC	predicted gene, 37498 [Source:MGI Symbol;Acc:MGI:5610726]	-9.80355	0.000134065	0.00221157
Gm44896	TEC	predicted gene 44896 [Source:MGI Symbol;Acc:MGI:5753472]	4.71834	0.000134137	0.00221157
Ska2	protein_coding	spindle and kinetochore associated complex subunit 2 [Source:MGI Symbol;Acc:MGI:1913390]	-1.49373	0.000134366	0.00221365
Gm48261	TEC	predicted gene, 48261 [Source:MGI Symbol;Acc:MGI:6097679]	4.99924	0.000134861	0.00221937
Sphk1	protein_coding	sphingosine kinase 1 [Source:MGI Symbol;Acc:MGI:1316649]	-4.99274	0.000134919	0.00221937
Slc16a9	protein_coding	solute carrier family 16 (monocarboxylic acid transporters), member 9 [Source:MGI Symbol;Acc:MGI:1914109]	-2.63976	0.000135583	0.00222691
Casp6	protein_coding	caspase 6 [Source:MGI Symbol;Acc:MGI:1312921]	-1.96684	0.000135584	0.00222691
Rpl37	protein_coding	ribosomal protein L37 [Source:MGI Symbol;Acc:MGI:1914531]	1.3339	0.000135934	0.00223095
Wbp1l	protein_coding	WW domain binding protein 1 like [Source:MGI Symbol;Acc:MGI:107577]	-1.68422	0.000136264	0.00223466
Gm10382	lncRNA	predicted gene 10382 [Source:MGI Symbol;Acc:MGI:3647829]	-1.2523	0.00013652	0.00223716
Gm17705	lncRNA	predicted gene, 17705 [Source:MGI Symbol;Acc:MGI:4937339]	-8.51086	0.000136947	0.00224246
Gm11416	processed_pseudogene	predicted gene 11416 [Source:MGI Symbol;Acc:MGI:3652028]	7.01839	0.000137713	0.00225192
Chrnb1	protein_coding	cholinergic receptor nicotinic beta 1 subunit [Source:MGI Symbol;Acc:MGI:87890]	-2.03141	0.000137734	0.00225192
Gm45159	lncRNA	predicted gene 45159 [Source:MGI Symbol;Acc:MGI:5753735]	3.31618	0.000138074	0.00225539
Tanc2	protein_coding	tetratricopeptide repeat, ankyrin repeat and coiled-coil containing 2 [Source:MGI Symbol;Acc:MGI:2444121]	1.87195	0.000138156	0.00225539
Dkkl1	protein_coding	dickkopf-like 1 [Source:MGI Symbol;Acc:MGI:1354963]	2.6428	0.000138973	0.00226702
Gm49266	TEC	predicted gene, 49266 [Source:MGI Symbol;Acc:MGI:6118744]	-4.91919	0.000139138	0.002268
Galm	protein_coding	galactose mutarotase [Source:MGI Symbol;Acc:MGI:2442420]	-9.63881	0.000139513	0.00227239
Zfp248	protein_coding	zinc finger protein 248 [Source:MGI Symbol;Acc:MGI:1919970]	1.7142	0.00014032	0.00228255
Tenm1	protein_coding	teneurin transmembrane protein 1 [Source:MGI Symbol;Acc:MGI:1345185]	2.86599	0.000140349	0.00228255
Gm45345	lncRNA	predicted gene 45345 [Source:MGI Symbol;Acc:MGI:5791181]	2.29939	0.000140463	0.00228268
Gm26918	lncRNA	predicted gene, 26918 [Source:MGI Symbol;Acc:MGI:5504033]	4.05154	0.00014146	0.00229669
Gm31249	lncRNA	predicted gene, 31249 [Source:MGI Symbol;Acc:MGI:5590408]	-7.1903	0.000141538	0.00229669
Gm37529	lncRNA	predicted gene, 37529 [Source:MGI Symbol;Acc:MGI:5610757]	3.16878	0.000142889	0.00231686
Cdkl1	protein_coding	cyclin dependent kinase like 1 [Source:MGI Symbol;Acc:MGI:1918341]	3.53326	0.000143055	0.00231782
Smug1	protein_coding	single-strand selective monofunctional uracil DNA glycosylase [Source:MGI Symbol;Acc:MGI:1918976]	-1.93731	0.00014509	0.00234902
Trim14	protein_coding	tripartite motif-containing 14 [Source:MGI Symbol;Acc:MGI:1921985]	-2.72502	0.000145347	0.00235141
Gap43	protein_coding	growth associated protein 43 [Source:MGI Symbol;Acc:MGI:95639]	2.56639	0.000145654	0.00235461
Slc22a6	protein_coding	solute carrier family 22 (organic anion transporter), member 6 [Source:MGI Symbol;Acc:MGI:892001]	-3.95998	0.000145976	0.00235564
2310030G06Rik	protein_coding	RIKEN cDNA 2310030G06 gene [Source:MGI Symbol;Acc:MGI:1914202]	-3.81632	0.000145997	0.00235564
Dnaaf11	protein_coding	dynein axonemal assembly factor 11 [Source:MGI Symbol;Acc:MGI:1859553]	8.3292	0.000146046	0.00235564
Tsku	protein_coding	tsukushi, small leucine rich proteoglycan [Source:MGI Symbol;Acc:MGI:2443855]	-9.75495	0.000146728	0.00236487
Zfyve28	protein_coding	zinc finger, FYVE domain containing 28 [Source:MGI Symbol;Acc:MGI:2684992]	3.65197	0.00014759	0.002377
Mcf2l	protein_coding	mcf.2 transforming sequence-like [Source:MGI Symbol;Acc:MGI:103263]	1.23233	0.000147711	0.00237716
Eif3l	protein_coding	eukaryotic translation initiation factor 3, subunit L [Source:MGI Symbol;Acc:MGI:2386251]	-1.26895	0.000148084	0.00238139
Wdfy4	protein_coding	WD repeat and FYVE domain containing 4 [Source:MGI Symbol;Acc:MGI:3584510]	-9.00067	0.000148772	0.00238991
Gm45847	lncRNA	predicted gene 45847 [Source:MGI Symbol;Acc:MGI:5804962]	-7.24678	0.000148968	0.00238991
Dot1l	protein_coding	DOT1 like histone lysine methyltransferase [Source:MGI Symbol;Acc:MGI:2143886]	1.54539	0.000149028	0.00238991
Scpep1os	lncRNA	serine carboxypeptidase 1, opposite strand [Source:MGI Symbol;Acc:MGI:1921171]	-3.47382	0.000149057	0.00238991
Chka	protein_coding	choline kinase alpha [Source:MGI Symbol;Acc:MGI:107760]	1.69752	0.000150613	0.00241306
Adamts9	protein_coding	ADAM metallopeptidase with thrombospondin type 1 motif 9 [Source:MGI Symbol;Acc:MGI:1916320]	-3.71511	0.000150912	0.00241605
Rnase4	protein_coding	ribonuclease, RNase A family 4 [Source:MGI Symbol;Acc:MGI:1926217]	-2.03494	0.000151112	0.00241615
Slc16a2	protein_coding	solute carrier family 16 (monocarboxylic acid transporters), member 2 [Source:MGI Symbol;Acc:MGI:1203732]	-1.28192	0.000151225	0.00241615
Gm13463	processed_pseudogene	predicted gene 13463 [Source:MGI Symbol;Acc:MGI:3649844]	3.93041	0.000151255	0.00241615
Aktip	protein_coding	AKT interacting protein [Source:MGI Symbol;Acc:MGI:3693832]	1.4326	0.000151792	0.00242294
Nsg2	protein_coding	neuron specific gene family member 2 [Source:MGI Symbol;Acc:MGI:1202070]	2.29837	0.000152009	0.00242461
Cited1	protein_coding	Cbp/p300-interacting transactivator with Glu/Asp-rich carboxy-terminal domain 1 [Source:MGI Symbol;Acc:MGI:108023]	-10.1881	0.000152173	0.00242543
Gm15412	lncRNA	predicted gene 15412 [Source:MGI Symbol;Acc:MGI:3705100]	5.00923	0.000152287	0.00242545
Mycbp2	protein_coding	MYC binding protein 2, E3 ubiquitin protein ligase [Source:MGI Symbol;Acc:MGI:2179432]	1.27922	0.000152583	0.00242836
Tmem91	protein_coding	transmembrane protein 91 [Source:MGI Symbol;Acc:MGI:2443589]	1.71276	0.000156131	0.002483
Osgep	protein_coding	O-sialoglycoprotein endopeptidase [Source:MGI Symbol;Acc:MGI:1913496]	-0.91263	0.00015719	0.00249621
Caln1	protein_coding	calneuron 1 [Source:MGI Symbol;Acc:MGI:2155987]	2.56449	0.000157193	0.00249621
Sgcz	protein_coding	sarcoglycan zeta [Source:MGI Symbol;Acc:MGI:2388820]	3.58245	0.000157821	0.00250433
Hectd2os	lncRNA	Hectd2, opposite strand [Source:MGI Symbol;Acc:MGI:1919243]	2.7166	0.000158076	0.00250653
Gjb6	protein_coding	gap junction protein, beta 6 [Source:MGI Symbol;Acc:MGI:107588]	-2.84305	0.000158345	0.00250896
2200002D01Rik	protein_coding	RIKEN cDNA 2200002D01 gene [Source:MGI Symbol;Acc:MGI:1919525]	-1.34769	0.000158889	0.00251572
2810001G20Rik	lncRNA	RIKEN cDNA 2810001G20 gene [Source:MGI Symbol;Acc:MGI:1913706]	-2.28272	0.000159033	0.00251615
Npy	protein_coding	neuropeptide Y [Source:MGI Symbol;Acc:MGI:97374]	2.62243	0.000159383	0.00251983
Wdr53	protein_coding	WD repeat domain 53 [Source:MGI Symbol;Acc:MGI:1916230]	-1.8757	0.000159614	0.00252164
2900037B21Rik	TEC	RIKEN cDNA 2900037B21 gene [Source:MGI Symbol;Acc:MGI:1925652]	3.2189	0.00016062	0.00253524
Gm56802	lncRNA	predicted gene, 56802 [Source:MGI Symbol;Acc:MGI:7337517]	2.96161	0.00016071	0.00253524
Med12	protein_coding	mediator complex subunit 12 [Source:MGI Symbol;Acc:MGI:1926212]	-1.6686	0.00016094	0.00253701
Gtdc1	protein_coding	glycosyltransferase-like domain containing 1 [Source:MGI Symbol;Acc:MGI:2444269]	2.12766	0.000161876	0.00254991
Tspan13	protein_coding	tetraspanin 13 [Source:MGI Symbol;Acc:MGI:1913359]	-1.50919	0.000162122	0.00255191
Zgpat	protein_coding	zinc finger, CCCH-type with G patch domain [Source:MGI Symbol;Acc:MGI:2449939]	-1.49272	0.00016259	0.0025574
Gm20412	lncRNA	predicted gene 20412 [Source:MGI Symbol;Acc:MGI:5141877]	-2.12573	0.000163286	0.00256649
Rbbp4	protein_coding	retinoblastoma binding protein 4, chromatin remodeling factor [Source:MGI Symbol;Acc:MGI:1194912]	-0.738616	0.000163478	0.00256763
Gm18113	processed_pseudogene	predicted gene, 18113 [Source:MGI Symbol;Acc:MGI:5010298]	-7.08338	0.000164463	0.00258121
Cyb561d1	protein_coding	cytochrome b-561 domain containing 1 [Source:MGI Symbol;Acc:MGI:1919273]	1.54497	0.000164736	0.00258362
Tacstd2	protein_coding	tumor-associated calcium signal transducer 2 [Source:MGI Symbol;Acc:MGI:1861606]	-8.95434	0.000165427	0.00259257
Fkbp10	protein_coding	FK506 binding protein 10 [Source:MGI Symbol;Acc:MGI:104769]	-2.53947	0.000165859	0.00259691
Rph3a	protein_coding	rabphilin 3A [Source:MGI Symbol;Acc:MGI:102788]	2.51203	0.000166031	0.00259691
Zdhhc14	protein_coding	zinc finger, DHHC domain containing 14 [Source:MGI Symbol;Acc:MGI:2653229]	2.20953	0.000166065	0.00259691
Gm16740	lncRNA	predicted gene, 16740 [Source:MGI Symbol;Acc:MGI:4439664]	1.48441	0.000166221	0.00259745
Ptrh2	protein_coding	peptidyl-tRNA hydrolase 2 [Source:MGI Symbol;Acc:MGI:2444848]	-2.63657	0.000166388	0.00259818
Sptb	protein_coding	spectrin beta, erythrocytic [Source:MGI Symbol;Acc:MGI:98387]	2.40076	0.000168071	0.00262256
Mmp14	protein_coding	matrix metallopeptidase 14 (membrane-inserted) [Source:MGI Symbol;Acc:MGI:101900]	-2.57423	0.000169189	0.00263559
Hhatl	protein_coding	hedgehog acyltransferase-like [Source:MGI Symbol;Acc:MGI:1922020]	-2.90747	0.000169224	0.00263559
Hsd17b2	protein_coding	hydroxysteroid (17-beta) dehydrogenase 2 [Source:MGI Symbol;Acc:MGI:1096386]	-6.99913	0.000169272	0.00263559
Kcnc1	protein_coding	potassium voltage gated channel, Shaw-related subfamily, member 1 [Source:MGI Symbol;Acc:MGI:96667]	3.07575	0.000169593	0.00263772
Elavl3	protein_coding	ELAV like RNA binding protein 3 [Source:MGI Symbol;Acc:MGI:109157]	2.12157	0.000169654	0.00263772
Rtn1	protein_coding	reticulon 1 [Source:MGI Symbol;Acc:MGI:1933947]	1.96708	0.000170084	0.0026425
Ranbp3l	protein_coding	RAN binding protein 3-like [Source:MGI Symbol;Acc:MGI:2444654]	-3.60267	0.000171335	0.00265933
Nrxn1	protein_coding	neurexin I [Source:MGI Symbol;Acc:MGI:1096391]	2.01185	0.000171415	0.00265933
Gm26658	lncRNA	predicted gene, 26658 [Source:MGI Symbol;Acc:MGI:5477152]	2.81313	0.000172498	0.00267422
Gm44797	TEC	predicted gene 44797 [Source:MGI Symbol;Acc:MGI:5753373]	4.67246	0.00017285	0.00267652
Gm35405	processed_pseudogene	predicted gene, 35405 [Source:MGI Symbol;Acc:MGI:5594564]	4.94513	0.000173005	0.00267652
Rps21	protein_coding	ribosomal protein S21 [Source:MGI Symbol;Acc:MGI:1913731]	1.23478	0.000173019	0.00267652
1700019D03Rik	protein_coding	RIKEN cDNA 1700019D03 gene [Source:MGI Symbol;Acc:MGI:1914330]	2.26823	0.000175945	0.00271982
Arl10	protein_coding	ADP-ribosylation factor-like 10 [Source:MGI Symbol;Acc:MGI:1930788]	-2.28091	0.000176232	0.00272203
Gm42741	TEC	predicted gene 42741 [Source:MGI Symbol;Acc:MGI:5662878]	9.19058	0.00017634	0.00272203
Obscn	protein_coding	obscurin, cytoskeletal calmodulin and titin-interacting RhoGEF [Source:MGI Symbol;Acc:MGI:2681862]	-8.12233	0.00017659	0.00272393
Ntm	protein_coding	neurotrimin [Source:MGI Symbol;Acc:MGI:2446259]	1.969	0.000177097	0.00272981
Gm37570	TEC	predicted gene, 37570 [Source:MGI Symbol;Acc:MGI:5610798]	2.28325	0.000177483	0.00273379
A330093E20Rik	lncRNA	RIKEN cDNA A330093E20 gene [Source:MGI Symbol;Acc:MGI:2147325]	2.72541	0.000177981	0.00273952
B230303A05Rik	transcribed_processed_pseudogene	RIKEN cDNA B230303A05 gene [Source:MGI Symbol;Acc:MGI:3646895]	2.89872	0.000179516	0.00276117
Msra	protein_coding	methionine sulfoxide reductase A [Source:MGI Symbol;Acc:MGI:106916]	1.50253	0.000179807	0.00276366
Usp53	protein_coding	ubiquitin specific peptidase 53 [Source:MGI Symbol;Acc:MGI:2139607]	-1.40465	0.000180044	0.00276534
Gm10493	processed_pseudogene	predicted gene 10493 [Source:MGI Symbol;Acc:MGI:3644330]	2.41595	0.000181026	0.00277844
Bcas1	protein_coding	brain enriched myelin associated protein 1 [Source:MGI Symbol;Acc:MGI:1924210]	3.72777	0.000181356	0.00278152
Zfp937	protein_coding	zinc finger protein 937 [Source:MGI Symbol;Acc:MGI:3644476]	-2.71789	0.000182903	0.00280196
Wdsub1	protein_coding	WD repeat, SAM and U-box domain containing 1 [Source:MGI Symbol;Acc:MGI:1919387]	-1.92103	0.000182949	0.00280196
Fhl2	protein_coding	four and a half LIM domains 2 [Source:MGI Symbol;Acc:MGI:1338762]	-2.0659	0.000183456	0.00280735
Gulp1	protein_coding	GULP, engulfment adaptor PTB domain containing 1 [Source:MGI Symbol;Acc:MGI:1920407]	-2.02625	0.000183561	0.00280735
Lin7a	protein_coding	lin-7 homolog A, crumbs cell polarity complex component [Source:MGI Symbol;Acc:MGI:2135609]	2.28308	0.000183736	0.00280804
Slc20a2	protein_coding	solute carrier family 20, member 2 [Source:MGI Symbol;Acc:MGI:97851]	-1.91552	0.000184053	0.00281057
Gm15680	lncRNA	predicted gene 15680 [Source:MGI Symbol;Acc:MGI:3783122]	6.32444	0.000184163	0.00281057
Adcy1	protein_coding	adenylate cyclase 1 [Source:MGI Symbol;Acc:MGI:99677]	1.81028	0.000184364	0.00281165
Stn1	protein_coding	STN1, CST complex subunit [Source:MGI Symbol;Acc:MGI:1915581]	-1.62818	0.000185381	0.00282503
Tm9sf2	protein_coding	transmembrane 9 superfamily member 2 [Source:MGI Symbol;Acc:MGI:1915309]	-1.25784	0.000185504	0.00282503
Spag6l	protein_coding	sperm associated antigen 6-like [Source:MGI Symbol;Acc:MGI:1354388]	5.66325	0.000185682	0.00282575
Ar	protein_coding	androgen receptor [Source:MGI Symbol;Acc:MGI:88064]	2.46041	0.000187139	0.00284592
Gm38039	lncRNA	predicted gene, 38039 [Source:MGI Symbol;Acc:MGI:5611267]	3.26901	0.00018791	0.00285563
Gm10419	lncRNA	predicted gene 10419 [Source:MGI Symbol;Acc:MGI:3642823]	2.3966	0.00018937	0.00287579
Bex2	protein_coding	brain expressed X-linked 2 [Source:MGI Symbol;Acc:MGI:1338017]	2.02248	0.000191795	0.00291056
Plb1	protein_coding	phospholipase B1 [Source:MGI Symbol;Acc:MGI:1922406]	-8.27486	0.000192288	0.00291599
Nyap2	protein_coding	neuronal tyrosine-phophorylated phosphoinositide 3-kinase adaptor 2 [Source:MGI Symbol;Acc:MGI:2443135]	5.5457	0.000192836	0.002921
Rassf7	protein_coding	Ras association (RalGDS/AF-6) domain family (N-terminal) member 7 [Source:MGI Symbol;Acc:MGI:1914235]	-9.48687	0.00019289	0.002921
Lilrb4a	protein_coding	leukocyte immunoglobulin-like receptor, subfamily B, member 4A [Source:MGI Symbol;Acc:MGI:102701]	-8.45697	0.00019334	0.00292575
Hcn1	protein_coding	hyperpolarization activated cyclic nucleotide gated potassium channel 1 [Source:MGI Symbol;Acc:MGI:1096392]	2.65454	0.000193984	0.00293345
Cat	protein_coding	catalase [Source:MGI Symbol;Acc:MGI:88271]	-1.28643	0.000194184	0.0029344
Prox2os	lncRNA	prospero homeobox 2 opposite strand [Source:MGI Symbol;Acc:MGI:5011542]	2.39951	0.000196921	0.00297369
Gm44002	TEC	predicted gene, 44002 [Source:MGI Symbol;Acc:MGI:5690394]	1.83611	0.000198307	0.00299252
Gm17171	lncRNA	predicted gene 17171 [Source:MGI Symbol;Acc:MGI:4937998]	4.64118	0.0001988	0.00299786
Gm56677	lncRNA	predicted gene, 56677 [Source:MGI Symbol;Acc:MGI:7337268]	-7.33773	0.000199932	0.00301283
C130083A15Rik	TEC	RIKEN cDNA C130083A15 gene [Source:MGI Symbol;Acc:MGI:3028079]	-5.18159	0.000201805	0.00303892
Gm37736	TEC	predicted gene, 37736 [Source:MGI Symbol;Acc:MGI:5610964]	-7.56677	0.000202438	0.00304632
Asap3	protein_coding	ArfGAP with SH3 domain, ankyrin repeat and PH domain 3 [Source:MGI Symbol;Acc:MGI:2684986]	-2.41722	0.000202751	0.00304728
Fam117b	protein_coding	family with sequence similarity 117, member B [Source:MGI Symbol;Acc:MGI:1920000]	1.49917	0.000202785	0.00304728
Nnt	protein_coding	nicotinamide nucleotide transhydrogenase [Source:MGI Symbol;Acc:MGI:109279]	-5.39132	0.000203443	0.00305505
Mbp	protein_coding	myelin basic protein [Source:MGI Symbol;Acc:MGI:96925]	3.94562	0.000203948	0.00305925
Plgrkt	protein_coding	plasminogen receptor, C-terminal lysine transmembrane protein [Source:MGI Symbol;Acc:MGI:1915009]	-0.975661	0.000204007	0.00305925
Gm15513	lncRNA	predicted gene 15513 [Source:MGI Symbol;Acc:MGI:3782961]	4.922	0.000204835	0.00306707
Hapln4	protein_coding	hyaluronan and proteoglycan link protein 4 [Source:MGI Symbol;Acc:MGI:2679531]	2.46252	0.000204929	0.00306707
Trabd2b	protein_coding	TraB domain containing 2B [Source:MGI Symbol;Acc:MGI:3650152]	-5.6509	0.000204955	0.00306707
Marf1	protein_coding	meiosis regulator and mRNA stability 1 [Source:MGI Symbol;Acc:MGI:2444505]	0.995204	0.000205746	0.00307677
Ccdc177	protein_coding	coiled-coil domain containing 177 [Source:MGI Symbol;Acc:MGI:2686414]	4.28957	0.000205972	0.00307802
Gm28959	lncRNA	predicted gene 28959 [Source:MGI Symbol;Acc:MGI:5579665]	-1.69299	0.000206334	0.00308128
Endod1	protein_coding	endonuclease domain containing 1 [Source:MGI Symbol;Acc:MGI:1919196]	-1.21257	0.000206723	0.00308495
Gm17205	processed_pseudogene	predicted gene 17205 [Source:MGI Symbol;Acc:MGI:4938032]	8.63684	0.000207433	0.00309176
2210408F21Rik	lncRNA	RIKEN cDNA 2210408F21 gene [Source:MGI Symbol;Acc:MGI:1920902]	1.78017	0.000207466	0.00309176
Cnnm1	protein_coding	cyclin M1 [Source:MGI Symbol;Acc:MGI:1891366]	3.12625	0.000208339	0.00310262
Ctsc	protein_coding	cathepsin C [Source:MGI Symbol;Acc:MGI:109553]	-2.7202	0.000209599	0.00311207
Pars2	protein_coding	prolyl-tRNA synthetase (mitochondrial)(putative) [Source:MGI Symbol;Acc:MGI:2386296]	-4.7933	0.000209611	0.00311207
Cds1	protein_coding	CDP-diacylglycerol synthase 1 [Source:MGI Symbol;Acc:MGI:1921846]	3.03431	0.000209713	0.00311207
Kmo	protein_coding	kynurenine 3-monooxygenase (kynurenine 3-hydroxylase) [Source:MGI Symbol;Acc:MGI:2138151]	-9.00337	0.000209714	0.00311207
Tanc1	protein_coding	tetratricopeptide repeat, ankyrin repeat and coiled-coil containing 1 [Source:MGI Symbol;Acc:MGI:1914110]	-1.44391	0.000209791	0.00311207
Arhgap8	protein_coding	Rho GTPase activating protein 8 [Source:MGI Symbol;Acc:MGI:1920417]	-8.55763	0.00020984	0.00311207
Rin3	protein_coding	Ras and Rab interactor 3 [Source:MGI Symbol;Acc:MGI:2385708]	-2.13944	0.00021058	0.00311907
Gm7854	lncRNA	predicted gene 7854 [Source:MGI Symbol;Acc:MGI:3648234]	-5.19806	0.000210601	0.00311907
Stk32a	protein_coding	serine/threonine kinase 32A [Source:MGI Symbol;Acc:MGI:2442403]	7.98081	0.000211198	0.00312576
Kif21a	protein_coding	kinesin family member 21A [Source:MGI Symbol;Acc:MGI:109188]	2.29038	0.000211764	0.00313067
Gnao1	protein_coding	guanine nucleotide binding protein, alpha O [Source:MGI Symbol;Acc:MGI:95775]	1.59856	0.000211821	0.00313067
Crtap	protein_coding	cartilage associated protein [Source:MGI Symbol;Acc:MGI:1891221]	-1.05156	0.000212023	0.00313125
Sv2c	protein_coding	synaptic vesicle glycoprotein 2c [Source:MGI Symbol;Acc:MGI:1922459]	3.99867	0.00021223	0.00313125
Kcnd2	protein_coding	potassium voltage-gated channel, Shal-related family, member 2 [Source:MGI Symbol;Acc:MGI:102663]	3.10835	0.000212295	0.00313125
Gm2895	lncRNA	predicted gene 2895 [Source:MGI Symbol;Acc:MGI:3781073]	-1.94621	0.000212616	0.00313324
Pak1	protein_coding	p21 (RAC1) activated kinase 1 [Source:MGI Symbol;Acc:MGI:1339975]	1.6543	0.000212721	0.00313324
Flii	protein_coding	flightless I actin binding protein [Source:MGI Symbol;Acc:MGI:1342286]	-0.813353	0.00021317	0.0031377
Gm42801	TEC	predicted gene 42801 [Source:MGI Symbol;Acc:MGI:5662938]	9.11001	0.000214748	0.00315877
Bloc1s2	protein_coding	biogenesis of lysosomal organelles complex-1, subunit 2 [Source:MGI Symbol;Acc:MGI:1920939]	1.02379	0.000215406	0.00316629
Gm4134	unprocessed_pseudogene	predicted gene 4134 [Source:MGI Symbol;Acc:MGI:3782310]	6.40388	0.000215678	0.00316813
Smpd4	protein_coding	sphingomyelin phosphodiesterase 4 [Source:MGI Symbol;Acc:MGI:1924876]	1.83689	0.000216279	0.0031748
Plekhb1	protein_coding	pleckstrin homology domain containing, family B (evectins) member 1 [Source:MGI Symbol;Acc:MGI:1351469]	3.31806	0.000216536	0.0031751
Tmem51	protein_coding	transmembrane protein 51 [Source:MGI Symbol;Acc:MGI:2384874]	-1.52573	0.000216595	0.0031751
Bche	protein_coding	butyrylcholinesterase [Source:MGI Symbol;Acc:MGI:894278]	-4.39823	0.000217078	0.00318002
Cdc42bpg	protein_coding	CDC42 binding protein kinase gamma [Source:MGI Symbol;Acc:MGI:2652845]	-5.46947	0.000217947	0.00319058
Gm43877	TEC	predicted gene, 43877 [Source:MGI Symbol;Acc:MGI:5690269]	8.81868	0.000218553	0.00319728
Anxa5	protein_coding	annexin A5 [Source:MGI Symbol;Acc:MGI:106008]	-1.43482	0.000219947	0.0032147
Slc4a8	protein_coding	solute carrier family 4 (anion exchanger), member 8 [Source:MGI Symbol;Acc:MGI:1928745]	2.45895	0.000220042	0.0032147
Gm26728	lncRNA	predicted gene, 26728 [Source:MGI Symbol;Acc:MGI:5477222]	-2.21408	0.000220285	0.00321607
Ajuba	protein_coding	ajuba LIM protein [Source:MGI Symbol;Acc:MGI:1341886]	-2.30608	0.00022073	0.00322039
Gm47694	TEC	predicted gene, 47694 [Source:MGI Symbol;Acc:MGI:6096803]	6.05584	0.000221436	0.00322747
Sec31b	protein_coding	SEC31 homolog B, COPII coat complex component [Source:MGI Symbol;Acc:MGI:2685187]	-8.76448	0.000221616	0.00322747
Tgm2	protein_coding	transglutaminase 2, C polypeptide [Source:MGI Symbol;Acc:MGI:98731]	-2.0982	0.000221665	0.00322747
Mdga2	protein_coding	MAM domain containing glycosylphosphatidylinositol anchor 2 [Source:MGI Symbol;Acc:MGI:2444706]	1.99537	0.000222676	0.00324
Pdia3	protein_coding	protein disulfide isomerase associated 3 [Source:MGI Symbol;Acc:MGI:95834]	-1.4205	0.000224567	0.00326451
Rasgef1a	protein_coding	RasGEF domain family, member 1A [Source:MGI Symbol;Acc:MGI:1917977]	1.7522	0.000224664	0.00326451
Dynlt1b	protein_coding	dynein light chain Tctex-type 1B [Source:MGI Symbol;Acc:MGI:98643]	-1.24169	0.000225459	0.00327387
Speg	protein_coding	SPEG complex locus [Source:MGI Symbol;Acc:MGI:109282]	1.66745	0.00022597	0.00327908
Gm12096	processed_pseudogene	predicted gene 12096 [Source:MGI Symbol;Acc:MGI:3651583]	8.11895	0.000226434	0.00328239
Grhl2	protein_coding	grainyhead like transcription factor 2 [Source:MGI Symbol;Acc:MGI:2182543]	5.96733	0.000226503	0.00328239
Gm19445	TEC	predicted gene, 19445 [Source:MGI Symbol;Acc:MGI:5011630]	4.88642	0.00022739	0.00329302
Cpa6	protein_coding	carboxypeptidase A6 [Source:MGI Symbol;Acc:MGI:3045348]	5.2614	0.000229587	0.00332261
Dlg4	protein_coding	discs large MAGUK scaffold protein 4 [Source:MGI Symbol;Acc:MGI:1277959]	1.74862	0.000229945	0.00332517
Agap3	protein_coding	ArfGAP with GTPase domain, ankyrin repeat and PH domain 3 [Source:MGI Symbol;Acc:MGI:2183446]	1.354	0.000230084	0.00332517
Cyp46a1	protein_coding	cytochrome P450, family 46, subfamily a, polypeptide 1 [Source:MGI Symbol;Acc:MGI:1341877]	3.05063	0.000230227	0.00332517
Gm16183	lncRNA	predicted gene 16183 [Source:MGI Symbol;Acc:MGI:3802174]	4.03924	0.000231115	0.00333576
Mllt11	protein_coding	myeloid/lymphoid or mixed-lineage leukemia; translocated to, 11 [Source:MGI Symbol;Acc:MGI:1929671]	1.92308	0.000231429	0.00333806
Txnip	protein_coding	thioredoxin interacting protein [Source:MGI Symbol;Acc:MGI:1889549]	-1.56872	0.0002323	0.00334839
Adra1a	protein_coding	adrenergic receptor, alpha 1a [Source:MGI Symbol;Acc:MGI:104773]	-3.23148	0.000232849	0.00335405
Gm24989	snoRNA	predicted gene, 24989 [Source:MGI Symbol;Acc:MGI:5454766]	5.73431	0.000233744	0.0033647
Paics	protein_coding	phosphoribosylaminoimidazole carboxylase, phosphoribosylaminoribosylaminoimidazole, succinocarboxamide synthetase [Source:MGI Symbol;Acc:MGI:1914304]	-1.61351	0.000234261	0.00336989
Mapk8ip2	protein_coding	mitogen-activated protein kinase 8 interacting protein 2 [Source:MGI Symbol;Acc:MGI:1926555]	2.78124	0.000234464	0.00337055
F730043M19Rik	lncRNA	RIKEN cDNA F730043M19 gene [Source:MGI Symbol;Acc:MGI:2443237]	2.00168	0.000234776	0.00337279
Etnk2	protein_coding	ethanolamine kinase 2 [Source:MGI Symbol;Acc:MGI:2443760]	-1.86043	0.00023903	0.00343162
4930592A05Rik	lncRNA	RIKEN cDNA 4930592A05 gene [Source:MGI Symbol;Acc:MGI:1923130]	-2.14889	0.000239659	0.00343835
Dusp26	protein_coding	dual specificity phosphatase 26 [Source:MGI Symbol;Acc:MGI:1914209]	2.48004	0.000240527	0.00344851
Gm36935	TEC	predicted gene, 36935 [Source:MGI Symbol;Acc:MGI:5610163]	5.98716	0.000240796	0.00345008
Mtcl1	protein_coding	microtubule crosslinking factor 1 [Source:MGI Symbol;Acc:MGI:1915867]	1.82045	0.000242998	0.00347931
Gm48225	TEC	predicted gene, 48225 [Source:MGI Symbol;Acc:MGI:6097625]	6.60665	0.000245569	0.00351379
Lzts1	protein_coding	leucine zipper, putative tumor suppressor 1 [Source:MGI Symbol;Acc:MGI:2684762]	1.27395	0.000248346	0.00355117
Wnt6	protein_coding	wingless-type MMTV integration site family, member 6 [Source:MGI Symbol;Acc:MGI:98960]	-8.9146	0.000248764	0.00355479
Pde1c	protein_coding	phosphodiesterase 1C [Source:MGI Symbol;Acc:MGI:108413]	-2.84058	0.000249071	0.00355681
Cnih2	protein_coding	cornichon family AMPA receptor auxiliary protein 2 [Source:MGI Symbol;Acc:MGI:1277225]	2.9922	0.000249981	0.00356745
Gm37011	TEC	predicted gene, 37011 [Source:MGI Symbol;Acc:MGI:5610239]	5.16582	0.000251187	0.00358228
Nampt	protein_coding	nicotinamide phosphoribosyltransferase [Source:MGI Symbol;Acc:MGI:1929865]	-1.07932	0.000252627	0.00360043
Rapgef4	protein_coding	Rap guanine nucleotide exchange factor (GEF) 4 [Source:MGI Symbol;Acc:MGI:1917723]	2.08913	0.000252874	0.00360157
Lmntd2	protein_coding	lamin tail domain containing 2 [Source:MGI Symbol;Acc:MGI:1919250]	-7.53401	0.00025324	0.00360371
Cpne4	protein_coding	copine IV [Source:MGI Symbol;Acc:MGI:1921270]	3.1509	0.000253359	0.00360371
A330023F24Rik	lncRNA	RIKEN cDNA A330023F24 gene [Source:MGI Symbol;Acc:MGI:2443958]	1.56281	0.000254745	0.00362105
Smo	protein_coding	smoothened, frizzled class receptor [Source:MGI Symbol;Acc:MGI:108075]	-2.65284	0.000257611	0.00365937
Rasal1	protein_coding	RAS protein activator like 1 (GAP1 like) [Source:MGI Symbol;Acc:MGI:1330842]	2.25289	0.000258042	0.00366307
Cyp2j9	protein_coding	cytochrome P450, family 2, subfamily j, polypeptide 9 [Source:MGI Symbol;Acc:MGI:1921769]	2.7008	0.000258971	0.00367384
Pnma2	protein_coding	paraneoplastic antigen MA2 [Source:MGI Symbol;Acc:MGI:2444129]	2.26489	0.000259445	0.00367814
Gm56524	lncRNA	predicted gene, 56524 [Source:MGI Symbol;Acc:MGI:7336962]	-7.6025	0.000260297	0.00368779
Gm17552	lncRNA	predicted gene, 17552 [Source:MGI Symbol;Acc:MGI:4937186]	-8.09991	0.000261163	0.00369764
9230116N13Rik	lncRNA	RIKEN cDNA 9230116N13 gene [Source:MGI Symbol;Acc:MGI:2443255]	-8.87085	0.000261724	0.00370315
Trmt2b	protein_coding	TRM2 tRNA methyltransferase 2B [Source:MGI Symbol;Acc:MGI:2442530]	-2.44808	0.000265023	0.00374737
Acy3	protein_coding	aminoacylase 3 [Source:MGI Symbol;Acc:MGI:1918920]	-2.6971	0.000265519	0.00375191
Mrap	protein_coding	melanocortin 2 receptor accessory protein [Source:MGI Symbol;Acc:MGI:1924287]	-9.59886	0.000265993	0.00375616
9830166K06Rik	lncRNA	RIKEN cDNA 9830166K06 gene [Source:MGI Symbol;Acc:MGI:3028064]	9.74364	0.000266973	0.00376752
Ctdsp1	protein_coding	CTD small phosphatase 1 [Source:MGI Symbol;Acc:MGI:2654470]	-1.58767	0.000267351	0.00377038
Nr2f2	protein_coding	nuclear receptor subfamily 2, group F, member 2 [Source:MGI Symbol;Acc:MGI:1352452]	-1.89013	0.000267842	0.00377484
C87436	protein_coding	expressed sequence C87436 [Source:MGI Symbol;Acc:MGI:2141787]	-0.906223	0.000268481	0.00378138
Slc35a1	protein_coding	solute carrier family 35 (CMP-sialic acid transporter), member 1 [Source:MGI Symbol;Acc:MGI:1345622]	-1.7614	0.000268861	0.00378425
Zdhhc12	protein_coding	zinc finger, DHHC domain containing 12 [Source:MGI Symbol;Acc:MGI:1913470]	-2.15871	0.00026911	0.00378517
Nrn1	protein_coding	neuritin 1 [Source:MGI Symbol;Acc:MGI:1915654]	2.43094	0.000269406	0.00378517
Chl1	protein_coding	cell adhesion molecule L1-like [Source:MGI Symbol;Acc:MGI:1098266]	3.06745	0.000269454	0.00378517
Ddah2	protein_coding	DDAH family member 2, ADMA independent [Source:MGI Symbol;Acc:MGI:1859016]	-1.62354	0.000269993	0.00378667
Cyb561	protein_coding	cytochrome b-561 [Source:MGI Symbol;Acc:MGI:103253]	-1.16711	0.000270052	0.00378667
Gm28792	lncRNA	predicted gene 28792 [Source:MGI Symbol;Acc:MGI:5579498]	7.04355	0.000270087	0.00378667
Clec4n	protein_coding	C-type lectin domain family 4, member n [Source:MGI Symbol;Acc:MGI:1861231]	-9.99818	0.000270568	0.00379095
Coro1b	protein_coding	coronin, actin binding protein 1B [Source:MGI Symbol;Acc:MGI:1345963]	-0.909641	0.000271194	0.00379725
Nat8l	protein_coding	N-acetyltransferase 8-like [Source:MGI Symbol;Acc:MGI:2447776]	2.53215	0.000271378	0.00379735
Pex5l	protein_coding	peroxisomal biogenesis factor 5-like [Source:MGI Symbol;Acc:MGI:1916672]	3.15863	0.000271684	0.00379916
Hgsnat	protein_coding	heparan-alpha-glucosaminide N-acetyltransferase [Source:MGI Symbol;Acc:MGI:1196297]	-1.82633	0.00027281	0.00381244
Gm45179	TEC	predicted gene 45179 [Source:MGI Symbol;Acc:MGI:5753755]	3.31602	0.000273647	0.00382166
Nlgn3	protein_coding	neuroligin 3 [Source:MGI Symbol;Acc:MGI:2444609]	3.01966	0.000274389	0.00382539
Rela	protein_coding	v-rel reticuloendotheliosis viral oncogene homolog A (avian) [Source:MGI Symbol;Acc:MGI:103290]	-1.09295	0.000274507	0.00382539
Trpm2	protein_coding	transient receptor potential cation channel, subfamily M, member 2 [Source:MGI Symbol;Acc:MGI:1351901]	3.14628	0.000274583	0.00382539
Gm43113	lncRNA	predicted gene 43113 [Source:MGI Symbol;Acc:MGI:5663250]	6.31849	0.00027479	0.00382539
Dag1	protein_coding	dystroglycan 1 [Source:MGI Symbol;Acc:MGI:101864]	-1.47536	0.000274802	0.00382539
Actr5	protein_coding	ARP5 actin-related protein 5 [Source:MGI Symbol;Acc:MGI:1924748]	2.04609	0.000276169	0.00384194
Gm49685	lncRNA	predicted gene, 49685 [Source:MGI Symbol;Acc:MGI:6215134]	4.33891	0.000277784	0.00386191
Btbd9	protein_coding	BTB domain containing 9 [Source:MGI Symbol;Acc:MGI:1916625]	1.18211	0.000278934	0.00387541
Atrnl1	protein_coding	attractin like 1 [Source:MGI Symbol;Acc:MGI:2147749]	1.41332	0.000281448	0.00390732
Ccdc51	protein_coding	coiled-coil domain containing 51 [Source:MGI Symbol;Acc:MGI:1913908]	-3.14589	0.000281698	0.00390732
Uhrf1	protein_coding	ubiquitin-like, containing PHD and RING finger domains, 1 [Source:MGI Symbol;Acc:MGI:1338889]	-8.19936	0.000281775	0.00390732
Mobp	protein_coding	myelin-associated oligodendrocytic basic protein [Source:MGI Symbol;Acc:MGI:108511]	3.79242	0.000283391	0.00392475
BC004004	protein_coding	cDNA sequence BC004004 [Source:MGI Symbol;Acc:MGI:2136782]	-0.944903	0.000283397	0.00392475
Gm17922	processed_pseudogene	predicted gene, 17922 [Source:MGI Symbol;Acc:MGI:5010107]	2.61187	0.000284537	0.00393802
H13	protein_coding	histocompatibility 13 [Source:MGI Symbol;Acc:MGI:95886]	-1.37354	0.000286	0.00395572
Tmem63a	protein_coding	transmembrane protein 63a [Source:MGI Symbol;Acc:MGI:2384789]	-1.43978	0.000286579	0.00396118
Pip5k1c	protein_coding	phosphatidylinositol-4-phosphate 5-kinase, type 1 gamma [Source:MGI Symbol;Acc:MGI:1298224]	1.33371	0.000287158	0.00396664
Dab2	protein_coding	disabled 2, mitogen-responsive phosphoprotein [Source:MGI Symbol;Acc:MGI:109175]	-2.13734	0.000287418	0.00396732
Nat2	protein_coding	N-acetyltransferase 2 (arylamine N-acetyltransferase) [Source:MGI Symbol;Acc:MGI:109201]	-8.91131	0.000287575	0.00396732
Nova2	protein_coding	NOVA alternative splicing regulator 2 [Source:MGI Symbol;Acc:MGI:104296]	1.5843	0.000288861	0.00398251
Kctd21	protein_coding	potassium channel tetramerisation domain containing 21 [Source:MGI Symbol;Acc:MGI:3643121]	-4.96089	0.000290268	0.00399936
Ryr3	protein_coding	ryanodine receptor 3 [Source:MGI Symbol;Acc:MGI:99684]	3.03088	0.000291944	0.00401987
Gm49267	lncRNA	predicted gene, 49267 [Source:MGI Symbol;Acc:MGI:6118746]	-6.75108	0.000293863	0.00404371
Slc15a3	protein_coding	solute carrier family 15, member 3 [Source:MGI Symbol;Acc:MGI:1929691]	1.86678	0.000295126	0.00405849
Chgb	protein_coding	chromogranin B [Source:MGI Symbol;Acc:MGI:88395]	2.85066	0.000295721	0.00406409
Nefm	protein_coding	neurofilament, medium polypeptide [Source:MGI Symbol;Acc:MGI:97314]	2.59001	0.000298426	0.00409865
Cnih3	protein_coding	cornichon family AMPA receptor auxiliary protein 3 [Source:MGI Symbol;Acc:MGI:1920228]	2.58301	0.000298832	0.00409927
Fam221a	protein_coding	family with sequence similarity 221, member A [Source:MGI Symbol;Acc:MGI:2442161]	-8.23098	0.000299001	0.00409927
Lyz2	protein_coding	lysozyme 2 [Source:MGI Symbol;Acc:MGI:96897]	-2.79817	0.000299042	0.00409927
Plch2	protein_coding	phospholipase C, eta 2 [Source:MGI Symbol;Acc:MGI:2443078]	2.03685	0.000299621	0.0041046
H6pd	protein_coding	hexose-6-phosphate dehydrogenase (glucose 1-dehydrogenase) [Source:MGI Symbol;Acc:MGI:2140356]	-2.02526	0.00030096	0.00412032
Patj	protein_coding	PATJ, crumbs cell polarity complex component [Source:MGI Symbol;Acc:MGI:1277960]	-2.33917	0.000301476	0.00412325
Gm56546	lncRNA	predicted gene, 56546 [Source:MGI Symbol;Acc:MGI:7337006]	-7.35816	0.000301556	0.00412325
Slc2a4	protein_coding	solute carrier family 2 (facilitated glucose transporter), member 4 [Source:MGI Symbol;Acc:MGI:95758]	-4.11781	0.000302718	0.00413651
Ubr3	protein_coding	ubiquitin protein ligase E3 component n-recognin 3 [Source:MGI Symbol;Acc:MGI:1861100]	1.19351	0.000305884	0.00417712
Hdx	protein_coding	highly divergent homeobox [Source:MGI Symbol;Acc:MGI:2685226]	3.43062	0.000306688	0.00418315
Gm26902	lncRNA	predicted gene, 26902 [Source:MGI Symbol;Acc:MGI:5477396]	-3.16331	0.000306713	0.00418315
Zfand6	protein_coding	zinc finger, AN1-type domain 6 [Source:MGI Symbol;Acc:MGI:1929510]	-1.2934	0.000308086	0.00419921
Gm44799	TEC	predicted gene 44799 [Source:MGI Symbol;Acc:MGI:5753375]	3.72064	0.000309027	0.00420937
Hilpda	protein_coding	hypoxia inducible lipid droplet associated [Source:MGI Symbol;Acc:MGI:1916823]	-2.6068	0.000309283	0.0042102
Irf2bpl	protein_coding	interferon regulatory factor 2 binding protein-like [Source:MGI Symbol;Acc:MGI:2442463]	-1.13211	0.000309978	0.004217
Fhod3	protein_coding	formin homology 2 domain containing 3 [Source:MGI Symbol;Acc:MGI:1925847]	3.76343	0.000310487	0.00422125
Ano4	protein_coding	anoctamin 4 [Source:MGI Symbol;Acc:MGI:2443344]	4.67636	0.000310945	0.00422481
Kif5c	protein_coding	kinesin family member 5C [Source:MGI Symbol;Acc:MGI:1098269]	2.88252	0.000311455	0.00422621
Gm32014	lncRNA	predicted gene, 32014 [Source:MGI Symbol;Acc:MGI:5591173]	4.61061	0.000311589	0.00422621
Kcnb1	protein_coding	potassium voltage gated channel, Shab-related subfamily, member 1 [Source:MGI Symbol;Acc:MGI:96666]	1.65965	0.000311636	0.00422621
Abca4	protein_coding	ATP-binding cassette, sub-family A member 4 [Source:MGI Symbol;Acc:MGI:109424]	-3.55207	0.000311986	0.0042283
Sbds	protein_coding	SBDS ribosome maturation factor [Source:MGI Symbol;Acc:MGI:1913961]	-1.11143	0.000312275	0.00422955
Gm13541	processed_pseudogene	predicted gene 13541 [Source:MGI Symbol;Acc:MGI:3651925]	6.15913	0.000315994	0.00427723
Stmn1	protein_coding	stathmin 1 [Source:MGI Symbol;Acc:MGI:96739]	1.29272	0.000317647	0.00429691
Olfml3	protein_coding	olfactomedin-like 3 [Source:MGI Symbol;Acc:MGI:1914877]	-2.40956	0.000318772	0.00430942
Apoe	protein_coding	apolipoprotein E [Source:MGI Symbol;Acc:MGI:88057]	-1.10296	0.00031952	0.00431683
Gm16523	transcribed_processed_pseudogene	predicted gene, 16523 [Source:MGI Symbol;Acc:MGI:4360990]	2.92768	0.000320027	0.00432019
Gm3227	lncRNA	predicted gene 3227 [Source:MGI Symbol;Acc:MGI:3781405]	8.58355	0.00032017	0.00432019
Btf3l4b	protein_coding	basic transcription factor 3 like 4B [Source:MGI Symbol;Acc:MGI:5012260]	-6.4134	0.000321268	0.0043323
E430018J23Rik	protein_coding	RIKEN cDNA E430018J23 gene [Source:MGI Symbol;Acc:MGI:2141981]	-6.6518	0.000323833	0.00436415
Fbxo6	protein_coding	F-box protein 6 [Source:MGI Symbol;Acc:MGI:1354743]	-1.22647	0.000324259	0.00436453
Gm8250	processed_pseudogene	predicted gene 8250 [Source:MGI Symbol;Acc:MGI:3647615]	-7.82733	0.000324266	0.00436453
Dgkb	protein_coding	diacylglycerol kinase, beta [Source:MGI Symbol;Acc:MGI:2442474]	1.43246	0.000325925	0.00438412
Gm42616	TEC	predicted gene 42616 [Source:MGI Symbol;Acc:MGI:5662753]	3.98174	0.000329859	0.00443427
Gm44798	TEC	predicted gene 44798 [Source:MGI Symbol;Acc:MGI:5753374]	5.12819	0.00033128	0.0044506
Gm10602	lncRNA	predicted gene 10602 [Source:MGI Symbol;Acc:MGI:3708759]	-2.81557	0.000331863	0.00445564
Svip	protein_coding	small VCP/p97-interacting protein [Source:MGI Symbol;Acc:MGI:1922994]	2.21136	0.000332649	0.00446342
Taf4	protein_coding	TATA-box binding protein associated factor 4 [Source:MGI Symbol;Acc:MGI:2152346]	1.4819	0.000334377	0.00448382
Med10	protein_coding	mediator complex subunit 10 [Source:MGI Symbol;Acc:MGI:106331]	-1.01598	0.00033494	0.00448857
Mapk3	protein_coding	mitogen-activated protein kinase 3 [Source:MGI Symbol;Acc:MGI:1346859]	-1.27752	0.000335531	0.00449369
Bcl2l12	protein_coding	BCL2 like 12 [Source:MGI Symbol;Acc:MGI:1922986]	-1.59021	0.000336251	0.00450054
Cacng2	protein_coding	calcium channel, voltage-dependent, gamma subunit 2 [Source:MGI Symbol;Acc:MGI:1316660]	2.61264	0.000336555	0.00450182
Celsr3	protein_coding	cadherin, EGF LAG seven-pass G-type receptor 3 [Source:MGI Symbol;Acc:MGI:1858236]	2.48805	0.000337106	0.00450502
Copb1	protein_coding	coatomer protein complex, subunit beta 1 [Source:MGI Symbol;Acc:MGI:1917599]	-1.77211	0.000337213	0.00450502
Slc4a11	protein_coding	solute carrier family 4, sodium bicarbonate transporter-like, member 11 [Source:MGI Symbol;Acc:MGI:2138987]	-8.39177	0.000339416	0.00452928
Trpc3	protein_coding	transient receptor potential cation channel, subfamily C, member 3 [Source:MGI Symbol;Acc:MGI:109526]	2.44687	0.000339449	0.00452928
Eif3g	protein_coding	eukaryotic translation initiation factor 3, subunit G [Source:MGI Symbol;Acc:MGI:1858258]	-0.924548	0.00034062	0.0045421
Gm16001	lncRNA	predicted gene 16001 [Source:MGI Symbol;Acc:MGI:3802119]	-3.93519	0.000341368	0.00454925
Col24a1	protein_coding	collagen, type XXIV, alpha 1 [Source:MGI Symbol;Acc:MGI:1918605]	6.60708	0.000341939	0.00455404
Vmn2r84	protein_coding	vomeronasal 2, receptor 84 [Source:MGI Symbol;Acc:MGI:3643367]	4.86316	0.000342224	0.00455502
Pkia	protein_coding	protein kinase inhibitor, alpha [Source:MGI Symbol;Acc:MGI:104747]	1.45989	0.000342716	0.00455876
Sptbn4	protein_coding	spectrin beta, non-erythrocytic 4 [Source:MGI Symbol;Acc:MGI:1890574]	2.79949	0.000344289	0.00457685
A830036E02Rik	lncRNA	RIKEN cDNA A830036E02 gene [Source:MGI Symbol;Acc:MGI:3686876]	3.12657	0.000345228	0.00458651
Ica1	protein_coding	islet cell autoantigen 1 [Source:MGI Symbol;Acc:MGI:96391]	1.5805	0.000345572	0.00458825
Gm13270	lncRNA	predicted gene 13270 [Source:MGI Symbol;Acc:MGI:3651704]	-8.71485	0.000346311	0.00459524
Gm49001	transcribed_processed_pseudogene	predicted gene, 49001 [Source:MGI Symbol;Acc:MGI:6118353]	7.90809	0.00034661	0.00459637
Tbrg1	protein_coding	transforming growth factor beta regulated gene 1 [Source:MGI Symbol;Acc:MGI:1100877]	-1.47292	0.000347166	0.00460091
Cdh18	protein_coding	cadherin 18 [Source:MGI Symbol;Acc:MGI:1344366]	8.27094	0.000347547	0.00460313
Hectd4	protein_coding	HECT domain E3 ubiquitin protein ligase 4 [Source:MGI Symbol;Acc:MGI:3647820]	1.29602	0.000350102	0.00463412
Aoah	protein_coding	acyloxyacyl hydrolase [Source:MGI Symbol;Acc:MGI:1350928]	-8.69253	0.000350702	0.00463922
Gm17202	lncRNA	predicted gene 17202 [Source:MGI Symbol;Acc:MGI:4938029]	3.68664	0.000351295	0.0046442
Cfap69	protein_coding	cilia and flagella associated protein 69 [Source:MGI Symbol;Acc:MGI:2443778]	2.35648	0.000351638	0.00464589
Gm13856	lncRNA	predicted gene 13856 [Source:MGI Symbol;Acc:MGI:3652199]	-3.08151	0.00035336	0.00466578
Ppm1d	protein_coding	protein phosphatase 1D magnesium-dependent, delta isoform [Source:MGI Symbol;Acc:MGI:1858214]	-2.84428	0.000353827	0.00466909
Kcnj3	protein_coding	potassium inwardly-rectifying channel, subfamily J, member 3 [Source:MGI Symbol;Acc:MGI:104742]	3.37542	0.000355123	0.00468332
4933431K23Rik	lncRNA	RIKEN cDNA 4933431K23 gene [Source:MGI Symbol;Acc:MGI:1921725]	-5.63959	0.000358323	0.00472037
Sgf29	protein_coding	SAGA complex associated factor 29 [Source:MGI Symbol;Acc:MGI:1922815]	-1.28381	0.00035837	0.00472037
Zmiz2	protein_coding	zinc finger, MIZ-type containing 2 [Source:MGI Symbol;Acc:MGI:106374]	1.49077	0.000359133	0.00472507
Lrrk1	protein_coding	leucine-rich repeat kinase 1 [Source:MGI Symbol;Acc:MGI:2142227]	-1.98983	0.00035938	0.00472507
Clxn	protein_coding	calaxin [Source:MGI Symbol;Acc:MGI:1914043]	-5.21838	0.000359385	0.00472507
Rab17	protein_coding	RAB17, member RAS oncogene family [Source:MGI Symbol;Acc:MGI:104640]	-8.80499	0.000361571	0.00475091
Tmem179b	protein_coding	transmembrane protein 179B [Source:MGI Symbol;Acc:MGI:1914956]	-1.50649	0.000361958	0.0047531
Ptpn14	protein_coding	protein tyrosine phosphatase, non-receptor type 14 [Source:MGI Symbol;Acc:MGI:102467]	-2.3112	0.000362691	0.00475983
Pawr	protein_coding	PRKC, apoptosis, WT1, regulator [Source:MGI Symbol;Acc:MGI:2149961]	-9.08273	0.000365664	0.00479592
Ncdn	protein_coding	neurochondrin [Source:MGI Symbol;Acc:MGI:1347351]	1.77119	0.000367408	0.00481586
Arsi	protein_coding	arylsulfatase i [Source:MGI Symbol;Acc:MGI:2670959]	-11.3252	0.000369397	0.00483625
Gm20483	lncRNA	predicted gene 20483 [Source:MGI Symbol;Acc:MGI:5141948]	-6.38082	0.000369469	0.00483625
Erbb2	protein_coding	erb-b2 receptor tyrosine kinase 2 [Source:MGI Symbol;Acc:MGI:95410]	-2.55306	0.000369637	0.00483625
Gm15997	lncRNA	predicted gene 15997 [Source:MGI Symbol;Acc:MGI:3805557]	8.35968	0.000370478	0.00484432
Cd209c	protein_coding	CD209c antigen [Source:MGI Symbol;Acc:MGI:2157945]	-7.33283	0.000371664	0.00485687
Sdhd	protein_coding	succinate dehydrogenase complex, subunit D, integral membrane protein [Source:MGI Symbol;Acc:MGI:1914175]	-1.24588	0.00037607	0.004909
Dennd11	protein_coding	DENN domain containing 11 [Source:MGI Symbol;Acc:MGI:2444256]	1.81415	0.000376108	0.004909
Norad	lncRNA	non-coding RNA activated by DNA damage [Source:MGI Symbol;Acc:MGI:1914767]	1.34766	0.000376898	0.00491607
Gm56716	lncRNA	predicted gene, 56716 [Source:MGI Symbol;Acc:MGI:7337346]	-2.4968	0.000377477	0.00491607
Tespa1	protein_coding	thymocyte expressed, positive selection associated 1 [Source:MGI Symbol;Acc:MGI:1914846]	7.12544	0.000377525	0.00491607
Cct6a	protein_coding	chaperonin containing TCP1 subunit 6A [Source:MGI Symbol;Acc:MGI:107943]	-1.52284	0.000377563	0.00491607
Syne2	protein_coding	spectrin repeat containing, nuclear envelope 2 [Source:MGI Symbol;Acc:MGI:2449316]	-1.36536	0.000379191	0.00493257
Dpf1	protein_coding	double PHD fingers 1 [Source:MGI Symbol;Acc:MGI:1352748]	2.30085	0.000379288	0.00493257
Olfm5	protein_coding	olfactomedin 5 [Source:MGI Symbol;Acc:MGI:2443346]	-9.51379	0.000384298	0.00499471
Gm17753	lncRNA	predicted gene, 17753 [Source:MGI Symbol;Acc:MGI:5009838]	-5.5492	0.000385219	0.00500366
Ccn3	protein_coding	cellular communication network factor 3 [Source:MGI Symbol;Acc:MGI:109185]	-4.17448	0.00038551	0.00500444
B230206I08Rik	TEC	RIKEN cDNA B230206I08 gene [Source:MGI Symbol;Acc:MGI:1926094]	3.40519	0.000386476	0.00501395
Gm49677	TEC	predicted gene, 49677 [Source:MGI Symbol;Acc:MGI:6215124]	3.72575	0.000386956	0.00501716
Igsf8	protein_coding	immunoglobulin superfamily, member 8 [Source:MGI Symbol;Acc:MGI:2154090]	-1.60435	0.000387301	0.00501809
Nktr	protein_coding	natural killer tumor recognition sequence [Source:MGI Symbol;Acc:MGI:97346]	1.24491	0.000387494	0.00501809
Gm47700	TEC	predicted gene, 47700 [Source:MGI Symbol;Acc:MGI:6096813]	6.32288	0.000388035	0.00502208
Tuba1c	protein_coding	tubulin, alpha 1C [Source:MGI Symbol;Acc:MGI:1095409]	-1.47726	0.000388505	0.00502515
Slc5a6	protein_coding	solute carrier family 5 (sodium-dependent vitamin transporter), member 6 [Source:MGI Symbol;Acc:MGI:2660847]	-2.64028	0.000390158	0.00504186
Igf2	protein_coding	insulin-like growth factor 2 [Source:MGI Symbol;Acc:MGI:96434]	-3.13551	0.000390533	0.00504186
Trpm3	protein_coding	transient receptor potential cation channel, subfamily M, member 3 [Source:MGI Symbol;Acc:MGI:2443101]	-2.08837	0.000390895	0.00504186
Ppp1r16b	protein_coding	protein phosphatase 1, regulatory subunit 16B [Source:MGI Symbol;Acc:MGI:2151841]	1.41468	0.000390898	0.00504186
Ctsz	protein_coding	cathepsin Z [Source:MGI Symbol;Acc:MGI:1891190]	-1.17043	0.00039114	0.00504186
Tubb2a	protein_coding	tubulin, beta 2A class IIA [Source:MGI Symbol;Acc:MGI:107861]	1.22698	0.000391201	0.00504186
1700020L13Rik	transcribed_unitary_pseudogene	RIKEN cDNA 1700020L13 gene [Source:MGI Symbol;Acc:MGI:1922879]	-7.97064	0.000394731	0.00508431
Grin1	protein_coding	glutamate receptor, ionotropic, NMDA1 (zeta 1) [Source:MGI Symbol;Acc:MGI:95819]	2.54655	0.000395236	0.00508777
Cacnb4	protein_coding	calcium channel, voltage-dependent, beta 4 subunit [Source:MGI Symbol;Acc:MGI:103301]	2.48923	0.000395997	0.00509453
Ackr1	protein_coding	atypical chemokine receptor 1 (Duffy blood group) [Source:MGI Symbol;Acc:MGI:1097689]	-4.15113	0.00039705	0.00510503
Gm54436	misc_RNA	predicted gene, 54436 [Source:MGI Symbol;Acc:MGI:6845352]	-7.5908	0.000398962	0.00512655
Hic1	protein_coding	hypermethylated in cancer 1 [Source:MGI Symbol;Acc:MGI:1338010]	-2.28898	0.000399956	0.00513626
Gm43625	lncRNA	predicted gene 43625 [Source:MGI Symbol;Acc:MGI:5663762]	-5.24151	0.000400383	0.00513869
Dclk2	protein_coding	doublecortin-like kinase 2 [Source:MGI Symbol;Acc:MGI:1918012]	2.39294	0.000400968	0.00514313
Nenf	protein_coding	neuron derived neurotrophic factor [Source:MGI Symbol;Acc:MGI:1913458]	-1.24	0.000402563	0.00515599
Trip10	protein_coding	thyroid hormone receptor interactor 10 [Source:MGI Symbol;Acc:MGI:2146901]	-1.44277	0.000402646	0.00515599
A230006K03Rik	lncRNA	RIKEN cDNA A230006K03 gene [Source:MGI Symbol;Acc:MGI:3644205]	2.70224	0.000402688	0.00515599
Gm47664	lncRNA	predicted gene, 47664 [Source:MGI Symbol;Acc:MGI:6096754]	3.31732	0.000403861	0.00516793
Gm5464	lncRNA	predicted gene 5464 [Source:MGI Symbol;Acc:MGI:3643060]	6.67274	0.00040505	0.00518007
Gm28221	lncRNA	predicted gene 28221 [Source:MGI Symbol;Acc:MGI:5578927]	3.18422	0.000405873	0.00518752
Gm42550	TEC	predicted gene 42550 [Source:MGI Symbol;Acc:MGI:5662687]	4.85569	0.000406522	0.00519274
Ifitm2	protein_coding	interferon induced transmembrane protein 2 [Source:MGI Symbol;Acc:MGI:1933382]	-1.71746	0.000406781	0.00519296
Syt13	protein_coding	synaptotagmin XIII [Source:MGI Symbol;Acc:MGI:1933945]	3.37757	0.000410823	0.00524146
Chst12	protein_coding	carbohydrate sulfotransferase 12 [Source:MGI Symbol;Acc:MGI:1929064]	-2.30542	0.000413562	0.00527328
Tubb4a	protein_coding	tubulin, beta 4A class IVA [Source:MGI Symbol;Acc:MGI:107848]	2.61066	0.000414716	0.00528486
Pbx4	protein_coding	pre B cell leukemia homeobox 4 [Source:MGI Symbol;Acc:MGI:1931321]	2.91431	0.000417448	0.00531447
Gnpnat1	protein_coding	glucosamine-phosphate N-acetyltransferase 1 [Source:MGI Symbol;Acc:MGI:1858963]	-1.24612	0.000417532	0.00531447
Ston1	protein_coding	stonin 1 [Source:MGI Symbol;Acc:MGI:1924307]	-4.63057	0.000418401	0.00531931
Or5m3b	protein_coding	olfactory receptor family 5 subfamily M member 3B [Source:MGI Symbol;Acc:MGI:3030867]	-8.07108	0.000418406	0.00531931
Gm43843	TEC	predicted gene 43843 [Source:MGI Symbol;Acc:MGI:5663980]	4.57356	0.00041995	0.0053358
Stx11	protein_coding	syntaxin 11 [Source:MGI Symbol;Acc:MGI:1921982]	-7.77639	0.000421024	0.00534629
Dbndd2	protein_coding	dysbindin domain containing 2 [Source:MGI Symbol;Acc:MGI:106562]	2.66131	0.000421719	0.00535196
Myh7b	protein_coding	myosin, heavy chain 7B, cardiac muscle, beta [Source:MGI Symbol;Acc:MGI:3710243]	3.06302	0.00042202	0.00535263
Rpl38	protein_coding	ribosomal protein L38 [Source:MGI Symbol;Acc:MGI:1914921]	1.13387	0.000422708	0.00535795
Ermp1	protein_coding	endoplasmic reticulum metallopeptidase 1 [Source:MGI Symbol;Acc:MGI:106250]	-1.66702	0.000422937	0.00535795
Abcc8	protein_coding	ATP-binding cassette, sub-family C member 8 [Source:MGI Symbol;Acc:MGI:1352629]	4.53632	0.000424155	0.00537022
Fnta	protein_coding	farnesyltransferase, CAAX box, alpha [Source:MGI Symbol;Acc:MGI:104683]	-1.59735	0.000424578	0.00537242
Col20a1	protein_coding	collagen, type XX, alpha 1 [Source:MGI Symbol;Acc:MGI:1920618]	5.76922	0.000424863	0.00537287
Scn1b	protein_coding	sodium channel, voltage-gated, type I, beta [Source:MGI Symbol;Acc:MGI:98247]	1.75965	0.000426187	0.00538358
Prr22	protein_coding	proline rich 22 [Source:MGI Symbol;Acc:MGI:2685392]	-5.71852	0.00042621	0.00538358
Tubb3	protein_coding	tubulin, beta 3 class III [Source:MGI Symbol;Acc:MGI:107813]	2.45591	0.000426883	0.00538893
Oxr1	protein_coding	oxidation resistance 1 [Source:MGI Symbol;Acc:MGI:2179326]	1.29539	0.000427199	0.00538976
Brd9	protein_coding	bromodomain containing 9 [Source:MGI Symbol;Acc:MGI:2145317]	0.869771	0.000428075	0.00539765
Gm49521	lncRNA	predicted gene, 49521 [Source:MGI Symbol;Acc:MGI:6155216]	1.47283	0.000428712	0.00540252
Rnf32	protein_coding	ring finger protein 32 [Source:MGI Symbol;Acc:MGI:1861747]	2.55642	0.000432605	0.00544626
Eaf2	protein_coding	ELL associated factor 2 [Source:MGI Symbol;Acc:MGI:2146616]	-7.78946	0.000432735	0.00544626
Rai2	protein_coding	retinoic acid induced 2 [Source:MGI Symbol;Acc:MGI:1344378]	-4.86359	0.000432941	0.00544626
Gm36569	lncRNA	predicted gene, 36569 [Source:MGI Symbol;Acc:MGI:5595728]	-7.93533	0.000434399	0.00546141
Ctr9	protein_coding	CTR9 homolog, Paf1/RNA polymerase II complex component [Source:MGI Symbol;Acc:MGI:109345]	-1.20756	0.000435515	0.00547226
Cda	protein_coding	cytidine deaminase [Source:MGI Symbol;Acc:MGI:1919519]	-6.47722	0.000435913	0.00547406
Hdac5	protein_coding	histone deacetylase 5 [Source:MGI Symbol;Acc:MGI:1333784]	1.07109	0.000436268	0.00547533
Champ1	protein_coding	chromosome alignment maintaining phosphoprotein 1 [Source:MGI Symbol;Acc:MGI:1196398]	-2.81193	0.000437014	0.00548149
Gm36736	lncRNA	predicted gene, 36736 [Source:MGI Symbol;Acc:MGI:5595895]	8.60736	0.000437553	0.00548507
Gm8129	processed_pseudogene	predicted pseudogene 8129 [Source:MGI Symbol;Acc:MGI:3646863]	1.94982	0.000437894	0.00548615
Gm15594	lncRNA	predicted gene 15594 [Source:MGI Symbol;Acc:MGI:3783041]	3.02577	0.000438919	0.00549579
Stbd1	protein_coding	starch binding domain 1 [Source:MGI Symbol;Acc:MGI:1261768]	-11.2405	0.000441348	0.005523
Fzd1	protein_coding	frizzled class receptor 1 [Source:MGI Symbol;Acc:MGI:1196625]	-6.30459	0.000443656	0.00554626
Slc22a13b	protein_coding	solute carrier family 22 (organic cation transporter), member 13b [Source:MGI Symbol;Acc:MGI:1924762]	6.55374	0.000443722	0.00554626
Zfp868	protein_coding	zinc finger protein 868 [Source:MGI Symbol;Acc:MGI:2142546]	-1.42992	0.000445402	0.00556404
Mc5r	protein_coding	melanocortin 5 receptor [Source:MGI Symbol;Acc:MGI:99420]	-6.0275	0.00044601	0.00556841
Ccdc68	protein_coding	coiled-coil domain containing 68 [Source:MGI Symbol;Acc:MGI:3612676]	-8.2079	0.000446996	0.00557749
Themis2	protein_coding	thymocyte selection associated family member 2 [Source:MGI Symbol;Acc:MGI:2446213]	-8.55558	0.000448729	0.00559586
Jph4	protein_coding	junctophilin 4 [Source:MGI Symbol;Acc:MGI:2443113]	1.89858	0.000451925	0.00563246
Kcnv1	protein_coding	potassium channel, subfamily V, member 1 [Source:MGI Symbol;Acc:MGI:1914748]	3.27194	0.000456369	0.00568457
Gm33228	lncRNA	predicted gene, 33228 [Source:MGI Symbol;Acc:MGI:5592387]	4.42486	0.000458008	0.00570168
Lrwd1	protein_coding	leucine-rich repeats and WD repeat domain containing 1 [Source:MGI Symbol;Acc:MGI:1918985]	-1.28613	0.000458431	0.00570366
Egfem1	protein_coding	EGF-like and EMI domain containing 1 [Source:MGI Symbol;Acc:MGI:1922990]	3.4929	0.000460539	0.00572657
Gm6525	protein_coding	predicted pseudogene 6525 [Source:MGI Symbol;Acc:MGI:3648757]	3.3817	0.000463505	0.00576013
Asns	protein_coding	asparagine synthetase [Source:MGI Symbol;Acc:MGI:1350929]	2.11795	0.000465008	0.00577547
Emp2	protein_coding	epithelial membrane protein 2 [Source:MGI Symbol;Acc:MGI:1098726]	-1.06461	0.000468165	0.00581114
Gm44167	lncRNA	predicted gene, 44167 [Source:MGI Symbol;Acc:MGI:5690559]	4.07878	0.000468418	0.00581114
Cd300ld	protein_coding	CD300 molecule like family member d [Source:MGI Symbol;Acc:MGI:2442358]	-8.95661	0.000469738	0.00582416
A530058N18Rik	lncRNA	RIKEN cDNA A530058N18 gene [Source:MGI Symbol;Acc:MGI:2444858]	5.18807	0.000472565	0.00585402
Prr18	protein_coding	proline rich 18 [Source:MGI Symbol;Acc:MGI:2443403]	2.79345	0.00047269	0.00585402
Nfkbib	protein_coding	nuclear factor of kappa light polypeptide gene enhancer in B cells inhibitor, beta [Source:MGI Symbol;Acc:MGI:104752]	-1.58495	0.000473083	0.00585552
Igfbp6	protein_coding	insulin-like growth factor binding protein 6 [Source:MGI Symbol;Acc:MGI:96441]	-4.21809	0.000473601	0.00585858
Trio	protein_coding	triple functional domain (PTPRF interacting) [Source:MGI Symbol;Acc:MGI:1927230]	1.44587	0.000477624	0.00590495
Gm20172	TEC	predicted gene, 20172 [Source:MGI Symbol;Acc:MGI:5012357]	4.26163	0.000478653	0.00591427
Nucb2	protein_coding	nucleobindin 2 [Source:MGI Symbol;Acc:MGI:1858179]	-1.37385	0.000479604	0.00592263
Isyna1	protein_coding	myo-inositol 1-phosphate synthase A1 [Source:MGI Symbol;Acc:MGI:1919030]	-1.27214	0.000481703	0.00594515
Cd302	protein_coding	CD302 antigen [Source:MGI Symbol;Acc:MGI:1913455]	-1.78745	0.000482147	0.00594722
Gm43230	TEC	predicted gene 43230 [Source:MGI Symbol;Acc:MGI:5663367]	3.77515	0.000482627	0.00594861
Ncs1	protein_coding	neuronal calcium sensor 1 [Source:MGI Symbol;Acc:MGI:109166]	2.41727	0.000483068	0.00594861
Agtrap	protein_coding	angiotensin II, type I receptor-associated protein [Source:MGI Symbol;Acc:MGI:1339977]	-1.90579	0.000483088	0.00594861
Tsen54	protein_coding	tRNA splicing endonuclease subunit 54 [Source:MGI Symbol;Acc:MGI:1923515]	-2.06168	0.000483531	0.00595066
Ptprv	protein_coding	protein tyrosine phosphatase receptor type V [Source:MGI Symbol;Acc:MGI:108027]	6.34232	0.000485454	0.00597092
Golga7b	protein_coding	golgin A7B [Source:MGI Symbol;Acc:MGI:1918396]	2.63411	0.000486526	0.00597921
Gabrb1	protein_coding	gamma-aminobutyric acid type A receptor subunit beta 1 [Source:MGI Symbol;Acc:MGI:95619]	2.30124	0.000486683	0.00597921
Gadd45b	protein_coding	growth arrest and DNA-damage-inducible 45 beta [Source:MGI Symbol;Acc:MGI:107776]	-1.90682	0.000487611	0.00598719
Nicol1	protein_coding	NELL2 interacting cell ontogeny regulator 1 [Source:MGI Symbol;Acc:MGI:2686519]	1.54848	0.000489943	0.00601241
Elmod1	protein_coding	ELMO/CED-12 domain containing 1 [Source:MGI Symbol;Acc:MGI:3583900]	2.58189	0.000494078	0.00605969
Dgkh	protein_coding	diacylglycerol kinase, eta [Source:MGI Symbol;Acc:MGI:2444188]	2.08262	0.000494446	0.00606075
Nfkb2	protein_coding	nuclear factor of kappa light polypeptide gene enhancer in B cells 2, p49/p100 [Source:MGI Symbol;Acc:MGI:1099800]	1.12722	0.000497461	0.00609425
Gm15217	lncRNA	predicted gene 15217 [Source:MGI Symbol;Acc:MGI:3705233]	-7.60749	0.000499597	0.0061141
Tmed1	protein_coding	transmembrane p24 trafficking protein 1 [Source:MGI Symbol;Acc:MGI:106201]	-1.52092	0.000499648	0.0061141
Gm44439	TEC	predicted gene, 44439 [Source:MGI Symbol;Acc:MGI:5690831]	6.32597	0.000500307	0.00611613
	lncRNA	novel transcript	-6.23584	0.000500382	0.00611613
E330011O21Rik	lncRNA	RIKEN cDNA E330011O21 gene [Source:MGI Symbol;Acc:MGI:3759668]	-9.13444	0.000500873	0.00611866
Tapbpl	protein_coding	TAP binding protein-like [Source:MGI Symbol;Acc:MGI:2384853]	-1.38299	0.000502546	0.00613562
A930005H10Rik	lncRNA	RIKEN cDNA A930005H10 gene [Source:MGI Symbol;Acc:MGI:1915411]	1.21191	0.000503667	0.00614583
Erc2	protein_coding	ELKS/RAB6-interacting/CAST family member 2 [Source:MGI Symbol;Acc:MGI:1098749]	2.08868	0.000506368	0.00617529
Slc35d2	protein_coding	solute carrier family 35, member D2 [Source:MGI Symbol;Acc:MGI:1917734]	-2.84116	0.000508375	0.00619363
Plpp1	protein_coding	phospholipid phosphatase 1 [Source:MGI Symbol;Acc:MGI:108412]	-1.349	0.000508448	0.00619363
Stxbp5	protein_coding	syntaxin binding protein 5 (tomosyn) [Source:MGI Symbol;Acc:MGI:1926058]	1.32702	0.00050885	0.00619503
Gm44242	TEC	predicted gene, 44242 [Source:MGI Symbol;Acc:MGI:5690634]	3.06035	0.000510568	0.00620997
Vldlr	protein_coding	very low density lipoprotein receptor [Source:MGI Symbol;Acc:MGI:98935]	2.42862	0.000510653	0.00620997
Mr1	protein_coding	major histocompatibility complex, class I-related [Source:MGI Symbol;Acc:MGI:1195463]	-1.66866	0.000512731	0.00623172
Gm37051	TEC	predicted gene, 37051 [Source:MGI Symbol;Acc:MGI:5610279]	4.68702	0.000513537	0.006238
Bmpr1a	protein_coding	bone morphogenetic protein receptor, type 1A [Source:MGI Symbol;Acc:MGI:1338938]	-2.34102	0.000514773	0.00624949
Gm43662	TEC	predicted gene 43662 [Source:MGI Symbol;Acc:MGI:5663799]	5.50558	0.000515541	0.00625009
Sik2	protein_coding	salt inducible kinase 2 [Source:MGI Symbol;Acc:MGI:2445031]	1.3844	0.000515634	0.00625009
Gm16559	lncRNA	predicted gene 16559 [Source:MGI Symbol;Acc:MGI:4414979]	-4.48346	0.000515692	0.00625009
Atg13	protein_coding	autophagy related 13 [Source:MGI Symbol;Acc:MGI:1196429]	1.17129	0.000517315	0.00626623
Gm45129	TEC	predicted gene 45129 [Source:MGI Symbol;Acc:MGI:5753705]	8.29474	0.000518487	0.0062769
Oxsr1	protein_coding	oxidative-stress responsive 1 [Source:MGI Symbol;Acc:MGI:1917378]	1.61411	0.000519721	0.0062883
Tmem88b	protein_coding	transmembrane protein 88B [Source:MGI Symbol;Acc:MGI:2444329]	4.14653	0.000521181	0.00630243
Nptxr	protein_coding	neuronal pentraxin receptor [Source:MGI Symbol;Acc:MGI:1920590]	2.46411	0.00052258	0.00631581
Ice1	protein_coding	interactor of little elongation complex ELL subunit 1 [Source:MGI Symbol;Acc:MGI:2385865]	1.62595	0.000523986	0.00632924
Sdc2	protein_coding	syndecan 2 [Source:MGI Symbol;Acc:MGI:1349165]	-1.38607	0.000524691	0.00633421
Gxylt2	protein_coding	glucoside xylosyltransferase 2 [Source:MGI Symbol;Acc:MGI:2682940]	-3.37451	0.000527171	0.00635855
Tnfrsf11a	protein_coding	tumor necrosis factor receptor superfamily, member 11a, NFKB activator [Source:MGI Symbol;Acc:MGI:1314891]	-2.80228	0.000527297	0.00635855
Lrrtm1	protein_coding	leucine rich repeat transmembrane neuronal 1 [Source:MGI Symbol;Acc:MGI:2389173]	1.80496	0.000528477	0.00636809
Gm49590	TEC	predicted gene, 49590 [Source:MGI Symbol;Acc:MGI:6214994]	-9.00584	0.00052868	0.00636809
Gm20481	lncRNA	predicted gene 20481 [Source:MGI Symbol;Acc:MGI:5141946]	-2.53495	0.000529024	0.00636868
Cwh43	protein_coding	cell wall biogenesis 43 C-terminal homolog [Source:MGI Symbol;Acc:MGI:2444131]	4.69788	0.000530918	0.00638668
Snrpa	protein_coding	small nuclear ribonucleoprotein polypeptide A [Source:MGI Symbol;Acc:MGI:1855690]	-0.633204	0.000531112	0.00638668
Gm16349	lncRNA	predicted gene 16349 [Source:MGI Symbol;Acc:MGI:3840114]	6.45107	0.000533546	0.00640475
Prx	protein_coding	periaxin [Source:MGI Symbol;Acc:MGI:108176]	-8.81265	0.000533734	0.00640475
Slc39a1	protein_coding	solute carrier family 39 (zinc transporter), member 1 [Source:MGI Symbol;Acc:MGI:1353474]	-1.43791	0.000533747	0.00640475
Plbd2	protein_coding	phospholipase B domain containing 2 [Source:MGI Symbol;Acc:MGI:1919022]	-1.20919	0.00053389	0.00640475
Wdr62	protein_coding	WD repeat domain 62 [Source:MGI Symbol;Acc:MGI:1923696]	-6.17551	0.000534101	0.00640475
Kirrel1	protein_coding	kirre like nephrin family adhesion molecule 1 [Source:MGI Symbol;Acc:MGI:1891396]	-4.5875	0.000536859	0.00643424
Nupr2	protein_coding	nuclear protein transcriptional regulator 2 [Source:MGI Symbol;Acc:MGI:1923099]	-6.68463	0.000537271	0.0064356
Necab3	protein_coding	N-terminal EF-hand calcium binding protein 3 [Source:MGI Symbol;Acc:MGI:1861721]	2.51113	0.00053889	0.00645141
Tmpo	protein_coding	thymopoietin [Source:MGI Symbol;Acc:MGI:106920]	-1.6335	0.00053931	0.00645286
1500004A13Rik	lncRNA	RIKEN cDNA 1500004A13 gene [Source:MGI Symbol;Acc:MGI:2442808]	2.14935	0.000540871	0.00646794
Gm12829	lncRNA	predicted gene 12829 [Source:MGI Symbol;Acc:MGI:3650003]	-9.61102	0.000541791	0.00647509
Ccl27al	protein_coding	C-C motif chemokine ligand 27A like [Source:MGI Symbol;Acc:MGI:3713752]	3.3238	0.00054207	0.00647509
Gm48992	lncRNA	predicted gene, 48992 [Source:MGI Symbol;Acc:MGI:6118339]	9.5252	0.000542682	0.00647881
Ube2nl	processed_pseudogene	ubiquitin-conjugating enzyme E2N-like [Source:MGI Symbol;Acc:MGI:3643295]	6.68667	0.000543204	0.00648145
Wnk2	protein_coding	WNK lysine deficient protein kinase 2 [Source:MGI Symbol;Acc:MGI:1922857]	2.07751	0.00054565	0.00650704
Serpind1	protein_coding	serine (or cysteine) peptidase inhibitor, clade D, member 1 [Source:MGI Symbol;Acc:MGI:96051]	-4.31172	0.000549318	0.00654709
Zfhx4	protein_coding	zinc finger homeodomain 4 [Source:MGI Symbol;Acc:MGI:2137668]	-2.34165	0.000549616	0.00654709
Gm7097	lncRNA	predicted gene 7097 [Source:MGI Symbol;Acc:MGI:3779671]	-2.47722	0.000550238	0.00655087
			2.6163	0.000552188	0.00657045
Casp9	protein_coding	caspase 9 [Source:MGI Symbol;Acc:MGI:1277950]	-1.90831	0.000553833	0.0065864
Gm15573	processed_pseudogene	predicted gene 15573 [Source:MGI Symbol;Acc:MGI:3783021]	4.68467	0.000554546	0.00659124
Gm37877	TEC	predicted gene, 37877 [Source:MGI Symbol;Acc:MGI:5611105]	8.59633	0.000556496	0.00661076
Elf2	protein_coding	E74-like factor 2 [Source:MGI Symbol;Acc:MGI:1916507]	-1.47435	0.000559076	0.00663776
Sgsm1	protein_coding	small G protein signaling modulator 1 [Source:MGI Symbol;Acc:MGI:107320]	2.7362	0.000559921	0.00664413
Yif1a	protein_coding	Yip1 interacting factor homolog A (S. cerevisiae) [Source:MGI Symbol;Acc:MGI:1915340]	-1.53596	0.000568653	0.00674403
Asphd1	protein_coding	aspartate beta-hydroxylase domain containing 1 [Source:MGI Symbol;Acc:MGI:2685014]	2.05395	0.000570455	0.00676168
Wnt5a	protein_coding	wingless-type MMTV integration site family, member 5A [Source:MGI Symbol;Acc:MGI:98958]	-2.76504	0.000573827	0.00679791
Wdr89	protein_coding	WD repeat domain 89 [Source:MGI Symbol;Acc:MGI:1919588]	-4.76543	0.000577571	0.00683707
4732440D04Rik	lncRNA	RIKEN cDNA 4732440D04 gene [Source:MGI Symbol;Acc:MGI:3604103]	-2.48107	0.000577767	0.00683707
Tmem158	protein_coding	transmembrane protein 158 [Source:MGI Symbol;Acc:MGI:1919559]	2.72954	0.000579598	0.00685139
Nfe2l2	protein_coding	nuclear factor, erythroid derived 2, like 2 [Source:MGI Symbol;Acc:MGI:108420]	-2.01625	0.000579613	0.00685139
Ids	protein_coding	iduronate 2-sulfatase [Source:MGI Symbol;Acc:MGI:96417]	1.45237	0.000580284	0.00685556
Msantd4	protein_coding	Myb/SANT-like DNA-binding domain containing 4 with coiled-coils [Source:MGI Symbol;Acc:MGI:1925350]	-1.59395	0.000583324	0.0068877
Lpar1	protein_coding	lysophosphatidic acid receptor 1 [Source:MGI Symbol;Acc:MGI:108429]	-1.21283	0.000585204	0.00690611
Gm11844	lncRNA	predicted gene 11844 [Source:MGI Symbol;Acc:MGI:3651040]	4.27599	0.000586061	0.00691244
Slc16a12	protein_coding	solute carrier family 16 (monocarboxylic acid transporters), member 12 [Source:MGI Symbol;Acc:MGI:2147716]	-2.64542	0.000586495	0.00691377
Mx1	protein_coding	MX dynamin-like GTPase 1 [Source:MGI Symbol;Acc:MGI:97243]	8.13212	0.000586855	0.00691385
Ifitm7	protein_coding	interferon induced transmembrane protein 7 [Source:MGI Symbol;Acc:MGI:1921732]	2.51113	0.000587143	0.00691385
Asic2	protein_coding	acid-sensing ion channel 2 [Source:MGI Symbol;Acc:MGI:1100867]	3.02906	0.000589113	0.00693077
Sec24d	protein_coding	SEC24 homolog D, COPII coat complex component [Source:MGI Symbol;Acc:MGI:1916858]	-1.98253	0.000589223	0.00693077
2310014F06Rik	lncRNA	RIKEN cDNA 2310014F06 gene [Source:MGI Symbol;Acc:MGI:1916875]	-8.3205	0.000589842	0.00693426
Cttn	protein_coding	cortactin [Source:MGI Symbol;Acc:MGI:99695]	-1.15179	0.000591475	0.00694967
Gm5117	processed_pseudogene	predicted gene 5117 [Source:MGI Symbol;Acc:MGI:3648041]	4.45864	0.00059433	0.00697941
St18	protein_coding	suppression of tumorigenicity 18 [Source:MGI Symbol;Acc:MGI:2446700]	5.65716	0.000594721	0.00698009
St6galnac5	protein_coding	ST6 (alpha-N-acetyl-neuraminyl-2,3-beta-galactosyl-1,3)-N-acetylgalactosaminide alpha-2,6-sialyltransferase 5 [Source:MGI Symbol;Acc:MGI:1349471]	2.56679	0.000595036	0.00698009
Rapgef4os2	lncRNA	Rap guanine nucleotide exchange factor (GEF) 4, opposite strand 2 [Source:MGI Symbol;Acc:MGI:2139429]	1.87093	0.000596444	0.00699115
Myo16	protein_coding	myosin XVI [Source:MGI Symbol;Acc:MGI:2685951]	3.12753	0.000596627	0.00699115
Gm16054	lncRNA	predicted gene 16054 [Source:MGI Symbol;Acc:MGI:3801819]	2.39364	0.000597372	0.00699364
Enah	protein_coding	ENAH actin regulator [Source:MGI Symbol;Acc:MGI:108360]	1.53631	0.000597489	0.00699364
Gm43188	TEC	predicted gene 43188 [Source:MGI Symbol;Acc:MGI:5663325]	-9.09842	0.00059922	0.00700701
Spock1	protein_coding	sparc/osteonectin, cwcv and kazal-like domains proteoglycan 1 [Source:MGI Symbol;Acc:MGI:105371]	2.60642	0.0005995	0.00700701
Drc1	protein_coding	dynein regulatory complex subunit 1 [Source:MGI Symbol;Acc:MGI:2685906]	2.41694	0.000599607	0.00700701
Gm42466	TEC	predicted gene 42466 [Source:MGI Symbol;Acc:MGI:5662603]	2.10039	0.000601269	0.00702263
Prdx4	protein_coding	peroxiredoxin 4 [Source:MGI Symbol;Acc:MGI:1859815]	-1.6485	0.000606888	0.00708132
Mlst8	protein_coding	MTOR associated protein, LST8 homolog (S. cerevisiae) [Source:MGI Symbol;Acc:MGI:1929514]	-1.44604	0.000606952	0.00708132
Zswim6	protein_coding	zinc finger SWIM-type containing 6 [Source:MGI Symbol;Acc:MGI:1914513]	1.39564	0.000610085	0.00711402
Cabp1	protein_coding	calcium binding protein 1 [Source:MGI Symbol;Acc:MGI:1352750]	2.23067	0.000613388	0.00714867
E2f2	protein_coding	E2F transcription factor 2 [Source:MGI Symbol;Acc:MGI:1096341]	-9.06636	0.000614996	0.00716354
Gm36962	TEC	predicted gene, 36962 [Source:MGI Symbol;Acc:MGI:5610190]	-3.61766	0.000617981	0.00719442
Rpl37rt	transcribed_processed_pseudogene	ribosomal protein L37, retrotransposed [Source:MGI Symbol;Acc:MGI:3651519]	1.10876	0.000622883	0.00724757
Hipk4	protein_coding	homeodomain interacting protein kinase 4 [Source:MGI Symbol;Acc:MGI:2685008]	1.89011	0.000624548	0.00726302
Kcna1	protein_coding	potassium voltage-gated channel, shaker-related subfamily, member 1 [Source:MGI Symbol;Acc:MGI:96654]	3.81092	0.000625107	0.0072656
Dtd2	protein_coding	D-tyrosyl-tRNA deacylase 2 [Source:MGI Symbol;Acc:MGI:1923485]	-2.36387	0.000628384	0.00729975
Eps15	protein_coding	epidermal growth factor receptor pathway substrate 15 [Source:MGI Symbol;Acc:MGI:104583]	0.849524	0.000630025	0.00731453
Gm50107	lncRNA	predicted gene, 50107 [Source:MGI Symbol;Acc:MGI:6302841]	2.24871	0.000630624	0.00731453
Col9a2	protein_coding	collagen, type IX, alpha 2 [Source:MGI Symbol;Acc:MGI:88466]	-3.93725	0.000630674	0.00731453
Prkcg	protein_coding	protein kinase C, gamma [Source:MGI Symbol;Acc:MGI:97597]	2.15713	0.000633678	0.00734541
Tmem79	protein_coding	transmembrane protein 79 [Source:MGI Symbol;Acc:MGI:1919163]	-4.47201	0.000634731	0.00735366
Fgr	protein_coding	FGR proto-oncogene, Src family tyrosine kinase [Source:MGI Symbol;Acc:MGI:95527]	-9.6027	0.000636256	0.00736112
Il13ra2	protein_coding	interleukin 13 receptor, alpha 2 [Source:MGI Symbol;Acc:MGI:1277954]	-11.3812	0.000636293	0.00736112
Ckm	protein_coding	creatine kinase, muscle [Source:MGI Symbol;Acc:MGI:88413]	7.94079	0.000636399	0.00736112
Flywch1	protein_coding	FLYWCH-type zinc finger 1 [Source:MGI Symbol;Acc:MGI:2442638]	0.889489	0.000637551	0.00737048
Fam180a	protein_coding	family with sequence similarity 180, member A [Source:MGI Symbol;Acc:MGI:3039626]	-4.42037	0.00063938	0.0073876
Hspb3	protein_coding	heat shock protein 3 [Source:MGI Symbol;Acc:MGI:1928479]	6.7173	0.000639717	0.0073876
Gm40645	lncRNA	predicted gene, 40645 [Source:MGI Symbol;Acc:MGI:5623530]	-6.24359	0.000642779	0.00741368
Cnbd2	protein_coding	cyclic nucleotide binding domain containing 2 [Source:MGI Symbol;Acc:MGI:1918123]	-0.740773	0.000643007	0.00741368
Ddx42	protein_coding	DEAD box helicase 42 [Source:MGI Symbol;Acc:MGI:1919297]	-0.847836	0.000643008	0.00741368
Epb41l2	protein_coding	erythrocyte membrane protein band 4.1 like 2 [Source:MGI Symbol;Acc:MGI:103009]	-0.816424	0.000645263	0.0074357
Derl2	protein_coding	Der1-like domain family, member 2 [Source:MGI Symbol;Acc:MGI:2151483]	-1.28051	0.000645694	0.00743669
Gm37880	TEC	predicted gene, 37880 [Source:MGI Symbol;Acc:MGI:5611108]	3.17711	0.000646155	0.00743803
Shcbp1l	protein_coding	Shc SH2-domain binding protein 1-like [Source:MGI Symbol;Acc:MGI:1919086]	6.14721	0.000646584	0.007439
S100a11	protein_coding	S100 calcium binding protein A11 [Source:MGI Symbol;Acc:MGI:1338798]	-1.55805	0.000647074	0.00744067
Gpx2-ps1	processed_pseudogene	glutathione peroxidase 2, pseudogene 1 [Source:MGI Symbol;Acc:MGI:106627]	7.2358	0.000647831	0.00744361
Gm30055	TEC	predicted gene, 30055 [Source:MGI Symbol;Acc:MGI:5589214]	7.78514	0.000648021	0.00744361
Dctn1	protein_coding	dynactin 1 [Source:MGI Symbol;Acc:MGI:107745]	0.861674	0.000649739	0.00745936
Sag	protein_coding	S-antigen, retina and pineal gland (arrestin) [Source:MGI Symbol;Acc:MGI:98227]	4.11581	0.000650658	0.00746594
Cers2	protein_coding	ceramide synthase 2 [Source:MGI Symbol;Acc:MGI:1924143]	-1.42028	0.000651063	0.00746661
Cfhr2	protein_coding	complement factor H-related 2 [Source:MGI Symbol;Acc:MGI:3611575]	-3.04905	0.000657	0.00753069
Fdx1	protein_coding	ferredoxin 1 [Source:MGI Symbol;Acc:MGI:103224]	-1.60291	0.000658124	0.00753902
Nat8f2	protein_coding	N-acetyltransferase 8 (GCN5-related) family member 2 [Source:MGI Symbol;Acc:MGI:2136446]	-6.21922	0.000658512	0.00753902
Gm42617	TEC	predicted gene 42617 [Source:MGI Symbol;Acc:MGI:5662754]	8.27131	0.000658776	0.00753902
Celf4	protein_coding	CUGBP, Elav-like family member 4 [Source:MGI Symbol;Acc:MGI:1932407]	2.4377	0.000664834	0.00760186
Gm15397	lncRNA	predicted gene 15397 [Source:MGI Symbol;Acc:MGI:3705298]	9.14404	0.000664973	0.00760186
Sil1	protein_coding	SIL1 nucleotide exchange factor [Source:MGI Symbol;Acc:MGI:1932040]	-1.26426	0.000666411	0.00761426
Gm44677	TEC	predicted gene 44677 [Source:MGI Symbol;Acc:MGI:5753253]	3.16508	0.000666842	0.00761514
Clptm1	protein_coding	cleft lip and palate associated transmembrane protein 1 [Source:MGI Symbol;Acc:MGI:1927155]	-1.15167	0.000668229	0.00762694
Chga	protein_coding	chromogranin A [Source:MGI Symbol;Acc:MGI:88394]	3.45886	0.000668614	0.00762702
Magi1	protein_coding	membrane associated guanylate kinase, WW and PDZ domain containing 1 [Source:MGI Symbol;Acc:MGI:1203522]	2.20861	0.000668944	0.00762702
Myadm	protein_coding	myeloid-associated differentiation marker [Source:MGI Symbol;Acc:MGI:1355332]	-1.63976	0.000670278	0.00763819
Tunar	protein_coding	Tcl1 upstream neural differentiation associated RNA [Source:MGI Symbol;Acc:MGI:1917202]	8.42873	0.000672753	0.00765877
Bbs10	protein_coding	Bardet-Biedl syndrome 10 [Source:MGI Symbol;Acc:MGI:1919019]	-8.59015	0.000672794	0.00765877
Ecrg4	protein_coding	ECRG4 augurin precursor [Source:MGI Symbol;Acc:MGI:1926146]	-12.3543	0.00067403	0.00766878
Map1b	protein_coding	microtubule-associated protein 1B [Source:MGI Symbol;Acc:MGI:1306778]	1.74004	0.000677822	0.00770786
Stac2	protein_coding	SH3 and cysteine rich domain 2 [Source:MGI Symbol;Acc:MGI:2144518]	2.31118	0.000678217	0.00770828
Plbd1	protein_coding	phospholipase B domain containing 1 [Source:MGI Symbol;Acc:MGI:1914107]	-9.34919	0.000678937	0.00771239
Rplp0	protein_coding	ribosomal protein lateral stalk subunit P0 [Source:MGI Symbol;Acc:MGI:1927636]	-0.811028	0.00068138	0.00773607
Suclg2	protein_coding	succinate-Coenzyme A ligase, GDP-forming, beta subunit [Source:MGI Symbol;Acc:MGI:1306824]	-1.39217	0.000681926	0.00773819
Spcs2	protein_coding	signal peptidase complex subunit 2 homolog (S. cerevisiae) [Source:MGI Symbol;Acc:MGI:1913874]	-0.941296	0.000683114	0.00774759
Gm56974	lncRNA	predicted gene, 56974 [Source:MGI Symbol;Acc:MGI:7337861]	-8.21359	0.00068399	0.00775045
Lmx1b	protein_coding	LIM homeobox transcription factor 1 beta [Source:MGI Symbol;Acc:MGI:1100513]	-8.69001	0.000684086	0.00775045
Cnpy4	protein_coding	canopy FGF signaling regulator 4 [Source:MGI Symbol;Acc:MGI:1913705]	-1.52682	0.000685093	0.00775778
Slc22a21	protein_coding	solute carrier family 22 (organic cation transporter), member 21 [Source:MGI Symbol;Acc:MGI:1929481]	-2.46591	0.000686223	0.0077665
Gm37534	TEC	predicted gene, 37534 [Source:MGI Symbol;Acc:MGI:5610762]	2.40431	0.000687286	0.00777445
Pcca	protein_coding	propionyl-Coenzyme A carboxylase, alpha polypeptide [Source:MGI Symbol;Acc:MGI:97499]	-1.15378	0.000688359	0.00778251
Lsm1	protein_coding	LSM1 homolog, mRNA degradation associated [Source:MGI Symbol;Acc:MGI:1914457]	-1.45896	0.000689266	0.00778867
Gng13	protein_coding	guanine nucleotide binding protein (G protein), gamma 13 [Source:MGI Symbol;Acc:MGI:1925616]	2.90363	0.000689669	0.00778914
Gm44758	TEC	predicted gene 44758 [Source:MGI Symbol;Acc:MGI:5753334]	-3.09457	0.000690552	0.00779503
Gm26964	lncRNA	predicted gene, 26964 [Source:MGI Symbol;Acc:MGI:5504079]	3.13573	0.000690927	0.00779517
Gm13032	lncRNA	predicted gene 13032 [Source:MGI Symbol;Acc:MGI:3702685]	-8.23784	0.000691702	0.00779984
Bend6	protein_coding	BEN domain containing 6 [Source:MGI Symbol;Acc:MGI:2444572]	3.22237	0.00069359	0.00781703
Loxl1	protein_coding	lysyl oxidase-like 1 [Source:MGI Symbol;Acc:MGI:106096]	-3.57468	0.000695672	0.00783641
Cftr	protein_coding	cystic fibrosis transmembrane conductance regulator [Source:MGI Symbol;Acc:MGI:88388]	-8.11608	0.000696652	0.00784335
Capn3	protein_coding	calpain 3 [Source:MGI Symbol;Acc:MGI:107437]	7.22176	0.000698119	0.00785576
Spata9	protein_coding	spermatogenesis associated 9 [Source:MGI Symbol;Acc:MGI:1922821]	6.28302	0.000700628	0.00787987
Efnb3	protein_coding	ephrin B3 [Source:MGI Symbol;Acc:MGI:109196]	-1.394	0.000704753	0.00792213
Slc13a4	protein_coding	solute carrier family 13 (sodium/sulfate symporters), member 4 [Source:MGI Symbol;Acc:MGI:2442367]	-6.20676	0.00070615	0.0079303
Ulk3	protein_coding	unc-51-like kinase 3 [Source:MGI Symbol;Acc:MGI:1918992]	1.21649	0.000706216	0.0079303
Gm26901	lncRNA	predicted gene, 26901 [Source:MGI Symbol;Acc:MGI:5477395]	4.5944	0.000707835	0.00794434
Sult2b1	protein_coding	sulfotransferase family, cytosolic, 2B, member 1 [Source:MGI Symbol;Acc:MGI:1926342]	3.79948	0.000710671	0.00797202
Minar1	protein_coding	membrane integral NOTCH2 associated receptor 1 [Source:MGI Symbol;Acc:MGI:2667167]	7.80746	0.000714375	0.0080094
Ehd3	protein_coding	EH-domain containing 3 [Source:MGI Symbol;Acc:MGI:1928900]	-1.98239	0.000715327	0.00801125
Abca8a	protein_coding	ATP-binding cassette, sub-family A member 8a [Source:MGI Symbol;Acc:MGI:2386846]	-3.03378	0.000715582	0.00801125
Aspa	protein_coding	aspartoacylase [Source:MGI Symbol;Acc:MGI:87914]	-2.66238	0.000715656	0.00801125
Mob3b	protein_coding	MOB kinase activator 3B [Source:MGI Symbol;Acc:MGI:2664539]	-1.61566	0.000716349	0.00801485
Vtn	protein_coding	vitronectin [Source:MGI Symbol;Acc:MGI:98940]	-1.88333	0.000723598	0.00809176
Gm29015	lncRNA	predicted gene 29015 [Source:MGI Symbol;Acc:MGI:5579721]	3.95076	0.000727694	0.00813334
A230087F16Rik	lncRNA	RIKEN cDNA A230087F16 gene [Source:MGI Symbol;Acc:MGI:2444635]	1.19021	0.0007297	0.00815093
Gabbr2	protein_coding	gamma-aminobutyric acid type B receptor subunit 2 [Source:MGI Symbol;Acc:MGI:2386030]	2.83898	0.000730024	0.00815093
Arf4	protein_coding	ADP-ribosylation factor 4 [Source:MGI Symbol;Acc:MGI:99433]	-1.04068	0.000731685	0.00816524
Smim29	protein_coding	small integral membrane protein 29 [Source:MGI Symbol;Acc:MGI:2146839]	1.26618	0.000733051	0.00817625
Mrc2	protein_coding	mannose receptor, C type 2 [Source:MGI Symbol;Acc:MGI:107818]	-2.7978	0.000735124	0.00819513
Fbxl2	protein_coding	F-box and leucine-rich repeat protein 2 [Source:MGI Symbol;Acc:MGI:1919429]	1.5456	0.000736206	0.00820295
Adgrg6	protein_coding	adhesion G protein-coupled receptor G6 [Source:MGI Symbol;Acc:MGI:1916151]	-4.17021	0.000737057	0.00820793
Rpa3	protein_coding	replication protein A3 [Source:MGI Symbol;Acc:MGI:1915490]	-1.18249	0.000737415	0.00820793
Cry2	protein_coding	cryptochrome circadian regulator 2 [Source:MGI Symbol;Acc:MGI:1270859]	1.42798	0.000738838	0.00821688
Nlk	protein_coding	nemo like kinase [Source:MGI Symbol;Acc:MGI:1201387]	1.69756	0.000739864	0.00821688
Armh4	protein_coding	armadillo-like helical domain containing 4 [Source:MGI Symbol;Acc:MGI:1914669]	-2.70675	0.000739905	0.00821688
Ppp2r5b	protein_coding	protein phosphatase 2, regulatory subunit B', beta [Source:MGI Symbol;Acc:MGI:2388480]	1.12512	0.000740078	0.00821688
Mir132	miRNA	microRNA 132 [Source:MGI Symbol;Acc:MGI:2676817]	7.24184	0.000740217	0.00821688
Disp2	protein_coding	dispatched RND transporter family member 2 [Source:MGI Symbol;Acc:MGI:2388733]	3.03487	0.000740507	0.00821688
Etv4	protein_coding	ets variant 4 [Source:MGI Symbol;Acc:MGI:99423]	2.24944	0.000743284	0.00824345
Gm49069	TEC	predicted gene, 49069 [Source:MGI Symbol;Acc:MGI:6118452]	3.15845	0.000743882	0.00824583
Serpini1	protein_coding	serine (or cysteine) peptidase inhibitor, clade I, member 1 [Source:MGI Symbol;Acc:MGI:1194506]	2.31163	0.000746976	0.00827588
Nsf	protein_coding	N-ethylmaleimide sensitive fusion protein [Source:MGI Symbol;Acc:MGI:104560]	1.14859	0.000748015	0.00828313
Arhgap39	protein_coding	Rho GTPase activating protein 39 [Source:MGI Symbol;Acc:MGI:107858]	1.74276	0.000752586	0.00832947
Mpp2	protein_coding	membrane protein, palmitoylated 2 (MAGUK p55 subfamily member 2) [Source:MGI Symbol;Acc:MGI:1858257]	2.37493	0.000754348	0.00834469
Gm37452	TEC	predicted gene, 37452 [Source:MGI Symbol;Acc:MGI:5610680]	1.52382	0.000757763	0.00837816
Pttg1ip	protein_coding	pituitary tumor-transforming 1 interacting protein [Source:MGI Symbol;Acc:MGI:2652132]	-0.884385	0.00076249	0.0084261
Gm6981	processed_pseudogene	predicted pseudogene 6981 [Source:MGI Symbol;Acc:MGI:3646966]	-6.87888	0.00076341	0.00842684
Gm34267	lncRNA	predicted gene, 34267 [Source:MGI Symbol;Acc:MGI:5593426]	7.75476	0.00076344	0.00842684
Ccl8	protein_coding	C-C motif chemokine ligand 8 [Source:MGI Symbol;Acc:MGI:101878]	-7.8516	0.00076373	0.00842684
Clasp2	protein_coding	CLIP associating protein 2 [Source:MGI Symbol;Acc:MGI:1923749]	1.19346	0.000770385	0.00849592
Cdc42ep5	protein_coding	CDC42 effector protein 5 [Source:MGI Symbol;Acc:MGI:1929745]	-1.7886	0.000772115	0.00851064
Atp5mc3	protein_coding	ATP synthase membrane subunit c locus 3 [Source:MGI Symbol;Acc:MGI:2442035]	-1.07098	0.00077423	0.00852877
Tcn2	protein_coding	transcobalamin 2 [Source:MGI Symbol;Acc:MGI:98534]	-1.54823	0.000774623	0.00852877
mt-Rnr1	Mt_rRNA	mitochondrially encoded 12S rRNA [Source:MGI Symbol;Acc:MGI:102493]	1.76403	0.000774947	0.00852877
6330419E04Rik	TEC	RIKEN cDNA 6330419E04 gene [Source:MGI Symbol;Acc:MGI:1918013]	3.55001	0.000776251	0.00853876
Gm42875	lncRNA	predicted gene 42875 [Source:MGI Symbol;Acc:MGI:5663012]	4.18924	0.000777727	0.00855063
Cdr1	lncRNA	cerebellar degeneration related antigen 1 [Source:MGI Symbol;Acc:MGI:88359]	1.9915	0.000778655	0.00855647
Zfp184	protein_coding	zinc finger protein 184 (Kruppel-like) [Source:MGI Symbol;Acc:MGI:1922244]	-8.41236	0.00078002	0.00856512
Cmas	protein_coding	cytidine monophospho-N-acetylneuraminic acid synthetase [Source:MGI Symbol;Acc:MGI:1337124]	1.94183	0.000780237	0.00856512
Rims1	protein_coding	regulating synaptic membrane exocytosis 1 [Source:MGI Symbol;Acc:MGI:2152971]	3.35743	0.000780872	0.00856772
Spo11	protein_coding	SPO11 initiator of meiotic double stranded breaks [Source:MGI Symbol;Acc:MGI:1349669]	-6.09501	0.000782281	0.00857881
Pcyox1l	protein_coding	prenylcysteine oxidase 1 like [Source:MGI Symbol;Acc:MGI:3606062]	1.4504	0.000783056	0.00857931
Pde4d	protein_coding	phosphodiesterase 4D, cAMP specific [Source:MGI Symbol;Acc:MGI:99555]	1.31152	0.000783122	0.00857931
Rftn2	protein_coding	raftlin family member 2 [Source:MGI Symbol;Acc:MGI:1921263]	1.50945	0.000784075	0.00858538
Ncam1	protein_coding	neural cell adhesion molecule 1 [Source:MGI Symbol;Acc:MGI:97281]	1.58362	0.000786913	0.00861208
Gm47766	lncRNA	predicted gene, 47766 [Source:MGI Symbol;Acc:MGI:6096919]	-5.96541	0.000787388	0.0086129
Maged2	protein_coding	MAGE family member D2 [Source:MGI Symbol;Acc:MGI:1933391]	-1.27018	0.000792256	0.00866175
Slc38a5	protein_coding	solute carrier family 38, member 5 [Source:MGI Symbol;Acc:MGI:2148066]	-2.25979	0.000793139	0.00866286
Car11	protein_coding	carbonic anhydrase 11 [Source:MGI Symbol;Acc:MGI:1336193]	1.6649	0.000793161	0.00866286
Gm21992	protein_coding	predicted gene 21992 [Source:MGI Symbol;Acc:MGI:5439461]	2.00119	0.000794138	0.00866785
Tceal8	protein_coding	transcription elongation factor A (SII)-like 8 [Source:MGI Symbol;Acc:MGI:1913934]	-1.40334	0.000794422	0.00866785
Glce	protein_coding	glucuronyl C5-epimerase [Source:MGI Symbol;Acc:MGI:2136405]	-1.6229	0.000794848	0.00866811
Ggcx	protein_coding	gamma-glutamyl carboxylase [Source:MGI Symbol;Acc:MGI:1927655]	-1.00861	0.000796991	0.00868708
Shoc2	protein_coding	Shoc2, leucine rich repeat scaffold protein [Source:MGI Symbol;Acc:MGI:1927197]	-1.38629	0.000803984	0.00875887
Dnajc21	protein_coding	DnaJ heat shock protein family (Hsp40) member C21 [Source:MGI Symbol;Acc:MGI:1925371]	1.51537	0.000804637	0.00876156
Vgf	protein_coding	VGF nerve growth factor inducible [Source:MGI Symbol;Acc:MGI:1343180]	2.5479	0.000805914	0.00877103
4930447C04Rik	protein_coding	RIKEN cDNA 4930447C04 gene [Source:MGI Symbol;Acc:MGI:1923051]	2.9508	0.000807455	0.00878336
Rab11fip3	protein_coding	RAB11 family interacting protein 3 (class II) [Source:MGI Symbol;Acc:MGI:2444431]	1.45483	0.000808185	0.00878687
Lhfpl5	protein_coding	lipoma HMGIC fusion partner-like 5 [Source:MGI Symbol;Acc:MGI:1915382]	2.75158	0.000814124	0.00884698
Hfm1	protein_coding	HFM1, ATP-dependent DNA helicase homolog [Source:MGI Symbol;Acc:MGI:3036246]	-7.29279	0.000814991	0.00884754
Gm15624	lncRNA	predicted gene 15624 [Source:MGI Symbol;Acc:MGI:3783068]	3.81754	0.000814997	0.00884754
Slc26a4	protein_coding	solute carrier family 26, member 4 [Source:MGI Symbol;Acc:MGI:1346029]	6.4633	0.000816938	0.00886414
Gm56721	lncRNA	predicted gene, 56721 [Source:MGI Symbol;Acc:MGI:7337356]	2.69573	0.000817928	0.00887043
Gm36952	TEC	predicted gene, 36952 [Source:MGI Symbol;Acc:MGI:5610180]	3.68764	0.000822545	0.00891601
Clspn	protein_coding	claspin [Source:MGI Symbol;Acc:MGI:2445153]	7.22211	0.000831017	0.00900331
Dpp6	protein_coding	dipeptidylpeptidase 6 [Source:MGI Symbol;Acc:MGI:94921]	2.31452	0.000831898	0.00900832
Gm46123	lncRNA	predicted gene, 46123 [Source:MGI Symbol;Acc:MGI:5825760]	2.38861	0.000832933	0.00901401
Selenos	protein_coding	selenoprotein S [Source:MGI Symbol;Acc:MGI:95994]	-1.47034	0.00083326	0.00901401
Shisa6	protein_coding	shisa family member 6 [Source:MGI Symbol;Acc:MGI:2685725]	7.5107	0.000834167	0.00901665
Ppp2r1b	protein_coding	protein phosphatase 2, regulatory subunit A, beta [Source:MGI Symbol;Acc:MGI:1920949]	-1.51479	0.000834341	0.00901665
Ttc3	protein_coding	tetratricopeptide repeat domain 3 [Source:MGI Symbol;Acc:MGI:1276539]	1.20132	0.000837519	0.00904646
Ndufa11	protein_coding	NADH:ubiquinone oxidoreductase subunit A11 [Source:MGI Symbol;Acc:MGI:1917125]	-0.813308	0.000839179	0.00905986
Gm47022	TEC	predicted gene, 47022 [Source:MGI Symbol;Acc:MGI:6095709]	7.1105	0.000843377	0.00910062
Ndrg1	protein_coding	N-myc downstream regulated gene 1 [Source:MGI Symbol;Acc:MGI:1341799]	-1.2617	0.000844628	0.00910568
[truncated: 1,532 more rows]

## Sheet: Supp.Table2
Supp.Table 2 - List of pericyte DEGs between F PFC and M PFC
external_gene_name	cell_type
Grm7	pericyte
Gprc5c	pericyte
Atp1a2	pericyte
Sgip1	pericyte
Cacna2d1	pericyte
Xist	pericyte
Lamp2	pericyte
Foxd1	pericyte
Tmem86a	pericyte
Nbl1	pericyte
Zic4	pericyte
Tfpi	pericyte
Stard8	pericyte
Ptk7	pericyte
Efemp2	pericyte
Prkar1b	pericyte
Twsg1	pericyte
Adamtsl5	pericyte
Gfra2	pericyte
Rabac1	pericyte
Sult1a1	pericyte
Itm2c	pericyte
Chn1	pericyte
Nxph4	pericyte
Angptl2	pericyte
Arhgdib	pericyte
Gpx8	pericyte
Nupr1	pericyte
Srsf5	pericyte
Fbln1	pericyte
Fgfr1	pericyte
Grtp1	pericyte
Abhd14b	pericyte
C1qtnf2	pericyte
Pgrmc1	pericyte
Itpr1	pericyte
Dnpep	pericyte
Lamp1	pericyte
Bmp4	pericyte
Ddr2	pericyte
Slc6a17	pericyte
Cd63	pericyte
Parp3	pericyte
Fstl1	pericyte
Vstm4	pericyte
Spp1	pericyte
Mxra8	pericyte
Wls	pericyte
Hlf	pericyte
Ndufs8	pericyte
Slc6a20a	pericyte
Itpr2	pericyte
Slc22a8	pericyte
Anpep	pericyte
Map2	pericyte
Dpysl2	pericyte
Arap1	pericyte
Rab34	pericyte
Txndc5	pericyte
Laptm4a	pericyte
Parva	pericyte
Uchl1	pericyte
Plod1	pericyte
Spry2	pericyte
Phldb2	pericyte
Tgfb1i1	pericyte
Fam118b	pericyte
Nub1	pericyte
Tec	pericyte
Gstt1	pericyte
Cd248	pericyte
Tram1	pericyte
Scpep1	pericyte
Ifitm1	pericyte
Tnfrsf1a	pericyte
Gusb	pericyte
Emp3	pericyte
Fkbp10	pericyte
Mmp14	pericyte
Lin7a	pericyte
Tm9sf2	pericyte
Anxa5	pericyte
Ajuba	pericyte
Nr2f2	pericyte
Coro1b	pericyte
Hgsnat	pericyte
Dag1	pericyte
H13	pericyte
H6pd	pericyte
Trpc3	pericyte
Igf2	pericyte
Ctsz	pericyte
Hic1	pericyte
Nenf	pericyte
Ifitm2	pericyte
Emp2	pericyte
Trio	pericyte
Cd302	pericyte
Bmpr1a	pericyte
Sdc2	pericyte
Slc16a12	pericyte
Myadm	pericyte
Ehd3	pericyte
Vtn	pericyte
Mrc2	pericyte
Cry2	pericyte
Serpini1	pericyte
Pde4d	pericyte
Rftn2	pericyte
Maged2	pericyte
Ndst3	pericyte
Ube2e3	pericyte
Cacna1h	pericyte
Sec11a	pericyte
Nedd4	pericyte
Serp1	pericyte
Leprotl1	pericyte
Gns	pericyte
Zbtb20	pericyte
Bcap31	pericyte
Prelp	pericyte
Plce1	pericyte
Serpinh1	pericyte
Mef2c	pericyte
Klhdc2	pericyte
Cd151	pericyte
Col1a2	pericyte
Gprasp1	pericyte
Acsl1	pericyte
Csnk1e	pericyte
Slc6a13	pericyte
Gpsm3	pericyte
Lbh	pericyte
Ndfip1	pericyte
Phc1	pericyte
Pcolce	pericyte
Dcdc2a	pericyte
Rab3a	pericyte
Ror1	pericyte
Slc12a2	pericyte
Slc5a5	pericyte
Capzb	pericyte
Hsp90b1	pericyte
Sebox	pericyte
Bmp5	pericyte
Pnrc1	pericyte
Rorb	pericyte
Farp1	pericyte
Snx18	pericyte
Arhgap29	pericyte
Cap2	pericyte
Tnxb	pericyte
Oat	pericyte
Ifi30	pericyte
Imp3	pericyte
Shc1	pericyte
Zyx	pericyte
Tmem45a	pericyte
Gpc3	pericyte
Tspan31	pericyte
Begain	pericyte
Trip6	pericyte
Perp	pericyte
Itm2b	pericyte
St6gal1	pericyte
Tmod3	pericyte
Dtx4	pericyte
Wsb1	pericyte
Lama2	pericyte
Usp25	pericyte
H3f3b	pericyte
Hspa5	pericyte
R3hdm4	pericyte

## Sheet: Supp.Table3
Supp. Table 3 - Demographic data for human post-mortem tissue
Sex	Age	Post mortem interval (PMI)	Cause of death	Depressive symptoms	History of abuse	Antidepressant treatment
F	85	12	Accident	No	N/A	No
F	29	80	Natural	No	No	No
F	68	43	Natural	No	N/A	No
F	38	43	Natural	No	No	No
F	44	60	Suicide	Yes	N/A	No
F	50	45.9	Suicide	Yes	N/A	No
F	52	71.42	Suicide	Yes	N/A	No
F	46	58.43	Suicide	Yes	N/A	No
F	35	37	Natural	Yes	N/A	Yes
F	55	70.72	Suicide	Yes	N/A	Yes
F	47	53.5	Suicide	Yes	N/A	No
F	54	132.6	Natural	Yes	N/A	Yes
F	57	49	Suicide	Yes	N/A	Yes

## Sheet: Suppl. Table 4
Suppl. Table 4 - DEGs of pericytes exposed to serum (MDD vs CTRL women)
external_gene_name	gene_biotype	description	log2FoldChange	pvalue	padj
DDX39B	protein_coding	DExD-box helicase 39B [Source:HGNC Symbol;Acc:HGNC:13917]	0.644563	4.39533e-53	6.17237e-49
CARMN	lncRNA	cardiac mesoderm enhancer-associated non-coding RNA [Source:HGNC Symbol;Acc:HGNC:42872]	0.756757	2.46359e-32	1.72981e-28
MEG3	lncRNA	maternally expressed 3 [Source:HGNC Symbol;Acc:HGNC:14575]	0.507677	5.53051e-29	1.94162e-25
TTLL3	protein_coding	tubulin tyrosine ligase like 3 [Source:HGNC Symbol;Acc:HGNC:24483]	0.716553	6.44688e-20	1.81067e-16
SLFNL1-AS1	lncRNA	SLFNL1 antisense RNA 1 [Source:HGNC Symbol;Acc:HGNC:44126]	1.13912	7.02019e-15	1.64308e-11
PTPRS	protein_coding	protein tyrosine phosphatase receptor type S [Source:HGNC Symbol;Acc:HGNC:9681]	0.305984	1.3955e-14	2.79957e-11
SLC25A37	protein_coding	solute carrier family 25 member 37 [Source:HGNC Symbol;Acc:HGNC:29786]	0.33273	2.39562e-14	4.20521e-11
GABPB1-AS1	lncRNA	GABPB1 antisense RNA 1 [Source:HGNC Symbol;Acc:HGNC:44157]	0.553628	7.66092e-14	1.19536e-10
FAM229A	protein_coding	family with sequence similarity 229 member A [Source:HGNC Symbol;Acc:HGNC:44652]	1.05833	1.32423e-13	1.85962e-10
MUC20-OT1	lncRNA	MUC20 overlapping transcript [Source:HGNC Symbol;Acc:HGNC:53807]	0.617702	7.25987e-13	9.26822e-10
LRP1	protein_coding	LDL receptor related protein 1 [Source:HGNC Symbol;Acc:HGNC:6692]	0.32203	3.74757e-12	4.3856e-09
CRISPLD2	protein_coding	cysteine rich secretory protein LCCL domain containing 2 [Source:HGNC Symbol;Acc:HGNC:25248]	0.380213	4.86305e-12	5.25322e-09
GSDMB	protein_coding	gasdermin B [Source:HGNC Symbol;Acc:HGNC:23690]	0.638666	7.95125e-12	7.44396e-09
DDX17	protein_coding	DEAD-box helicase 17 [Source:HGNC Symbol;Acc:HGNC:2740]	0.211977	7.70483e-12	7.44396e-09
AFG3L1P	transcribed_unitary_pseudogene	AFG3 like matrix AAA peptidase subunit 1, pseudogene [Source:HGNC Symbol;Acc:HGNC:314]	0.461538	2.59368e-11	2.14253e-08
TXNDC5	protein_coding	thioredoxin domain containing 5 [Source:HGNC Symbol;Acc:HGNC:21073]	-0.643267	2.55336e-11	2.14253e-08
IGF2BP1	protein_coding	insulin like growth factor 2 mRNA binding protein 1 [Source:HGNC Symbol;Acc:HGNC:28866]	0.255041	4.14632e-11	3.23482e-08
POSTN	protein_coding	periostin [Source:HGNC Symbol;Acc:HGNC:16953]	-0.25808	1.0806e-10	7.58741e-08
EGLN1	protein_coding	egl-9 family hypoxia inducible factor 1 [Source:HGNC Symbol;Acc:HGNC:1232]	-0.546535	2.52604e-10	1.6892e-07
CCNL1	protein_coding	cyclin L1 [Source:HGNC Symbol;Acc:HGNC:20569]	-0.260028	3.08927e-10	1.97194e-07
ZFP36L1	protein_coding	ZFP36 ring finger protein like 1 [Source:HGNC Symbol;Acc:HGNC:1107]	0.263273	3.471e-10	2.11927e-07
CCDC14	protein_coding	coiled-coil domain containing 14 [Source:HGNC Symbol;Acc:HGNC:25766]	-0.330857	4.66984e-10	2.73244e-07
NFE2L3	protein_coding	NFE2 like bZIP transcription factor 3 [Source:HGNC Symbol;Acc:HGNC:7783]	-0.349675	5.35665e-10	3.00894e-07
CCDC136	protein_coding	coiled-coil domain containing 136 [Source:HGNC Symbol;Acc:HGNC:22225]	0.634934	6.8273e-10	3.5927e-07
POLR2A	protein_coding	RNA polymerase II subunit A [Source:HGNC Symbol;Acc:HGNC:9187]	0.213636	6.90756e-10	3.5927e-07
SZT2	protein_coding	SZT2 subunit of KICSTOR complex [Source:HGNC Symbol;Acc:HGNC:29040]	0.289775	1.06445e-09	5.15449e-07
MT-ND6	protein_coding	mitochondrially encoded NADH:ubiquinone oxidoreductase core subunit 6 [Source:HGNC Symbol;Acc:HGNC:7462]	-0.463879	1.36172e-09	6.37422e-07
HECTD4	protein_coding	HECT domain E3 ubiquitin protein ligase 4 [Source:HGNC Symbol;Acc:HGNC:26611]	0.338753	1.60153e-09	7.25491e-07
TEAD3	protein_coding	TEA domain transcription factor 3 [Source:HGNC Symbol;Acc:HGNC:11716]	0.280812	1.84226e-09	7.83965e-07
CEP290	protein_coding	centrosomal protein 290 [Source:HGNC Symbol;Acc:HGNC:29021]	-0.400182	1.81298e-09	7.83965e-07
ADAMTS7	protein_coding	ADAM metallopeptidase with thrombospondin type 1 motif 7 [Source:HGNC Symbol;Acc:HGNC:223]	0.282415	2.0261e-09	8.36841e-07
MAPK8IP3	protein_coding	mitogen-activated protein kinase 8 interacting protein 3 [Source:HGNC Symbol;Acc:HGNC:6884]	0.340657	2.551e-09	1.02353e-06
PABPC1L	protein_coding	poly(A) binding protein cytoplasmic 1 like [Source:HGNC Symbol;Acc:HGNC:15797]	0.473775	2.76131e-09	1.07714e-06
TOMM7	protein_coding	translocase of outer mitochondrial membrane 7 [Source:HGNC Symbol;Acc:HGNC:21648]	-0.233271	2.99907e-09	1.13827e-06
BRD4	protein_coding	bromodomain containing 4 [Source:HGNC Symbol;Acc:HGNC:13575]	0.262663	3.16894e-09	1.17109e-06
SAT1	protein_coding	spermidine/spermine N1-acetyltransferase 1 [Source:HGNC Symbol;Acc:HGNC:10540]	-0.31581	3.45131e-09	1.21167e-06
SNHG1	lncRNA	small nucleolar RNA host gene 1 [Source:HGNC Symbol;Acc:HGNC:32688]	-0.362291	3.37955e-09	1.21167e-06
NAV2	protein_coding	neuron navigator 2 [Source:HGNC Symbol;Acc:HGNC:15997]	0.242053	5.08684e-09	1.7423e-06
PLEKHG2	protein_coding	pleckstrin homology and RhoGEF domain containing G2 [Source:HGNC Symbol;Acc:HGNC:29515]	0.232986	5.89612e-09	1.97141e-06
TAF10	protein_coding	TATA-box binding protein associated factor 10 [Source:HGNC Symbol;Acc:HGNC:11543]	-0.662021	8.2777e-09	2.70334e-06
MT-CO1	protein_coding	mitochondrially encoded cytochrome c oxidase I [Source:HGNC Symbol;Acc:HGNC:7419]	-0.233854	9.03495e-09	2.88359e-06
NCKAP5L	protein_coding	NCK associated protein 5 like [Source:HGNC Symbol;Acc:HGNC:29321]	0.25142	1.17874e-08	3.59849e-06
DAPK1	protein_coding	death associated protein kinase 1 [Source:HGNC Symbol;Acc:HGNC:2674]	0.487663	1.52158e-08	4.54628e-06
LDLR	protein_coding	low density lipoprotein receptor [Source:HGNC Symbol;Acc:HGNC:6547]	0.363457	2.21005e-08	6.46579e-06
KSR1	protein_coding	kinase suppressor of ras 1 [Source:HGNC Symbol;Acc:HGNC:6465]	0.228935	2.70669e-08	7.75716e-06
SLC23A2	protein_coding	solute carrier family 23 member 2 [Source:HGNC Symbol;Acc:HGNC:10973]	0.281274	2.88793e-08	8.11104e-06
EGLN2	protein_coding	egl-9 family hypoxia inducible factor 2 [Source:HGNC Symbol;Acc:HGNC:14660]	0.589306	3.41144e-08	9.3935e-06
CLCN6	protein_coding	chloride voltage-gated channel 6 [Source:HGNC Symbol;Acc:HGNC:2024]	0.32402	3.66612e-08	9.90064e-06
ZNF142	protein_coding	zinc finger protein 142 [Source:HGNC Symbol;Acc:HGNC:12927]	0.265843	4.18356e-08	1.10849e-05
RBM33	protein_coding	RNA binding motif protein 33 [Source:HGNC Symbol;Acc:HGNC:27223]	0.275054	4.44838e-08	1.13579e-05
EP300	protein_coding	E1A binding protein p300 [Source:HGNC Symbol;Acc:HGNC:3373]	0.211269	4.42379e-08	1.13579e-05
SRRM2	protein_coding	serine/arginine repetitive matrix 2 [Source:HGNC Symbol;Acc:HGNC:16639]	0.189151	4.8062e-08	1.20524e-05
DNASE1	protein_coding	deoxyribonuclease 1 [Source:HGNC Symbol;Acc:HGNC:2956]	0.325063	6.34831e-08	1.56402e-05
PACS2	protein_coding	phosphofurin acidic cluster sorting protein 2 [Source:HGNC Symbol;Acc:HGNC:23794]	0.226412	8.21213e-08	1.95463e-05
MDGA1	protein_coding	MAM domain containing glycosylphosphatidylinositol anchor 1 [Source:HGNC Symbol;Acc:HGNC:19267]	0.584353	9.25029e-08	2.09519e-05
PITPNM2	protein_coding	phosphatidylinositol transfer protein membrane associated 2 [Source:HGNC Symbol;Acc:HGNC:21044]	0.333362	9.00135e-08	2.09519e-05
AHDC1	protein_coding	AT-hook DNA binding motif containing 1 [Source:HGNC Symbol;Acc:HGNC:25230]	0.283575	9.16787e-08	2.09519e-05
TXNDC17	protein_coding	thioredoxin domain containing 17 [Source:HGNC Symbol;Acc:HGNC:28218]	-0.261157	9.4218e-08	2.10017e-05
SLC25A36	protein_coding	solute carrier family 25 member 36 [Source:HGNC Symbol;Acc:HGNC:25554]	-0.25852	1.09868e-07	2.39731e-05
ZNF213-AS1	lncRNA	ZNF213 antisense RNA 1 (head to head) [Source:HGNC Symbol;Acc:HGNC:50505]	0.458197	1.24332e-07	2.64544e-05
PCGF3-AS1	lncRNA	PCGF3 antisense RNA 1 [Source:HGNC Symbol;Acc:HGNC:56108]	0.557307	1.2786e-07	2.67991e-05
IL18BP	protein_coding	interleukin 18 binding protein [Source:HGNC Symbol;Acc:HGNC:5987]	0.526442	1.33e-07	2.74665e-05
GTF3C2-AS2	lncRNA	GTF3C2 antisense RNA 2 [Source:HGNC Symbol;Acc:HGNC:55699]	0.649717	1.37755e-07	2.80361e-05
HIVEP3	protein_coding	HIVEP zinc finger 3 [Source:HGNC Symbol;Acc:HGNC:13561]	0.283312	1.49502e-07	2.99923e-05
DNHD1	protein_coding	dynein heavy chain domain 1 [Source:HGNC Symbol;Acc:HGNC:26532]	0.669582	1.552e-07	3.03792e-05
ATXN2	protein_coding	ataxin 2 [Source:HGNC Symbol;Acc:HGNC:10555]	0.197445	1.55758e-07	3.03792e-05
PSMA3-AS1	lncRNA	PSMA3 antisense RNA 1 [Source:HGNC Symbol;Acc:HGNC:26445]	0.323024	1.61102e-07	3.09912e-05
CRTC1	protein_coding	CREB regulated transcription coactivator 1 [Source:HGNC Symbol;Acc:HGNC:16062]	0.319729	1.69753e-07	3.22142e-05
FMNL3	protein_coding	formin like 3 [Source:HGNC Symbol;Acc:HGNC:23698]	0.183124	1.72778e-07	3.23509e-05
TUBGCP6	protein_coding	tubulin gamma complex associated protein 6 [Source:HGNC Symbol;Acc:HGNC:18127]	0.29505	1.89675e-07	3.50474e-05
CEACAM19	protein_coding	CEA cell adhesion molecule 19 [Source:HGNC Symbol;Acc:HGNC:31951]	0.49239	2.03501e-07	3.7065e-05
GXYLT1	protein_coding	glucoside xylosyltransferase 1 [Source:HGNC Symbol;Acc:HGNC:27482]	-0.230007	2.05873e-07	3.7065e-05
MRPS25	protein_coding	mitochondrial ribosomal protein S25 [Source:HGNC Symbol;Acc:HGNC:14511]	0.335488	2.22006e-07	3.94637e-05
MRPS5	protein_coding	mitochondrial ribosomal protein S5 [Source:HGNC Symbol;Acc:HGNC:14498]	0.414485	2.3703e-07	4.10939e-05
PLEKHM3	protein_coding	pleckstrin homology domain containing M3 [Source:HGNC Symbol;Acc:HGNC:34006]	0.257116	2.36242e-07	4.10939e-05
SH3BP2	protein_coding	SH3 domain binding protein 2 [Source:HGNC Symbol;Acc:HGNC:10825]	0.238237	2.53798e-07	4.34645e-05
SLC6A9	protein_coding	solute carrier family 6 member 9 [Source:HGNC Symbol;Acc:HGNC:11056]	0.428743	2.65949e-07	4.3938e-05
ITGA11	protein_coding	integrin subunit alpha 11 [Source:HGNC Symbol;Acc:HGNC:6136]	0.293161	2.64452e-07	4.3938e-05
SSH1	protein_coding	slingshot protein phosphatase 1 [Source:HGNC Symbol;Acc:HGNC:30579]	0.200216	2.65897e-07	4.3938e-05
CNOT3	protein_coding	CCR4-NOT transcription complex subunit 3 [Source:HGNC Symbol;Acc:HGNC:7879]	0.225618	2.81472e-07	4.54334e-05
RRP36	protein_coding	ribosomal RNA processing 36 [Source:HGNC Symbol;Acc:HGNC:21374]	-0.223203	2.81198e-07	4.54334e-05
TNS3	protein_coding	tensin 3 [Source:HGNC Symbol;Acc:HGNC:21616]	0.221999	2.95294e-07	4.71229e-05
RREB1	protein_coding	ras responsive element binding protein 1 [Source:HGNC Symbol;Acc:HGNC:10449]	0.255481	3.49093e-07	5.44823e-05
MTCO1P12	unprocessed_pseudogene	MT-CO1 pseudogene 12 [Source:HGNC Symbol;Acc:HGNC:52014]	-0.361883	3.49171e-07	5.44823e-05
CPZ	protein_coding	carboxypeptidase Z [Source:HGNC Symbol;Acc:HGNC:2333]	0.730951	3.68169e-07	5.68154e-05
ZFHX3	protein_coding	zinc finger homeobox 3 [Source:HGNC Symbol;Acc:HGNC:777]	0.276383	3.8768e-07	5.9176e-05
ACIN1	protein_coding	apoptotic chromatin condensation inducer 1 [Source:HGNC Symbol;Acc:HGNC:17066]	0.188462	3.92293e-07	5.92363e-05
P4HA1	protein_coding	prolyl 4-hydroxylase subunit alpha 1 [Source:HGNC Symbol;Acc:HGNC:8546]	-0.235401	4.15369e-07	6.14002e-05
TOM1L2	protein_coding	target of myb1 like 2 membrane trafficking protein [Source:HGNC Symbol;Acc:HGNC:11984]	0.217096	4.23975e-07	6.20196e-05
WDR75	protein_coding	WD repeat domain 75 [Source:HGNC Symbol;Acc:HGNC:25725]	-0.222976	4.44174e-07	6.43045e-05
POLR3G	protein_coding	RNA polymerase III subunit G [Source:HGNC Symbol;Acc:HGNC:30075]	-0.404081	5.62188e-07	8.05592e-05
RAD23A	protein_coding	RAD23 homolog A, nucleotide excision repair protein [Source:HGNC Symbol;Acc:HGNC:9812]	0.188295	5.79542e-07	8.22072e-05
SUGP2	protein_coding	SURP and G-patch domain containing 2 [Source:HGNC Symbol;Acc:HGNC:18641]	0.212269	6.00872e-07	8.43804e-05
NCOA6	protein_coding	nuclear receptor coactivator 6 [Source:HGNC Symbol;Acc:HGNC:15936]	0.236957	6.49279e-07	9.02755e-05
ZNF8	protein_coding	zinc finger protein 8 [Source:HGNC Symbol;Acc:HGNC:13154]	0.387987	7.51219e-07	0.000103425
ENTREP3	protein_coding	endosomal transmembrane epsin interactor 3 [Source:HGNC Symbol;Acc:HGNC:1233]	0.289291	8.3972e-07	0.000114487
MICAL3	protein_coding	microtubule associated monooxygenase, calponin and LIM domain containing 3 [Source:HGNC Symbol;Acc:HGNC:24694]	0.231416	9.48131e-07	0.000128025
MZF1	protein_coding	myeloid zinc finger 1 [Source:HGNC Symbol;Acc:HGNC:13108]	0.363698	9.68991e-07	0.000129596
CCDC57	protein_coding	coiled-coil domain containing 57 [Source:HGNC Symbol;Acc:HGNC:27564]	0.329179	9.86712e-07	0.000130721
CACNA2D1	protein_coding	calcium voltage-gated channel auxiliary subunit alpha2delta 1 [Source:HGNC Symbol;Acc:HGNC:1399]	-0.19757	1.0301e-06	0.000135194
SPEG	protein_coding	striated muscle enriched protein kinase [Source:HGNC Symbol;Acc:HGNC:16901]	0.362261	1.1377e-06	0.000147933
TGFB1	protein_coding	transforming growth factor beta 1 [Source:HGNC Symbol;Acc:HGNC:11766]	0.267754	1.20456e-06	0.00015519
MEX3D	protein_coding	mex-3 RNA binding family member D [Source:HGNC Symbol;Acc:HGNC:16734]	-0.26859	1.24089e-06	0.000158417
SYNGAP1	protein_coding	synaptic Ras GTPase activating protein 1 [Source:HGNC Symbol;Acc:HGNC:11497]	0.251967	1.27312e-06	0.000161067
LENG8	protein_coding	leukocyte receptor cluster member 8 [Source:HGNC Symbol;Acc:HGNC:15500]	0.2648	1.3239e-06	0.000165995
CRTC3	protein_coding	CREB regulated transcription coactivator 3 [Source:HGNC Symbol;Acc:HGNC:26148]	0.216511	1.3543e-06	0.000168305
PRR14	protein_coding	proline rich 14 [Source:HGNC Symbol;Acc:HGNC:28458]	0.252827	1.39062e-06	0.000171302
ZDHHC8	protein_coding	zinc finger DHHC-type palmitoyltransferase 8 [Source:HGNC Symbol;Acc:HGNC:18474]	0.198896	1.46053e-06	0.00017835
NPC1	protein_coding	NPC intracellular cholesterol transporter 1 [Source:HGNC Symbol;Acc:HGNC:7897]	0.296591	1.53629e-06	0.000185983
HSPG2	protein_coding	heparan sulfate proteoglycan 2 [Source:HGNC Symbol;Acc:HGNC:5273]	0.25008	1.56141e-06	0.000187391
BCL9L	protein_coding	BCL9 like [Source:HGNC Symbol;Acc:HGNC:23688]	0.203918	1.57461e-06	0.000187391
PLAUR	protein_coding	plasminogen activator, urokinase receptor [Source:HGNC Symbol;Acc:HGNC:9053]	-0.206892	1.70645e-06	0.000201375
SETD1B	protein_coding	SET domain containing 1B, histone lysine methyltransferase [Source:HGNC Symbol;Acc:HGNC:29187]	0.265199	1.74849e-06	0.000204617
ZBTB40	protein_coding	zinc finger and BTB domain containing 40 [Source:HGNC Symbol;Acc:HGNC:29045]	0.225112	1.8194e-06	0.000211155
PTPN23	protein_coding	protein tyrosine phosphatase non-receptor type 23 [Source:HGNC Symbol;Acc:HGNC:14406]	0.196162	1.83872e-06	0.000211648
MAST2	protein_coding	microtubule associated serine/threonine kinase 2 [Source:HGNC Symbol;Acc:HGNC:19035]	0.214269	2.05961e-06	0.000235147
FADS1	protein_coding	fatty acid desaturase 1 [Source:HGNC Symbol;Acc:HGNC:3574]	0.240392	2.0899e-06	0.000236681
SCAMP4	protein_coding	secretory carrier membrane protein 4 [Source:HGNC Symbol;Acc:HGNC:30385]	0.209762	2.14697e-06	0.0002412
SCUBE3	protein_coding	signal peptide, CUB domain and EGF like domain containing 3 [Source:HGNC Symbol;Acc:HGNC:13655]	0.264971	2.21832e-06	0.00024529
RAPGEF1	protein_coding	Rap guanine nucleotide exchange factor 1 [Source:HGNC Symbol;Acc:HGNC:4568]	0.213613	2.20091e-06	0.00024529
CREBBP	protein_coding	CREB binding protein [Source:HGNC Symbol;Acc:HGNC:2348]	0.197851	2.30837e-06	0.000253253
BRD3	protein_coding	bromodomain containing 3 [Source:HGNC Symbol;Acc:HGNC:1104]	0.193304	2.33924e-06	0.000254651
ERVK13-1	lncRNA	endogenous retrovirus group K13 member 1 [Source:HGNC Symbol;Acc:HGNC:27548]	0.393002	2.44539e-06	0.000262993
PRRC2B	protein_coding	proline rich coiled-coil 2B [Source:HGNC Symbol;Acc:HGNC:28121]	0.180785	2.49361e-06	0.000265286
AKAP9	protein_coding	A-kinase anchoring protein 9 [Source:HGNC Symbol;Acc:HGNC:379]	-0.286456	2.54251e-06	0.000268454
LRRK1	protein_coding	leucine rich repeat kinase 1 [Source:HGNC Symbol;Acc:HGNC:18608]	0.275209	2.70946e-06	0.000283948
ANGPTL2	protein_coding	angiopoietin like 2 [Source:HGNC Symbol;Acc:HGNC:490]	0.273658	3.05e-06	0.000317268
EIF2S2	protein_coding	eukaryotic translation initiation factor 2 subunit beta [Source:HGNC Symbol;Acc:HGNC:3266]	-0.177766	3.08959e-06	0.000319023
PNPLA3	protein_coding	patatin like phospholipase domain containing 3 [Source:HGNC Symbol;Acc:HGNC:18590]	0.468998	3.22721e-06	0.00032773
SREBF2	protein_coding	sterol regulatory element binding transcription factor 2 [Source:HGNC Symbol;Acc:HGNC:11290]	0.214534	3.24392e-06	0.00032773
SRSF9	protein_coding	serine and arginine rich splicing factor 9 [Source:HGNC Symbol;Acc:HGNC:10791]	-0.15919	3.24291e-06	0.00032773
SLC16A2	protein_coding	solute carrier family 16 member 2 [Source:HGNC Symbol;Acc:HGNC:10923]	0.253756	3.30728e-06	0.000328736
SMG9	protein_coding	SMG9 nonsense mediated mRNA decay factor [Source:HGNC Symbol;Acc:HGNC:25763]	0.221138	3.39434e-06	0.000328736
HCFC1	protein_coding	host cell factor C1 [Source:HGNC Symbol;Acc:HGNC:4839]	0.189842	3.39173e-06	0.000328736
SEC16A	protein_coding	SEC16 homolog A, endoplasmic reticulum export factor [Source:HGNC Symbol;Acc:HGNC:29006]	0.17409	3.31194e-06	0.000328736
RPL34	protein_coding	ribosomal protein L34 [Source:HGNC Symbol;Acc:HGNC:10340]	-0.161129	3.34975e-06	0.000328736
SRXN1	protein_coding	sulfiredoxin 1 [Source:HGNC Symbol;Acc:HGNC:16132]	-0.73174	3.35965e-06	0.000328736
ADCY9	protein_coding	adenylate cyclase 9 [Source:HGNC Symbol;Acc:HGNC:240]	0.317497	3.72347e-06	0.000358142
VAMP1	protein_coding	vesicle associated membrane protein 1 [Source:HGNC Symbol;Acc:HGNC:12642]	0.354186	3.83105e-06	0.000363509
DHCR7	protein_coding	7-dehydrocholesterol reductase [Source:HGNC Symbol;Acc:HGNC:2860]	0.261484	3.81048e-06	0.000363509
PDCD6	protein_coding	programmed cell death 6 [Source:HGNC Symbol;Acc:HGNC:8765]	0.462582	4.01632e-06	0.000376008
ZBTB48	protein_coding	zinc finger and BTB domain containing 48 [Source:HGNC Symbol;Acc:HGNC:4930]	0.31693	3.99232e-06	0.000376008
ARRDC4	protein_coding	arrestin domain containing 4 [Source:HGNC Symbol;Acc:HGNC:28087]	-0.455179	4.10752e-06	0.000382
SH3BP5-AS1	lncRNA	SH3BP5 antisense RNA 1 [Source:HGNC Symbol;Acc:HGNC:44501]	0.465783	4.18185e-06	0.000386353
SCD	protein_coding	stearoyl-CoA desaturase [Source:HGNC Symbol;Acc:HGNC:10571]	0.339962	4.22884e-06	0.000388141
CCDC142	protein_coding	coiled-coil domain containing 142 [Source:HGNC Symbol;Acc:HGNC:25889]	0.415571	4.39541e-06	0.00040081
MBD6	protein_coding	methyl-CpG binding domain protein 6 [Source:HGNC Symbol;Acc:HGNC:20445]	0.235306	4.42517e-06	0.00040092
TAPBP	protein_coding	TAP binding protein [Source:HGNC Symbol;Acc:HGNC:11566]	0.272525	4.61919e-06	0.000410553
KCTD7	protein_coding	potassium channel tetramerization domain containing 7 [Source:HGNC Symbol;Acc:HGNC:21957]	0.248871	4.60323e-06	0.000410553
LUC7L3	protein_coding	LUC7 like 3 pre-mRNA splicing factor [Source:HGNC Symbol;Acc:HGNC:24309]	-0.181128	4.60221e-06	0.000410553
MDC1	protein_coding	mediator of DNA damage checkpoint 1 [Source:HGNC Symbol;Acc:HGNC:21163]	0.202927	4.78647e-06	0.000422745
FASN	protein_coding	fatty acid synthase [Source:HGNC Symbol;Acc:HGNC:3594]	0.246255	4.85144e-06	0.000425805
KIAA1522	protein_coding	KIAA1522 [Source:HGNC Symbol;Acc:HGNC:29301]	0.293028	5.24736e-06	0.000456668
NCOR2	protein_coding	nuclear receptor corepressor 2 [Source:HGNC Symbol;Acc:HGNC:7673]	0.218304	5.26812e-06	0.000456668
MRTFA	protein_coding	myocardin related transcription factor A [Source:HGNC Symbol;Acc:HGNC:14334]	0.223701	5.3089e-06	0.00045738
BRWD1	protein_coding	bromodomain and WD repeat domain containing 1 [Source:HGNC Symbol;Acc:HGNC:12760]	-0.202314	5.71025e-06	0.000488958
PGK1	protein_coding	phosphoglycerate kinase 1 [Source:HGNC Symbol;Acc:HGNC:8896]	-0.266796	5.91339e-06	0.000503283
AAK1	protein_coding	AP2 associated kinase 1 [Source:HGNC Symbol;Acc:HGNC:19679]	0.187313	6.02007e-06	0.000509276
ZCCHC14	protein_coding	zinc finger CCHC-type containing 14 [Source:HGNC Symbol;Acc:HGNC:24134]	0.200554	6.09325e-06	0.000512381
SETD1A	protein_coding	SET domain containing 1A, histone lysine methyltransferase [Source:HGNC Symbol;Acc:HGNC:29010]	0.218782	6.15861e-06	0.000514794
C4orf3	protein_coding	chromosome 4 open reading frame 3 [Source:HGNC Symbol;Acc:HGNC:19225]	-0.229635	6.33266e-06	0.00052621
BRD2	protein_coding	bromodomain containing 2 [Source:HGNC Symbol;Acc:HGNC:1103]	0.154861	6.73017e-06	0.000555952
SDHAP1	lncRNA	SDHA pseudogene 1 [Source:NCBI gene (formerly Entrezgene);Acc:255812]	0.65204	6.87821e-06	0.000564858
RAD51-AS1	lncRNA	RAD51 antisense RNA 1 [Source:HGNC Symbol;Acc:HGNC:48621]	0.561704	7.0122e-06	0.000571754
ARHGEF17	protein_coding	Rho guanine nucleotide exchange factor 17 [Source:HGNC Symbol;Acc:HGNC:21726]	0.203827	7.04361e-06	0.000571754
TNC	protein_coding	tenascin C [Source:HGNC Symbol;Acc:HGNC:5318]	0.30392	7.44894e-06	0.000597745
TUBG2	protein_coding	tubulin gamma 2 [Source:HGNC Symbol;Acc:HGNC:12419]	0.263011	7.41694e-06	0.000597745
TGFB1I1	protein_coding	transforming growth factor beta 1 induced transcript 1 [Source:HGNC Symbol;Acc:HGNC:11767]	0.230664	7.51904e-06	0.000599942
POLM	protein_coding	DNA polymerase mu [Source:HGNC Symbol;Acc:HGNC:9185]	0.299729	7.57247e-06	0.000600792
RPS25	protein_coding	ribosomal protein S25 [Source:HGNC Symbol;Acc:HGNC:10413]	-0.173053	7.73704e-06	0.0006104
NHERF1	protein_coding	NHERF family PDZ scaffold protein 1 [Source:HGNC Symbol;Acc:HGNC:11075]	0.320006	7.95291e-06	0.000619625
SPPL2B	protein_coding	signal peptide peptidase like 2B [Source:HGNC Symbol;Acc:HGNC:30627]	0.221841	7.9389e-06	0.000619625
ZNF318	protein_coding	zinc finger protein 318 [Source:HGNC Symbol;Acc:HGNC:13578]	0.202313	8.04953e-06	0.000619625
MT-ND3	protein_coding	mitochondrially encoded NADH:ubiquinone oxidoreductase core subunit 3 [Source:HGNC Symbol;Acc:HGNC:7458]	-0.163247	8.07458e-06	0.000619625
RRAS2	protein_coding	RAS related 2 [Source:HGNC Symbol;Acc:HGNC:17271]	-0.186215	8.05028e-06	0.000619625
PIEZO1	protein_coding	piezo type mechanosensitive ion channel component 1 [Source:HGNC Symbol;Acc:HGNC:28993]	0.162143	8.48318e-06	0.000647442
MECP2	protein_coding	methyl-CpG binding protein 2 [Source:HGNC Symbol;Acc:HGNC:6990]	0.190451	8.61549e-06	0.000653985
CLCN7	protein_coding	chloride voltage-gated channel 7 [Source:HGNC Symbol;Acc:HGNC:2025]	0.214824	8.83055e-06	0.000666706
NFATC2IP	protein_coding	nuclear factor of activated T cells 2 interacting protein [Source:HGNC Symbol;Acc:HGNC:25906]	0.21576	8.9193e-06	0.000669806
DENND2B	protein_coding	DENN domain containing 2B [Source:HGNC Symbol;Acc:HGNC:11350]	0.197869	8.98317e-06	0.000671014
THY1	protein_coding	Thy-1 cell surface antigen [Source:HGNC Symbol;Acc:HGNC:11801]	0.190601	9.13574e-06	0.0006788
PCGF2	protein_coding	polycomb group ring finger 2 [Source:HGNC Symbol;Acc:HGNC:12929]	0.238069	9.3539e-06	0.000691352
FADS2	protein_coding	fatty acid desaturase 2 [Source:HGNC Symbol;Acc:HGNC:3575]	0.299779	9.5166e-06	0.000697656
CIZ1	protein_coding	CDKN1A interacting zinc finger protein 1 [Source:HGNC Symbol;Acc:HGNC:16744]	0.185142	9.53856e-06	0.000697656
RERE	protein_coding	arginine-glutamic acid dipeptide repeats [Source:HGNC Symbol;Acc:HGNC:9965]	0.269698	9.77366e-06	0.000703854
SLC35E2B	protein_coding	solute carrier family 35 member E2B [Source:HGNC Symbol;Acc:HGNC:33941]	0.190419	9.72618e-06	0.000703854
CPNE1	protein_coding	copine 1 [Source:HGNC Symbol;Acc:HGNC:2314]	0.161022	9.69173e-06	0.000703854
LRRC17	protein_coding	leucine rich repeat containing 17 [Source:HGNC Symbol;Acc:HGNC:16895]	-0.155242	1.03083e-05	0.000734261
ANGPTL4	protein_coding	angiopoietin like 4 [Source:HGNC Symbol;Acc:HGNC:16039]	-0.442503	1.03528e-05	0.000734261
TP53I11	protein_coding	tumor protein p53 inducible protein 11 [Source:HGNC Symbol;Acc:HGNC:16842]	0.353138	1.04856e-05	0.000738242
DIDO1	protein_coding	death inducer-obliterator 1 [Source:HGNC Symbol;Acc:HGNC:2680]	0.18173	1.0514e-05	0.000738242
LBHD1	protein_coding	LBH domain containing 1 [Source:HGNC Symbol;Acc:HGNC:28351]	0.64521	1.07506e-05	0.000747378
ZNF292	protein_coding	zinc finger protein 292 [Source:HGNC Symbol;Acc:HGNC:18410]	-0.195489	1.07266e-05	0.000747378
PLXND1	protein_coding	plexin D1 [Source:HGNC Symbol;Acc:HGNC:9107]	0.22116	1.08601e-05	0.000751273
FAM222B	protein_coding	family with sequence similarity 222 member B [Source:HGNC Symbol;Acc:HGNC:25563]	0.236378	1.10706e-05	0.000762081
CLDN15	protein_coding	claudin 15 [Source:HGNC Symbol;Acc:HGNC:2036]	0.509765	1.12102e-05	0.000767929
BAG6	protein_coding	BAG cochaperone 6 [Source:HGNC Symbol;Acc:HGNC:13919]	0.166319	1.14806e-05	0.000782633
BRPF3	protein_coding	bromodomain and PHD finger containing 3 [Source:HGNC Symbol;Acc:HGNC:14256]	0.234951	1.16317e-05	0.000789104
CPSF7	protein_coding	cleavage and polyadenylation specific factor 7 [Source:HGNC Symbol;Acc:HGNC:30098]	0.165493	1.24059e-05	0.000834594
GTF3C1	protein_coding	general transcription factor IIIC subunit 1 [Source:HGNC Symbol;Acc:HGNC:4664]	0.151895	1.24211e-05	0.000834594
RNF10	protein_coding	ring finger protein 10 [Source:HGNC Symbol;Acc:HGNC:10055]	0.160515	1.29837e-05	0.000868239
WBP2	protein_coding	WW domain binding protein 2 [Source:HGNC Symbol;Acc:HGNC:12738]	0.182714	1.3146e-05	0.000874924
SMARCC2	protein_coding	SWI/SNF related, matrix associated, actin dependent regulator of chromatin subfamily c member 2 [Source:HGNC Symbol;Acc:HGNC:11105]	0.171152	1.3295e-05	0.000880671
PPRC1	protein_coding	PPARG related coactivator 1 [Source:HGNC Symbol;Acc:HGNC:30025]	0.195888	1.33613e-05	0.000880908
UBALD1	protein_coding	UBA like domain containing 1 [Source:HGNC Symbol;Acc:HGNC:29576]	0.216239	1.35613e-05	0.00088991
TCF7L2	protein_coding	transcription factor 7 like 2 [Source:HGNC Symbol;Acc:HGNC:11641]	0.253128	1.37518e-05	0.000894057
FNBP4	protein_coding	formin binding protein 4 [Source:HGNC Symbol;Acc:HGNC:19752]	0.192034	1.37489e-05	0.000894057
RPL26	protein_coding	ribosomal protein L26 [Source:HGNC Symbol;Acc:HGNC:10327]	-0.194657	1.41079e-05	0.000912981
PDGFRB	protein_coding	platelet derived growth factor receptor beta [Source:HGNC Symbol;Acc:HGNC:8804]	0.265583	1.42861e-05	0.000920275
ADIRF-AS1	lncRNA	ADIRF antisense RNA 1 [Source:HGNC Symbol;Acc:HGNC:45127]	0.587681	1.45883e-05	0.000928668
RUNX1	protein_coding	RUNX family transcription factor 1 [Source:HGNC Symbol;Acc:HGNC:10471]	0.177601	1.46148e-05	0.000928668
LSS	protein_coding	lanosterol synthase [Source:HGNC Symbol;Acc:HGNC:6708]	0.176143	1.45399e-05	0.000928668
OLFML2B	protein_coding	olfactomedin like 2B [Source:HGNC Symbol;Acc:HGNC:24558]	0.355616	1.47463e-05	0.000932806
ANGEL1	protein_coding	angel homolog 1 [Source:HGNC Symbol;Acc:HGNC:19961]	0.235159	1.48592e-05	0.000935728
RXRA	protein_coding	retinoid X receptor alpha [Source:HGNC Symbol;Acc:HGNC:10477]	0.282434	1.50003e-05	0.000937151
TULP4	protein_coding	TUB like protein 4 [Source:HGNC Symbol;Acc:HGNC:15530]	0.22063	1.50152e-05	0.000937151
KIRREL1	protein_coding	kirre like nephrin family adhesion molecule 1 [Source:HGNC Symbol;Acc:HGNC:15734]	0.148266	1.55685e-05	0.000967383
TMEM104	protein_coding	transmembrane protein 104 [Source:HGNC Symbol;Acc:HGNC:25984]	0.309744	1.57173e-05	0.000972327
NFIX	protein_coding	nuclear factor I X [Source:HGNC Symbol;Acc:HGNC:7788]	0.215268	1.60195e-05	0.000986675
CENATAC	protein_coding	centrosomal AT-AC splicing factor [Source:HGNC Symbol;Acc:HGNC:30460]	0.392105	1.63505e-05	0.00100081
NFIC	protein_coding	nuclear factor I C [Source:HGNC Symbol;Acc:HGNC:7786]	0.176845	1.63915e-05	0.00100081
SF3B1	protein_coding	splicing factor 3b subunit 1 [Source:HGNC Symbol;Acc:HGNC:10768]	-0.15102	1.69591e-05	0.00103098
CXCL8	protein_coding	C-X-C motif chemokine ligand 8 [Source:HGNC Symbol;Acc:HGNC:6025]	-0.287929	1.70386e-05	0.00103135
ASXL1	protein_coding	ASXL transcriptional regulator 1 [Source:HGNC Symbol;Acc:HGNC:18318]	0.157095	1.71183e-05	0.00103172
PDPR	protein_coding	pyruvate dehydrogenase phosphatase regulatory subunit [Source:HGNC Symbol;Acc:HGNC:30264]	0.200036	1.77604e-05	0.00106585
NAA20	protein_coding	N-alpha-acetyltransferase 20, NatB catalytic subunit [Source:HGNC Symbol;Acc:HGNC:15908]	-0.197813	1.78829e-05	0.00106864
PCDHGC3	protein_coding	protocadherin gamma subfamily C, 3 [Source:HGNC Symbol;Acc:HGNC:8716]	0.242006	1.81845e-05	0.00108205
MIR23AHG	lncRNA	miR-23a/27a/24-2 cluster host gene [Source:HGNC Symbol;Acc:HGNC:27620]	0.39709	1.86152e-05	0.00109997
TXLNGY	lncRNA	taxilin gamma pseudogene, Y-linked [Source:NCBI gene (formerly Entrezgene);Acc:246126]	-0.344877	1.86422e-05	0.00109997
KITLG	protein_coding	KIT ligand [Source:HGNC Symbol;Acc:HGNC:6343]	-0.214339	1.99463e-05	0.00117199
TAF1D	protein_coding	TATA-box binding protein associated factor, RNA polymerase I subunit D [Source:HGNC Symbol;Acc:HGNC:28759]	-0.223515	2.02262e-05	0.00118349
NEK7	protein_coding	NIMA related kinase 7 [Source:HGNC Symbol;Acc:HGNC:13386]	-0.177438	2.04824e-05	0.0011935
ECHDC2	protein_coding	enoyl-CoA hydratase domain containing 2 [Source:HGNC Symbol;Acc:HGNC:23408]	0.477729	2.06697e-05	0.00119944
TFE3	protein_coding	transcription factor binding to IGHM enhancer 3 [Source:HGNC Symbol;Acc:HGNC:11752]	0.153338	2.10652e-05	0.00121377
RPS12	protein_coding	ribosomal protein S12 [Source:HGNC Symbol;Acc:HGNC:10385]	-0.204738	2.10896e-05	0.00121377
CRISPLD1	protein_coding	cysteine rich secretory protein LCCL domain containing 1 [Source:HGNC Symbol;Acc:HGNC:18206]	0.724301	2.13722e-05	0.00122502
THBS1	protein_coding	thrombospondin 1 [Source:HGNC Symbol;Acc:HGNC:11785]	0.183064	2.19758e-05	0.00125273
RPL31	protein_coding	ribosomal protein L31 [Source:HGNC Symbol;Acc:HGNC:10334]	-0.170809	2.20341e-05	0.00125273
NAV1	protein_coding	neuron navigator 1 [Source:HGNC Symbol;Acc:HGNC:15989]	0.151289	2.22908e-05	0.00126221
IRF2BPL	protein_coding	interferon regulatory factor 2 binding protein like [Source:HGNC Symbol;Acc:HGNC:14282]	0.242655	2.28086e-05	0.00128635
HTT	protein_coding	huntingtin [Source:HGNC Symbol;Acc:HGNC:4851]	0.156325	2.30403e-05	0.00129422
SREBF1	protein_coding	sterol regulatory element binding transcription factor 1 [Source:HGNC Symbol;Acc:HGNC:11289]	0.274181	2.43411e-05	0.00136184
GBF1	protein_coding	golgi brefeldin A resistant guanine nucleotide exchange factor 1 [Source:HGNC Symbol;Acc:HGNC:4181]	0.157703	2.46224e-05	0.00137211
UBR4	protein_coding	ubiquitin protein ligase E3 component n-recognin 4 [Source:HGNC Symbol;Acc:HGNC:30313]	0.18762	2.48081e-05	0.001377
ZFHX2	protein_coding	zinc finger homeobox 2 [Source:HGNC Symbol;Acc:HGNC:20152]	0.451163	2.5104e-05	0.00138794
HDAC4	protein_coding	histone deacetylase 4 [Source:HGNC Symbol;Acc:HGNC:14063]	0.26698	2.54974e-05	0.00140416
ZNF628	protein_coding	zinc finger protein 628 [Source:HGNC Symbol;Acc:HGNC:28054]	0.326826	2.74175e-05	0.001504
FAM193A	protein_coding	family with sequence similarity 193 member A [Source:HGNC Symbol;Acc:HGNC:16822]	0.221367	2.7561e-05	0.00150599
ADAMTS10	protein_coding	ADAM metallopeptidase with thrombospondin type 1 motif 10 [Source:HGNC Symbol;Acc:HGNC:13201]	0.270651	2.78457e-05	0.00150603
ZNF592	protein_coding	zinc finger protein 592 [Source:HGNC Symbol;Acc:HGNC:28986]	0.232584	2.7697e-05	0.00150603
ABHD4	protein_coding	abhydrolase domain containing 4, N-acyl phospholipase B [Source:HGNC Symbol;Acc:HGNC:20154]	0.207544	2.79906e-05	0.00150603
FAM210B	protein_coding	family with sequence similarity 210 member B [Source:HGNC Symbol;Acc:HGNC:16102]	-0.18854	2.7969e-05	0.00150603
WDR55	protein_coding	WD repeat domain 55 [Source:HGNC Symbol;Acc:HGNC:25971]	0.235325	2.82522e-05	0.0015143
TMEM184B	protein_coding	transmembrane protein 184B [Source:HGNC Symbol;Acc:HGNC:1310]	0.206872	2.84571e-05	0.00151948
CIC	protein_coding	capicua transcriptional repressor [Source:HGNC Symbol;Acc:HGNC:14214]	0.202117	2.93191e-05	0.00155958
ZNF500	protein_coding	zinc finger protein 500 [Source:HGNC Symbol;Acc:HGNC:23716]	0.294636	2.94554e-05	0.00155966
IQCN	protein_coding	IQ motif containing N [Source:HGNC Symbol;Acc:HGNC:29350]	0.695096	2.9905e-05	0.00156709
HUWE1	protein_coding	HECT, UBA and WWE domain containing E3 ubiquitin protein ligase 1 [Source:HGNC Symbol;Acc:HGNC:30892]	0.155027	2.99067e-05	0.00156709
NOTCH2	protein_coding	notch receptor 2 [Source:HGNC Symbol;Acc:HGNC:7882]	0.168291	3.03085e-05	0.00157638
PLXNA1	protein_coding	plexin A1 [Source:HGNC Symbol;Acc:HGNC:9099]	0.157535	3.05035e-05	0.00158067
CNNM2	protein_coding	cyclin and CBS domain divalent metal cation transport mediator 2 [Source:HGNC Symbol;Acc:HGNC:103]	0.32026	3.09212e-05	0.00159642
LRP10	protein_coding	LDL receptor related protein 10 [Source:HGNC Symbol;Acc:HGNC:14553]	0.194459	3.26606e-05	0.00168004
MTSS2	protein_coding	MTSS I-BAR domain containing 2 [Source:HGNC Symbol;Acc:HGNC:25094]	0.277041	3.3338e-05	0.00170863
CTC-338M12.4	lncRNA	uncharacterized LOC101928649 [Source:NCBI gene (formerly Entrezgene);Acc:101928649]	0.602081	3.36983e-05	0.00172082
ZSWIM4	protein_coding	zinc finger SWIM-type containing 4 [Source:HGNC Symbol;Acc:HGNC:25704]	0.29972	3.42338e-05	0.00173768
ATP13A1	protein_coding	ATPase 13A1 [Source:HGNC Symbol;Acc:HGNC:24215]	0.200423	3.43997e-05	0.00173768
SNHG8	lncRNA	small nucleolar RNA host gene 8 [Source:HGNC Symbol;Acc:HGNC:33098]	-0.284038	3.43888e-05	0.00173768
ARAP3	protein_coding	ArfGAP with RhoGAP domain, ankyrin repeat and PH domain 3 [Source:HGNC Symbol;Acc:HGNC:24097]	0.23408	3.50558e-05	0.00176448
BTG1	protein_coding	BTG anti-proliferation factor 1 [Source:HGNC Symbol;Acc:HGNC:1130]	-0.229453	3.55776e-05	0.00178435
LIMK1	protein_coding	LIM domain kinase 1 [Source:HGNC Symbol;Acc:HGNC:6613]	0.194311	3.65974e-05	0.00182737
TLN1	protein_coding	talin 1 [Source:HGNC Symbol;Acc:HGNC:11845]	0.148802	3.66958e-05	0.00182737
CAD	protein_coding	carbamoyl-phosphate synthetase 2, aspartate transcarbamylase, and dihydroorotase [Source:HGNC Symbol;Acc:HGNC:1424]	0.165186	3.7416e-05	0.00185665
EP400	protein_coding	E1A binding protein p400 [Source:HGNC Symbol;Acc:HGNC:11958]	0.184345	3.75853e-05	0.00185849
NACA	protein_coding	nascent polypeptide associated complex subunit alpha [Source:HGNC Symbol;Acc:HGNC:7629]	-0.163535	3.7845e-05	0.00186476
MAST4	protein_coding	microtubule associated serine/threonine kinase family member 4 [Source:HGNC Symbol;Acc:HGNC:19037]	0.231214	3.92024e-05	0.00192233
DAG1	protein_coding	dystroglycan 1 [Source:HGNC Symbol;Acc:HGNC:2666]	0.155411	3.92871e-05	0.00192233
ARAF	protein_coding	A-Raf proto-oncogene, serine/threonine kinase [Source:HGNC Symbol;Acc:HGNC:646]	0.169968	3.95983e-05	0.00193083
POM121C	protein_coding	POM121 transmembrane nucleoporin C [Source:HGNC Symbol;Acc:HGNC:34005]	0.19939	4.05977e-05	0.00197271
ZFYVE19	protein_coding	zinc finger FYVE-type containing 19 [Source:HGNC Symbol;Acc:HGNC:20758]	0.249129	4.08474e-05	0.00197417
DGCR2	protein_coding	DiGeorge syndrome critical region gene 2 [Source:HGNC Symbol;Acc:HGNC:2845]	0.168867	4.09757e-05	0.00197417
TSR3	protein_coding	TSR3 ribosome maturation factor [Source:HGNC Symbol;Acc:HGNC:14175]	-0.212747	4.10495e-05	0.00197417
ZSWIM8	protein_coding	zinc finger SWIM-type containing 8 [Source:HGNC Symbol;Acc:HGNC:23528]	0.18945	4.12545e-05	0.00197726
MT-ND5	protein_coding	mitochondrially encoded NADH:ubiquinone oxidoreductase core subunit 5 [Source:HGNC Symbol;Acc:HGNC:7461]	-0.160019	4.15253e-05	0.00198347
DYSF	protein_coding	dysferlin [Source:HGNC Symbol;Acc:HGNC:3097]	0.229783	4.1937e-05	0.00199592
PANX1	protein_coding	pannexin 1 [Source:HGNC Symbol;Acc:HGNC:8599]	-0.187795	4.20703e-05	0.00199592
MAPKBP1	protein_coding	mitogen-activated protein kinase binding protein 1 [Source:HGNC Symbol;Acc:HGNC:29536]	0.280463	4.29664e-05	0.00203157
ARHGAP32	protein_coding	Rho GTPase activating protein 32 [Source:HGNC Symbol;Acc:HGNC:17399]	0.274167	4.36443e-05	0.0020567
CAPS	protein_coding	calcyphosine [Source:HGNC Symbol;Acc:HGNC:1487]	0.535045	4.40119e-05	0.00206709
ABCC1	protein_coding	ATP binding cassette subfamily C member 1 [Source:HGNC Symbol;Acc:HGNC:51]	0.171706	4.70325e-05	0.00219836
CCT5	protein_coding	chaperonin containing TCP1 subunit 5 [Source:HGNC Symbol;Acc:HGNC:1618]	-0.159932	4.712e-05	0.00219836
MED12	protein_coding	mediator complex subunit 12 [Source:HGNC Symbol;Acc:HGNC:11957]	0.193037	4.7636e-05	0.0022079
AOX1	protein_coding	aldehyde oxidase 1 [Source:HGNC Symbol;Acc:HGNC:553]	-0.223414	4.76389e-05	0.0022079
OGFRL1	protein_coding	opioid growth factor receptor like 1 [Source:HGNC Symbol;Acc:HGNC:21378]	-0.1931	4.81757e-05	0.00221814
CRLS1	protein_coding	cardiolipin synthase 1 [Source:HGNC Symbol;Acc:HGNC:16148]	-0.41509	4.81201e-05	0.00221814
BAZ2A	protein_coding	bromodomain adjacent to zinc finger domain 2A [Source:HGNC Symbol;Acc:HGNC:962]	0.208422	4.89154e-05	0.00224483
CROCCP2	transcribed_unprocessed_pseudogene	CROCC pseudogene 2 [Source:HGNC Symbol;Acc:HGNC:28170]	0.714867	4.96203e-05	0.00225168
MAF	protein_coding	MAF bZIP transcription factor [Source:HGNC Symbol;Acc:HGNC:6776]	0.353874	5.01869e-05	0.00225168
HEYL	protein_coding	hes related family bHLH transcription factor with YRPW motif like [Source:HGNC Symbol;Acc:HGNC:4882]	0.306736	5.01864e-05	0.00225168
TOB1	protein_coding	transducer of ERBB2, 1 [Source:HGNC Symbol;Acc:HGNC:11979]	0.281023	4.92624e-05	0.00225168
AP5B1	protein_coding	adaptor related protein complex 5 subunit beta 1 [Source:HGNC Symbol;Acc:HGNC:25104]	0.236231	4.97177e-05	0.00225168
NBPF9	protein_coding	NBPF member 9 [Source:HGNC Symbol;Acc:HGNC:31991]	0.193844	4.97106e-05	0.00225168
SLC4A7	protein_coding	solute carrier family 4 member 7 [Source:HGNC Symbol;Acc:HGNC:11033]	-0.183928	5.00177e-05	0.00225168
ZC3H15	protein_coding	zinc finger CCCH-type containing 15 [Source:HGNC Symbol;Acc:HGNC:29528]	-0.15636	5.1218e-05	0.00229062
HOOK2	protein_coding	hook microtubule tethering protein 2 [Source:HGNC Symbol;Acc:HGNC:19885]	0.259739	5.15015e-05	0.00229599
TBC1D17	protein_coding	TBC1 domain family member 17 [Source:HGNC Symbol;Acc:HGNC:25699]	0.306959	5.1731e-05	0.00229892
UFM1	protein_coding	ubiquitin fold modifier 1 [Source:HGNC Symbol;Acc:HGNC:20597]	-0.179452	5.2544e-05	0.00232768
FURIN	protein_coding	furin, paired basic amino acid cleaving enzyme [Source:HGNC Symbol;Acc:HGNC:8568]	0.222302	5.34509e-05	0.00235301
PNPLA6	protein_coding	patatin like phospholipase domain containing 6 [Source:HGNC Symbol;Acc:HGNC:16268]	0.270249	5.37763e-05	0.00235994
GARRE1	protein_coding	granule associated Rac and RHOG effector 1 [Source:HGNC Symbol;Acc:HGNC:29016]	0.190997	5.42856e-05	0.00237487
TBC1D10B	protein_coding	TBC1 domain family member 10B [Source:HGNC Symbol;Acc:HGNC:24510]	0.15381	5.44844e-05	0.00237616
DOT1L	protein_coding	DOT1 like histone lysine methyltransferase [Source:HGNC Symbol;Acc:HGNC:24948]	0.184663	5.46538e-05	0.00237617
LTB4R	protein_coding	leukotriene B4 receptor [Source:HGNC Symbol;Acc:HGNC:6713]	0.647969	5.74619e-05	0.00249055
C2orf92	protein_coding	chromosome 2 open reading frame 92 [Source:HGNC Symbol;Acc:HGNC:49272]	0.747394	5.80357e-05	0.00250768
DHX30	protein_coding	DExH-box helicase 30 [Source:HGNC Symbol;Acc:HGNC:16716]	0.14655	5.82251e-05	0.00250815
PRMT9	protein_coding	protein arginine methyltransferase 9 [Source:HGNC Symbol;Acc:HGNC:25099]	-0.240944	5.84259e-05	0.0025091
LTBP2	protein_coding	latent transforming growth factor beta binding protein 2 [Source:HGNC Symbol;Acc:HGNC:6715]	0.169252	5.869e-05	0.00251276
EIF2B3	protein_coding	eukaryotic translation initiation factor 2B subunit gamma [Source:HGNC Symbol;Acc:HGNC:3259]	-0.191758	5.92496e-05	0.002529
DIP2A	protein_coding	disco interacting protein 2 homolog A [Source:HGNC Symbol;Acc:HGNC:17217]	0.199459	6.0421e-05	0.00257119
VDAC1	protein_coding	voltage dependent anion channel 1 [Source:HGNC Symbol;Acc:HGNC:12669]	-0.165509	6.17102e-05	0.00261023
GNL3	protein_coding	G protein nucleolar 3 [Source:HGNC Symbol;Acc:HGNC:29931]	-0.16835	6.46893e-05	0.00271174
ZDHHC17	protein_coding	zinc finger DHHC-type palmitoyltransferase 17 [Source:HGNC Symbol;Acc:HGNC:18412]	-0.177525	6.44254e-05	0.00271174
RPS18	protein_coding	ribosomal protein S18 [Source:HGNC Symbol;Acc:HGNC:10401]	-0.186709	6.46849e-05	0.00271174
CNNM3	protein_coding	cyclin and CBS domain divalent metal cation transport mediator 3 [Source:HGNC Symbol;Acc:HGNC:104]	0.262074	6.53158e-05	0.00272985
TOB2	protein_coding	transducer of ERBB2, 2 [Source:HGNC Symbol;Acc:HGNC:11980]	0.178143	6.67427e-05	0.00277519
CBL	protein_coding	Cbl proto-oncogene [Source:HGNC Symbol;Acc:HGNC:1541]	0.168761	6.67959e-05	0.00277519
ZFTRAF1	protein_coding	zinc finger TRAF-type containing 1 [Source:HGNC Symbol;Acc:HGNC:17806]	0.293797	6.72703e-05	0.00278666
TENM4	protein_coding	teneurin transmembrane protein 4 [Source:HGNC Symbol;Acc:HGNC:29945]	0.243066	6.83866e-05	0.00281879
IRGQ	protein_coding	immunity related GTPase Q [Source:HGNC Symbol;Acc:HGNC:24868]	0.203452	6.84474e-05	0.00281879
ARRDC3	protein_coding	arrestin domain containing 3 [Source:HGNC Symbol;Acc:HGNC:29263]	-0.371461	6.96976e-05	0.00286188
LMOD1	protein_coding	leiomodin 1 [Source:HGNC Symbol;Acc:HGNC:6647]	0.194144	7.06895e-05	0.00288729
DRG1	protein_coding	developmentally regulated GTP binding protein 1 [Source:HGNC Symbol;Acc:HGNC:3029]	-0.164094	7.07277e-05	0.00288729
PI4KA	protein_coding	phosphatidylinositol 4-kinase alpha [Source:HGNC Symbol;Acc:HGNC:8983]	0.186506	7.12782e-05	0.00290133
IFT140	protein_coding	intraflagellar transport 140 [Source:HGNC Symbol;Acc:HGNC:29077]	0.227406	7.18649e-05	0.00290835
MTA1	protein_coding	metastasis associated 1 [Source:HGNC Symbol;Acc:HGNC:7410]	0.173415	7.17848e-05	0.00290835
SEC61G	protein_coding	SEC61 translocon subunit gamma [Source:HGNC Symbol;Acc:HGNC:18277]	-0.194336	7.3415e-05	0.00296255
UPF1	protein_coding	UPF1 RNA helicase and ATPase [Source:HGNC Symbol;Acc:HGNC:9962]	0.162864	7.38254e-05	0.00297057
NOP16	protein_coding	NOP16 nucleolar protein [Source:HGNC Symbol;Acc:HGNC:26934]	-0.271106	7.42209e-05	0.00297795
SLC2A11	protein_coding	solute carrier family 2 member 11 [Source:HGNC Symbol;Acc:HGNC:14239]	0.416384	7.45381e-05	0.00298216
WDR41	protein_coding	WD repeat domain 41 [Source:HGNC Symbol;Acc:HGNC:25601]	-0.161913	7.55612e-05	0.0030145
ZNF606-AS1	lncRNA	ZNF606 antisense RNA 1 [Source:HGNC Symbol;Acc:HGNC:44322]	0.381961	7.63078e-05	0.00302802
APCDD1L	protein_coding	APC down-regulated 1 like [Source:HGNC Symbol;Acc:HGNC:26892]	0.25994	7.63312e-05	0.00302802
SGCA	protein_coding	sarcoglycan alpha [Source:HGNC Symbol;Acc:HGNC:10805]	0.267123	7.68947e-05	0.00304178
HSPD1	protein_coding	heat shock protein family D (Hsp60) member 1 [Source:HGNC Symbol;Acc:HGNC:5261]	-0.188108	7.75958e-05	0.00306089
CLSTN1	protein_coding	calsyntenin 1 [Source:HGNC Symbol;Acc:HGNC:17447]	0.149759	7.89326e-05	0.0031049
RPL36	protein_coding	ribosomal protein L36 [Source:HGNC Symbol;Acc:HGNC:13631]	-0.171844	8.00268e-05	0.00313915
CLEC16A	protein_coding	C-type lectin domain containing 16A [Source:HGNC Symbol;Acc:HGNC:29013]	0.196291	8.04133e-05	0.00314553
TPI1	protein_coding	triosephosphate isomerase 1 [Source:HGNC Symbol;Acc:HGNC:12009]	-0.217411	8.42719e-05	0.0032873
ABCA7	protein_coding	ATP binding cassette subfamily A member 7 [Source:HGNC Symbol;Acc:HGNC:37]	0.401065	8.63195e-05	0.00335785
MNT	protein_coding	MAX network transcriptional repressor [Source:HGNC Symbol;Acc:HGNC:7188]	0.234272	8.77876e-05	0.00340553
IBTK	protein_coding	inhibitor of Bruton tyrosine kinase [Source:HGNC Symbol;Acc:HGNC:17853]	-0.14385	8.89558e-05	0.00343372
SRSF7	protein_coding	serine and arginine rich splicing factor 7 [Source:HGNC Symbol;Acc:HGNC:10789]	-0.210604	8.90034e-05	0.00343372
ZBTB7A	protein_coding	zinc finger and BTB domain containing 7A [Source:HGNC Symbol;Acc:HGNC:18078]	0.1908	8.94844e-05	0.00344282
FKBP9	protein_coding	FKBP prolyl isomerase 9 [Source:HGNC Symbol;Acc:HGNC:3725]	0.141981	9.00107e-05	0.00345361
GMFB	protein_coding	glia maturation factor beta [Source:HGNC Symbol;Acc:HGNC:4373]	-0.157734	9.14441e-05	0.00349904
JAM2	protein_coding	junctional adhesion molecule 2 [Source:HGNC Symbol;Acc:HGNC:14686]	0.491193	9.20541e-05	0.00350724
MT-TA	Mt_tRNA	mitochondrially encoded tRNA-Ala (GCN) [Source:HGNC Symbol;Acc:HGNC:7475]	-0.857759	9.21577e-05	0.00350724
ASB16-AS1	lncRNA	ASB16 antisense RNA 1 [Source:HGNC Symbol;Acc:HGNC:25442]	0.306626	9.24462e-05	0.00350871
DAB2IP	protein_coding	DAB2 interacting protein [Source:HGNC Symbol;Acc:HGNC:17294]	0.211145	9.27996e-05	0.00351263
GATAD2B	protein_coding	GATA zinc finger domain containing 2B [Source:HGNC Symbol;Acc:HGNC:30778]	0.194529	9.40059e-05	0.00353921
EVC	protein_coding	EvC ciliary complex subunit 1 [Source:HGNC Symbol;Acc:HGNC:3497]	0.184579	9.39383e-05	0.00353921
MDM4	protein_coding	MDM4 regulator of p53 [Source:HGNC Symbol;Acc:HGNC:6974]	0.230181	9.6475e-05	0.0036128
PRKACA	protein_coding	protein kinase cAMP-activated catalytic subunit alpha [Source:HGNC Symbol;Acc:HGNC:9380]	0.159931	9.63692e-05	0.0036128
LIMS2	protein_coding	LIM zinc finger domain containing 2 [Source:HGNC Symbol;Acc:HGNC:16084]	0.309581	9.82171e-05	0.00365852
CPT1C	protein_coding	carnitine palmitoyltransferase 1C [Source:HGNC Symbol;Acc:HGNC:18540]	0.261143	9.81563e-05	0.00365852
PLEKHM1	protein_coding	pleckstrin homology and RUN domain containing M1 [Source:HGNC Symbol;Acc:HGNC:29017]	0.181426	9.88147e-05	0.00367105
HYPK	protein_coding	huntingtin interacting protein K [Source:HGNC Symbol;Acc:HGNC:18418]	0.701571	9.99279e-05	0.003679
GLI4	protein_coding	GLI family zinc finger 4 [Source:HGNC Symbol;Acc:HGNC:4320]	0.389053	0.00010018	0.003679
PPARA	protein_coding	peroxisome proliferator activated receptor alpha [Source:HGNC Symbol;Acc:HGNC:9232]	0.306818	9.95399e-05	0.003679
ALPK3	protein_coding	alpha kinase 3 [Source:HGNC Symbol;Acc:HGNC:17574]	0.253227	9.96896e-05	0.003679
CAMTA2	protein_coding	calmodulin binding transcription activator 2 [Source:HGNC Symbol;Acc:HGNC:18807]	0.196918	0.000100339	0.003679
FAN1	protein_coding	FANCD2 and FANCI associated nuclease 1 [Source:HGNC Symbol;Acc:HGNC:29170]	0.165146	0.000101922	0.00372731
LPIN1	protein_coding	lipin 1 [Source:HGNC Symbol;Acc:HGNC:13345]	0.203858	0.000102618	0.00374302
ZHX2	protein_coding	zinc fingers and homeoboxes 2 [Source:HGNC Symbol;Acc:HGNC:18513]	0.232223	0.000105116	0.0037658
PHYKPL	protein_coding	5-phosphohydroxy-L-lysine phospho-lyase [Source:HGNC Symbol;Acc:HGNC:28249]	0.227875	0.000104795	0.0037658
TARS1	protein_coding	threonyl-tRNA synthetase 1 [Source:HGNC Symbol;Acc:HGNC:11572]	-0.130891	0.000104772	0.0037658
UBA6	protein_coding	ubiquitin like modifier activating enzyme 6 [Source:HGNC Symbol;Acc:HGNC:25581]	-0.14922	0.000105079	0.0037658
PCNA	protein_coding	proliferating cell nuclear antigen [Source:HGNC Symbol;Acc:HGNC:8729]	-0.187049	0.000104153	0.0037658
ZRANB2	protein_coding	zinc finger RANBP2-type containing 2 [Source:HGNC Symbol;Acc:HGNC:13058]	-0.195948	0.000104373	0.0037658
LRP11	protein_coding	LDL receptor related protein 11 [Source:HGNC Symbol;Acc:HGNC:16936]	-0.295545	0.000105119	0.0037658
PXDN	protein_coding	peroxidasin [Source:HGNC Symbol;Acc:HGNC:14966]	0.139151	0.000105558	0.00377188
LPCAT3	protein_coding	lysophosphatidylcholine acyltransferase 3 [Source:HGNC Symbol;Acc:HGNC:30244]	0.220502	0.000106882	0.00378085
EPRS1	protein_coding	glutamyl-prolyl-tRNA synthetase 1 [Source:HGNC Symbol;Acc:HGNC:3418]	-0.144891	0.000106868	0.00378085
PHIP	protein_coding	pleckstrin homology domain interacting protein [Source:HGNC Symbol;Acc:HGNC:15673]	-0.188658	0.000106886	0.00378085
EHMT2	protein_coding	euchromatic histone lysine methyltransferase 2 [Source:HGNC Symbol;Acc:HGNC:14129]	0.188549	0.000109926	0.00384959
SCAP	protein_coding	SREBF chaperone [Source:HGNC Symbol;Acc:HGNC:30634]	0.166897	0.000109841	0.00384959
GLO1	protein_coding	glyoxalase I [Source:HGNC Symbol;Acc:HGNC:4323]	-0.165464	0.000109343	0.00384959
SEM1	protein_coding	SEM1 26S proteasome subunit [Source:HGNC Symbol;Acc:HGNC:10845]	-0.197283	0.000109516	0.00384959
ARHGEF10	protein_coding	Rho guanine nucleotide exchange factor 10 [Source:HGNC Symbol;Acc:HGNC:14103]	0.658196	0.000111942	0.00388231
GLIS2	protein_coding	GLIS family zinc finger 2 [Source:HGNC Symbol;Acc:HGNC:29450]	0.256587	0.000111966	0.00388231
EDC4	protein_coding	enhancer of mRNA decapping 4 [Source:HGNC Symbol;Acc:HGNC:17157]	0.167354	0.000111497	0.00388231
MICALL1	protein_coding	MICAL like 1 [Source:HGNC Symbol;Acc:HGNC:29804]	0.167229	0.00011127	0.00388231
ANKS3	protein_coding	ankyrin repeat and sterile alpha motif domain containing 3 [Source:HGNC Symbol;Acc:HGNC:29422]	0.275983	0.000112383	0.00388717
DNAJC2	protein_coding	DnaJ heat shock protein family (Hsp40) member C2 [Source:HGNC Symbol;Acc:HGNC:13192]	-0.198019	0.000113657	0.0039216
SPG7	protein_coding	SPG7 matrix AAA peptidase subunit, paraplegin [Source:HGNC Symbol;Acc:HGNC:11237]	0.172935	0.000114412	0.00393794
TSC22D4	protein_coding	TSC22 domain family member 4 [Source:HGNC Symbol;Acc:HGNC:21696]	0.212897	0.000115422	0.003963
SMURF2	protein_coding	SMAD specific E3 ubiquitin protein ligase 2 [Source:HGNC Symbol;Acc:HGNC:16809]	-0.268409	0.000116962	0.00400608
TNK2	protein_coding	tyrosine kinase non receptor 2 [Source:HGNC Symbol;Acc:HGNC:19297]	0.232675	0.00011785	0.00402668
ITGB1	protein_coding	integrin subunit beta 1 [Source:HGNC Symbol;Acc:HGNC:6153]	-0.121928	0.000118291	0.00403193
TRBV12-4	TR_V_gene	T cell receptor beta variable 12-4 [Source:HGNC Symbol;Acc:HGNC:12186]	-0.644911	0.000120388	0.00409347
DCAF8	protein_coding	DDB1 and CUL4 associated factor 8 [Source:HGNC Symbol;Acc:HGNC:24891]	0.180001	0.000121703	0.00410887
FLYWCH1	protein_coding	FLYWCH-type zinc finger 1 [Source:HGNC Symbol;Acc:HGNC:25404]	0.173249	0.000121643	0.00410887
SNRPD2	protein_coding	small nuclear ribonucleoprotein D2 polypeptide [Source:HGNC Symbol;Acc:HGNC:11159]	-0.17714	0.000121718	0.00410887
RARG	protein_coding	retinoic acid receptor gamma [Source:HGNC Symbol;Acc:HGNC:9866]	0.211057	0.000124053	0.00417473
HSP90B1	protein_coding	heat shock protein 90 beta family member 1 [Source:HGNC Symbol;Acc:HGNC:12028]	-0.156114	0.000124264	0.00417473
PDCD1LG2	protein_coding	programmed cell death 1 ligand 2 [Source:HGNC Symbol;Acc:HGNC:18731]	-0.194412	0.000125218	0.00419674
FNDC1	protein_coding	fibronectin type III domain containing 1 [Source:HGNC Symbol;Acc:HGNC:21184]	0.400591	0.000128667	0.00430206
C1orf56	protein_coding	chromosome 1 open reading frame 56 [Source:HGNC Symbol;Acc:HGNC:26045]	0.483289	0.000129507	0.00430964
RANBP2	protein_coding	RAN binding protein 2 [Source:HGNC Symbol;Acc:HGNC:9848]	-0.162351	0.000129432	0.00430964
PAX8-AS1	lncRNA	PAX8 antisense RNA 1 [Source:HGNC Symbol;Acc:HGNC:49271]	0.272704	0.000129885	0.00431199
RPL10	protein_coding	ribosomal protein L10 [Source:HGNC Symbol;Acc:HGNC:10298]	-0.171006	0.000132629	0.00438237
ZNF300	protein_coding	zinc finger protein 300 [Source:HGNC Symbol;Acc:HGNC:13091]	-0.250212	0.000132337	0.00438237
SNX27	protein_coding	sorting nexin 27 [Source:HGNC Symbol;Acc:HGNC:20073]	0.188396	0.000134851	0.00444532
TNS2	protein_coding	tensin 2 [Source:HGNC Symbol;Acc:HGNC:19737]	0.164882	0.000135181	0.00444578
JRK	protein_coding	Jrk helix-turn-helix protein [Source:HGNC Symbol;Acc:HGNC:6199]	0.178261	0.000135972	0.00446136
C4orf48	protein_coding	chromosome 4 open reading frame 48 [Source:HGNC Symbol;Acc:HGNC:34437]	-0.328714	0.000136773	0.00447716
PRRC2A	protein_coding	proline rich coiled-coil 2A [Source:HGNC Symbol;Acc:HGNC:13918]	0.132829	0.00013728	0.00448329
LRP5	protein_coding	LDL receptor related protein 5 [Source:HGNC Symbol;Acc:HGNC:6697]	0.19403	0.000138253	0.00450462
RAB32	protein_coding	RAB32, member RAS oncogene family [Source:HGNC Symbol;Acc:HGNC:9772]	-0.182302	0.000139073	0.00452083
RPL11	protein_coding	ribosomal protein L11 [Source:HGNC Symbol;Acc:HGNC:10301]	-0.163043	0.00013952	0.00452489
TTYH3	protein_coding	tweety family member 3 [Source:HGNC Symbol;Acc:HGNC:22222]	0.199434	0.000140094	0.00453303
RFX1	protein_coding	regulatory factor X1 [Source:HGNC Symbol;Acc:HGNC:9982]	0.246653	0.000142012	0.00457191
CEBPZ	protein_coding	CCAAT enhancer binding protein zeta [Source:HGNC Symbol;Acc:HGNC:24218]	-0.166314	0.000142132	0.00457191
ANKRD37	protein_coding	ankyrin repeat domain 37 [Source:HGNC Symbol;Acc:HGNC:29593]	-0.415038	0.000142272	0.00457191
NYNRIN	protein_coding	NYN domain and retroviral integrase containing [Source:HGNC Symbol;Acc:HGNC:20165]	0.263824	0.000143876	0.00461228
ZER1	protein_coding	zyg-11 related cell cycle regulator [Source:HGNC Symbol;Acc:HGNC:30960]	0.160639	0.000144185	0.00461228
PDK3	protein_coding	pyruvate dehydrogenase kinase 3 [Source:HGNC Symbol;Acc:HGNC:8811]	-0.320395	0.000144925	0.00462541
STIM1	protein_coding	stromal interaction molecule 1 [Source:HGNC Symbol;Acc:HGNC:11386]	0.178575	0.000146744	0.00467285
PLPPR2	protein_coding	phospholipid phosphatase related 2 [Source:HGNC Symbol;Acc:HGNC:29566]	0.235177	0.000151383	0.00479881
PCBP2	protein_coding	poly(rC) binding protein 2 [Source:HGNC Symbol;Acc:HGNC:8648]	0.143397	0.000151377	0.00479881
DVL3	protein_coding	dishevelled segment polarity protein 3 [Source:HGNC Symbol;Acc:HGNC:3087]	0.145142	0.000152766	0.00483173
SSC5D	protein_coding	scavenger receptor cysteine rich family member with 5 domains [Source:HGNC Symbol;Acc:HGNC:26641]	0.25554	0.000153724	0.00484023
ZNF627	protein_coding	zinc finger protein 627 [Source:HGNC Symbol;Acc:HGNC:30570]	-0.216902	0.000153445	0.00484023
PER3	protein_coding	period circadian regulator 3 [Source:HGNC Symbol;Acc:HGNC:8847]	0.253566	0.000157064	0.00493434
ZNF408	protein_coding	zinc finger protein 408 [Source:HGNC Symbol;Acc:HGNC:20041]	0.257103	0.000157845	0.00494782
SPOCK1	protein_coding	SPARC (osteonectin), cwcv and kazal like domains proteoglycan 1 [Source:HGNC Symbol;Acc:HGNC:11251]	0.247491	0.000158515	0.00495775
AEBP1	protein_coding	AE binding protein 1 [Source:HGNC Symbol;Acc:HGNC:303]	0.270575	0.000158944	0.00496012
PFDN2	protein_coding	prefoldin subunit 2 [Source:HGNC Symbol;Acc:HGNC:8867]	-0.214115	0.000159521	0.00496709
PGS1	protein_coding	phosphatidylglycerophosphate synthase 1 [Source:HGNC Symbol;Acc:HGNC:30029]	0.208705	0.000161083	0.00500463
FGD1	protein_coding	FYVE, RhoGEF and PH domain containing 1 [Source:HGNC Symbol;Acc:HGNC:3663]	0.221298	0.000161573	0.00500877
KIF3C	protein_coding	kinesin family member 3C [Source:HGNC Symbol;Acc:HGNC:6321]	0.173464	0.000163461	0.00505166
STX16	protein_coding	syntaxin 16 [Source:HGNC Symbol;Acc:HGNC:11431]	0.170569	0.000163676	0.00505166
SETD5	protein_coding	SET domain containing 5 [Source:HGNC Symbol;Acc:HGNC:25566]	0.151656	0.000164965	0.00506916
STMN3	protein_coding	stathmin 3 [Source:HGNC Symbol;Acc:HGNC:15926]	-0.327977	0.000164765	0.00506916
ZNF335	protein_coding	zinc finger protein 335 [Source:HGNC Symbol;Acc:HGNC:15807]	0.192598	0.000168232	0.00515826
YBX3	protein_coding	Y-box binding protein 3 [Source:HGNC Symbol;Acc:HGNC:2428]	-0.175186	0.000170756	0.00521289
CDC37L1	protein_coding	cell division cycle 37 like 1, HSP90 cochaperone [Source:HGNC Symbol;Acc:HGNC:17179]	-0.200474	0.000170637	0.00521289
SLC12A4	protein_coding	solute carrier family 12 member 4 [Source:HGNC Symbol;Acc:HGNC:10913]	0.145012	0.000172372	0.00525079
YJU2B	protein_coding	YJU2 splicing factor homolog B [Source:HGNC Symbol;Acc:HGNC:28118]	0.230491	0.000173231	0.00526555
BCL6	protein_coding	BCL6 transcription repressor [Source:HGNC Symbol;Acc:HGNC:1001]	0.28405	0.000174517	0.00528176
ZNF880	protein_coding	zinc finger protein 880 [Source:HGNC Symbol;Acc:HGNC:37249]	-0.259388	0.000174396	0.00528176
PKNOX2	protein_coding	PBX/knotted 1 homeobox 2 [Source:HGNC Symbol;Acc:HGNC:16714]	0.238371	0.000175002	0.00528375
TPM3	protein_coding	tropomyosin 3 [Source:HGNC Symbol;Acc:HGNC:12012]	-0.129194	0.000175335	0.00528375
KMT2D	protein_coding	lysine methyltransferase 2D [Source:HGNC Symbol;Acc:HGNC:7133]	0.18561	0.00017578	0.00528582
ZNF284	protein_coding	zinc finger protein 284 [Source:HGNC Symbol;Acc:HGNC:13078]	0.440489	0.000177726	0.00533291
HSP90AA1	protein_coding	heat shock protein 90 alpha family class A member 1 [Source:HGNC Symbol;Acc:HGNC:5253]	-0.197824	0.000178163	0.00533464
ATG2A	protein_coding	autophagy related 2A [Source:HGNC Symbol;Acc:HGNC:29028]	0.201071	0.000183269	0.00546422
EIF3E	protein_coding	eukaryotic translation initiation factor 3 subunit E [Source:HGNC Symbol;Acc:HGNC:3277]	-0.149044	0.000183085	0.00546422
DNAH1	protein_coding	dynein axonemal heavy chain 1 [Source:HGNC Symbol;Acc:HGNC:2940]	0.338729	0.000183853	0.00547001
TAF1C	protein_coding	TATA-box binding protein associated factor, RNA polymerase I subunit C [Source:HGNC Symbol;Acc:HGNC:11534]	0.191635	0.000185254	0.00550003
BCORL1	protein_coding	BCL6 corepressor like 1 [Source:HGNC Symbol;Acc:HGNC:25657]	0.253099	0.000187178	0.00552215
NUP107	protein_coding	nucleoporin 107 [Source:HGNC Symbol;Acc:HGNC:29914]	-0.21379	0.000186515	0.00552215
CDKN2B-AS1	lncRNA	CDKN2B antisense RNA 1 [Source:HGNC Symbol;Acc:HGNC:34341]	-0.475644	0.000186849	0.00552215
ATF7	protein_coding	activating transcription factor 7 [Source:HGNC Symbol;Acc:HGNC:792]	0.179815	0.000187806	0.00552905
SERBP1	protein_coding	SERPINE1 mRNA binding protein 1 [Source:HGNC Symbol;Acc:HGNC:17860]	-0.142886	0.000191339	0.00560598
BCAT1	protein_coding	branched chain amino acid transaminase 1 [Source:HGNC Symbol;Acc:HGNC:976]	-0.144451	0.000191617	0.00560598
RPL29	protein_coding	ribosomal protein L29 [Source:HGNC Symbol;Acc:HGNC:10331]	-0.1477	0.000191029	0.00560598
YBX1	protein_coding	Y-box binding protein 1 [Source:HGNC Symbol;Acc:HGNC:8014]	-0.150022	0.000193272	0.00564266
MAP1A	protein_coding	microtubule associated protein 1A [Source:HGNC Symbol;Acc:HGNC:6835]	0.201615	0.000196106	0.00571352
KRT80	protein_coding	keratin 80 [Source:HGNC Symbol;Acc:HGNC:27056]	0.18395	0.000198247	0.00576394
KLF5	protein_coding	KLF transcription factor 5 [Source:HGNC Symbol;Acc:HGNC:6349]	0.310267	0.000200748	0.00581809
FAM234A	protein_coding	family with sequence similarity 234 member A [Source:HGNC Symbol;Acc:HGNC:14163]	0.16485	0.000200938	0.00581809
BCAM	protein_coding	basal cell adhesion molecule (Lutheran blood group) [Source:HGNC Symbol;Acc:HGNC:6722]	0.392309	0.000202238	0.00584367
TNXB	protein_coding	tenascin XB [Source:HGNC Symbol;Acc:HGNC:11976]	0.810191	0.000203155	0.00584613
SPTB	protein_coding	spectrin beta, erythrocytic [Source:HGNC Symbol;Acc:HGNC:11274]	1.19956	0.0002029	0.00584613
CREB3L1	protein_coding	cAMP responsive element binding protein 3 like 1 [Source:HGNC Symbol;Acc:HGNC:18856]	0.198308	0.000204607	0.00587586
EBPL	protein_coding	EBP like [Source:HGNC Symbol;Acc:HGNC:18061]	-0.229461	0.000205926	0.00590167
CELSR2	protein_coding	cadherin EGF LAG seven-pass G-type receptor 2 [Source:HGNC Symbol;Acc:HGNC:3231]	0.285128	0.000210165	0.00601088
TAX1BP1	protein_coding	Tax1 binding protein 1 [Source:HGNC Symbol;Acc:HGNC:11575]	-0.130133	0.00021092	0.00602023
TMEM44	protein_coding	transmembrane protein 44 [Source:HGNC Symbol;Acc:HGNC:25120]	0.225838	0.000211727	0.00602638
SLC66A1	protein_coding	solute carrier family 66 member 1 [Source:HGNC Symbol;Acc:HGNC:26001]	0.217655	0.000211994	0.00602638
MLXIP	protein_coding	MLX interacting protein [Source:HGNC Symbol;Acc:HGNC:17055]	0.187698	0.000217063	0.00615801
FEM1B	protein_coding	fem-1 homolog B [Source:HGNC Symbol;Acc:HGNC:3649]	-0.17072	0.000218366	0.00618248
RPL6	protein_coding	ribosomal protein L6 [Source:HGNC Symbol;Acc:HGNC:10362]	-0.125769	0.00021997	0.00621536
TANC2	protein_coding	tetratricopeptide repeat, ankyrin repeat and coiled-coil containing 2 [Source:HGNC Symbol;Acc:HGNC:30212]	0.171679	0.000222049	0.00626152
SIK3	protein_coding	SIK family kinase 3 [Source:HGNC Symbol;Acc:HGNC:29165]	0.214185	0.00022453	0.0063173
TNRC18	protein_coding	trinucleotide repeat containing 18 [Source:HGNC Symbol;Acc:HGNC:11962]	0.176091	0.000224927	0.0063173
DENND4B	protein_coding	DENN domain containing 4B [Source:HGNC Symbol;Acc:HGNC:29044]	0.168213	0.00022642	0.00632354
RBM25	protein_coding	RNA binding motif protein 25 [Source:HGNC Symbol;Acc:HGNC:23244]	-0.131839	0.000226223	0.00632354
ZNF267	protein_coding	zinc finger protein 267 [Source:HGNC Symbol;Acc:HGNC:13060]	-0.244487	0.0002265	0.00632354
RPL22L1	protein_coding	ribosomal protein L22 like 1 [Source:HGNC Symbol;Acc:HGNC:27610]	-0.147927	0.000228971	0.00637983
TSC2	protein_coding	TSC complex subunit 2 [Source:HGNC Symbol;Acc:HGNC:12363]	0.164267	0.000229986	0.00639544
PTAR1	protein_coding	protein prenyltransferase alpha subunit repeat containing 1 [Source:HGNC Symbol;Acc:HGNC:30449]	-0.166932	0.000232232	0.00644512
DDR2	protein_coding	discoidin domain receptor tyrosine kinase 2 [Source:HGNC Symbol;Acc:HGNC:2731]	-0.138218	0.000235598	0.00652566
PPP1R10	protein_coding	protein phosphatase 1 regulatory subunit 10 [Source:HGNC Symbol;Acc:HGNC:9284]	0.18775	0.000237114	0.00653957
ZNF618	protein_coding	zinc finger protein 618 [Source:HGNC Symbol;Acc:HGNC:29416]	0.166145	0.000237498	0.00653957
FAU	protein_coding	FAU ubiquitin like and ribosomal protein S30 fusion [Source:HGNC Symbol;Acc:HGNC:3597]	-0.154088	0.000236977	0.00653957
TNS1	protein_coding	tensin 1 [Source:HGNC Symbol;Acc:HGNC:11973]	0.189198	0.000239593	0.00657148
ACSL5	protein_coding	acyl-CoA synthetase long chain family member 5 [Source:HGNC Symbol;Acc:HGNC:16526]	-0.423953	0.000239424	0.00657148
FARSB	protein_coding	phenylalanyl-tRNA synthetase subunit beta [Source:HGNC Symbol;Acc:HGNC:17800]	-0.211586	0.000240523	0.00658413
ZNF767P	lncRNA	zinc finger family member 767, pseudogene [Source:NCBI gene (formerly Entrezgene);Acc:79970]	0.402045	0.000247207	0.00675395
CSAD	protein_coding	cysteine sulfinic acid decarboxylase [Source:HGNC Symbol;Acc:HGNC:18966]	0.366838	0.00024819	0.00676762
AP1G2-AS1	lncRNA	AP1G2 antisense RNA 1 [Source:HGNC Symbol;Acc:HGNC:55442]	0.452072	0.000250337	0.00681295
RABEP1	protein_coding	rabaptin, RAB GTPase binding effector protein 1 [Source:HGNC Symbol;Acc:HGNC:17677]	-0.134467	0.000250838	0.00681338
RPS8	protein_coding	ribosomal protein S8 [Source:HGNC Symbol;Acc:HGNC:10441]	-0.139857	0.000251485	0.00681776
JPH2	protein_coding	junctophilin 2 [Source:HGNC Symbol;Acc:HGNC:14202]	0.313539	0.000253985	0.00687227
ATR	protein_coding	ATR serine/threonine kinase [Source:HGNC Symbol;Acc:HGNC:882]	-0.18354	0.00025611	0.00691644
IGF1R	protein_coding	insulin like growth factor 1 receptor [Source:HGNC Symbol;Acc:HGNC:5465]	0.211872	0.000258043	0.00693761
TMEM63B	protein_coding	transmembrane protein 63B [Source:HGNC Symbol;Acc:HGNC:17735]	0.155118	0.000258376	0.00693761
SNX6	protein_coding	sorting nexin 6 [Source:HGNC Symbol;Acc:HGNC:14970]	-0.138408	0.000257983	0.00693761
FAM227A	protein_coding	family with sequence similarity 227 member A [Source:HGNC Symbol;Acc:HGNC:44197]	0.532744	0.000259037	0.0069421
MARCKS	protein_coding	myristoylated alanine rich protein kinase C substrate [Source:HGNC Symbol;Acc:HGNC:6759]	-0.149365	0.000259643	0.00694507
SORBS3	protein_coding	sorbin and SH3 domain containing 3 [Source:HGNC Symbol;Acc:HGNC:30907]	0.170966	0.000263681	0.00703969
CNBP	protein_coding	CCHC-type zinc finger nucleic acid binding protein [Source:HGNC Symbol;Acc:HGNC:13164]	-0.125776	0.000264728	0.00705422
PYGO2	protein_coding	pygopus family PHD finger 2 [Source:HGNC Symbol;Acc:HGNC:30257]	0.172309	0.000266368	0.00708448
SLITRK5	protein_coding	SLIT and NTRK like family member 5 [Source:HGNC Symbol;Acc:HGNC:20295]	0.518111	0.000272754	0.00724061
SREK1	protein_coding	splicing regulatory glutamic acid and lysine rich protein 1 [Source:HGNC Symbol;Acc:HGNC:17882]	-0.159369	0.000273535	0.00724764
NDUFB3	protein_coding	NADH:ubiquinone oxidoreductase subunit B3 [Source:HGNC Symbol;Acc:HGNC:7698]	-0.169779	0.000281323	0.00743995
NOTCH1	protein_coding	notch receptor 1 [Source:HGNC Symbol;Acc:HGNC:7881]	0.216935	0.000282074	0.00744579
G6PD	protein_coding	glucose-6-phosphate dehydrogenase [Source:HGNC Symbol;Acc:HGNC:4057]	0.170444	0.000283087	0.00745853
SMIM20	protein_coding	small integral membrane protein 20 [Source:HGNC Symbol;Acc:HGNC:37260]	-0.210726	0.00028384	0.00746435
LRRC32	protein_coding	leucine rich repeat containing 32 [Source:HGNC Symbol;Acc:HGNC:4161]	0.253025	0.000284451	0.00746645
IGF2	protein_coding	insulin like growth factor 2 [Source:HGNC Symbol;Acc:HGNC:5466]	0.291107	0.000286436	0.00750451
ATN1	protein_coding	atrophin 1 [Source:HGNC Symbol;Acc:HGNC:3033]	0.165107	0.000288034	0.00751833
VWA5A	protein_coding	von Willebrand factor A domain containing 5A [Source:HGNC Symbol;Acc:HGNC:6658]	-0.323821	0.000287634	0.00751833
ATP6V1D	protein_coding	ATPase H+ transporting V1 subunit D [Source:HGNC Symbol;Acc:HGNC:13527]	-0.140968	0.000290667	0.00757297
LLPH	protein_coding	LLP homolog, long-term synaptic facilitation factor [Source:HGNC Symbol;Acc:HGNC:28229]	-0.185666	0.000291513	0.00758096
CC2D1A	protein_coding	coiled-coil and C2 domain containing 1A [Source:HGNC Symbol;Acc:HGNC:30237]	0.210924	0.000292072	0.00758145
CSNK1D	protein_coding	casein kinase 1 delta [Source:HGNC Symbol;Acc:HGNC:2452]	0.133422	0.000295711	0.00766176
TCP1	protein_coding	t-complex 1 [Source:HGNC Symbol;Acc:HGNC:11655]	-0.137435	0.000300895	0.0077817
SPECC1	protein_coding	sperm antigen with calponin homology and coiled-coil domains 1 [Source:HGNC Symbol;Acc:HGNC:30615]	0.218488	0.000305046	0.00787455
GVQW3	protein_coding	GVQW motif containing 3 [Source:HGNC Symbol;Acc:HGNC:51239]	0.463642	0.000309808	0.00798281
SLX4	protein_coding	SLX4 structure-specific endonuclease subunit [Source:HGNC Symbol;Acc:HGNC:23845]	0.195554	0.00031568	0.00811922
MRPL39	protein_coding	mitochondrial ribosomal protein L39 [Source:HGNC Symbol;Acc:HGNC:14027]	-0.221349	0.000316282	0.00811983
NPM1	protein_coding	nucleophosmin 1 [Source:HGNC Symbol;Acc:HGNC:7910]	-0.175307	0.00031894	0.00817314
JMJD1C	protein_coding	jumonji domain containing 1C [Source:HGNC Symbol;Acc:HGNC:12313]	-0.136094	0.000320468	0.00819732
CBFA2T2	protein_coding	CBFA2/RUNX1 partner transcriptional co-repressor 2 [Source:HGNC Symbol;Acc:HGNC:1536]	0.191923	0.000322207	0.00822682
SAFB2	protein_coding	scaffold attachment factor B2 [Source:HGNC Symbol;Acc:HGNC:21605]	0.187218	0.000323073	0.00823398
CYCS	protein_coding	cytochrome c, somatic [Source:HGNC Symbol;Acc:HGNC:19986]	-0.182493	0.000323853	0.0082389
HNRNPDL	protein_coding	heterogeneous nuclear ribonucleoprotein D like [Source:HGNC Symbol;Acc:HGNC:5037]	-0.144043	0.00032485	0.0082493
RHBDF1	protein_coding	rhomboid 5 homolog 1 [Source:HGNC Symbol;Acc:HGNC:20561]	0.220072	0.000330764	0.00838433
TRNP1	protein_coding	TMF1 regulated nuclear protein 1 [Source:HGNC Symbol;Acc:HGNC:34348]	-0.159988	0.000335102	0.00847898
S1PR2	protein_coding	sphingosine-1-phosphate receptor 2 [Source:HGNC Symbol;Acc:HGNC:3169]	0.23031	0.00033592	0.00848439
TJAP1	protein_coding	tight junction associated protein 1 [Source:HGNC Symbol;Acc:HGNC:17949]	0.205597	0.000337138	0.00849987
SH3PXD2B	protein_coding	SH3 and PX domains 2B [Source:HGNC Symbol;Acc:HGNC:29242]	0.145209	0.000338832	0.00851202
MARVELD1	protein_coding	MARVEL domain containing 1 [Source:HGNC Symbol;Acc:HGNC:28674]	0.133853	0.00033883	0.00851202
VWCE	protein_coding	von Willebrand factor C and EGF domains [Source:HGNC Symbol;Acc:HGNC:26487]	0.543728	0.000341713	0.00853306
CASTOR2	protein_coding	cytosolic arginine sensor for mTORC1 subunit 2 [Source:HGNC Symbol;Acc:HGNC:37073]	0.253464	0.000345138	0.00853306
PHF8	protein_coding	PHD finger protein 8 [Source:HGNC Symbol;Acc:HGNC:20672]	0.200552	0.000342242	0.00853306
CUX1	protein_coding	cut like homeobox 1 [Source:HGNC Symbol;Acc:HGNC:2557]	0.151181	0.000340401	0.00853306
ADAM9	protein_coding	ADAM metallopeptidase domain 9 [Source:HGNC Symbol;Acc:HGNC:216]	-0.117958	0.000344584	0.00853306
SF3B6	protein_coding	splicing factor 3b subunit 6 [Source:HGNC Symbol;Acc:HGNC:30096]	-0.141734	0.000344553	0.00853306
ZNF654	protein_coding	zinc finger protein 654 [Source:HGNC Symbol;Acc:HGNC:25612]	-0.17607	0.000344915	0.00853306
DARS1	protein_coding	aspartyl-tRNA synthetase 1 [Source:HGNC Symbol;Acc:HGNC:2678]	-0.17953	0.000342406	0.00853306
PUM3	protein_coding	pumilio RNA binding family member 3 [Source:HGNC Symbol;Acc:HGNC:29676]	-0.22437	0.000343972	0.00853306
ANXA1	protein_coding	annexin A1 [Source:HGNC Symbol;Acc:HGNC:533]	-0.146122	0.000346616	0.00855453
CDC25B	protein_coding	cell division cycle 25B [Source:HGNC Symbol;Acc:HGNC:1726]	0.214178	0.000347826	0.00856934
TMEM9B-AS1	lncRNA	TMEM9B antisense RNA 1 [Source:HGNC Symbol;Acc:HGNC:19230]	0.519627	0.000350199	0.00861098
PCDHGB5	protein_coding	protocadherin gamma subfamily B, 5 [Source:HGNC Symbol;Acc:HGNC:8712]	0.180301	0.000351356	0.00861098
HNRNPA1	protein_coding	heterogeneous nuclear ribonucleoprotein A1 [Source:HGNC Symbol;Acc:HGNC:5031]	-0.194216	0.000351327	0.00861098
TOP2B	protein_coding	DNA topoisomerase II beta [Source:HGNC Symbol;Acc:HGNC:11990]	-0.181049	0.000356283	0.00871653
RPL24	protein_coding	ribosomal protein L24 [Source:HGNC Symbol;Acc:HGNC:10325]	-0.147416	0.000357797	0.00872316
PGM2	protein_coding	phosphoglucomutase 2 [Source:HGNC Symbol;Acc:HGNC:8906]	-0.156262	0.000357557	0.00872316
NPTXR	protein_coding	neuronal pentraxin receptor [Source:HGNC Symbol;Acc:HGNC:7954]	0.3291	0.000360467	0.00874272
PNPLA2	protein_coding	patatin like phospholipase domain containing 2 [Source:HGNC Symbol;Acc:HGNC:30802]	0.160184	0.000360414	0.00874272
PHF12	protein_coding	PHD finger protein 12 [Source:HGNC Symbol;Acc:HGNC:20816]	0.156136	0.000360438	0.00874272
FAR1	protein_coding	fatty acyl-CoA reductase 1 [Source:HGNC Symbol;Acc:HGNC:26222]	-0.152803	0.000363356	0.00879761
TMEM161B	protein_coding	transmembrane protein 161B [Source:HGNC Symbol;Acc:HGNC:28483]	-0.23385	0.000364715	0.0088153
ROMO1	protein_coding	reactive oxygen species modulator 1 [Source:HGNC Symbol;Acc:HGNC:16185]	-0.164469	0.000365662	0.00882301
NDUFAF8	protein_coding	NADH:ubiquinone oxidoreductase complex assembly factor 8 [Source:HGNC Symbol;Acc:HGNC:33551]	-0.291855	0.000370067	0.00891399
TUBA1B	protein_coding	tubulin alpha 1b [Source:HGNC Symbol;Acc:HGNC:18809]	-0.201993	0.000372199	0.00894999
BMF	protein_coding	Bcl2 modifying factor [Source:HGNC Symbol;Acc:HGNC:24132]	0.432591	0.00037491	0.00895385
CACNB3	protein_coding	calcium voltage-gated channel auxiliary subunit beta 3 [Source:HGNC Symbol;Acc:HGNC:1403]	0.230807	0.000373331	0.00895385
ZNF703	protein_coding	zinc finger protein 703 [Source:HGNC Symbol;Acc:HGNC:25883]	0.166851	0.000374281	0.00895385
AGO2	protein_coding	argonaute RISC catalytic component 2 [Source:HGNC Symbol;Acc:HGNC:3263]	0.161147	0.000374855	0.00895385
TRERF1	protein_coding	transcriptional regulating factor 1 [Source:HGNC Symbol;Acc:HGNC:18273]	0.17776	0.000378715	0.00902937
TUBA1C	protein_coding	tubulin alpha 1c [Source:HGNC Symbol;Acc:HGNC:20768]	-0.185492	0.000383856	0.00913642
ZBTB17	protein_coding	zinc finger and BTB domain containing 17 [Source:HGNC Symbol;Acc:HGNC:12936]	0.186907	0.000385752	0.00916042
MDM1	protein_coding	Mdm1 nuclear protein [Source:HGNC Symbol;Acc:HGNC:29917]	-0.260146	0.000386169	0.00916042
CCT6A	protein_coding	chaperonin containing TCP1 subunit 6A [Source:HGNC Symbol;Acc:HGNC:1620]	-0.144746	0.000388991	0.00921181
ZNF584-DT	lncRNA	ZNF584 divergent transcript [Source:HGNC Symbol;Acc:HGNC:56027]	0.350568	0.000390384	0.00921952
PPP1R12B	protein_coding	protein phosphatase 1 regulatory subunit 12B [Source:HGNC Symbol;Acc:HGNC:7619]	0.234765	0.000391943	0.00921952
FLNA	protein_coding	filamin A [Source:HGNC Symbol;Acc:HGNC:3754]	0.145973	0.000391644	0.00921952
MRPS21	protein_coding	mitochondrial ribosomal protein S21 [Source:HGNC Symbol;Acc:HGNC:14046]	-0.177375	0.000391096	0.00921952
IRAG1	protein_coding	inositol 1,4,5-triphosphate receptor associated 1 [Source:HGNC Symbol;Acc:HGNC:7237]	0.209084	0.000394964	0.00927505
GALNS	protein_coding	galactosamine (N-acetyl)-6-sulfatase [Source:HGNC Symbol;Acc:HGNC:4122]	0.176888	0.000396267	0.00929012
GARIN1A	protein_coding	golgi associated RAB2 interactor 1A [Source:HGNC Symbol;Acc:HGNC:27998]	0.704521	0.000402395	0.00941156
ADAMTS2	protein_coding	ADAM metallopeptidase with thrombospondin type 1 motif 2 [Source:HGNC Symbol;Acc:HGNC:218]	0.168954	0.000403458	0.00941156
ASAP1	protein_coding	ArfGAP with SH3 domain, ankyrin repeat and PH domain 1 [Source:HGNC Symbol;Acc:HGNC:2720]	0.126951	0.00040287	0.00941156
CBLB	protein_coding	Cbl proto-oncogene B [Source:HGNC Symbol;Acc:HGNC:1542]	0.196521	0.00040931	0.00953223
ABCC5	protein_coding	ATP binding cassette subfamily C member 5 [Source:HGNC Symbol;Acc:HGNC:56]	0.252988	0.00041205	0.00958016
UFL1	protein_coding	UFM1 specific ligase 1 [Source:HGNC Symbol;Acc:HGNC:23039]	-0.169423	0.000421176	0.00974395
MRTO4	protein_coding	MRT4 homolog, ribosome maturation factor [Source:HGNC Symbol;Acc:HGNC:18477]	-0.225214	0.000421164	0.00974395
SALL2	protein_coding	spalt like transcription factor 2 [Source:HGNC Symbol;Acc:HGNC:10526]	0.230483	0.000423361	0.00977051
COL1A1	protein_coding	collagen type I alpha 1 chain [Source:HGNC Symbol;Acc:HGNC:2197]	0.21461	0.000424832	0.00977051
SELENON	protein_coding	selenoprotein N [Source:HGNC Symbol;Acc:HGNC:15999]	0.150832	0.000424791	0.00977051
ENO1	protein_coding	enolase 1 [Source:HGNC Symbol;Acc:HGNC:3350]	-0.165569	0.000425107	0.00977051
BMP1	protein_coding	bone morphogenetic protein 1 [Source:HGNC Symbol;Acc:HGNC:1067]	0.185018	0.000425881	0.0097723
PHF13	protein_coding	PHD finger protein 13 [Source:HGNC Symbol;Acc:HGNC:22983]	0.168113	0.000428085	0.00977902
SLC2A3	protein_coding	solute carrier family 2 member 3 [Source:HGNC Symbol;Acc:HGNC:11007]	-0.185378	0.000428263	0.00977902
KRBA2	protein_coding	KRAB-A domain containing 2 [Source:HGNC Symbol;Acc:HGNC:26989]	0.35607	0.000436296	0.00994628
ATXN2L	protein_coding	ataxin 2 like [Source:HGNC Symbol;Acc:HGNC:31326]	0.146497	0.00043828	0.00996417
ZNF518A	protein_coding	zinc finger protein 518A [Source:HGNC Symbol;Acc:HGNC:29009]	-0.220853	0.0004385	0.00996417
DNAJB4	protein_coding	DnaJ heat shock protein family (Hsp40) member B4 [Source:HGNC Symbol;Acc:HGNC:14886]	-0.189195	0.000441552	0.0100173
ATP5F1E	protein_coding	ATP synthase F1 subunit epsilon [Source:HGNC Symbol;Acc:HGNC:838]	-0.127327	0.000444036	0.0100574
CHCHD7	protein_coding	coiled-coil-helix-coiled-coil-helix domain containing 7 [Source:HGNC Symbol;Acc:HGNC:28314]	-0.166035	0.000446466	0.0100962
ADH5	protein_coding	alcohol dehydrogenase 5 (class III), chi polypeptide [Source:HGNC Symbol;Acc:HGNC:253]	-0.12943	0.00044755	0.0101044
ANKRD13D	protein_coding	ankyrin repeat domain 13D [Source:HGNC Symbol;Acc:HGNC:27880]	0.209916	0.000448568	0.0101111
INPPL1	protein_coding	inositol polyphosphate phosphatase like 1 [Source:HGNC Symbol;Acc:HGNC:6080]	0.145715	0.000458204	0.0103118
BAHCC1	protein_coding	BAH domain and coiled-coil containing 1 [Source:HGNC Symbol;Acc:HGNC:29279]	0.16448	0.000460498	0.0103303
HHIP	protein_coding	hedgehog interacting protein [Source:HGNC Symbol;Acc:HGNC:14866]	-0.195862	0.000461836	0.0103438
PGAM1	protein_coding	phosphoglycerate mutase 1 [Source:HGNC Symbol;Acc:HGNC:8888]	-0.155574	0.000463735	0.0103698
SDK2	protein_coding	sidekick cell adhesion molecule 2 [Source:HGNC Symbol;Acc:HGNC:19308]	0.397039	0.000467652	0.0104408
ATP13A2	protein_coding	ATPase cation transporting 13A2 [Source:HGNC Symbol;Acc:HGNC:30213]	0.163948	0.000473198	0.0105478
GMIP	protein_coding	GEM interacting protein [Source:HGNC Symbol;Acc:HGNC:24852]	0.230409	0.000477447	0.0106257
IMPA2	protein_coding	inositol monophosphatase 2 [Source:HGNC Symbol;Acc:HGNC:6051]	0.471475	0.000489096	0.0108677
MKNK1	protein_coding	MAPK interacting serine/threonine kinase 1 [Source:HGNC Symbol;Acc:HGNC:7110]	0.187875	0.000491974	0.0109144
KRBA1	protein_coding	KRAB-A domain containing 1 [Source:HGNC Symbol;Acc:HGNC:22228]	0.209594	0.000495755	0.0109809
ASIC1	protein_coding	acid sensing ion channel subunit 1 [Source:HGNC Symbol;Acc:HGNC:100]	0.317816	0.000499674	0.0110225
HPCAL1	protein_coding	hippocalcin like 1 [Source:HGNC Symbol;Acc:HGNC:5145]	0.266721	0.000498779	0.0110225
ATP6AP1	protein_coding	ATPase H+ transporting accessory protein 1 [Source:HGNC Symbol;Acc:HGNC:868]	0.142029	0.000500567	0.0110225
HYCC1	protein_coding	hyccin PI4KA lipid kinase complex subunit 1 [Source:HGNC Symbol;Acc:HGNC:24587]	-0.148245	0.0005014	0.0110225
GAS2L3	protein_coding	growth arrest specific 2 like 3 [Source:HGNC Symbol;Acc:HGNC:27475]	-0.27934	0.000501558	0.0110225
MTHFR	protein_coding	methylenetetrahydrofolate reductase [Source:HGNC Symbol;Acc:HGNC:7436]	0.250397	0.000505727	0.0110278
RIPOR1	protein_coding	RHO family interacting cell polarization regulator 1 [Source:HGNC Symbol;Acc:HGNC:25836]	0.151332	0.00050381	0.0110278
GNB4	protein_coding	G protein subunit beta 4 [Source:HGNC Symbol;Acc:HGNC:20731]	-0.15468	0.000505705	0.0110278
ATP5F1D	protein_coding	ATP synthase F1 subunit delta [Source:HGNC Symbol;Acc:HGNC:837]	-0.164876	0.000503573	0.0110278
EMP1	protein_coding	epithelial membrane protein 1 [Source:HGNC Symbol;Acc:HGNC:3333]	-0.19425	0.00050489	0.0110278
VPS50	protein_coding	VPS50 subunit of EARP/GARPII complex [Source:HGNC Symbol;Acc:HGNC:25956]	-0.200098	0.000510034	0.0111045
IQSEC2	protein_coding	IQ motif and Sec7 domain ArfGEF 2 [Source:HGNC Symbol;Acc:HGNC:29059]	0.226236	0.000513401	0.0111433
YLPM1	protein_coding	YLP motif containing 1 [Source:HGNC Symbol;Acc:HGNC:17798]	0.136047	0.000513205	0.0111433
TRRAP	protein_coding	transformation/transcription domain associated protein [Source:HGNC Symbol;Acc:HGNC:12347]	0.138628	0.000519188	0.0112515
SLC12A9	protein_coding	solute carrier family 12 member 9 [Source:HGNC Symbol;Acc:HGNC:17435]	0.176854	0.000520086	0.0112536
CENPW	protein_coding	centromere protein W [Source:HGNC Symbol;Acc:HGNC:21488]	-0.295717	0.000523597	0.0113121
DCLK2	protein_coding	doublecortin like kinase 2 [Source:HGNC Symbol;Acc:HGNC:19002]	0.238324	0.000525719	0.0113231
MAN2A2	protein_coding	mannosidase alpha class 2A member 2 [Source:HGNC Symbol;Acc:HGNC:6825]	0.231827	0.000525069	0.0113231
SSB	protein_coding	small RNA binding exonuclease protection factor La [Source:HGNC Symbol;Acc:HGNC:11316]	-0.137537	0.000528411	0.0113637
ZNF75A	protein_coding	zinc finger protein 75A [Source:HGNC Symbol;Acc:HGNC:13146]	0.194075	0.00053003	0.0113811
RPL35	protein_coding	ribosomal protein L35 [Source:HGNC Symbol;Acc:HGNC:10344]	-0.167492	0.000532356	0.0114135
SNRPB2	protein_coding	small nuclear ribonucleoprotein polypeptide B2 [Source:HGNC Symbol;Acc:HGNC:11155]	-0.158621	0.000534252	0.0114367
SLC25A29	protein_coding	solute carrier family 25 member 29 [Source:HGNC Symbol;Acc:HGNC:20116]	0.242848	0.000536153	0.0114425
PCSK7	protein_coding	proprotein convertase subtilisin/kexin type 7 [Source:HGNC Symbol;Acc:HGNC:8748]	0.190484	0.000535767	0.0114425
RMRP	ribozyme	RNA component of mitochondrial RNA processing endoribonuclease [Source:HGNC Symbol;Acc:HGNC:10031]	0.637665	0.000537874	0.0114618
PCM1	protein_coding	pericentriolar material 1 [Source:HGNC Symbol;Acc:HGNC:8727]	-0.131657	0.000542444	0.0115417
TMSB4X	protein_coding	thymosin beta 4 X-linked [Source:HGNC Symbol;Acc:HGNC:11881]	-0.123288	0.000544717	0.0115726
CDH6	protein_coding	cadherin 6 [Source:HGNC Symbol;Acc:HGNC:1765]	0.208531	0.000549008	0.0116461
NUMA1	protein_coding	nuclear mitotic apparatus protein 1 [Source:HGNC Symbol;Acc:HGNC:8059]	0.129216	0.00055248	0.0117021
HNRNPH3	protein_coding	heterogeneous nuclear ribonucleoprotein H3 [Source:HGNC Symbol;Acc:HGNC:5043]	-0.14046	0.000554359	0.0117066
RPL17P6	processed_pseudogene	ribosomal protein L17 pseudogene 6 [Source:HGNC Symbol;Acc:HGNC:36520]	-0.412788	0.000554077	0.0117066
THBD	protein_coding	thrombomodulin [Source:HGNC Symbol;Acc:HGNC:11784]	-0.300451	0.000555929	0.0117221
ARNT	protein_coding	aryl hydrocarbon receptor nuclear translocator [Source:HGNC Symbol;Acc:HGNC:700]	0.145357	0.000558353	0.011738
CLIC1	protein_coding	chloride intracellular channel 1 [Source:HGNC Symbol;Acc:HGNC:2062]	-0.141524	0.000557816	0.011738
SLC25A25-AS1	lncRNA	SLC25A25 antisense RNA 1 [Source:HGNC Symbol;Acc:HGNC:27844]	0.570116	0.000561378	0.011772
AAMDC	protein_coding	adipogenesis associated Mth938 domain containing [Source:HGNC Symbol;Acc:HGNC:30205]	-0.196612	0.000561649	0.011772
FAM117B	protein_coding	family with sequence similarity 117 member B [Source:HGNC Symbol;Acc:HGNC:14440]	0.284156	0.000566601	0.0118581
SNHG15	lncRNA	small nucleolar RNA host gene 15 [Source:HGNC Symbol;Acc:HGNC:27797]	-0.253832	0.000569451	0.0119
CEBPB	protein_coding	CCAAT enhancer binding protein beta [Source:HGNC Symbol;Acc:HGNC:1834]	-0.247805	0.000579063	0.0120829
PROSER3	protein_coding	proline and serine rich 3 [Source:HGNC Symbol;Acc:HGNC:25204]	0.208124	0.000584098	0.0121699
GTF3C3	protein_coding	general transcription factor IIIC subunit 3 [Source:HGNC Symbol;Acc:HGNC:4666]	-0.168693	0.000587364	0.0122198
IQCE	protein_coding	IQ motif containing E [Source:HGNC Symbol;Acc:HGNC:29171]	0.178087	0.000590626	0.0122695
TXN	protein_coding	thioredoxin [Source:HGNC Symbol;Acc:HGNC:12435]	-0.127905	0.000594094	0.0123233
RPL37A	protein_coding	ribosomal protein L37a [Source:HGNC Symbol;Acc:HGNC:10348]	-0.14514	0.000596584	0.0123567
C6orf136	protein_coding	chromosome 6 open reading frame 136 [Source:HGNC Symbol;Acc:HGNC:21301]	0.2394	0.000599435	0.0123942
TMEM63A	protein_coding	transmembrane protein 63A [Source:HGNC Symbol;Acc:HGNC:29118]	0.228413	0.000602311	0.0123942
CUL9	protein_coding	cullin 9 [Source:HGNC Symbol;Acc:HGNC:15982]	0.205779	0.000605931	0.0123942
RPS7	protein_coding	ribosomal protein S7 [Source:HGNC Symbol;Acc:HGNC:10440]	-0.127693	0.000604649	0.0123942
TFRC	protein_coding	transferrin receptor [Source:HGNC Symbol;Acc:HGNC:11763]	-0.139706	0.000604402	0.0123942
SMS	protein_coding	spermine synthase [Source:HGNC Symbol;Acc:HGNC:11123]	-0.166598	0.000601477	0.0123942
AKAP12	protein_coding	A-kinase anchoring protein 12 [Source:HGNC Symbol;Acc:HGNC:370]	-0.16981	0.000603908	0.0123942
TMA16	protein_coding	translation machinery associated 16 homolog [Source:HGNC Symbol;Acc:HGNC:25638]	-0.175234	0.000606338	0.0123942
HDGFL3	protein_coding	HDGF like 3 [Source:HGNC Symbol;Acc:HGNC:24937]	-0.151617	0.000607382	0.0123975
POGZ	protein_coding	pogo transposable element derived with ZNF domain [Source:HGNC Symbol;Acc:HGNC:18801]	0.143429	0.000610605	0.0124452
FOXK2	protein_coding	forkhead box K2 [Source:HGNC Symbol;Acc:HGNC:6036]	0.159864	0.000617037	0.0125384
CCT3	protein_coding	chaperonin containing TCP1 subunit 3 [Source:HGNC Symbol;Acc:HGNC:1616]	-0.117547	0.000617856	0.0125384
RRM1	protein_coding	ribonucleotide reductase catalytic subunit M1 [Source:HGNC Symbol;Acc:HGNC:10451]	-0.214214	0.000616542	0.0125384
ZYX	protein_coding	zyxin [Source:HGNC Symbol;Acc:HGNC:13200]	0.129821	0.00061904	0.0125443
RMND1	protein_coding	required for meiotic nuclear division 1 homolog [Source:HGNC Symbol;Acc:HGNC:21176]	-0.219461	0.000622194	0.01259
MAP2K7	protein_coding	mitogen-activated protein kinase kinase 7 [Source:HGNC Symbol;Acc:HGNC:6847]	0.172808	0.000623179	0.0125918
TSHZ1	protein_coding	teashirt zinc finger homeobox 1 [Source:HGNC Symbol;Acc:HGNC:10669]	0.190171	0.000624819	0.0126068
FAM131B	protein_coding	family with sequence similarity 131 member B [Source:HGNC Symbol;Acc:HGNC:22202]	0.342477	0.000625735	0.0126072
TSPAN5	protein_coding	tetraspanin 5 [Source:HGNC Symbol;Acc:HGNC:17753]	-0.134257	0.000631146	0.0126909
NCAPG	protein_coding	non-SMC condensin I complex subunit G [Source:HGNC Symbol;Acc:HGNC:24304]	-0.260354	0.000631697	0.0126909
LPCAT4	protein_coding	lysophosphatidylcholine acyltransferase 4 [Source:HGNC Symbol;Acc:HGNC:30059]	0.186712	0.000633663	0.012694
HES4	protein_coding	hes family bHLH transcription factor 4 [Source:HGNC Symbol;Acc:HGNC:24149]	-0.464481	0.00063278	0.012694
FBXL12	protein_coding	F-box and leucine rich repeat protein 12 [Source:HGNC Symbol;Acc:HGNC:13611]	0.190227	0.000636722	0.012701
LSM3	protein_coding	LSM3 homolog, U6 small nuclear RNA and mRNA degradation associated [Source:HGNC Symbol;Acc:HGNC:17874]	-0.179694	0.0006363	0.012701
CD93	protein_coding	CD93 molecule [Source:HGNC Symbol;Acc:HGNC:15855]	-0.187482	0.000635048	0.012701
WDR43	protein_coding	WD repeat domain 43 [Source:HGNC Symbol;Acc:HGNC:28945]	-0.197754	0.00064161	0.0127803
NOMO1	protein_coding	NODAL modulator 1 [Source:HGNC Symbol;Acc:HGNC:30060]	0.163942	0.000646416	0.0128578
RPL23A	protein_coding	ribosomal protein L23a [Source:HGNC Symbol;Acc:HGNC:10317]	-0.126001	0.000648522	0.0128815
ZMYM3	protein_coding	zinc finger MYM-type containing 3 [Source:HGNC Symbol;Acc:HGNC:13054]	0.172188	0.000651358	0.0129195
AMPD2	protein_coding	adenosine monophosphate deaminase 2 [Source:HGNC Symbol;Acc:HGNC:469]	0.197781	0.000660456	0.0130447
NIFK	protein_coding	nucleolar protein interacting with the FHA domain of MKI67 [Source:HGNC Symbol;Acc:HGNC:17838]	-0.216334	0.00065898	0.0130447
MTURN	protein_coding	maturin, neural progenitor differentiation regulator homolog [Source:HGNC Symbol;Acc:HGNC:25457]	-0.286139	0.000659818	0.0130447
USP15	protein_coding	ubiquitin specific peptidase 15 [Source:HGNC Symbol;Acc:HGNC:12613]	-0.155149	0.00066258	0.0130683
RAI14	protein_coding	retinoic acid induced 14 [Source:HGNC Symbol;Acc:HGNC:14873]	-0.125345	0.000666914	0.0131353
LINC-PINT	lncRNA	long intergenic non-protein coding RNA, p53 induced transcript [Source:HGNC Symbol;Acc:HGNC:26885]	0.378841	0.000672829	0.0131782
INPP5E	protein_coding	inositol polyphosphate-5-phosphatase E [Source:HGNC Symbol;Acc:HGNC:21474]	0.174003	0.00067144	0.0131782
UBE4B	protein_coding	ubiquitination factor E4B [Source:HGNC Symbol;Acc:HGNC:12500]	0.132915	0.000672273	0.0131782
CWC15	protein_coding	CWC15 spliceosome associated protein homolog [Source:HGNC Symbol;Acc:HGNC:26939]	-0.152945	0.000672847	0.0131782
IGF2R	protein_coding	insulin like growth factor 2 receptor [Source:HGNC Symbol;Acc:HGNC:5467]	0.138297	0.000674796	0.013198
PTCD3	protein_coding	pentatricopeptide repeat domain 3 [Source:HGNC Symbol;Acc:HGNC:24717]	-0.144419	0.000678852	0.0132589
ITGA7	protein_coding	integrin subunit alpha 7 [Source:HGNC Symbol;Acc:HGNC:6143]	0.233917	0.000684715	0.0133548
ECSIT	protein_coding	ECSIT signaling integrator [Source:HGNC Symbol;Acc:HGNC:29548]	0.198663	0.000687892	0.0133982
GLI2	protein_coding	GLI family zinc finger 2 [Source:HGNC Symbol;Acc:HGNC:4318]	0.204547	0.000691368	0.0134472
WIZ	protein_coding	WIZ zinc finger [Source:HGNC Symbol;Acc:HGNC:30917]	0.155202	0.000693954	0.0134788
PPP6R1	protein_coding	protein phosphatase 6 regulatory subunit 1 [Source:HGNC Symbol;Acc:HGNC:29195]	0.136573	0.000700749	0.0135703
TBCA	protein_coding	tubulin folding cofactor A [Source:HGNC Symbol;Acc:HGNC:11579]	-0.139303	0.000700034	0.0135703
GTPBP4	protein_coding	GTP binding protein 4 [Source:HGNC Symbol;Acc:HGNC:21535]	-0.158442	0.000702334	0.0135703
NUDT15	protein_coding	nudix hydrolase 15 [Source:HGNC Symbol;Acc:HGNC:23063]	-0.181694	0.00070253	0.0135703
FXR1	protein_coding	FMR1 autosomal homolog 1 [Source:HGNC Symbol;Acc:HGNC:4023]	-0.127047	0.000709157	0.013642
RPS6	protein_coding	ribosomal protein S6 [Source:HGNC Symbol;Acc:HGNC:10429]	-0.143072	0.000708472	0.013642
SEMA3A	protein_coding	semaphorin 3A [Source:HGNC Symbol;Acc:HGNC:10723]	-0.168058	0.00070839	0.013642
MXD4	protein_coding	MAX dimerization protein 4 [Source:HGNC Symbol;Acc:HGNC:13906]	0.132947	0.000722081	0.013831
PRKCSH	protein_coding	protein kinase C substrate 80K-H [Source:HGNC Symbol;Acc:HGNC:9411]	0.126174	0.000721589	0.013831
KDELR1	protein_coding	KDEL endoplasmic reticulum protein retention receptor 1 [Source:HGNC Symbol;Acc:HGNC:6304]	0.125325	0.000722918	0.013831
RAB8B	protein_coding	RAB8B, member RAS oncogene family [Source:HGNC Symbol;Acc:HGNC:30273]	-0.15824	0.000722307	0.013831
SEZ6L2	protein_coding	seizure related 6 homolog like 2 [Source:HGNC Symbol;Acc:HGNC:30844]	0.310208	0.000732073	0.0139871
SPCS1	protein_coding	signal peptidase complex subunit 1 [Source:HGNC Symbol;Acc:HGNC:23401]	-0.138557	0.000733173	0.0139891
DIP2C	protein_coding	disco interacting protein 2 homolog C [Source:HGNC Symbol;Acc:HGNC:29150]	0.137219	0.000740595	0.0141115
CLPTM1	protein_coding	CLPTM1 regulator of GABA type A receptor forward trafficking [Source:HGNC Symbol;Acc:HGNC:2087]	0.153712	0.000741802	0.0141153
LAPTM4B	protein_coding	lysosomal protein transmembrane 4 beta [Source:HGNC Symbol;Acc:HGNC:13646]	-0.124488	0.000749888	0.0142393
ANKRD26	protein_coding	ankyrin repeat domain containing 26 [Source:HGNC Symbol;Acc:HGNC:29186]	-0.183367	0.000750343	0.0142393
ZNF789	protein_coding	zinc finger protein 789 [Source:HGNC Symbol;Acc:HGNC:27801]	0.336336	0.000753607	0.0142435
UAP1	protein_coding	UDP-N-acetylglucosamine pyrophosphorylase 1 [Source:HGNC Symbol;Acc:HGNC:12457]	-0.227847	0.000753497	0.0142435
FAM162A	protein_coding	family with sequence similarity 162 member A [Source:HGNC Symbol;Acc:HGNC:17865]	-0.287918	0.000753356	0.0142435
THAP12	protein_coding	THAP domain containing 12 [Source:HGNC Symbol;Acc:HGNC:9440]	-0.172591	0.000756317	0.0142629
BLOC1S4	protein_coding	biogenesis of lysosomal organelles complex 1 subunit 4 [Source:HGNC Symbol;Acc:HGNC:24206]	-0.240855	0.000756666	0.0142629
RAN	protein_coding	RAN, member RAS oncogene family [Source:HGNC Symbol;Acc:HGNC:9846]	-0.148923	0.000762444	0.0143526
CENPE	protein_coding	centromere protein E [Source:HGNC Symbol;Acc:HGNC:1856]	-0.53658	0.000765404	0.014389
PCDHGA11	protein_coding	protocadherin gamma subfamily A, 11 [Source:HGNC Symbol;Acc:HGNC:8698]	0.249119	0.000766892	0.014397
SOCS1	protein_coding	suppressor of cytokine signaling 1 [Source:HGNC Symbol;Acc:HGNC:19383]	-0.358073	0.00076788	0.014397
DOCK5	protein_coding	dedicator of cytokinesis 5 [Source:HGNC Symbol;Acc:HGNC:23476]	0.176398	0.000770733	0.0144312
FOXJ2	protein_coding	forkhead box J2 [Source:HGNC Symbol;Acc:HGNC:24818]	0.194406	0.000774998	0.0144532
CASP3	protein_coding	caspase 3 [Source:HGNC Symbol;Acc:HGNC:1504]	-0.168435	0.00077497	0.0144532
SYVN1	protein_coding	synoviolin 1 [Source:HGNC Symbol;Acc:HGNC:20738]	0.161408	0.000780034	0.0145279
CLIC4	protein_coding	chloride intracellular channel 4 [Source:HGNC Symbol;Acc:HGNC:13518]	-0.121556	0.000788201	0.0146567
RAP1B	protein_coding	RAP1B, member of RAS oncogene family [Source:HGNC Symbol;Acc:HGNC:9857]	-0.136533	0.00078904	0.0146567
CCNI	protein_coding	cyclin I [Source:HGNC Symbol;Acc:HGNC:1595]	0.13227	0.000790283	0.0146604
NBN	protein_coding	nibrin [Source:HGNC Symbol;Acc:HGNC:7652]	-0.134648	0.000792922	0.0146706
VPS9D1	protein_coding	VPS9 domain containing 1 [Source:HGNC Symbol;Acc:HGNC:13526]	0.23462	0.00079802	0.0147455
NPLOC4	protein_coding	NPL4 homolog, ubiquitin recognition factor [Source:HGNC Symbol;Acc:HGNC:18261]	0.12072	0.000804572	0.014847
WDTC1	protein_coding	WD and tetratricopeptide repeats 1 [Source:HGNC Symbol;Acc:HGNC:29175]	0.161284	0.000815818	0.0150348
PEAK1	protein_coding	pseudopodium enriched atypical kinase 1 [Source:HGNC Symbol;Acc:HGNC:29431]	0.165264	0.000826866	0.015217
EPHB4	protein_coding	EPH receptor B4 [Source:HGNC Symbol;Acc:HGNC:3395]	0.14321	0.000827871	0.015217
H2AZ1	protein_coding	H2A.Z variant histone 1 [Source:HGNC Symbol;Acc:HGNC:4741]	-0.176911	0.000829053	0.0152188
SLC36A1	protein_coding	solute carrier family 36 member 1 [Source:HGNC Symbol;Acc:HGNC:18761]	0.163616	0.000831948	0.015237
HMGXB3	protein_coding	HMG-box containing 3 [Source:HGNC Symbol;Acc:HGNC:28982]	0.125428	0.000832387	0.015237
TBC1D23	protein_coding	TBC1 domain family member 23 [Source:HGNC Symbol;Acc:HGNC:25622]	-0.137719	0.000833302	0.015237
KCTD13	protein_coding	potassium channel tetramerization domain containing 13 [Source:HGNC Symbol;Acc:HGNC:22234]	0.199516	0.000834841	0.0152454
ZFYVE1	protein_coding	zinc finger FYVE-type containing 1 [Source:HGNC Symbol;Acc:HGNC:13180]	0.146805	0.000845029	0.0153714
MYO1C	protein_coding	myosin IC [Source:HGNC Symbol;Acc:HGNC:7597]	0.124254	0.000844018	0.0153714
NIT2	protein_coding	nitrilase family member 2 [Source:HGNC Symbol;Acc:HGNC:29878]	-0.184184	0.000843542	0.0153714
ABCD1	protein_coding	ATP binding cassette subfamily D member 1 [Source:HGNC Symbol;Acc:HGNC:61]	0.208264	0.000849646	0.0154245
PCTP	protein_coding	phosphatidylcholine transfer protein [Source:HGNC Symbol;Acc:HGNC:8752]	-0.235337	0.000850146	0.0154245
LTN1	protein_coding	listerin E3 ubiquitin protein ligase 1 [Source:HGNC Symbol;Acc:HGNC:13082]	-0.156411	0.000856025	0.0155112
TRAF5	protein_coding	TNF receptor associated factor 5 [Source:HGNC Symbol;Acc:HGNC:12035]	0.206742	0.000857435	0.0155167
FEM1C	protein_coding	fem-1 homolog C [Source:HGNC Symbol;Acc:HGNC:16933]	-0.15207	0.000862614	0.0155903
PLXNA3	protein_coding	plexin A3 [Source:HGNC Symbol;Acc:HGNC:9101]	0.178683	0.000865747	0.0156268
WDR3	protein_coding	WD repeat domain 3 [Source:HGNC Symbol;Acc:HGNC:12755]	-0.191079	0.000868099	0.0156492
TRAF7	protein_coding	TNF receptor associated factor 7 [Source:HGNC Symbol;Acc:HGNC:20456]	0.125498	0.000875785	0.0157675
THBS3	protein_coding	thrombospondin 3 [Source:HGNC Symbol;Acc:HGNC:11787]	0.184427	0.000880051	0.0158038
ABCE1	protein_coding	ATP binding cassette subfamily E member 1 [Source:HGNC Symbol;Acc:HGNC:69]	-0.162918	0.000879619	0.0158038
BTBD19	protein_coding	BTB domain containing 19 [Source:HGNC Symbol;Acc:HGNC:27145]	0.221754	0.000883462	0.0158448
ECI2	protein_coding	enoyl-CoA delta isomerase 2 [Source:HGNC Symbol;Acc:HGNC:14601]	-0.131882	0.000885022	0.0158525
KLHL21	protein_coding	kelch like family member 21 [Source:HGNC Symbol;Acc:HGNC:29041]	0.152336	0.000892639	0.0159686
NBPF15	protein_coding	NBPF member 15 [Source:HGNC Symbol;Acc:HGNC:28791]	0.184534	0.00089507	0.0159714
SRSF11	protein_coding	serine and arginine rich splicing factor 11 [Source:HGNC Symbol;Acc:HGNC:10782]	-0.143004	0.000894764	0.0159714
SDCBP2-AS1	lncRNA	SDCBP2 antisense RNA 1 [Source:HGNC Symbol;Acc:HGNC:44314]	0.43825	0.000902459	0.0160828
MAD2L1	protein_coding	mitotic arrest deficient 2 like 1 [Source:HGNC Symbol;Acc:HGNC:6763]	-0.261004	0.000904699	0.0161023
SARM1	protein_coding	sterile alpha and TIR motif containing 1 [Source:HGNC Symbol;Acc:HGNC:17074]	0.235143	0.000907099	0.0161245
GOT1-DT	lncRNA	GOT1 divergent transcript [Source:HGNC Symbol;Acc:HGNC:55848]	0.768695	0.000911973	0.016152
MIAT	lncRNA	myocardial infarction associated transcript [Source:HGNC Symbol;Acc:HGNC:33425]	2.02445	0.000910192	0.016152
NOC3L	protein_coding	NOC3 like DNA replication regulator [Source:HGNC Symbol;Acc:HGNC:24034]	-0.163834	0.000912093	0.016152
TWSG1	protein_coding	twisted gastrulation BMP signaling modulator 1 [Source:HGNC Symbol;Acc:HGNC:12429]	0.178199	0.000927226	0.0162636
MCAM	protein_coding	melanoma cell adhesion molecule [Source:HGNC Symbol;Acc:HGNC:6934]	0.174659	0.000925177	0.0162636
CABIN1	protein_coding	calcineurin binding protein 1 [Source:HGNC Symbol;Acc:HGNC:24187]	0.163786	0.000929976	0.0162636
ACTB	protein_coding	actin beta [Source:HGNC Symbol;Acc:HGNC:132]	0.124071	0.000928906	0.0162636
SLC16A1	protein_coding	solute carrier family 16 member 1 [Source:HGNC Symbol;Acc:HGNC:10922]	-0.135124	0.000921263	0.0162636
BDP1	protein_coding	B double prime 1, subunit of RNA polymerase III transcription initiation factor IIIB [Source:HGNC Symbol;Acc:HGNC:13652]	-0.150192	0.000928279	0.0162636
GOLGA4	protein_coding	golgin A4 [Source:HGNC Symbol;Acc:HGNC:4427]	-0.179273	0.000928821	0.0162636
PLK4	protein_coding	polo like kinase 4 [Source:HGNC Symbol;Acc:HGNC:11397]	-0.314859	0.000923281	0.0162636
MIR222HG	lncRNA	miR222/221 cluster host gene [Source:HGNC Symbol;Acc:HGNC:49555]	-0.39308	0.000928401	0.0162636
RAI1	protein_coding	retinoic acid induced 1 [Source:HGNC Symbol;Acc:HGNC:9834]	0.158917	0.000936096	0.0163502
DDR1	protein_coding	discoidin domain receptor tyrosine kinase 1 [Source:HGNC Symbol;Acc:HGNC:2730]	0.200454	0.000937343	0.0163517
PLXNA2	protein_coding	plexin A2 [Source:HGNC Symbol;Acc:HGNC:9100]	0.182898	0.000940241	0.0163819
ANXA2	protein_coding	annexin A2 [Source:HGNC Symbol;Acc:HGNC:537]	-0.134415	0.000949699	0.0165057
SNRPD1	protein_coding	small nuclear ribonucleoprotein D1 polypeptide [Source:HGNC Symbol;Acc:HGNC:11158]	-0.181646	0.000948603	0.0165057
CCT8	protein_coding	chaperonin containing TCP1 subunit 8 [Source:HGNC Symbol;Acc:HGNC:1623]	-0.139557	0.000950909	0.0165063
ALAS1	protein_coding	5'-aminolevulinate synthase 1 [Source:HGNC Symbol;Acc:HGNC:396]	0.149488	0.000958025	0.0166039
AP2A2	protein_coding	adaptor related protein complex 2 subunit alpha 2 [Source:HGNC Symbol;Acc:HGNC:562]	0.130359	0.000959644	0.0166039
RPS24	protein_coding	ribosomal protein S24 [Source:HGNC Symbol;Acc:HGNC:10411]	-0.148083	0.00096008	0.0166039
MINDY1	protein_coding	MINDY lysine 48 deubiquitinase 1 [Source:HGNC Symbol;Acc:HGNC:25648]	0.292131	0.000964885	0.0166665
SNX19	protein_coding	sorting nexin 19 [Source:HGNC Symbol;Acc:HGNC:21532]	0.124088	0.000966216	0.016669
CDV3	protein_coding	CDV3 homolog [Source:HGNC Symbol;Acc:HGNC:26928]	-0.15835	0.000971286	0.016716
KDM3A	protein_coding	lysine demethylase 3A [Source:HGNC Symbol;Acc:HGNC:20815]	-0.19033	0.000971318	0.016716
RAVER1	protein_coding	ribonucleoprotein, PTB binding 1 [Source:HGNC Symbol;Acc:HGNC:30296]	0.165375	0.000976271	0.0167806
DYRK1B	protein_coding	dual specificity tyrosine phosphorylation regulated kinase 1B [Source:HGNC Symbol;Acc:HGNC:3092]	0.194038	0.000980347	0.0168301
SLC25A44	protein_coding	solute carrier family 25 member 44 [Source:HGNC Symbol;Acc:HGNC:29036]	0.147834	0.000985667	0.0169008
OLFML2A	protein_coding	olfactomedin like 2A [Source:HGNC Symbol;Acc:HGNC:27270]	0.26561	0.000991852	0.0169861
DOCK7	protein_coding	dedicator of cytokinesis 7 [Source:HGNC Symbol;Acc:HGNC:19190]	-0.14465	0.000993305	0.0169902
EFHD1	protein_coding	EF-hand domain family member D1 [Source:HGNC Symbol;Acc:HGNC:29556]	0.327261	0.000997065	0.0170338
HERC2	protein_coding	HECT and RLD domain containing E3 ubiquitin protein ligase 2 [Source:HGNC Symbol;Acc:HGNC:4868]	0.140272	0.000999629	0.0170569
RELA	protein_coding	RELA proto-oncogene, NF-kB subunit [Source:HGNC Symbol;Acc:HGNC:9955]	0.135001	0.00100252	0.0170855
TUBB6	protein_coding	tubulin beta 6 class V [Source:HGNC Symbol;Acc:HGNC:20776]	-0.144889	0.00100688	0.0171389
NUP58	protein_coding	nucleoporin 58 [Source:HGNC Symbol;Acc:HGNC:20261]	-0.137975	0.00101185	0.0172027
SLC25A45	protein_coding	solute carrier family 25 member 45 [Source:HGNC Symbol;Acc:HGNC:27442]	0.398226	0.00101344	0.0172089
RPS21	protein_coding	ribosomal protein S21 [Source:HGNC Symbol;Acc:HGNC:10409]	-0.15151	0.00101755	0.0172578
FRY	protein_coding	FRY microtubule binding protein [Source:HGNC Symbol;Acc:HGNC:20367]	0.297052	0.00101881	0.0172583
CMKLR1	protein_coding	chemerin chemokine-like receptor 1 [Source:HGNC Symbol;Acc:HGNC:2121]	-0.267333	0.00103162	0.0174543
C3orf62	protein_coding	chromosome 3 open reading frame 62 [Source:HGNC Symbol;Acc:HGNC:24771]	0.370773	0.00103426	0.0174779
RPL35A	protein_coding	ribosomal protein L35a [Source:HGNC Symbol;Acc:HGNC:10345]	-0.139427	0.00104142	0.0175777
MIB2	protein_coding	MIB E3 ubiquitin protein ligase 2 [Source:HGNC Symbol;Acc:HGNC:30577]	0.188775	0.00104778	0.0176638
C1orf21	protein_coding	chromosome 1 open reading frame 21 [Source:HGNC Symbol;Acc:HGNC:15494]	0.359751	0.00106487	0.0178911
CHPF2	protein_coding	chondroitin polymerizing factor 2 [Source:HGNC Symbol;Acc:HGNC:29270]	0.160593	0.00106566	0.0178911
PPARD	protein_coding	peroxisome proliferator activated receptor delta [Source:HGNC Symbol;Acc:HGNC:9235]	0.136026	0.00106636	0.0178911
PUS7L	protein_coding	pseudouridine synthase 7 like [Source:HGNC Symbol;Acc:HGNC:25276]	-0.201115	0.00106633	0.0178911
DHX34	protein_coding	DExH-box helicase 34 [Source:HGNC Symbol;Acc:HGNC:16719]	0.191266	0.00107484	0.0179488
ETV6	protein_coding	ETS variant transcription factor 6 [Source:HGNC Symbol;Acc:HGNC:3495]	0.155812	0.00107491	0.0179488
VARS1	protein_coding	valyl-tRNA synthetase 1 [Source:HGNC Symbol;Acc:HGNC:12651]	0.120915	0.00107115	0.0179488
PYROXD1	protein_coding	pyridine nucleotide-disulphide oxidoreductase domain 1 [Source:HGNC Symbol;Acc:HGNC:26162]	-0.175467	0.00107474	0.0179488
LTBR	protein_coding	lymphotoxin beta receptor [Source:HGNC Symbol;Acc:HGNC:6718]	0.158241	0.00108193	0.0180308
DTD1	protein_coding	D-aminoacyl-tRNA deacylase 1 [Source:HGNC Symbol;Acc:HGNC:16219]	-0.22905	0.00108239	0.0180308
SEL1L	protein_coding	SEL1L adaptor subunit of ERAD E3 ubiquitin ligase [Source:HGNC Symbol;Acc:HGNC:10717]	-0.12305	0.0010864	0.0180763
CENPV	protein_coding	centromere protein V [Source:HGNC Symbol;Acc:HGNC:29920]	-0.243994	0.00108787	0.0180792
CLIP3	protein_coding	CAP-Gly domain containing linker protein 3 [Source:HGNC Symbol;Acc:HGNC:24314]	0.180627	0.00109454	0.0181686
JAKMIP3	protein_coding	Janus kinase and microtubule interacting protein 3 [Source:HGNC Symbol;Acc:HGNC:23523]	0.848791	0.00109751	0.018175
MIOS	protein_coding	meiosis regulator for oocyte development [Source:HGNC Symbol;Acc:HGNC:21905]	-0.166232	0.00109672	0.018175
DMD	protein_coding	dystrophin [Source:HGNC Symbol;Acc:HGNC:2928]	-0.150057	0.00110039	0.0182012
ZNF384	protein_coding	zinc finger protein 384 [Source:HGNC Symbol;Acc:HGNC:11955]	0.162332	0.00110588	0.0182705
NDUFS5	protein_coding	NADH:ubiquinone oxidoreductase subunit S5 [Source:HGNC Symbol;Acc:HGNC:7712]	-0.128796	0.0011082	0.0182872
ZNF512B	protein_coding	zinc finger protein 512B [Source:HGNC Symbol;Acc:HGNC:29212]	0.161133	0.00110992	0.0182942
SELENOO	protein_coding	selenoprotein O [Source:HGNC Symbol;Acc:HGNC:30395]	0.228958	0.00112097	0.018347
RAD54L2	protein_coding	RAD54 like 2 [Source:HGNC Symbol;Acc:HGNC:29123]	0.166461	0.0011183	0.018347
PHLDB1	protein_coding	pleckstrin homology like domain family B member 1 [Source:HGNC Symbol;Acc:HGNC:23697]	0.147789	0.00111459	0.018347
STRIP1	protein_coding	striatin interacting protein 1 [Source:HGNC Symbol;Acc:HGNC:25916]	0.147121	0.00111977	0.018347
RPS27A	protein_coding	ribosomal protein S27a [Source:HGNC Symbol;Acc:HGNC:10417]	-0.145016	0.00111731	0.018347
DDX21	protein_coding	DExD-box helicase 21 [Source:HGNC Symbol;Acc:HGNC:2744]	-0.156673	0.00111911	0.018347
GNL2	protein_coding	G protein nucleolar 2 [Source:HGNC Symbol;Acc:HGNC:29925]	-0.144747	0.00112525	0.0183956
EIF4A2	protein_coding	eukaryotic translation initiation factor 4A2 [Source:HGNC Symbol;Acc:HGNC:3284]	-0.110474	0.00113024	0.0184558
LTO1	protein_coding	LTO1 maturation factor of ABCE1 [Source:HGNC Symbol;Acc:HGNC:17589]	0.232639	0.00113809	0.0185194
MGRN1	protein_coding	mahogunin ring finger 1 [Source:HGNC Symbol;Acc:HGNC:20254]	0.141567	0.00113728	0.0185194
EDF1	protein_coding	endothelial differentiation related factor 1 [Source:HGNC Symbol;Acc:HGNC:3164]	-0.138283	0.00113658	0.0185194
ZC3H12A	protein_coding	zinc finger CCCH-type containing 12A [Source:HGNC Symbol;Acc:HGNC:26259]	0.259679	0.00114113	0.0185474
PEG10	protein_coding	paternally expressed 10 [Source:HGNC Symbol;Acc:HGNC:14005]	0.165761	0.00115283	0.0187159
RPS20	protein_coding	ribosomal protein S20 [Source:HGNC Symbol;Acc:HGNC:10405]	-0.13097	0.00115837	0.0187806
CDK7	protein_coding	cyclin dependent kinase 7 [Source:HGNC Symbol;Acc:HGNC:1778]	-0.148618	0.0011595	0.0187806
ARHGAP1	protein_coding	Rho GTPase activating protein 1 [Source:HGNC Symbol;Acc:HGNC:673]	0.160428	0.00116377	0.0188281
MCOLN1	protein_coding	mucolipin TRP cation channel 1 [Source:HGNC Symbol;Acc:HGNC:13356]	0.239501	0.00117084	0.018834
SLC27A4	protein_coding	solute carrier family 27 member 4 [Source:HGNC Symbol;Acc:HGNC:10998]	0.168423	0.00116903	0.018834
SCCPDH	protein_coding	saccharopine dehydrogenase (putative) [Source:HGNC Symbol;Acc:HGNC:24275]	-0.141502	0.00116786	0.018834
ALYREF	protein_coding	Aly/REF export factor [Source:HGNC Symbol;Acc:HGNC:19071]	-0.168056	0.00116991	0.018834
CEBPG	protein_coding	CCAAT enhancer binding protein gamma [Source:HGNC Symbol;Acc:HGNC:1837]	-0.22253	0.00116681	0.018834
POM121	protein_coding	POM121 transmembrane nucleoporin [Source:HGNC Symbol;Acc:HGNC:19702]	0.138567	0.00117417	0.0188659
FNBP1	protein_coding	formin binding protein 1 [Source:HGNC Symbol;Acc:HGNC:17069]	0.159257	0.00117617	0.0188766
CASKIN2	protein_coding	CASK interacting protein 2 [Source:HGNC Symbol;Acc:HGNC:18200]	0.196491	0.00118042	0.0189232
SRCAP	protein_coding	Snf2 related CREBBP activator protein [Source:HGNC Symbol;Acc:HGNC:16974]	0.238629	0.00118205	0.0189277
TP73-AS1	transcribed_unitary_pseudogene	TP73 antisense RNA 1 [Source:HGNC Symbol;Acc:HGNC:29052]	0.18273	0.00118581	0.0189663
POFUT2	protein_coding	protein O-fucosyltransferase 2 [Source:HGNC Symbol;Acc:HGNC:14683]	0.142058	0.00118931	0.0189841
HNRNPA3	protein_coding	heterogeneous nuclear ribonucleoprotein A3 [Source:HGNC Symbol;Acc:HGNC:24941]	-0.147069	0.00118963	0.0189841
GNAI3	protein_coding	G protein subunit alpha i3 [Source:HGNC Symbol;Acc:HGNC:4387]	-0.14744	0.00119223	0.0190039
PRDM2	protein_coding	PR/SET domain 2 [Source:HGNC Symbol;Acc:HGNC:9347]	0.175702	0.00120016	0.0191087
TKT	protein_coding	transketolase [Source:HGNC Symbol;Acc:HGNC:11834]	0.167866	0.00120303	0.0191327
FHIP2B	protein_coding	FHF complex subunit HOOK interacting protein 2B [Source:HGNC Symbol;Acc:HGNC:16492]	0.164899	0.00120708	0.0191753
EBNA1BP2	protein_coding	EBNA1 binding protein 2 [Source:HGNC Symbol;Acc:HGNC:15531]	-0.169482	0.00120844	0.0191753
PDE4DIPP2	transcribed_unprocessed_pseudogene	PDE4DIP pseudogene 2 [Source:HGNC Symbol;Acc:HGNC:55081]	0.337296	0.00121572	0.0192691
KIAA0513	protein_coding	KIAA0513 [Source:HGNC Symbol;Acc:HGNC:29058]	0.185085	0.00122537	0.0194001
WNT2B	protein_coding	Wnt family member 2B [Source:HGNC Symbol;Acc:HGNC:12781]	0.214111	0.00122745	0.0194112
ERI2	protein_coding	ERI1 exoribonuclease family member 2 [Source:HGNC Symbol;Acc:HGNC:30541]	-0.249567	0.00123027	0.0194339
L3HYPDH	protein_coding	trans-L-3-hydroxyproline dehydratase [Source:HGNC Symbol;Acc:HGNC:20488]	-0.137829	0.00123325	0.019459
ANP32A	protein_coding	acidic nuclear phosphoprotein 32 family member A [Source:HGNC Symbol;Acc:HGNC:13233]	-0.131862	0.00123576	0.0194768
DCAF7	protein_coding	DDB1 and CUL4 associated factor 7 [Source:HGNC Symbol;Acc:HGNC:30915]	0.124353	0.00123993	0.0195067
DLGAP5	protein_coding	DLG associated protein 5 [Source:HGNC Symbol;Acc:HGNC:16864]	-0.266342	0.00124044	0.0195067
PHF21A	protein_coding	PHD finger protein 21A [Source:HGNC Symbol;Acc:HGNC:24156]	0.161784	0.00124234	0.0195147
OLMALINC	lncRNA	oligodendrocyte maturation-associated long intergenic non-coding RNA [Source:HGNC Symbol;Acc:HGNC:28060]	0.373275	0.00124964	0.0195635
PSD4	protein_coding	pleckstrin and Sec7 domain containing 4 [Source:HGNC Symbol;Acc:HGNC:19096]	0.279745	0.00124692	0.0195635
CHST12	protein_coding	carbohydrate sulfotransferase 12 [Source:HGNC Symbol;Acc:HGNC:17423]	0.21731	0.00125038	0.0195635
FUBP1	protein_coding	far upstream element binding protein 1 [Source:HGNC Symbol;Acc:HGNC:4004]	-0.16645	0.00125102	0.0195635
TTC28	protein_coding	tetratricopeptide repeat domain 28 [Source:HGNC Symbol;Acc:HGNC:29179]	0.188623	0.00125351	0.0195745
USP54	protein_coding	ubiquitin specific peptidase 54 [Source:HGNC Symbol;Acc:HGNC:23513]	0.185173	0.00125451	0.0195745
ZNF503	protein_coding	zinc finger protein 503 [Source:HGNC Symbol;Acc:HGNC:23589]	0.243437	0.0012655	0.0197242
CAMK2G	protein_coding	calcium/calmodulin dependent protein kinase II gamma [Source:HGNC Symbol;Acc:HGNC:1463]	0.208109	0.0012704	0.0197566
RPL27A	protein_coding	ribosomal protein L27a [Source:HGNC Symbol;Acc:HGNC:10329]	-0.118854	0.00127002	0.0197566
PRDM11	protein_coding	PR/SET domain 11 [Source:HGNC Symbol;Acc:HGNC:13996]	0.221245	0.00128048	0.0198913
UHRF2	protein_coding	ubiquitin like with PHD and ring finger domains 2 [Source:HGNC Symbol;Acc:HGNC:12557]	-0.158371	0.00128264	0.0199029
TTC7A	protein_coding	tetratricopeptide repeat domain 7A [Source:HGNC Symbol;Acc:HGNC:19750]	0.141533	0.00129737	0.0200978
SIPA1L1	protein_coding	signal induced proliferation associated 1 like 1 [Source:HGNC Symbol;Acc:HGNC:20284]	0.13985	0.00129883	0.0200978
ERO1A	protein_coding	endoplasmic reticulum oxidoreductase 1 alpha [Source:HGNC Symbol;Acc:HGNC:13280]	-0.180372	0.00129949	0.0200978
BCAS2	protein_coding	BCAS2 pre-mRNA processing factor [Source:HGNC Symbol;Acc:HGNC:975]	-0.168223	0.00130219	0.0201174
AGPS	protein_coding	alkylglycerone phosphate synthase [Source:HGNC Symbol;Acc:HGNC:327]	-0.123505	0.00130598	0.0201379
TEK	protein_coding	TEK receptor tyrosine kinase [Source:HGNC Symbol;Acc:HGNC:11724]	-0.380168	0.00130639	0.0201379
SLC25A23	protein_coding	solute carrier family 25 member 23 [Source:HGNC Symbol;Acc:HGNC:19375]	0.176421	0.00131059	0.0201805
B3GNT5	protein_coding	UDP-GlcNAc:betaGal beta-1,3-N-acetylglucosaminyltransferase 5 [Source:HGNC Symbol;Acc:HGNC:15684]	-0.18709	0.00131376	0.0202071
OSGIN2	protein_coding	oxidative stress induced growth inhibitor family member 2 [Source:HGNC Symbol;Acc:HGNC:1355]	-0.138817	0.00133608	0.0205279
UQCRH	protein_coding	ubiquinol-cytochrome c reductase hinge protein [Source:HGNC Symbol;Acc:HGNC:12590]	-0.124433	0.00133913	0.0205299
DDX18	protein_coding	DEAD-box helicase 18 [Source:HGNC Symbol;Acc:HGNC:2741]	-0.176123	0.00133905	0.0205299
SUFU	protein_coding	SUFU negative regulator of hedgehog signaling [Source:HGNC Symbol;Acc:HGNC:16466]	0.150513	0.00134133	0.0205413
SBF1	protein_coding	SET binding factor 1 [Source:HGNC Symbol;Acc:HGNC:10542]	0.154426	0.00134608	0.0205691
GIT2	protein_coding	GIT ArfGAP 2 [Source:HGNC Symbol;Acc:HGNC:4273]	0.128282	0.00134516	0.0205691
CDC5L	protein_coding	cell division cycle 5 like [Source:HGNC Symbol;Acc:HGNC:1743]	-0.137092	0.00135121	0.0205954
TUBB	protein_coding	tubulin beta class I [Source:HGNC Symbol;Acc:HGNC:20778]	-0.151188	0.00134975	0.0205954
VCAM1	protein_coding	vascular cell adhesion molecule 1 [Source:HGNC Symbol;Acc:HGNC:12663]	-0.27563	0.00135367	0.0205954
FOXL2NB	protein_coding	FOXL2 neighbor [Source:HGNC Symbol;Acc:HGNC:34428]	0.3314	0.00135716	0.0206262
HMBOX1	protein_coding	homeobox containing 1 [Source:HGNC Symbol;Acc:HGNC:26137]	0.207061	0.00135889	0.0206302
STARD9	protein_coding	StAR related lipid transfer domain containing 9 [Source:HGNC Symbol;Acc:HGNC:19162]	0.187948	0.00136653	0.0207237
CEP83	protein_coding	centrosomal protein 83 [Source:HGNC Symbol;Acc:HGNC:17966]	-0.255363	0.00136835	0.020729
BDH1	protein_coding	3-hydroxybutyrate dehydrogenase 1 [Source:HGNC Symbol;Acc:HGNC:1027]	0.284871	0.00137354	0.0207487
SF3A2	protein_coding	splicing factor 3a subunit 2 [Source:HGNC Symbol;Acc:HGNC:10766]	0.155595	0.00137409	0.0207487
CCDC88A	protein_coding	coiled-coil domain containing 88A [Source:HGNC Symbol;Acc:HGNC:25523]	-0.154195	0.00137352	0.0207487
TRIM3	protein_coding	tripartite motif containing 3 [Source:HGNC Symbol;Acc:HGNC:10064]	0.171945	0.00137772	0.0207812
MAU2	protein_coding	MAU2 sister chromatid cohesion factor [Source:HGNC Symbol;Acc:HGNC:29140]	0.150126	0.00138073	0.0208043
U2SURP	protein_coding	U2 snRNP associated SURP domain containing [Source:HGNC Symbol;Acc:HGNC:30855]	-0.166159	0.00139276	0.020963
NISCH	protein_coding	nischarin [Source:HGNC Symbol;Acc:HGNC:18006]	0.149468	0.00140611	0.0210981
TPCN1	protein_coding	two pore segment channel 1 [Source:HGNC Symbol;Acc:HGNC:18182]	0.134501	0.00140505	0.0210981
KIF15	protein_coding	kinesin family member 15 [Source:HGNC Symbol;Acc:HGNC:17273]	-0.314299	0.00140624	0.0210981
DHCR24	protein_coding	24-dehydrocholesterol reductase [Source:HGNC Symbol;Acc:HGNC:2859]	0.171901	0.00142049	0.0212564
ARPC2	protein_coding	actin related protein 2/3 complex subunit 2 [Source:HGNC Symbol;Acc:HGNC:705]	-0.0979913	0.00142436	0.0212564
HNRNPC	protein_coding	heterogeneous nuclear ribonucleoprotein C [Source:HGNC Symbol;Acc:HGNC:5035]	-0.129121	0.00142072	0.0212564
PNISR	protein_coding	PNN interacting serine and arginine rich protein [Source:HGNC Symbol;Acc:HGNC:21222]	-0.129509	0.00142364	0.0212564
SRSF5	protein_coding	serine and arginine rich splicing factor 5 [Source:HGNC Symbol;Acc:HGNC:10787]	-0.132195	0.00142171	0.0212564
WWC3	protein_coding	WWC family member 3 [Source:HGNC Symbol;Acc:HGNC:29237]	0.142469	0.00143048	0.0213251
H3-3B	protein_coding	H3.3 histone B [Source:HGNC Symbol;Acc:HGNC:4765]	-0.17448	0.00144729	0.0215527
C2orf27A	lncRNA	chromosome 2 open reading frame 27A [Source:HGNC Symbol;Acc:HGNC:25077]	-0.20224	0.00145925	0.021708
PLEKHA6	protein_coding	pleckstrin homology domain containing A6 [Source:HGNC Symbol;Acc:HGNC:17053]	0.345729	0.00146472	0.0217432
DERA	protein_coding	deoxyribose-phosphate aldolase [Source:HGNC Symbol;Acc:HGNC:24269]	-0.193593	0.0014646	0.0217432
MRPL15	protein_coding	mitochondrial ribosomal protein L15 [Source:HGNC Symbol;Acc:HGNC:14054]	-0.173365	0.00146652	0.0217469
NARS1	protein_coding	asparaginyl-tRNA synthetase 1 [Source:HGNC Symbol;Acc:HGNC:7643]	-0.128181	0.00146812	0.0217478
NFRKB	protein_coding	nuclear factor related to kappaB binding protein [Source:HGNC Symbol;Acc:HGNC:7802]	0.161458	0.00147365	0.0218065
RPL21	protein_coding	ribosomal protein L21 [Source:HGNC Symbol;Acc:HGNC:10313]	-0.146126	0.0014802	0.0218805
GTF2IRD2B	protein_coding	GTF2I repeat domain containing 2B [Source:HGNC Symbol;Acc:HGNC:33125]	-0.419508	0.00148433	0.0219185
SMPD4BP	transcribed_processed_pseudogene	sphingomyelin phosphodiesterase 4B, pseudogene [Source:HGNC Symbol;Acc:HGNC:24761]	0.234428	0.00148673	0.0219308
SNX29	protein_coding	sorting nexin 29 [Source:HGNC Symbol;Acc:HGNC:30542]	0.183278	0.00148988	0.0219542
PRRT2	protein_coding	proline rich transmembrane protein 2 [Source:HGNC Symbol;Acc:HGNC:30500]	0.516012	0.00149828	0.0219763
PRKY	transcribed_unitary_pseudogene	protein kinase Y-linked (pseudogene) [Source:HGNC Symbol;Acc:HGNC:9444]	0.268977	0.00150546	0.0219763
ALS2	protein_coding	alsin Rho guanine nucleotide exchange factor ALS2 [Source:HGNC Symbol;Acc:HGNC:443]	-0.120139	0.00149364	0.0219763
GAPDH	protein_coding	glyceraldehyde-3-phosphate dehydrogenase [Source:HGNC Symbol;Acc:HGNC:4141]	-0.126253	0.00150519	0.0219763
PPIG	protein_coding	peptidylprolyl isomerase G [Source:HGNC Symbol;Acc:HGNC:14650]	-0.146234	0.00149572	0.0219763
HARS2	protein_coding	histidyl-tRNA synthetase 2, mitochondrial [Source:HGNC Symbol;Acc:HGNC:4817]	-0.149681	0.00149912	0.0219763
NRIP1	protein_coding	nuclear receptor interacting protein 1 [Source:HGNC Symbol;Acc:HGNC:8001]	-0.152196	0.00150262	0.0219763
TIE1	protein_coding	tyrosine kinase with immunoglobulin like and EGF like domains 1 [Source:HGNC Symbol;Acc:HGNC:11809]	-0.31793	0.0015003	0.0219763
FAM200A	protein_coding	family with sequence similarity 200 member A [Source:HGNC Symbol;Acc:HGNC:25401]	-0.241562	0.00150747	0.0219828
UVSSA	protein_coding	UV stimulated scaffold protein A [Source:HGNC Symbol;Acc:HGNC:29304]	0.19049	0.00151632	0.022089
CEMIP	protein_coding	cell migration inducing hyaluronidase 1 [Source:HGNC Symbol;Acc:HGNC:29213]	0.214871	0.00153146	0.0222863
TMEM120B	protein_coding	transmembrane protein 120B [Source:HGNC Symbol;Acc:HGNC:32008]	0.151887	0.00153343	0.0222919
TRIM66	protein_coding	tripartite motif containing 66 [Source:HGNC Symbol;Acc:HGNC:29005]	0.286819	0.0015395	0.0223338
TUBA1A	protein_coding	tubulin alpha 1a [Source:HGNC Symbol;Acc:HGNC:20766]	-0.192462	0.00153849	0.0223338
COPS9	protein_coding	COP9 signalosome subunit 9 [Source:HGNC Symbol;Acc:HGNC:21314]	-0.151814	0.00154457	0.0223843
SEMA6C	protein_coding	semaphorin 6C [Source:HGNC Symbol;Acc:HGNC:10740]	0.238231	0.00155047	0.0224058
PREPL	protein_coding	prolyl endopeptidase like [Source:HGNC Symbol;Acc:HGNC:30228]	-0.120792	0.00155084	0.0224058
DYNLL1	protein_coding	dynein light chain LC8-type 1 [Source:HGNC Symbol;Acc:HGNC:15476]	-0.122103	0.00154886	0.0224058
PEDS1	protein_coding	plasmanylethanolamine desaturase 1 [Source:HGNC Symbol;Acc:HGNC:16735]	0.163007	0.00155439	0.022434
GIPC3	protein_coding	GIPC PDZ domain containing family member 3 [Source:HGNC Symbol;Acc:HGNC:18183]	0.347217	0.00155726	0.0224524
NR1D1	protein_coding	nuclear receptor subfamily 1 group D member 1 [Source:HGNC Symbol;Acc:HGNC:7962]	0.305925	0.00157081	0.0225965
RNPEPL1	protein_coding	arginyl aminopeptidase like 1 [Source:HGNC Symbol;Acc:HGNC:10079]	0.167967	0.00157208	0.0225965
TSEN15	protein_coding	tRNA splicing endonuclease subunit 15 [Source:HGNC Symbol;Acc:HGNC:16791]	-0.185454	0.00156898	0.0225965
ATRX	protein_coding	ATRX chromatin remodeler [Source:HGNC Symbol;Acc:HGNC:886]	-0.144775	0.00157583	0.0226272
ZNF462	protein_coding	zinc finger protein 462 [Source:HGNC Symbol;Acc:HGNC:21684]	0.18538	0.00157803	0.0226357
TACSTD2	protein_coding	tumor associated calcium signal transducer 2 [Source:HGNC Symbol;Acc:HGNC:11530]	0.807365	0.00158266	0.0226789
PRPF8	protein_coding	pre-mRNA processing factor 8 [Source:HGNC Symbol;Acc:HGNC:17340]	0.102124	0.00158504	0.0226899
MBD1	protein_coding	methyl-CpG binding domain protein 1 [Source:HGNC Symbol;Acc:HGNC:6916]	0.119718	0.00159046	0.0227211
CA12	protein_coding	carbonic anhydrase 12 [Source:HGNC Symbol;Acc:HGNC:1371]	-0.172389	0.00159038	0.0227211
OSGIN1	protein_coding	oxidative stress induced growth inhibitor 1 [Source:HGNC Symbol;Acc:HGNC:30093]	0.345204	0.00160647	0.0228105
MAPRE3	protein_coding	microtubule associated protein RP/EB family member 3 [Source:HGNC Symbol;Acc:HGNC:6892]	0.218709	0.00160613	0.0228105
FZD8	protein_coding	frizzled class receptor 8 [Source:HGNC Symbol;Acc:HGNC:4046]	0.189923	0.00160608	0.0228105
NOL11	protein_coding	nucleolar protein 11 [Source:HGNC Symbol;Acc:HGNC:24557]	-0.161576	0.0016026	0.0228105
FAM114A2	protein_coding	family with sequence similarity 114 member A2 [Source:HGNC Symbol;Acc:HGNC:1333]	-0.174016	0.00160298	0.0228105
TNFAIP8	protein_coding	TNF alpha induced protein 8 [Source:HGNC Symbol;Acc:HGNC:17260]	-0.202347	0.00160014	0.0228105
SSH2	protein_coding	slingshot protein phosphatase 2 [Source:HGNC Symbol;Acc:HGNC:30580]	0.141035	0.00160877	0.0228202
EEA1	protein_coding	early endosome antigen 1 [Source:HGNC Symbol;Acc:HGNC:3185]	-0.127972	0.00161445	0.0228775
MAPK6	protein_coding	mitogen-activated protein kinase 6 [Source:HGNC Symbol;Acc:HGNC:6879]	-0.15083	0.00163497	0.0230984
ANLN	protein_coding	anillin, actin binding protein [Source:HGNC Symbol;Acc:HGNC:14082]	-0.224857	0.0016343	0.0230984
KIF20B	protein_coding	kinesin family member 20B [Source:HGNC Symbol;Acc:HGNC:7212]	-0.290882	0.00164527	0.0232207
BACE1-AS	lncRNA	BACE1 antisense RNA [Source:HGNC Symbol;Acc:HGNC:37125]	0.296527	0.00164791	0.0232345
HSPA9	protein_coding	heat shock protein family A (Hsp70) member 9 [Source:HGNC Symbol;Acc:HGNC:5244]	-0.12372	0.00165788	0.0233517
MAP3K7	protein_coding	mitogen-activated protein kinase kinase kinase 7 [Source:HGNC Symbol;Acc:HGNC:6859]	-0.114763	0.00166472	0.0234245
MRPL3	protein_coding	mitochondrial ribosomal protein L3 [Source:HGNC Symbol;Acc:HGNC:10379]	-0.139439	0.00167571	0.0235555
SLC17A9	protein_coding	solute carrier family 17 member 9 [Source:HGNC Symbol;Acc:HGNC:16192]	0.269963	0.00167941	0.023584
NHSL2	protein_coding	NHS like 2 [Source:HGNC Symbol;Acc:HGNC:33737]	0.150648	0.00168589	0.0236351
METAP2	protein_coding	methionyl aminopeptidase 2 [Source:HGNC Symbol;Acc:HGNC:16672]	-0.134376	0.00168642	0.0236351
NINL	protein_coding	ninein like [Source:HGNC Symbol;Acc:HGNC:29163]	0.220536	0.0016963	0.0237232
PARP6	protein_coding	poly(ADP-ribose) polymerase family member 6 [Source:HGNC Symbol;Acc:HGNC:26921]	0.199169	0.0017044	0.0237232
KANK2	protein_coding	KN motif and ankyrin repeat domains 2 [Source:HGNC Symbol;Acc:HGNC:29300]	0.142001	0.00170004	0.0237232
SIN3B	protein_coding	SIN3 transcription regulator family member B [Source:HGNC Symbol;Acc:HGNC:19354]	0.136614	0.00170056	0.0237232
NANS	protein_coding	N-acetylneuraminate synthase [Source:HGNC Symbol;Acc:HGNC:19237]	-0.139158	0.00170622	0.0237232
DNM3OS	lncRNA	DNM3 opposite strand/antisense RNA [Source:HGNC Symbol;Acc:HGNC:41228]	-0.190458	0.0017059	0.0237232
DUS2	protein_coding	dihydrouridine synthase 2 [Source:HGNC Symbol;Acc:HGNC:26014]	-0.193646	0.00169805	0.0237232
ARSL	protein_coding	arylsulfatase L [Source:HGNC Symbol;Acc:HGNC:719]	-0.259319	0.001706	0.0237232
GUSBP11	lncRNA	GUSB pseudogene 11 [Source:HGNC Symbol;Acc:HGNC:42325]	0.393093	0.00172768	0.0239978
BZW1	protein_coding	basic leucine zipper and W2 domains 1 [Source:HGNC Symbol;Acc:HGNC:18380]	-0.150416	0.00173127	0.0240239
MBTPS1	protein_coding	membrane bound transcription factor peptidase, site 1 [Source:HGNC Symbol;Acc:HGNC:15456]	0.116189	0.00173684	0.0240775
UTP14A	protein_coding	UTP14A small subunit processome component [Source:HGNC Symbol;Acc:HGNC:10665]	-0.192964	0.00174216	0.0241273
HNRNPA2B1	protein_coding	heterogeneous nuclear ribonucleoprotein A2/B1 [Source:HGNC Symbol;Acc:HGNC:5033]	-0.134501	0.00174522	0.024146
ZZEF1	protein_coding	zinc finger ZZ-type and EF-hand domain containing 1 [Source:HGNC Symbol;Acc:HGNC:29027]	0.127782	0.00176225	0.0243058
PNN	protein_coding	pinin, desmosome associated protein [Source:HGNC Symbol;Acc:HGNC:9162]	-0.119449	0.00176098	0.0243058
PDCD5	protein_coding	programmed cell death 5 [Source:HGNC Symbol;Acc:HGNC:8764]	-0.162078	0.00176275	0.0243058
ADGRE5	protein_coding	adhesion G protein-coupled receptor E5 [Source:HGNC Symbol;Acc:HGNC:1711]	0.187406	0.00177035	0.0243736
C7orf50	protein_coding	chromosome 7 open reading frame 50 [Source:HGNC Symbol;Acc:HGNC:22421]	-0.227658	0.00179081	0.0246311
NEO1	protein_coding	neogenin 1 [Source:HGNC Symbol;Acc:HGNC:7754]	0.226897	0.00179501	0.024644
FRRS1	protein_coding	ferric chelate reductase 1 [Source:HGNC Symbol;Acc:HGNC:27622]	-0.228104	0.00179526	0.024644
MAML1	protein_coding	mastermind like transcriptional coactivator 1 [Source:HGNC Symbol;Acc:HGNC:13632]	0.121291	0.0018044	0.0247453
KATNIP	protein_coding	katanin interacting protein [Source:HGNC Symbol;Acc:HGNC:29068]	0.15598	0.00180682	0.0247543
SGO2	protein_coding	shugoshin 2 [Source:HGNC Symbol;Acc:HGNC:30812]	-0.284836	0.00181225	0.0248046
ATP6V0A1	protein_coding	ATPase H+ transporting V0 subunit a1 [Source:HGNC Symbol;Acc:HGNC:865]	0.154235	0.00182419	0.0249437
BCL2L11	protein_coding	BCL2 like 11 [Source:HGNC Symbol;Acc:HGNC:994]	0.279264	0.00182621	0.0249469
CMSS1	protein_coding	cms1 ribosomal small subunit homolog [Source:HGNC Symbol;Acc:HGNC:28666]	-0.197729	0.00183276	0.0250121
NSMCE4A	protein_coding	NSE4 homolog A, SMC5-SMC6 complex component [Source:HGNC Symbol;Acc:HGNC:25935]	-0.19645	0.00184384	0.0251389
EEF1B2	protein_coding	eukaryotic translation elongation factor 1 beta 2 [Source:HGNC Symbol;Acc:HGNC:3208]	-0.128025	0.00185056	0.025192
RIMKLB	protein_coding	ribosomal modification protein rimK like family member B [Source:HGNC Symbol;Acc:HGNC:29228]	-0.262416	0.00185133	0.025192
OGDH	protein_coding	oxoglutarate dehydrogenase [Source:HGNC Symbol;Acc:HGNC:8124]	0.10843	0.00185861	0.0252667
ZBTB4	protein_coding	zinc finger and BTB domain containing 4 [Source:HGNC Symbol;Acc:HGNC:23847]	0.122175	0.001863	0.0253019
BTN2A3P	lncRNA	butyrophilin subfamily 2 member A3, pseudogene [Source:HGNC Symbol;Acc:HGNC:13229]	0.341253	0.00186902	0.0253591
NDUFS4	protein_coding	NADH:ubiquinone oxidoreductase subunit S4 [Source:HGNC Symbol;Acc:HGNC:7711]	-0.149804	0.00187087	0.0253597
SETX	protein_coding	senataxin [Source:HGNC Symbol;Acc:HGNC:445]	-0.112698	0.00187385	0.0253739
PWP1	protein_coding	PWP1 homolog, endonuclein [Source:HGNC Symbol;Acc:HGNC:17015]	-0.122985	0.00187554	0.0253739
NCL	protein_coding	nucleolin [Source:HGNC Symbol;Acc:HGNC:7667]	-0.143975	0.001888	0.025518
NRG1	protein_coding	neuregulin 1 [Source:HGNC Symbol;Acc:HGNC:7997]	0.188524	0.00189553	0.0255951
BNIP3L	protein_coding	BCL2 interacting protein 3 like [Source:HGNC Symbol;Acc:HGNC:1085]	-0.158279	0.0018983	0.0256079
SIDT2	protein_coding	SID1 transmembrane family member 2 [Source:HGNC Symbol;Acc:HGNC:24272]	0.154471	0.00190867	0.0256492
SPEN	protein_coding	spen family transcriptional repressor [Source:HGNC Symbol;Acc:HGNC:17575]	0.144649	0.00190442	0.0256492
ADAM19	protein_coding	ADAM metallopeptidase domain 19 [Source:HGNC Symbol;Acc:HGNC:197]	0.103034	0.00190577	0.0256492
PAK1IP1	protein_coding	PAK1 interacting protein 1 [Source:HGNC Symbol;Acc:HGNC:20882]	-0.205319	0.00190782	0.0256492
DNM1	protein_coding	dynamin 1 [Source:HGNC Symbol;Acc:HGNC:2972]	0.464022	0.00191244	0.0256753
FAM222A	protein_coding	family with sequence similarity 222 member A [Source:HGNC Symbol;Acc:HGNC:25915]	0.568441	0.00192161	0.0257738
GLI3	protein_coding	GLI family zinc finger 3 [Source:HGNC Symbol;Acc:HGNC:4319]	0.211389	0.00193284	0.0258996
GATD1	protein_coding	glutamine amidotransferase class 1 domain containing 1 [Source:HGNC Symbol;Acc:HGNC:26616]	0.134751	0.00193878	0.0259545
TAF6	protein_coding	TATA-box binding protein associated factor 6 [Source:HGNC Symbol;Acc:HGNC:11540]	0.142226	0.00194357	0.0259939
ACTR2	protein_coding	actin related protein 2 [Source:HGNC Symbol;Acc:HGNC:169]	-0.115323	0.00195545	0.0261279
WDR24	protein_coding	WD repeat domain 24 [Source:HGNC Symbol;Acc:HGNC:20852]	0.235284	0.00195845	0.0261431
ZNF785	protein_coding	zinc finger protein 785 [Source:HGNC Symbol;Acc:HGNC:26496]	0.207105	0.0019609	0.026151
GGACT	protein_coding	gamma-glutamylamine cyclotransferase [Source:HGNC Symbol;Acc:HGNC:25100]	-0.292552	0.00197222	0.0262769
SLC9A3-AS1	lncRNA	SLC9A3 antisense RNA 1 [Source:HGNC Symbol;Acc:HGNC:40550]	0.319486	0.00198008	0.0263316
NDC80	protein_coding	NDC80 kinetochore complex component [Source:HGNC Symbol;Acc:HGNC:16909]	-0.271207	0.00197856	0.0263316
RPL14	protein_coding	ribosomal protein L14 [Source:HGNC Symbol;Acc:HGNC:10305]	-0.11429	0.0019854	0.0263774
PCNT	protein_coding	pericentrin [Source:HGNC Symbol;Acc:HGNC:16068]	0.138375	0.00198762	0.0263819
SEMA5A	protein_coding	semaphorin 5A [Source:HGNC Symbol;Acc:HGNC:10736]	0.155291	0.00199653	0.0264753
CBR3	protein_coding	carbonyl reductase 3 [Source:HGNC Symbol;Acc:HGNC:1549]	-0.225567	0.00200356	0.0265434
RGS10	protein_coding	regulator of G protein signaling 10 [Source:HGNC Symbol;Acc:HGNC:9992]	-0.227934	0.00200996	0.026578
CACNB1	protein_coding	calcium voltage-gated channel auxiliary subunit beta 1 [Source:HGNC Symbol;Acc:HGNC:1401]	0.22885	0.00202883	0.0268023
PCIF1	protein_coding	phosphorylated CTD interacting factor 1 [Source:HGNC Symbol;Acc:HGNC:16200]	0.189414	0.00203101	0.0268059
ZNF330	protein_coding	zinc finger protein 330 [Source:HGNC Symbol;Acc:HGNC:15462]	-0.16089	0.00203532	0.0268375
ZNF219	protein_coding	zinc finger protein 219 [Source:HGNC Symbol;Acc:HGNC:13011]	0.300093	0.00204272	0.0268846
RLF	protein_coding	RLF zinc finger [Source:HGNC Symbol;Acc:HGNC:10025]	-0.21137	0.00204121	0.0268846
PKD1	protein_coding	polycystin 1, transient receptor potential channel interacting [Source:HGNC Symbol;Acc:HGNC:9008]	0.139469	0.00204579	0.0268999
ZNF286B	lncRNA	zinc finger protein 286B (pseudogene) [Source:HGNC Symbol;Acc:HGNC:33241]	0.492416	0.00206358	0.0269857
ENG	protein_coding	endoglin [Source:HGNC Symbol;Acc:HGNC:3349]	0.198538	0.00206577	0.0269857
TYRO3	protein_coding	TYRO3 protein tyrosine kinase [Source:HGNC Symbol;Acc:HGNC:12446]	0.175681	0.00206342	0.0269857
TMEM94	protein_coding	transmembrane protein 94 [Source:HGNC Symbol;Acc:HGNC:28983]	0.165267	0.00206163	0.0269857
RPL38	protein_coding	ribosomal protein L38 [Source:HGNC Symbol;Acc:HGNC:10349]	-0.122964	0.00206413	0.0269857
RAP1GDS1	protein_coding	Rap1 GTPase-GDP dissociation stimulator 1 [Source:HGNC Symbol;Acc:HGNC:9859]	-0.126875	0.00206138	0.0269857
GIPC2	protein_coding	GIPC PDZ domain containing family member 2 [Source:HGNC Symbol;Acc:HGNC:18177]	-0.54975	0.00205782	0.0269857
MAP1S	protein_coding	microtubule associated protein 1S [Source:HGNC Symbol;Acc:HGNC:15715]	0.165259	0.00207297	0.0270546
APLN	protein_coding	apelin [Source:HGNC Symbol;Acc:HGNC:16665]	-0.415311	0.00208258	0.0271548
RAB26	protein_coding	RAB26, member RAS oncogene family [Source:HGNC Symbol;Acc:HGNC:14259]	0.607288	0.00209044	0.027232
PPP2CB	protein_coding	protein phosphatase 2 catalytic subunit beta [Source:HGNC Symbol;Acc:HGNC:9300]	-0.127759	0.00209734	0.0272879
UQCRQ	protein_coding	ubiquinol-cytochrome c reductase complex III subunit VII [Source:HGNC Symbol;Acc:HGNC:29594]	-0.133618	0.00209862	0.0272879
GPR78	protein_coding	G protein-coupled receptor 78 [Source:HGNC Symbol;Acc:HGNC:4528]	0.741896	0.00210505	0.0273226
BCR	protein_coding	BCR activator of RhoGEF and GTPase [Source:HGNC Symbol;Acc:HGNC:1014]	0.135127	0.00210639	0.0273226
NOP58	protein_coding	NOP58 ribonucleoprotein [Source:HGNC Symbol;Acc:HGNC:29926]	-0.164144	0.00210713	0.0273226
DNAAF9	protein_coding	dynein axonemal assembly factor 9 [Source:HGNC Symbol;Acc:HGNC:17721]	0.150748	0.00211194	0.0273597
RPL39	protein_coding	ribosomal protein L39 [Source:HGNC Symbol;Acc:HGNC:10350]	-0.164304	0.00212595	0.0275158
SAC3D1	protein_coding	SAC3 domain containing 1 [Source:HGNC Symbol;Acc:HGNC:30179]	-0.19113	0.00212983	0.0275407
ITGA5	protein_coding	integrin subunit alpha 5 [Source:HGNC Symbol;Acc:HGNC:6141]	0.120255	0.0021359	0.0275937
RPS5	protein_coding	ribosomal protein S5 [Source:HGNC Symbol;Acc:HGNC:10426]	-0.127187	0.00214325	0.0276633
COASY	protein_coding	Coenzyme A synthase [Source:HGNC Symbol;Acc:HGNC:29932]	0.173399	0.00216855	0.0279641
PLCB3	protein_coding	phospholipase C beta 3 [Source:HGNC Symbol;Acc:HGNC:9056]	0.12353	0.00217061	0.027965
PTK7	protein_coding	protein tyrosine kinase 7 (inactive) [Source:HGNC Symbol;Acc:HGNC:9618]	0.17345	0.00218297	0.0280985
PCDHGC5	protein_coding	protocadherin gamma subfamily C, 5 [Source:HGNC Symbol;Acc:HGNC:8718]	0.340313	0.00219102	0.0281247
IQSEC1	protein_coding	IQ motif and Sec7 domain ArfGEF 1 [Source:HGNC Symbol;Acc:HGNC:29112]	0.160414	0.00218899	0.0281247
PACS1	protein_coding	phosphofurin acidic cluster sorting protein 1 [Source:HGNC Symbol;Acc:HGNC:30032]	0.130585	0.00219008	0.0281247
PPIL1	protein_coding	peptidylprolyl isomerase like 1 [Source:HGNC Symbol;Acc:HGNC:9260]	-0.146643	0.00220292	0.028226
IER5	protein_coding	immediate early response 5 [Source:HGNC Symbol;Acc:HGNC:5393]	-0.148513	0.00220126	0.028226
UHMK1	protein_coding	U2AF homology motif kinase 1 [Source:HGNC Symbol;Acc:HGNC:19683]	-0.137418	0.00220779	0.0282626
UBLCP1	protein_coding	ubiquitin like domain containing CTD phosphatase 1 [Source:HGNC Symbol;Acc:HGNC:28110]	-0.143283	0.00222393	0.0284174
EIF5B	protein_coding	eukaryotic translation initiation factor 5B [Source:HGNC Symbol;Acc:HGNC:30793]	-0.111929	0.00222653	0.0284247
PDZD11	protein_coding	PDZ domain containing 11 [Source:HGNC Symbol;Acc:HGNC:28034]	-0.123361	0.0022324	0.0284737
RNF150	protein_coding	ring finger protein 150 [Source:HGNC Symbol;Acc:HGNC:23138]	0.311238	0.00224816	0.0285193
ZFAT	protein_coding	zinc finger and AT-hook domain containing [Source:HGNC Symbol;Acc:HGNC:19899]	0.220198	0.00224013	0.0285193
ANKS1A	protein_coding	ankyrin repeat and sterile alpha motif domain containing 1A [Source:HGNC Symbol;Acc:HGNC:20961]	0.198549	0.00224663	0.0285193
TECR	protein_coding	trans-2,3-enoyl-CoA reductase [Source:HGNC Symbol;Acc:HGNC:4551]	0.158339	0.00224128	0.0285193
TYMS	protein_coding	thymidylate synthetase [Source:HGNC Symbol;Acc:HGNC:12441]	-0.210938	0.00224456	0.0285193
PBK	protein_coding	PDZ binding kinase [Source:HGNC Symbol;Acc:HGNC:18282]	-0.287078	0.00224234	0.0285193
PURG	protein_coding	purine rich element binding protein G [Source:HGNC Symbol;Acc:HGNC:17930]	0.543739	0.00228127	0.0288352
ZNF550	protein_coding	zinc finger protein 550 [Source:HGNC Symbol;Acc:HGNC:28643]	0.206847	0.0022801	0.0288352
BEX4	protein_coding	brain expressed X-linked 4 [Source:HGNC Symbol;Acc:HGNC:25475]	-0.167758	0.00227843	0.0288352
ZNF224	protein_coding	zinc finger protein 224 [Source:HGNC Symbol;Acc:HGNC:13017]	0.202657	0.0022884	0.0288642
STAT5B	protein_coding	signal transducer and activator of transcription 5B [Source:HGNC Symbol;Acc:HGNC:11367]	0.170442	0.00228865	0.0288642
POLR3H	protein_coding	RNA polymerase III subunit H [Source:HGNC Symbol;Acc:HGNC:30349]	0.137382	0.00228973	0.0288642
S100A10	protein_coding	S100 calcium binding protein A10 [Source:HGNC Symbol;Acc:HGNC:10487]	-0.135541	0.00229229	0.0288706
FRAS1	protein_coding	Fraser extracellular matrix complex subunit 1 [Source:HGNC Symbol;Acc:HGNC:19185]	0.303002	0.00229702	0.0289042
GLUD1	protein_coding	glutamate dehydrogenase 1 [Source:HGNC Symbol;Acc:HGNC:4335]	-0.113584	0.00230641	0.0289786
RASA1	protein_coding	RAS p21 protein activator 1 [Source:HGNC Symbol;Acc:HGNC:9871]	-0.15193	0.00230706	0.0289786
CHERP	protein_coding	calcium homeostasis endoplasmic reticulum protein [Source:HGNC Symbol;Acc:HGNC:16930]	0.154755	0.00230927	0.0289804
CSE1L	protein_coding	chromosome segregation 1 like [Source:HGNC Symbol;Acc:HGNC:2431]	-0.173559	0.00231816	0.0290661
TNFSF18	protein_coding	TNF superfamily member 18 [Source:HGNC Symbol;Acc:HGNC:11932]	-0.61904	0.00232027	0.0290665
CBX7	protein_coding	chromobox 7 [Source:HGNC Symbol;Acc:HGNC:1557]	0.302299	0.00232987	0.0291348
RPL12	protein_coding	ribosomal protein L12 [Source:HGNC Symbol;Acc:HGNC:10302]	-0.12584	0.0023286	0.0291348
EFNA5	protein_coding	ephrin A5 [Source:HGNC Symbol;Acc:HGNC:3225]	0.322174	0.00233281	0.0291399
SSBP1	protein_coding	single stranded DNA binding protein 1 [Source:HGNC Symbol;Acc:HGNC:11317]	-0.148631	0.00233443	0.0291399
MLLT1	protein_coding	MLLT1 super elongation complex subunit [Source:HGNC Symbol;Acc:HGNC:7134]	0.141508	0.00233994	0.0291828
RABGGTB	protein_coding	Rab geranylgeranyltransferase subunit beta [Source:HGNC Symbol;Acc:HGNC:9796]	-0.172018	0.00234522	0.0292227
RRN3	protein_coding	RRN3 homolog, RNA polymerase I transcription factor [Source:HGNC Symbol;Acc:HGNC:30346]	-0.145125	0.00235224	0.0292841
ANK1	protein_coding	ankyrin 1 [Source:HGNC Symbol;Acc:HGNC:492]	0.248385	0.00235977	0.0292999
RPLP2	protein_coding	ribosomal protein lateral stalk subunit P2 [Source:HGNC Symbol;Acc:HGNC:10377]	-0.133444	0.00235747	0.0292999
B4GALT4	protein_coding	beta-1,4-galactosyltransferase 4 [Source:HGNC Symbol;Acc:HGNC:927]	-0.13686	0.00235889	0.0292999
STK38L	protein_coding	serine/threonine kinase 38 like [Source:HGNC Symbol;Acc:HGNC:17848]	-0.145211	0.00236238	0.0293064
SLC7A6	protein_coding	solute carrier family 7 member 6 [Source:HGNC Symbol;Acc:HGNC:11064]	0.205199	0.00237667	0.0294318
GOPC	protein_coding	golgi associated PDZ and coiled-coil motif containing [Source:HGNC Symbol;Acc:HGNC:17643]	-0.12675	0.00237647	0.0294318
ANTXR1	protein_coding	ANTXR cell adhesion molecule 1 [Source:HGNC Symbol;Acc:HGNC:21014]	0.127809	0.00238995	0.02957
GPR75	protein_coding	G protein-coupled receptor 75 [Source:HGNC Symbol;Acc:HGNC:4526]	0.69752	0.00240294	0.0296264
INSIG1	protein_coding	insulin induced gene 1 [Source:HGNC Symbol;Acc:HGNC:6083]	0.212684	0.00240082	0.0296264
RPL19	protein_coding	ribosomal protein L19 [Source:HGNC Symbol;Acc:HGNC:10312]	-0.113189	0.00240128	0.0296264
COPRS	protein_coding	coordinator of PRMT5 and differentiation stimulator [Source:HGNC Symbol;Acc:HGNC:28848]	-0.161051	0.0023994	0.0296264
SKIC3	protein_coding	SKI3 subunit of superkiller complex [Source:HGNC Symbol;Acc:HGNC:23639]	-0.113145	0.00240597	0.0296378
ERVK3-1	protein_coding	endogenous retrovirus group K3 member 1 [Source:HGNC Symbol;Acc:HGNC:30466]	0.231855	0.00241405	0.0296852
MYO9B	protein_coding	myosin IXB [Source:HGNC Symbol;Acc:HGNC:7609]	0.103589	0.00241392	0.0296852
ZNF615	protein_coding	zinc finger protein 615 [Source:HGNC Symbol;Acc:HGNC:24740]	-0.277694	0.0024331	0.0298672
POLR2F	protein_coding	RNA polymerase II, I and III subunit F [Source:HGNC Symbol;Acc:HGNC:9193]	-0.1446	0.0024353	0.0298681
TMEM126A	protein_coding	transmembrane protein 126A [Source:HGNC Symbol;Acc:HGNC:25382]	-0.179058	0.0024385	0.0298811
NLGN2	protein_coding	neuroligin 2 [Source:HGNC Symbol;Acc:HGNC:14290]	0.170182	0.00244754	0.0299658
TCP11L2	protein_coding	t-complex 11 like 2 [Source:HGNC Symbol;Acc:HGNC:28627]	0.229577	0.00245548	0.029991
MFAP1	protein_coding	microfibril associated protein 1 [Source:HGNC Symbol;Acc:HGNC:7032]	-0.129999	0.00245343	0.029991
HMGN2	protein_coding	high mobility group nucleosomal binding domain 2 [Source:HGNC Symbol;Acc:HGNC:4986]	-0.213916	0.002456	0.029991
IPO11	protein_coding	importin 11 [Source:HGNC Symbol;Acc:HGNC:20628]	-0.176648	0.00245999	0.0300135
SLC25A42	protein_coding	solute carrier family 25 member 42 [Source:HGNC Symbol;Acc:HGNC:28380]	0.189236	0.00246628	0.0300325
MCM3AP	protein_coding	minichromosome maintenance complex component 3 associated protein [Source:HGNC Symbol;Acc:HGNC:6946]	0.11709	0.00246796	0.0300325
TMEM242	protein_coding	transmembrane protein 242 [Source:HGNC Symbol;Acc:HGNC:17206]	-0.153276	0.00246446	0.0300325
TMEM26	protein_coding	transmembrane protein 26 [Source:HGNC Symbol;Acc:HGNC:28550]	0.641488	0.00247602	0.0301045
MYL9	protein_coding	myosin light chain 9 [Source:HGNC Symbol;Acc:HGNC:15754]	0.123331	0.00248184	0.0301474
AP3S1	protein_coding	adaptor related protein complex 3 subunit sigma 1 [Source:HGNC Symbol;Acc:HGNC:2013]	-0.130694	0.00248384	0.0301474
UBAP1L	protein_coding	ubiquitin associated protein 1 like [Source:HGNC Symbol;Acc:HGNC:40028]	0.73554	0.00250204	0.030316
WDR6	protein_coding	WD repeat domain 6 [Source:HGNC Symbol;Acc:HGNC:12758]	0.11118	0.00250437	0.030318
CKAP5	protein_coding	cytoskeleton associated protein 5 [Source:HGNC Symbol;Acc:HGNC:28959]	-0.131445	0.00250661	0.0303189
PEAR1	protein_coding	platelet endothelial aggregation receptor 1 [Source:HGNC Symbol;Acc:HGNC:33631]	0.122971	0.00252767	0.0305474
PI4KAP1	lncRNA	phosphatidylinositol 4-kinase alpha pseudogene 1 [Source:NCBI gene (formerly Entrezgene);Acc:728233]	0.430827	0.00253895	0.030581
OPA1	protein_coding	OPA1 mitochondrial dynamin like GTPase [Source:HGNC Symbol;Acc:HGNC:8140]	-0.136959	0.00253297	0.030581
IFNGR2	protein_coding	interferon gamma receptor 2 [Source:HGNC Symbol;Acc:HGNC:5440]	-0.151084	0.00253806	0.030581
DCTPP1	protein_coding	dCTP pyrophosphatase 1 [Source:HGNC Symbol;Acc:HGNC:28777]	-0.181085	0.00253916	0.030581
SHCBP1	protein_coding	SHC binding and spindle associated 1 [Source:HGNC Symbol;Acc:HGNC:29547]	-0.260092	0.00254164	0.0305846
RPL4	protein_coding	ribosomal protein L4 [Source:HGNC Symbol;Acc:HGNC:10353]	-0.122257	0.00255654	0.030685
ARHGAP26	protein_coding	Rho GTPase activating protein 26 [Source:HGNC Symbol;Acc:HGNC:17073]	0.264265	0.00256684	0.0307299
ATG4D	protein_coding	autophagy related 4D cysteine peptidase [Source:HGNC Symbol;Acc:HGNC:20789]	0.184658	0.00256318	0.0307299
CNN2	protein_coding	calponin 2 [Source:HGNC Symbol;Acc:HGNC:2156]	0.141709	0.00256489	0.0307299
PRDM1	protein_coding	PR/SET domain 1 [Source:HGNC Symbol;Acc:HGNC:9346]	0.298701	0.00257107	0.0307346
BCL7C	protein_coding	BAF chromatin remodeling complex subunit BCL7C [Source:HGNC Symbol;Acc:HGNC:1006]	-0.198943	0.00257161	0.0307346
ARID1A	protein_coding	AT-rich interaction domain 1A [Source:HGNC Symbol;Acc:HGNC:11110]	0.118852	0.00258501	0.0307952
GDI2	protein_coding	GDP dissociation inhibitor 2 [Source:HGNC Symbol;Acc:HGNC:4227]	-0.102468	0.00258984	0.0307952
SET	protein_coding	SET nuclear proto-oncogene [Source:HGNC Symbol;Acc:HGNC:10760]	-0.139653	0.00258784	0.0307952
SUPT16H	protein_coding	SPT16 homolog, facilitates chromatin remodeling subunit [Source:HGNC Symbol;Acc:HGNC:11465]	-0.148647	0.00258135	0.0307952
GRPEL1	protein_coding	GrpE like 1, mitochondrial [Source:HGNC Symbol;Acc:HGNC:19696]	-0.168979	0.00258189	0.0307952
KIF4A	protein_coding	kinesin family member 4A [Source:HGNC Symbol;Acc:HGNC:13339]	-0.226566	0.0025886	0.0307952
BST1	protein_coding	bone marrow stromal cell antigen 1 [Source:HGNC Symbol;Acc:HGNC:1118]	-0.159455	0.00259292	0.0308057
COL12A1	protein_coding	collagen type XII alpha 1 chain [Source:HGNC Symbol;Acc:HGNC:2188]	0.158846	0.00260349	0.0309051
PPARGC1B	protein_coding	PPARG coactivator 1 beta [Source:HGNC Symbol;Acc:HGNC:30022]	0.283653	0.00261418	0.0309797
RPS19	protein_coding	ribosomal protein S19 [Source:HGNC Symbol;Acc:HGNC:10402]	-0.1172	0.0026132	0.0309797
ATM	protein_coding	ATM serine/threonine kinase [Source:HGNC Symbol;Acc:HGNC:795]	-0.134274	0.00262198	0.031046
USP22	protein_coding	ubiquitin specific peptidase 22 [Source:HGNC Symbol;Acc:HGNC:12621]	0.107159	0.00262477	0.0310528
MARK2	protein_coding	microtubule affinity regulating kinase 2 [Source:HGNC Symbol;Acc:HGNC:3332]	0.166415	0.00263071	0.0310968
MTND4P24	processed_pseudogene	MT-ND4 pseudogene 24 [Source:HGNC Symbol;Acc:HGNC:42220]	-0.385243	0.0026424	0.0312088
DNAH10OS	lncRNA	dynein axonemal heavy chain 10 opposite strand [Source:HGNC Symbol;Acc:HGNC:37121]	0.348869	0.00264529	0.0312167
TMT1A	protein_coding	thiol methyltransferase 1A [Source:HGNC Symbol;Acc:HGNC:24550]	0.45697	0.00267405	0.0312883
GULP1	protein_coding	GULP PTB domain containing engulfment adaptor 1 [Source:HGNC Symbol;Acc:HGNC:18649]	0.247892	0.00266136	0.0312883
LDB1	protein_coding	LIM domain binding 1 [Source:HGNC Symbol;Acc:HGNC:6532]	0.127458	0.00266318	0.0312883
DCAF5	protein_coding	DDB1 and CUL4 associated factor 5 [Source:HGNC Symbol;Acc:HGNC:20224]	0.124969	0.00266432	0.0312883
DCAF13	protein_coding	DDB1 and CUL4 associated factor 13 [Source:HGNC Symbol;Acc:HGNC:24535]	-0.133588	0.00266566	0.0312883
TAF12	protein_coding	TATA-box binding protein associated factor 12 [Source:HGNC Symbol;Acc:HGNC:11545]	-0.153099	0.00267404	0.0312883
PPP1R14B	protein_coding	protein phosphatase 1 regulatory inhibitor subunit 14B [Source:HGNC Symbol;Acc:HGNC:9057]	-0.163232	0.00265853	0.0312883
FASTKD3	protein_coding	FAST kinase domains 3 [Source:HGNC Symbol;Acc:HGNC:28758]	-0.225019	0.00267686	0.0312883
ABCA5	protein_coding	ATP binding cassette subfamily A member 5 [Source:HGNC Symbol;Acc:HGNC:35]	-0.231901	0.0026781	0.0312883
SERPINB7	protein_coding	serpin family B member 7 [Source:HGNC Symbol;Acc:HGNC:13902]	-0.232839	0.00267563	0.0312883
SAP30	protein_coding	Sin3A associated protein 30 [Source:HGNC Symbol;Acc:HGNC:10532]	-0.237081	0.00267339	0.0312883
GPCPD1	protein_coding	glycerophosphocholine phosphodiesterase 1 [Source:HGNC Symbol;Acc:HGNC:26957]	-0.318199	0.0026669	0.0312883
RPS27	protein_coding	ribosomal protein S27 [Source:HGNC Symbol;Acc:HGNC:10416]	-0.114555	0.00268859	0.0313848
UBQLN2	protein_coding	ubiquilin 2 [Source:HGNC Symbol;Acc:HGNC:12509]	0.11098	0.00269107	0.0313876
AFF1	protein_coding	ALF transcription elongation factor 1 [Source:HGNC Symbol;Acc:HGNC:7135]	0.195709	0.00269669	0.031427
GPATCH8	protein_coding	G-patch domain containing 8 [Source:HGNC Symbol;Acc:HGNC:29066]	0.12271	0.00270274	0.0314544
ZNF660	protein_coding	zinc finger protein 660 [Source:HGNC Symbol;Acc:HGNC:26720]	-0.32188	0.00270352	0.0314544
ZC3H3	protein_coding	zinc finger CCCH-type containing 3 [Source:HGNC Symbol;Acc:HGNC:28972]	0.179469	0.00271222	0.0315296
MYSM1	protein_coding	Myb like, SWIRM and MPN domains 1 [Source:HGNC Symbol;Acc:HGNC:29401]	-0.168111	0.00272361	0.0316358
RUBCN	protein_coding	rubicon autophagy regulator [Source:HGNC Symbol;Acc:HGNC:28991]	0.175602	0.00272843	0.0316656
SPDL1	protein_coding	spindle apparatus coiled-coil protein 1 [Source:HGNC Symbol;Acc:HGNC:26010]	-0.233521	0.00274177	0.0317941
MED15	protein_coding	mediator complex subunit 15 [Source:HGNC Symbol;Acc:HGNC:14248]	0.13233	0.00275842	0.0319608
FBL	protein_coding	fibrillarin [Source:HGNC Symbol;Acc:HGNC:3599]	-0.156753	0.00276071	0.031961
RPL37	protein_coding	ribosomal protein L37 [Source:HGNC Symbol;Acc:HGNC:10347]	-0.126817	0.00277319	0.032079
PTK2	protein_coding	protein tyrosine kinase 2 [Source:HGNC Symbol;Acc:HGNC:9611]	-0.106416	0.00277767	0.0321043
PTTG1	protein_coding	PTTG1 regulator of sister chromatid separation, securin [Source:HGNC Symbol;Acc:HGNC:9690]	-0.16812	0.00278558	0.0321694
ZNF749	protein_coding	zinc finger protein 749 [Source:HGNC Symbol;Acc:HGNC:32783]	0.295042	0.00279824	0.0322332
MPZL1	protein_coding	myelin protein zero like 1 [Source:HGNC Symbol;Acc:HGNC:7226]	0.161466	0.00280013	0.0322332
RPSA	protein_coding	ribosomal protein SA [Source:HGNC Symbol;Acc:HGNC:6502]	-0.121115	0.00280029	0.0322332
COP1	protein_coding	COP1 E3 ubiquitin ligase [Source:HGNC Symbol;Acc:HGNC:17440]	-0.130223	0.00279385	0.0322332
CLSTN3	protein_coding	calsyntenin 3 [Source:HGNC Symbol;Acc:HGNC:18371]	0.185413	0.00282687	0.0325125
PSMC3	protein_coding	proteasome 26S subunit, ATPase 3 [Source:HGNC Symbol;Acc:HGNC:9549]	-0.109346	0.00282927	0.0325134
GTF2F2	protein_coding	general transcription factor IIF subunit 2 [Source:HGNC Symbol;Acc:HGNC:4653]	-0.189688	0.00283893	0.0325978
EPHB3	protein_coding	EPH receptor B3 [Source:HGNC Symbol;Acc:HGNC:3394]	0.34237	0.00284825	0.0326221
GALNT2	protein_coding	polypeptide N-acetylgalactosaminyltransferase 2 [Source:HGNC Symbol;Acc:HGNC:4124]	0.119556	0.00284429	0.0326221
DDX24	protein_coding	DEAD-box helicase 24 [Source:HGNC Symbol;Acc:HGNC:13266]	-0.102313	0.00285034	0.0326221
CAPZA1	protein_coding	capping actin protein of muscle Z-line subunit alpha 1 [Source:HGNC Symbol;Acc:HGNC:1488]	-0.11193	0.00284612	0.0326221
GIT1	protein_coding	GIT ArfGAP 1 [Source:HGNC Symbol;Acc:HGNC:4272]	0.132369	0.00285469	0.0326453
CACNG7	protein_coding	calcium voltage-gated channel auxiliary subunit gamma 7 [Source:HGNC Symbol;Acc:HGNC:13626]	0.264336	0.00285947	0.0326734
SFTA1P	lncRNA	surfactant associated 1, lncRNA [Source:HGNC Symbol;Acc:HGNC:18383]	-0.219997	0.00287207	0.0327906
MTCH2	protein_coding	mitochondrial carrier 2 [Source:HGNC Symbol;Acc:HGNC:17587]	-0.11302	0.00287987	0.032853
LINC01410	lncRNA	long intergenic non-protein coding RNA 1410 [Source:HGNC Symbol;Acc:HGNC:50702]	-0.313303	0.00289129	0.0329565
RPS9	protein_coding	ribosomal protein S9 [Source:HGNC Symbol;Acc:HGNC:10442]	-0.132578	0.00289662	0.0329905
MBOAT7	protein_coding	membrane bound O-acyltransferase domain containing 7 [Source:HGNC Symbol;Acc:HGNC:15505]	0.13394	0.00290801	0.0330933
RAB29	protein_coding	RAB29, member RAS oncogene family [Source:HGNC Symbol;Acc:HGNC:9789]	0.195758	0.00291316	0.0331034
SGSH	protein_coding	N-sulfoglucosamine sulfohydrolase [Source:HGNC Symbol;Acc:HGNC:10818]	0.170448	0.00291499	0.0331034
PSMA4	protein_coding	proteasome 20S subunit alpha 4 [Source:HGNC Symbol;Acc:HGNC:9533]	-0.115083	0.00291597	0.0331034
KMT2C	protein_coding	lysine methyltransferase 2C [Source:HGNC Symbol;Acc:HGNC:13726]	0.12999	0.00291983	0.0331205
PAX7	protein_coding	paired box 7 [Source:HGNC Symbol;Acc:HGNC:8621]	0.275753	0.00293859	0.0333064
ZNF629	protein_coding	zinc finger protein 629 [Source:HGNC Symbol;Acc:HGNC:29008]	0.141742	0.00295341	0.0334474
UBE2W	protein_coding	ubiquitin conjugating enzyme E2 W [Source:HGNC Symbol;Acc:HGNC:25616]	-0.138114	0.00296228	0.0334938
POLR1F	protein_coding	RNA polymerase I subunit F [Source:HGNC Symbol;Acc:HGNC:18027]	-0.189776	0.00296957	0.0335492
MPST	protein_coding	mercaptopyruvate sulfurtransferase [Source:HGNC Symbol;Acc:HGNC:7223]	0.177411	0.00298615	0.0337095
KIAA0319L	protein_coding	KIAA0319 like [Source:HGNC Symbol;Acc:HGNC:30071]	0.152943	0.00301596	0.0339486
DKC1	protein_coding	dyskerin pseudouridine synthase 1 [Source:HGNC Symbol;Acc:HGNC:2890]	-0.136869	0.00301754	0.0339486
NSMCE1	protein_coding	NSE1 homolog, SMC5-SMC6 complex component [Source:HGNC Symbol;Acc:HGNC:29897]	-0.195951	0.00301943	0.0339486
HAPLN1	protein_coding	hyaluronan and proteoglycan link protein 1 [Source:HGNC Symbol;Acc:HGNC:2380]	-0.60908	0.00301699	0.0339486
AIFM2	protein_coding	apoptosis inducing factor mitochondria associated 2 [Source:HGNC Symbol;Acc:HGNC:21411]	0.218255	0.0030289	0.0340278
FER	protein_coding	FER tyrosine kinase [Source:HGNC Symbol;Acc:HGNC:3655]	-0.143138	0.00303266	0.0340429
RPA1	protein_coding	replication protein A1 [Source:HGNC Symbol;Acc:HGNC:10289]	-0.149836	0.00304045	0.0341031
OCIAD2	protein_coding	OCIA domain containing 2 [Source:HGNC Symbol;Acc:HGNC:28685]	-0.195385	0.00305746	0.0342665
TRA2B	protein_coding	transformer 2 beta homolog [Source:HGNC Symbol;Acc:HGNC:10781]	-0.160324	0.00306203	0.0342904
FABP5	protein_coding	fatty acid binding protein 5 [Source:HGNC Symbol;Acc:HGNC:3560]	-0.203601	0.00306717	0.0343205
ERBB2	protein_coding	erb-b2 receptor tyrosine kinase 2 [Source:HGNC Symbol;Acc:HGNC:3430]	0.126456	0.00308204	0.0344595
NAP1L1	protein_coding	nucleosome assembly protein 1 like 1 [Source:HGNC Symbol;Acc:HGNC:7637]	-0.127971	0.00309378	0.0345555
PIGA	protein_coding	phosphatidylinositol glycan anchor biosynthesis class A [Source:HGNC Symbol;Acc:HGNC:8957]	-0.250129	0.00309555	0.0345555
HCFC1R1	protein_coding	host cell factor C1 regulator 1 [Source:HGNC Symbol;Acc:HGNC:21198]	0.223483	0.00310026	0.0345806
SP2	protein_coding	Sp2 transcription factor [Source:HGNC Symbol;Acc:HGNC:11207]	0.165928	0.00311652	0.0347343
DGKD	protein_coding	diacylglycerol kinase delta [Source:HGNC Symbol;Acc:HGNC:2851]	0.147384	0.00312422	0.034765
NID2	protein_coding	nidogen 2 [Source:HGNC Symbol;Acc:HGNC:13389]	0.140565	0.00313822	0.0348722
SLC35F6	protein_coding	solute carrier family 35 member F6 [Source:HGNC Symbol;Acc:HGNC:26055]	0.136138	0.00313882	0.0348722
NEK2	protein_coding	NIMA related kinase 2 [Source:HGNC Symbol;Acc:HGNC:7745]	-0.256596	0.00315201	0.0349911
DTX2	protein_coding	deltex E3 ubiquitin ligase 2 [Source:HGNC Symbol;Acc:HGNC:15973]	0.27928	0.00315596	0.0350072
COL27A1	protein_coding	collagen type XXVII alpha 1 chain [Source:HGNC Symbol;Acc:HGNC:22986]	0.174155	0.00317854	0.0352299
CORO6	protein_coding	coronin 6 [Source:HGNC Symbol;Acc:HGNC:21356]	0.264781	0.00319136	0.035344
DLG5	protein_coding	discs large MAGUK scaffold protein 5 [Source:HGNC Symbol;Acc:HGNC:2904]	0.126094	0.0032048	0.035437
NUP93	protein_coding	nucleoporin 93 [Source:HGNC Symbol;Acc:HGNC:28958]	-0.112163	0.00320272	0.035437
WNK1	protein_coding	WNK lysine deficient protein kinase 1 [Source:HGNC Symbol;Acc:HGNC:14540]	0.155211	0.00321302	0.0355
RAPGEFL1	protein_coding	Rap guanine nucleotide exchange factor like 1 [Source:HGNC Symbol;Acc:HGNC:17428]	0.230071	0.00322667	0.0355632
SGSM2	protein_coding	small G protein signaling modulator 2 [Source:HGNC Symbol;Acc:HGNC:29026]	0.140248	0.00322181	0.0355632
TIMP2	protein_coding	TIMP metallopeptidase inhibitor 2 [Source:HGNC Symbol;Acc:HGNC:11821]	0.102352	0.00322887	0.0355632
GRSF1	protein_coding	G-rich RNA sequence binding factor 1 [Source:HGNC Symbol;Acc:HGNC:4610]	-0.11604	0.00322697	0.0355632
ARMC8	protein_coding	armadillo repeat containing 8 [Source:HGNC Symbol;Acc:HGNC:24999]	-0.136006	0.00323284	0.035579
[truncated: 277 more rows]

## Sheet: Suppl. Table 5
Supp. Table 5 - Gene ontology (MF) of pericytes exposed to serum (MDD vs CTRL women)
[truncated: 228 more rows]

## Sheet: Suppl. Table 6
Suppl. Table 6 - Correlations between ECM-related DEGs and CTRL samples
[truncated: 5 more rows]
[truncated: 2 more columns]

[truncated: 7 more sheets: Suppl. Table 7, Suppl. Table 8, Suppl. Table 9, Suppl. Table 10, Supp. Table 11, Supp. Table 12, Supp. Table 13]
