# Supplementary material for: Pericytes modulate brain vascular integrity in social stress and depression
Source: Research Square preprint supplement (doi:10.21203/rs.3.rs-5060339/v1), 2024-10-08
Supplement: Supplementary file 2 [file c1c431c0eda1e0b3d743ceab.xlsx]

## Sheet: Fig 1
Fig.1 Chronic stress and depression alter pericyte gene expression and morphology.
Panel	Type	Group	N value	Replicate	Normality	Statistical test	P value	F value	Kruskal-Wallis statistic	Outliers
1a	SI	CTRL	10	Mouse	Yes	1-way ANOVA	**** <0.0001	28.37	-	-
		SS	7	Mouse
		RES	15	Mouse
PFC
Panel	Gene	Group	N value	Replicate	Normality	Statistical test	P value	F value	Kruskal-Wallis statistic	Outliers	Justification
1b	Pecam1	CTRL	10	Mouse	Yes	1-way ANOVA	* 0.0280	4.096	-	2	CT > 2 SD from group avg.
		SS	7	Mouse
		RES	13	Mouse
	Vegfa	CTRL	9	Mouse	No	Kruskal-Wallis	** 0.002	-	12.43	2	"
		SS	6	Mouse
		RES	15	Mouse
	Vegfb	CTRL	10	Mouse	No	Kruskal-Wallis	0.6115	-	0.9835
		SS	6	Mouse
		RES	15	Mouse
	Pdgfb	CTRL	10	Mouse	Yes	1-way ANOVA	* 0.0348	3.813	-	2	"
		SS	7	Mouse
		RES	13	Mouse
	Pdgfrb	CTRL	9	Mouse	Yes	1-way ANOVA	** 0.0020	8.027	-	4	Sample failed to replicate
		SS	6	Mouse
		RES	13	Mouse
	Cspg4	CTRL	9	Mouse	Yes	1-way ANOVA	* 0.0259	4.195		2
		SS	7	Mouse
		RES	14	Mouse
	Des	CTRL	10	Mouse	Yes	1-way ANOVA	* 0.0343	3.798	-	-
		SS	7	Mouse
		RES	15	Mouse
	Mcam	CTRL	9	Mouse	No	Kruskal-Wallis	* 0.0308	-	6.963	4	Sample failed to replicate
		SS	5	Mouse
		RES	13	Mouse
	Anpep	CTRL	9	Mouse	Yes	1-way ANOVA	0.4699	0.7759	-	1	CT > 2 SD from group avg.
		SS	7	Mouse
		RES	15	Mouse
	Abcc9	CTRL	9	Mouse	No	Kruskal-Wallis	0.3121		2.329	1	CT > 2 SD from group avg.
		SS	7	Mouse
		RES	15	Mouse
	Gapdh	CTRL	10	Mouse	No	Kruskal-Wallis	0.3029	-	2.389	-
		SS	7	Mouse
		RES	15	Mouse
Panel	Gene	Group	N value	Replicate	Normality	Statistical test	P value	F value
1c	Pdgfb	CTRL	10	Mouse	Yes	1-way ANOVA	* 0.0348	3.813
upper		SS	7	Mouse
		RES	13	Mouse
1c	Pdgfrb	CTRL	9	Mouse	Yes	1-way ANOVA	** 0.0020	8.027
lower		SS	6	Mouse
		RES	13	Mouse
Panel	Gene	Group	N value	Replicate	Statistical test		P value	F value	R-squared
1e	Correlation	CTRL	10	Mouse	Simple linear regression		* 0.0233	5.783	0.1764
upper		SS	7	Mouse
		RES	13	Mouse
1e	Correlation	CTRL	9	Mouse	Simple linear regression		****<0.0001	22.77	0.4869
lower		SS	6	Mouse
		RES	13	Mouse
Panel	Type	Group	N value	Replicate	Normality	Statistical test	P value	F value	Kruskal-Wallis statistic	Outliers
1i	SI	CTRL	5	Mouse	No	Kruskal-Wallis	*** 0.0010	-	10.29	-
		SS	5	Mouse
		RES	6	Mouse
Panel	Type	Group	N value	Replicate	Normality	Statistical test	P value	F value	Kruskal-Wallis statistic	Outliers
1j	Coverage	CTRL	5	Mouse	No	Mann-Whitney	* 0.0192	-	-	-
		SOCIAL STRESS	11	Mouse
Panel	Type	Group	N value	Replicate	Statistical test		P value	F value	R-squared	Outliers
1l	Correlation	SS	5	Mouse	Simple linear regression		0.0985	3.395	0.2739	-
		RES	6	Mouse
Panel	Type	Group	N value	Replicate	Statistical test		P value	F value	R-squared	Outliers
1m	Coverage	CTRL	4	Mouse	Simple linear regression		* 0.0264	6.4	0.3478	-
	EM	SS	5	Mouse
		RES	5	Mouse
Panel	Type	Group	N value	Replicate	Normality	Statistical test	P value	F value	Kruskal-Wallis statistic	Outliers
1n	Thickness	CTRL	4	Mouse	No	Kruskal-Wallis	* 0.0264	6.4	6.623	-
		SS	5	Mouse
		RES	5	Mouse
Panel	Type	Group	N value	Replicate	Normality	Statistical test	P value	F value	Kruskal-Wallis statistic	Outliers
1q	Coverage	CTRL	4	Human	No	Mann-Whitney	* 0.0196	-	-	-
		MDD	9	Human

## Sheet: Fig 2
Fig.2 Pericyte depletion and gain of function regulates anxiety and depressive behaviors
Panel	Type	Group	N value	Replicate	Normality	Statistical test	P value	F value	Kruskal-Wallis statistic	Outliers
2b	Coverage	VEH	4	Mouse	No	Mann-Whitney	* 0.0286	-	-	-
Panel	Type	Group	N value	Replicate	Normality	Statistical test	P value	Outliers	Justification
2d	SI	VEH	7	Mouse	No	Mann-Whitney	0.4634	1 DTX	SI > 2 SD from group avg.
left		DTX	8	Mouse
Panel	Type	Group	N value	Replicate	Normality	Statistical test	P value	Outliers	Justification
2d	IZ	VEH	7	Mouse	No	Mann-Whitney	* 0,0401	1 DTX	SI > 2 SD from group avg.
right		DTX	8	Mouse
Panel	Type	Group	N value	Replicate	Normality	Statistical test	P value	Outliers	Justification
2e	Latency	VEH	7	Mouse	No	Mann-Whitney	* 0,0164	-
		DTX	9	Mouse
Panel	Type	Group	N value	Replicate	Statistical test	Description	P value	Outliers	Justification
2f	Total SP	VEH	7	Mouse	2-Way ANOVA	DTX effect	* 0.0274	-
		DTX	9	Mouse
Panel	Type	Group	N value	Replicate	Normality	Statistical test	P value	F value	Kruskal-Wallis statistic	Outliers
2g	Emotionality	VEH	7	Mouse	No	Mann-Whitney	** 0.0033	-	-	-
		DTX	9	Mouse
	Sociability	VEH	7	Mouse	No	Mann-Whitney	0.0721	-	-	-
		DTX	9	Mouse
	Anxiety	VEH	7	Mouse	No	Mann-Whitney	0.0907	-	-	-
		DTX	9	Mouse
	Depression/	VEH	7	Mouse	No	Mann-Whitney	** 0.0073	-	-	-
	Anhedonia	DTX	9	Mouse
Panel	Type	Group	N value	Replicate	Normality	Statistical test	P value	Outliers	Justification
2h	E/I frequency	VEH	8	Mouse	No	Mann-Whitney	* 0.0464	-	-	-
	ratio	DTX	9	Mouse
Panel	Type	Group	N value	Replicate	Normality	Statistical test	P value	Outliers	Justification
2l	IZ	PHP.V1-GFP	9	Mouse	No	Mann-Whitney	* 0.0374	1 PHP.V1-Pdgfb	SI > 2 SD from group avg.
		PHP.V1-Pdgfb	9	Mouse
Panel	Type	Group	N value	Replicate	Normality	Statistical test	P value	Outliers	Justification
2m	% extremities	PHP.V1-GFP	9	Mouse	No	Mann-Whitney	** 0.0072	-
		PHP.V1-Pdgfb	10	Mouse
Panel	Gene	Group	N value	Replicate	Normality	Statistical test	P value	Outliers	Justification
2n	Pecam1	PHP.V1-GFP	9	Mouse	Yes	Unpaired T-test	0.1474	-
		PHP.V1-Pdgfb	8	Mouse
	Cldn5	PHP.V1-GFP	8	Mouse	Yes	Unpaired T-test	* 0.0198	1	CT > 2 SD from group avg.
		PHP.V1-Pdgfb	8	Mouse
	Ocln	PHP.V1-GFP	8	Mouse	No	Mann-Whitney	0.5054	1	"
		PHP.V1-Pdgfb	8	Mouse
	Tjp1	PHP.V1-GFP	8	Mouse	Yes	Unpaired T-test	0.918	1	"
		PHP.V1-Pdgfb	8	Mouse
	Pdgfb	PHP.V1-GFP	8	Mouse	Yes	Unpaired T-test	** 0.0053	1	"
		PHP.V1-Pdgfb	8	Mouse
	Pdgfrb	PHP.V1-GFP	9	Mouse	Yes	Unpaired T-test	*** 0.0001	-
		PHP.V1-Pdgfb	8	Mouse
	Anpep	PHP.V1-GFP	9	Mouse	Yes	Unpaired T-test	*** 0.0004	-
		PHP.V1-Pdgfb	8	Mouse
	Abcc9	PHP.V1-GFP	9	Mouse	Yes	Unpaired T-test	** 0.0011	-
		PHP.V1-Pdgfb	8	Mouse
Panel	Type	Group	N value	Replicate	Normality	Statistical test	P value	Outliers	Justification
2p	IPSCs	PHP.V1-GFP	13 neurons, 4 mice	Mouse	Yes	Unpaired T-test	0.1090	1 neuron	> 2 SD from group avg.
		PHP.V1-Pdgfb	21 neurons, 4 mice	Mouse
Panel	Type	Group	N value	Replicate	Statistical test	Description	P value	Outliers	Justification
2r	SI Ratio	PHP.V1-GFP CTRL	6	Mouse	2-Way ANOVA	Interaction	0.7726	1 GFP CTRL	SI > 2 SD from group avg.
		PHP.V1-Pdgfb CTRL	8	Mouse		CSDS effect	0.3206
		PHP.V1-GFP CSDS	12	Mouse		Virus effect	0.7217
		PHP.V1-Pdgfb CSDS	12	Mouse
Panel	Type	Group	N value	Replicate	Statistical test	Description	P value	Outliers	Justification
2s	Open arms	PHP.V1-GFP CTRL	7	Mouse	2-Way ANOVA	Interaction	0.8386	-
		PHP.V1-Pdgfb CTRL	8	Mouse		CSDS effect	0.1439
		PHP.V1-GFP CSDS	12	Mouse		Virus effect	** 0,0059
		PHP.V1-Pdgfb CSDS	12	Mouse
Panel	Type	Group	N value	Replicate	Statistical test	Description	P value	Outliers	Justification
2s	% extremities	PHP.V1-GFP CTRL	7	Mouse	2-Way ANOVA	Interaction	0.938	-
		PHP.V1-Pdgfb CTRL	8	Mouse		CSDS effect	0.3471
		PHP.V1-GFP CSDS	12	Mouse		Virus effect	** 0,0054
		PHP.V1-Pdgfb CSDS	12	Mouse
Panel	Type	Group	N value	Replicate	Statistical test	Description	P value	Outliers	Justification
2t	Grooming	PHP.V1-GFP CTRL	7	Mouse	2-Way ANOVA	Interaction	0.9918	-
		PHP.V1-Pdgfb CTRL	8	Mouse		CSDS effect	* 0,0396
		PHP.V1-GFP CSDS	12	Mouse		Virus effect	* 0,0124
		PHP.V1-Pdgfb CSDS	12	Mouse
Panel	Type	Group	N value	Replicate	Normality	Statistical test	P value	F value	Kruskal-Wallis statistic	Outliers
2u	Emotionality	PHP.V1-GFP CSDS	12	Mouse	No	Mann-Whitney	** 0.0087	-	-	-
		PHP.V1-Pdgfb CSDS	12	Mouse
	Sociability	PHP.V1-GFP CSDS	12	Mouse	Yes	Unpaired t-test	0.1704	-	-	-
		PHP.V1-Pdgfb CSDS	12	Mouse
	Anxiety	PHP.V1-GFP CSDS	12	Mouse	Yes	Unpaired t-test	0.2727	-	-	-
		PHP.V1-Pdgfb CSDS	12	Mouse
	Depression/	PHP.V1-GFP CSDS	12	Mouse	Yes	Unpaired t-test	0.3559	-	-	-
	Anhedonia	PHP.V1-Pdgfb CSDS	12	Mouse

## Sheet: Fig 3
Fig.3 Altered pericyte signalling in MDD
Panel	Type	Group	N value	Replicate	Statistical test	Description	P value	Outliers	Justification
3b	Membrane	CTRL 3h	4	Cells	2-Way ANOVA	Interaction	0.2359	-
		MDD 3h	4	Cells		Tx effect	0.2086
		CTRL 24h	4	Cells		Time effect	** 0.0012
		MDD 24h	4	Cells
Panel	Type	Group	N value	Replicate	Statistical test	Description	P value	Outliers	Justification
3c	Total	CTRL 3h	4	Cells	2-Way ANOVA	Interaction	0.0716	-
		MDD 3h	4	Cells		Tx effect	0.3054
		CTRL 24h	4	Cells		Time effect	****<0,0001
		MDD 24h	4	Cells
Panel	Type	Group	N value	Replicate	Statistical test	Description	P value	Outliers	Justification
3d	Ratio	CTRL 3h	4	Cells	2-Way ANOVA	Interaction	* 0.0490	-
		MDD 3h	4	Cells		Tx effect	0.1155
		CTRL 24h	4	Cells		Time effect	*** 0.0001
		MDD 24h	4	Cells
Panel	Type	Group	N value	Replicate	Normality	Statistical test	P value	Outliers	Justification
3e	pAKT/AKT	CTRL	4	Cells	No	Mann-Whitney	# 0.0571	-
left		MDD	4	Cells
3e	pERK/ERK	CTRL	4	Cells	No	Mann-Whitney	0.6857	-
right		MDD	4	Cells
Panel	Gene	Group	N value	Replicate	Normality	Statistical test	P value	Outliers	Justification
3h	PDGFRB	CTRL	7	Cells	No	Mann-Whitney	0.1206	1	CT > 2 SD from group avg.
		MDD	8	Cells
	CCL2	CTRL	8	Cells	No	Mann-Whitney	** 0.0019	-
		MDD	8	Cells
	CXCL8	CTRL	7	Cells	No	Mann-Whitney	** 0.0059	1	"
		MDD	8	Cells
	IL1B	CTRL	7	Cells	No	Mann-Whitney	*** 0.0003	1	"
		MDD	8	Cells
	IL6	CTRL	8	Cells	No	Mann-Whitney	* 0.0281	-
		MDD	8	Cells
	NFKB	CTRL	7	Cells	No	Mann-Whitney	*** 0.0006	2	1 sample failed to replicate
		MDD	7	Cells					CT > 2 SD from group avg.
	VCAM1	CTRL	8	Cells	No	Mann-Whitney	0.5737	-
		MDD	8	Cells
Panel	Protein	Group	N value	Replicate	Normality	Statistical test	P value	Outliers
3i	CX3CL1	CTRL	7	Cells	No	Mann-Whitney	0.7187	1	CT > 2 SD from group avg.
		MDD	8	Cells
	MCP-1	CTRL	7	Cells	No	Mann-Whitney	0.5142	1	"
		MDD	8	Cells
	IL-8	CTRL	8	Cells	No	Mann-Whitney	0.8785	-
		MDD	8	Cells
	IL-6	CTRL	8	Cells	No	Mann-Whitney	0.3823	-
		MDD	8	Cells
Panel	Type	Group	N value	Replicate	Normality	Statistical test	P value
3j	Correlation	CTRL	8	Cells vs	No	Spearman correlation		PDGFRB	NKFB	IL6	IL1B	CXCL8	CCL2	VCAM1
	circos			Secretome			CX3CL1	0.937124	0.631749	0.0392811	0.690778	0.75108	0.574237	0.937124
							IL-6	0.383317	0.588724	0.293934	0.939408	0.879048	0.759945	0.431611
							IL-8	0.383317	0.701658	0.00680719	0.215217	0.759945	0.644512	0.337368
							MCP-1	0.402602	0.938861	0.817533	0.402602	0.817533	0.378635	0.114996
Panel	Type	Group	N value	Replicate	Normality	Statistical test	P value
3j	Correlation	MDD	8	Cells vs	No	Spearman correlation		PDGFRB	NKFB	IL6	IL1B	CXCL8	CCL2	VCAM1
	circos			Secretome			CX3CL1	0.687867	0.312098	0.335111	0.718138	0.718138	0.486872	0.335111
							IL-6	0.819151	0.939408	0.148231	0.879048	0.819151	0.00251947	0.148231
							IL-8	0.00680719	0.759945	0.0713436	0.0136973	0.0234488	0.148231	0.0713436
							MCP-1	0.0161971	0.877959	0.128888	0.00562059	0.00185103	0.787572	0.128888
Panel	Type	Group	N value	Replicate	Normality	Statistical test	P value	Outliers	Justification
3k	GO:MF	MDD vs CTRL	See Supp. Table 5 for statistics
Panel	Type	Group	N value	Replicate	Normality	Statistical test	P value	Outliers	Justification
3m	Correlation	CTRL	See Supp. Table 6 for statistics
	circos	MDD	See Supp. Table 7 for statistics

## Sheet: Fig 4
Fig.4 Pericyte:endothelial crosstalk in MDD
Panel	Type	Group	N value	Replicate	Normality	Statistical test	P value	Outliers	Justification
4b	Go:MF	MDD vs CTRL	See Supp. Table 9 for statistics
Panel	Type	Group	N value	Replicate	Normality	Statistical test	P value	Outliers	Justification
4f	Correlation	CTRL	See Supp. Table 11 for statistics
	circos	MDD	See Supp. Table 12 for statistics
Panel	Type	Condition	Group	N value	Replicate	Normality	Statistical test	Description	P value	Outliers	Justification
4h	IL-8	Pericytes + serum	CTRL	8	Secretome	No	2-Way ANOVA	Interaction	0.1484	-
			MDD	8	Secretome			Tx effect	**** <0,0001
		Pericytes + secretome	CTRL	7	Secretome			Group	0.0865
			MDD	7	Secretome
Panel	Gene	Condition	Group	N value	Replicate	Normality	Statistical test	Description	P value	Outliers	Justification
4g	CXCL8	Pericytes + serum	CTRL	8	Cells	No	2-Way ANOVA	Interaction	0.0976	-
			MDD	8	Cells			Tx	0.0667
		Pericytes + secretome	CTRL	7	Cells			Group	* 0.0316
			MDD	7	Cells
Panel	Type	Group	N value	Replicate	Normality	Statistical test	P value	Outliers	Justification
4h	Pdgf-bb	CTRL	10	Mouse	Yes	Unpaired T-test	* 0.0138	-
left		SOCIAL STRESS	18	Mouse
Panel	Type	Group	N value	Replicate	Normality	Statistical test	P value	Outliers	Justification
4h	Pdgf-bb	CTRL	10	Mouse	No	Kruskal-Wallis	* 0.0308	-
right		SS	5	Mouse
		RES	13	Mouse
Panel	Type	Group	N value	Replicate	Normality	Statistical test	P value	Outliers	Justification
4i	PDGF-BB	PHQ 0-9	27	Human	No	Mann-Whitney	0.1272	-
		PHQ 10-27	28	Human
Panel	Type	Group	N value	Replicate	Normality	Statistical test		P value
4j	PDGF-BB vs	Anhedonia	55	Human	No	Spearman correlation		0.1969
	correlation	Depress. Mood	55	Human				* 0.0373
		Insomnia	55	Human				0.2527
		Fatigue	55	Human				0.0795
		Appetite	55	Human				0.0746
		Devaluation	55	Human				0.1830
		Concentration	55	Human				0.8415
		Psychomotor	55	Human				* 0.0392
		Death thoughts	55	Human				0.0827
		Total PHQ-9	55	Human				* 0.0292
Panel	Type	Group	N value	Replicate	Normality	Statistical test	P value	Outliers	Justification
4k	PDGF-BB	CTRL	21	Human	Yes	One-way ANOVA	* 0.0188	-
		MDD	18	Human
		BD	16	Human
Panel	Type	Group	N value	Replicate	Statistical test	Method	P value	Area
4l	ROC	CTRL vs	21	Human	ROC	Wilson/Brown	0.1053	0.6521
		MDD	18	Human
	ROC	MDD vs	18	Human	ROC	Wilson/Brown	* 0.024	0.7274
		BD	16	Human

## Sheet: Fig S1
Supp.Fig.1 - Supplementary data and behavior for qPCR cohorts
Panel	Gene	Group	N value	Replicate	Normality	Statistical test	P value	F value	Kruskal-Wallis statistic	Outliers	Justification
S1a	Cspg4	CTRL	9	Mouse	Yes	1-way ANOVA	* 0.0259	4.195	-	2	SI > 2 SD from group avg.
upper		SS	7	Mouse
		RES	14	Mouse
Panel	Gene	Group	N value	Replicate	Normality	Statistical test	P value	F value	Kruskal-Wallis statistic	Outliers	Justification
S1a	Des	CTRL	10	Mouse	Yes	1-way ANOVA	* 0.0343	3.798	-	-
upper		SS	7	Mouse
		RES	15	Mouse
Nac
Panel	Gene	Group	N value	Replicate	Normality	Statistical test	P value	F value	Kruskal-Wallis statistic	Outliers	Justification
S1b-c	Pecam1	CTRL	10	Mouse	Yes	1-way ANOVA	0.3815	0.9941	-	1	CT > 2 SD from group avg.
		SS	7	Mouse
		RES	13	Mouse
	Vegfa	CTRL	10	Mouse	Yes	1-way ANOVA	0.988	0.01206	-	2	"
		SS	6	Mouse
		RES	13	Mouse
	Vegfb	CTRL	10	Mouse	Yes	1-way ANOVA	0.72	0.3329	-	3	"
		SS	5	Mouse
		RES	13	Mouse
	Pdgfb	CTRL	10	Mouse	Yes	1-way ANOVA	0.5338	0.6421	-	-
		SS	7	Mouse
		RES	14	Mouse
	Pdgfrb	CTRL	9	Mouse	Yes	1-way ANOVA	0.2641	1.405	-	3	"
		SS	5	Mouse
		RES	14	Mouse
	Cspg4	CTRL	10	Mouse	Yes	1-way ANOVA	0.5759	0.5625	-	-
		SS	7	Mouse
		RES	14	Mouse
	Des	CTRL	10	Mouse	Yes	1-way ANOVA	0.5759	0.5625	-	-
		SS	7	Mouse
		RES	14	Mouse
	Mcam	CTRL	10	Mouse	No	Kruskal-Wallis	** 0.0022	-	12.21	1	"
		SS	6	Mouse
		RES	14	Mouse
	Anpep	CTRL	10	Mouse	Yes	1-way ANOVA	* 0.0490	3.395	-	2	"
		SS	6	Mouse
		RES	13	Mouse
	Abcc9	CTRL	9	Mouse	Yes	1-way ANOVA	0.1745	1.874	-	3	Sample failed to replicate
		SS	6	Mouse
		RES	13	Mouse
	Gapdh	CTRL	10	Mouse	Yes	1-way ANOVA	0.3823	1.009	-	-
		SS	7	Mouse
		RES	14	Mouse
Panel	Type	Group	N value	Replicate	Statistical test		P value	F value	R-squared	Outliers
S1c	Pdgfb vs SI	CTRL	10	Mouse	Simple linear regression		0.8608	0.0313	0.0011	See above
		SS	7	Mouse
		RES	14	Mouse
	Pdgfb vs Pdgfrb	CTRL	9	Mouse	Simple linear regression		**** <0.0001	50.05	0.6581	See above
		SS	5	Mouse
		RES	14	Mouse
Panel	Type	Group	N value	Replicate	Normality	Statistical test	P value	F value	Kruskal-Wallis statistic	Outliers
S1d	SI	CTRL	12	Mouse	No	Kruskal-Wallis	**** <0.0001	-	26.81	-
		SS	15	Mouse
		RES	13	Mouse
S1d	Corners	CTRL	12	Mouse	No	Kruskal-Wallis	0.3204	-	2.276	-
	Absent	SS	15	Mouse
		RES	13	Mouse
S1d	Corners	CTRL	12	Mouse	No	Kruskal-Wallis	** 0.0084	-	9.564	-
	Present	SS	15	Mouse
		RES	13	Mouse
S1d	IZ	CTRL	12	Mouse	No	Kruskal-Wallis	0.2584	-	2.707	-
	Absent	SS	15	Mouse
		RES	13	Mouse
S1d	IZ	CTRL	12	Mouse	No	Kruskal-Wallis	**** <0.0001	-	27.70	-
	Present	SS	15	Mouse
		RES	13	Mouse
S1d	Locomotion	CTRL	12	Mouse	No	Kruskal-Wallis	0.1182	-	4.271	-
		SS	15	Mouse
		RES	13	Mouse
PFC
Panel	Gene	Group	N value	Replicate	Normality	Statistical test	P value	F value	Kruskal-Wallis statistic	Outliers	Justification
S1e	Pecam1	CTRL	12	Mouse	Yes	Kruskal-Wallis	0.1963	-		-
		SS	12	Mouse
		RES	10	Mouse
	Vegfa	CTRL	12	Mouse	No	Kruskal-Wallis	* 0.0219	-	7.640	-
		SS	12	Mouse
		RES	10	Mouse
	Vegfb	CTRL	12	Mouse	Yes	1-way ANOVA	0.1205	2.268	-	-
		SS	12	Mouse
		RES	10	Mouse
	Pdgfb	CTRL	12	Mouse	Yes	1-way ANOVA	0.0842	2.684	-	-
		SS	12	Mouse
		RES	10	Mouse
	Pdgfrb	CTRL	12	Mouse	Yes	1-way ANOVA	0.2292	1.545	-	-
		SS	12	Mouse
		RES	10	Mouse
	Cspg4	CTRL	10	Mouse	Yes	1-way ANOVA	0.7554	0.2830	-	-
		SS	10	Mouse
		RES	12	Mouse
	Des	CTRL	12	Mouse	No	Kruskal-Wallis	0.6043	-	1.007	-
		SS	12	Mouse
		RES	10	Mouse
	Mcam	CTRL	12	Mouse	No	Kruskal-Wallis	0.5180	-	1.316	1	CT > 2 SD from group avg.
		SS	12	Mouse
		RES	9	Mouse
	Gapdh	CTRL	6	Mouse	No	Kruskal-Wallis	0.2475	-	2.889	-	* Only part of the samples were used to generate Gapdh
		SS	6	Mouse
		RES	6	Mouse
Nac
Panel	Gene	Group	N value	Replicate	Normality	Statistical test	P value	F value	Kruskal-Wallis statistic	Outliers	Justification
S1f	Pecam1	CTRL	12	Mouse	Yes	1-way ANOVA	0.4911	0.7249	-	-
		SS	15	Mouse
		RES	13	Mouse
	Vegfa	CTRL	12	Mouse	No	Kruskal-Wallis	0.1275	-	4.120	1	CT > 2 SD from group avg.
		SS	15	Mouse
		RES	12	Mouse
	Vegfb	CTRL	12	Mouse	Yes	1-way ANOVA	* 0.0416	3.479	-	1	"
		SS	14	Mouse
		RES	13	Mouse
	Pdgfb	CTRL	11	Mouse	Yes	1-way ANOVA	0.3368	1.127	-	6	CT > 2 SD from group avg.
		SS	13	Mouse							and Sample failed to replicate
		RES	10	Mouse
	Pdgfrb	CTRL	12	Mouse	Yes	1-way ANOVA	0.5972	0.5229	-	1	"
		SS	15	Mouse
		RES	12	Mouse
	Cspg4	CTRL	12	Mouse	Yes	1-way ANOVA	0.477	0.7552	-	-
		SS	15	Mouse
		RES	13	Mouse
	Des	CTRL	12	Mouse	Yes	1-way ANOVA	0.7248	0.3247	-
		SS	15	Mouse
		RES	13	Mouse
	Mcam	CTRL	12	Mouse	Yes	1-way ANOVA	0.9762	0.0214	-	1	"
		SS	15	Mouse
		RES	12	Mouse

## Sheet: Fig S2
Supp.Fig.2 – Extended graphs for principal component analysis (PCA)
Panel	Type	Dimension	Eigenvalue	% of variance	cumulative % of variance
S2a	PCA	1	3.4441911	34.441911	34.44191
		2	2.2349023	22.349023	56.79093
		3	1.2070063	12.070063	68.86100
		4	0.9252553	9.252553	78.11355
		5	0.7337993	7.337993	85.45154
		6	0.4446537	4.446537	89.89808
		7	0.3247979	3.247979	93.14606
		8	0.2950334	2.950334	96.09639
		9	0.2608282	2.608282	98.70468
		10	0.1295324	1.295324	100.00000
Panel	Type	Dimension	Eigenvalue	% of variance	cumulative % of variance
S2b	PCA	1	4.238960477	47.0995609	47.09956
		2	1.854191041	20.6021227	67.70168
		3	1.075716781	11.9524087	79.65409
		4	0.725402705	8.0600301	87.71412
		5	0.516787775	5.7420864	93.45621
		6	0.272721945	3.0302438	96.48645
		7	0.207768971	2.3085441	98.79500
		8	0.099016812	1.1001868	99.89518
		9	0.009433493	0.1048166	100.00000
Panel	Type	Dimension	Eigenvalue	% of variance	cumulative % of variance
S2c	PCA	1	3.4226664	48.895234	48.89523
		2	1.1645466	16.636380	65.53161
		3	0.8532233	12.188905	77.72052
		4	0.6203979	8.862828	86.58335
		5	0.4398566	6.283665	92.86701
		6	0.3344806	4.778295	97.64531
		7	0.1648285	2.354693	100.00000
Panel	Type	Dimension	Eigenvalue	% of variance	cumulative % of variance
S2d	PCA	1	2.3362030	33.374329	33.37433
		2	1.3694570	19.563671	52.93800
		3	0.9879569	14.113670	67.05167
		4	0.9000146	12.857352	79.90902
		5	0.6730955	9.615650	89.52467
		6	0.4439697	6.342424	95.86710
		7	0.2893033	4.132904	100.00000

## Sheet: Fig S3
Supp.Fig.3 - Supplementary data for RNA-sequencing and for mouse and human imaging cohorts
Panel	Type	Group	N value	Replicate	Normality	Statistical test	P value	F value	Kruskal-Wallis statistic	Outliers
S3c	Corners	CTRL	5	Mouse	No	Kruskal-Wallis	0.6503	-	0.9529	-
	Absent	SS	5	Mouse
		RES	6	Mouse
S3c	Corners	CTRL	5	Mouse	No	Kruskal-Wallis	0.1170	-	4.259	-
	Present	SS	5	Mouse
		RES	6	Mouse
S3c	IZ Absent	CTRL	5	Mouse	No	Kruskal-Wallis	0.3762	-	2.059	-
	Absent	SS	5	Mouse
		RES	6	Mouse
S3c	IZ Absent	CTRL	5	Mouse	No	Kruskal-Wallis	0.1893	-	3.418	-
	Present	SS	5	Mouse
		RES	6	Mouse
S3c	Locomotion	CTRL	5	Mouse	No	Kruskal-Wallis	0.1025	-	4.529	-
	Present	SS	5	Mouse
		RES	6	Mouse
Panel	Type	Group	N value	Replicate	Normality	Statistical test	P value	F value	Kruskal-Wallis statistic	Outliers
S3d	Coverage	CTRL	5	Mouse	No	Kruskal-Wallis	0.0611	-	5.404	-
left		SS	5	Mouse
		RES	6	Mouse
Panel	Type	Group	N value	Replicate	Normality	Statistical test	P value	F value	Kruskal-Wallis statistic	Outliers
S3d	Number	CTRL	5	Mouse	No	Kruskal-Wallis	0.1197	-	4.265	-
right		SS	5	Mouse
		RES	6	Mouse
Panel	Type	Group	N value	Replicate	Normality	Statistical test	P value	F value	Kruskal-Wallis statistic	Outliers
S3e	Diameter	CTRL	5	Mouse	No	Kruskal-Wallis	0.8523	-	0.3647	-
		SS	5	Mouse
		RES	6	Mouse
Panel	Type	Group	N value	Replicate	Normality	Statistical test	P value	F value	Kruskal-Wallis statistic	Outliers
S3f	SI Ratio	CTRL	4	Mouse	No	Kruskal-Wallis	*** 0.0010	-	9.643	-
		SS	5	Mouse
		RES	5	Mouse
	Corners	CTRL	4	Mouse	No	Kruskal-Wallis	0.7711	-	0.5914	-
	Absent	SS	5	Mouse
		RES	5	Mouse
	Corners	CTRL	4	Mouse	No	Kruskal-Wallis	* 0.0148	-	7.426	-
	Present	SS	5	Mouse
		RES	5	Mouse
	IZ Absent	CTRL	4	Mouse	No	Kruskal-Wallis	0.5045	-	1.483	-
	Absent	SS	5	Mouse
		RES	5	Mouse
	IZ Absent	CTRL	4	Mouse	No	Kruskal-Wallis	* 0.0213	-	6.896	-
	Present	SS	5	Mouse
		RES	5	Mouse
	Locomotion	CTRL	4	Mouse	No	Kruskal-Wallis	0.9699	-	0.08571	-
	Present	SS	5	Mouse
		RES	5	Mouse
Panel	Type	Group	N value	Replicate	Normality	Statistical test	P value	F value	Kruskal-Wallis statistic
S3g	Coverage	CTRL	4	Mouse	No	Kruskal-Wallis	0.3022	-	2.466	-
		SS	5	Mouse
		RES	5	Mouse
Panel	Type	Group	N value	Replicate	Normality	Statistical test	P value	F value
S3h	Coverage	CTRL	4	Human	No	Mann-Whitney	0.3677	-
		MDD	8	Human

## Sheet: Fig S4
Supp.Fig.4 - Supplementary data for pericyte ablation experiments in females
Panel	Type	Group	N value	Replicate	Normality	Statistical test	P value	F value	Kruskal-Wallis statistic	Outliers	Justification
S4a	IZ Present	VEH	7	Mouse	No	Mann-Whitney	0.7789	-	-	1	SI > 2 SD from group avg.
		DTX	8	Mouse
S4a	Corners	VEH	7	Mouse	No	Mann-Whitney	0.0939	1 DTX	SI > 2 SD from group avg.
	absent	DTX	8	Mouse
S4a	Corners	VEH	7	Mouse	No	Mann-Whitney	0.6126	-	-	1	"
	Present	DTX	8	Mouse
S4a	Locomotion	VEH	7	Mouse	No	Mann-Whitney	0.4634	-	-	1	"
		DTX	8	Mouse
Panel	Type	Group	N value	Replicate	Normality	Statistical test	P value	Outliers	Justification
S4b	Grooming	VEH	7	Mouse	No	Mann-Whitney	0.0587	-
		DTX	9	Mouse
Panel	Type	Group	N value	Replicate	Normality	Statistical test	P value	F value	Kruskal-Wallis statistic	Outliers
S4c	Closed	VEH	7	Mouse	No	Mann-Whitney	0.9182	-	-	-
		DTX	9	Mouse
S4c	Open	VEH	7	Mouse	No	Mann-Whitney	0.7785	-	-	-
		DTX	9	Mouse
S4c	Center	VEH	7	Mouse	No	Mann-Whitney	0.4698	-	-	-
		DTX	9	Mouse
S4c	Locomotion	VEH	7	Mouse	No	Mann-Whitney	0.6065	-	-	-
		DTX	9	Mouse
Panel	Type	Group	N value	Replicate	Normality	Statistical test	P value	F value	Kruskal-Wallis statistic	Outliers
S4d	FST	VEH	7	Mouse	No	Mann-Whitney	0.5868	-	-	-
left		DTX	9	Mouse
S4d	FST	VEH	7	Mouse	No	Mann-Whitney	0.1416	-	-	-
right		DTX	9	Mouse
Panel	Type	Group + n animals	N cells	Replicate	Normality	Statistical test	P value	F value	Kruskal-Wallis statistic	Outliers	Justification
S7f	EPSCs freq	VEH (3)	13	Mouse	No	Mann-Whitney	0.3499	-	-	-
		DTX (3)	14	Mouse
S7f	EPSCs ampl	VEH (3)	13	Mouse	Yes	Unpaired t-test	0.9770	-	-	-
		DTX (3)	14	Mouse
S7f	IPSCs freq	VEH (3)	8	Mouse	No	Mann-Whitney	0.9835	-	-	-
		DTX (3)	10	Mouse
S7f	IPSC ampl	VEH (3)	8	Mouse	No	Mann-Whitney	* 0.0117	-	-	-
		DTX (3)	10	Mouse
S7f	E/I ampl ratio	VEH (3)	8	Mouse	No	Mann-Whitney	0.0554	-	-	1	Grubb's
		DTX (3)	9	Mouse

## Sheet: Fig S5
Supp.Fig.5 - Supplementary data for pericyte ablation experiments in male mice
Panel	Type	Group	N value	Replicate	Normality	Statistical test	P value	F value	Kruskal-Wallis statistic	Outliers
S5a	SI	VEH	8	Mouse	No	Mann-Whitney	0.8350	-	-	-
		DTX	9	Mouse
S5a	IZ Absent	VEH	8	Mouse	No	Mann-Whitney	0.5581	-	-	-
		DTX	9	Mouse
S5a	IZ Present	VEH	8	Mouse	No	Mann-Whitney	0.8884	-	-	-
		DTX	9	Mouse
S5a	Corners	VEH	8	Mouse	No	Mann-Whitney	0.6557	-	-	-
	Absent	DTX	9	Mouse
S5a	Corners	VEH	8	Mouse	No	Mann-Whitney	0.5414	-	-	-
	Present	DTX	9	Mouse
S5a	Locomotion	VEH	8	Mouse	No	Mann-Whitney	0.4807	-	-	-
		DTX	9	Mouse
Panel	Type	Group	N value	Replicate	Normality	Statistical test	P value	F value	Kruskal-Wallis statistic	Outliers
S5b	Closed	VEH	8	Mouse	No	Mann-Whitney	0.1996	-	-	-
		DTX	9	Mouse
S5b	Open	VEH	8	Mouse	No	Mann-Whitney	0.9429	-	-	-
		DTX	9	Mouse
S5b	Center	VEH	8	Mouse	No	Mann-Whitney	* 0.0360	-	-	-
		DTX	9	Mouse
S5b	Locomotion	VEH	8	Mouse	No	Mann-Whitney	0.4234	-	-	-
		DTX	9	Mouse
Panel	Type	Group	N value	Replicate	Normality	Statistical test	P value	F value	Kruskal-Wallis statistic	Outliers
S5c	Latency	VEH	8	Mouse	No	Mann-Whitney	0.1996	-	-	-
		DTX	9	Mouse
S5c	Grooming	VEH	8	Mouse	No	Mann-Whitney	0.5414	-	-	-
		DTX	9	Mouse
Panel	Type	Group	N value	Replicate	Normality	Statistical test	P value	F value	Kruskal-Wallis statistic	Outliers	Justification
S5d	SP	VEH	7	Mouse	-	2-way ANOVA	DTX: 0.2873	-	-	2	SP > 2 SD from group avg.
	24 vs 48h	DTX	8	Mouse			Time: ** 0.0062
S5d	SP	VEH	7	Mouse	No	Mann-Whitney	0.3969	-	-	-
	Total	DTX	8	Mouse
Panel	Type	Group	N value	Replicate	Normality	Statistical test	P value	F value	Kruskal-Wallis statistic	Outliers
S5e	FST	VEH	8	Mouse	No	Mann-Whitney	0.8884	-	-	-
		DTX	9	Mouse
S5e	FST	VEH	8	Mouse	No	Mann-Whitney	0.9626	-	-	-
		DTX	9	Mouse
Panel	Type	Group	N value	Replicate	Normality	Statistical test	P value	F value	Kruskal-Wallis statistic	Outliers
S5f	Emotionality	VEH	8	Mouse	No	Mann-Whitney	0.1919	-	-	-
		DTX	9	Mouse
S5f	Sociability	VEH	8	Mouse	No	Mann-Whitney	0.8884	-	-	-
		DTX	9	Mouse
S5f	Anxiety	VEH	8	Mouse	No	Mann-Whitney	0.9441	-	-	-
		DTX	9	Mouse
S5f	Depression/	VEH	8	Mouse	No	Mann-Whitney	0.1388	-	-	-
	Anhedonia	DTX	9	Mouse

## Sheet: Fig S6
Supp.Fig.6 – In vitro validation of PHP.V1-Pdgfb virus
Panel	Gene	Group	N value	Replicate	Normality	Statistical test	P value	F value	Kruskal-Wallis statistic	Outliers	Justification
S6a	Pdgfb	PHP.V1-GFP	6	Bend.3i	No	Mann-Whitney	** 0.0022	-	-	-
		PHP.V1-Pdgfb	6	Bend.3i
	Pecam1	PHP.V1-GFP	6	Bend.3i	No	Mann-Whitney	* 0.0411	-	-	-
		PHP.V1-Pdgfb	6	Bend.3i
	Cldn5	PHP.V1-GFP	6	Bend.3i	No	Mann-Whitney	*0.0152	-	-	-
		PHP.V1-Pdgfb	6	Bend.3i
	Ocln	PHP.V1-GFP	6	Bend.3i	No	Mann-Whitney	*0.0152	-	-	-
		PHP.V1-Pdgfb	6	Bend.3i
	Tjp1	PHP.V1-GFP	6	Bend.3i	No	Mann-Whitney	0.1797	-	-	-
		PHP.V1-Pdgfb	6	Bend.3i
Panel	Type	Group	N value	Replicate	Normality	Statistical test	P value	F value	Kruskal-Wallis statistic	Outliers	Justification
S6b	TEER	PHP.V1-GFP	2	Bend.3i	-	2-way ANOVA	Interaction: **** <0,0001	-	-	-
		PHP.V1-Pdgfb	2	Bend.3i
Panel	Type	Group	N value	Replicate	Normality	Statistical test	P value	F value	Kruskal-Wallis statistic	Outliers	Justification
S6c	Wound	PHP.V1-GFP	4	Bend.3i	-	2-way ANOVA	Interaction: *** 0.0003	-	-	-
		PHP.V1-Pdgfb	4	Bend.3i

[truncated: 3 more sheets: Fig S7, Fig S9, Fig S10]
